# Supplementary material for: Expression Analysis Reveals Differentially Expressed Genes in BPH and WBPH Associated with Resistance in Rice RILs Derived from a Cross between RP2068 and TN1
Source: MDPI journal article supplement (doi:10.3390/ijms241813982), 2023-09-12
Supplement: s1 [file s1]

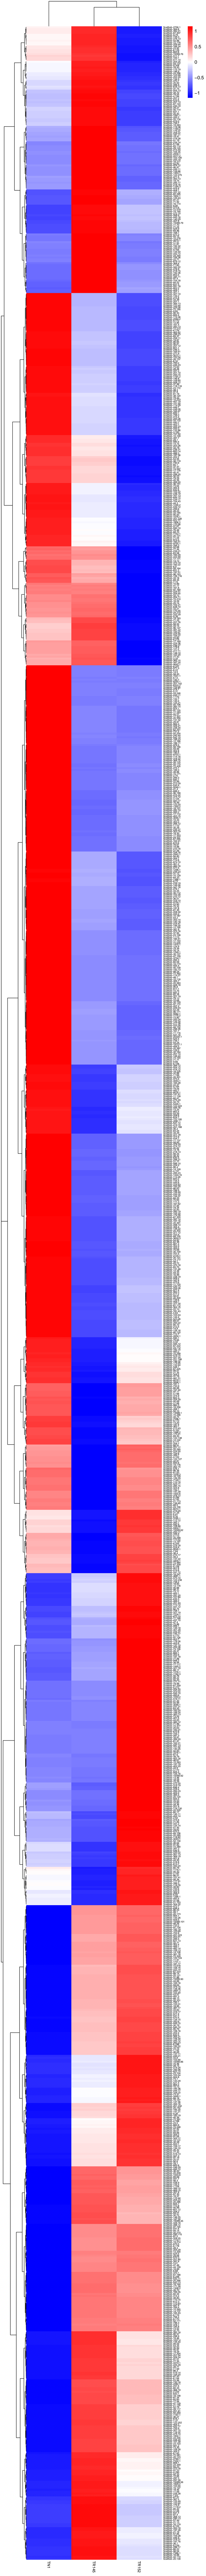

**Supplementary Figure S1:** Hierarchical clustering heatmap depicting overall results of the FPKM clustering of differentially expressing genes (DEGs) of WBPH (using  $\log_2(\text{FPKM}+1)$  values) while feeding on different RILs (TN1, TR145 and TR152). The scaffold IDs are provided on the right. The color scale represents an increase in gene expression from blue (-1) to red (1).
