# Supplementary material for: Expression Analysis Reveals Differentially Expressed Genes in BPH and WBPH Associated with Resistance in Rice RILs Derived from a Cross between RP2068 and TN1
Source: Int J Mol Sci. 2023 Sep 12;24(18):13982. doi: 10.3390/ijms241813982 (PMC10531025; doi:10.3390/ijms241813982)
Supplement: Supplementary file 1 [file ijms-24-13982-s001.zip › Supplementary Tables S1-S4.xlsx]

## Sheet: Table S1
Table S1: List of groups of insects sampled under current study
BPH		WBPH
B_TN1-6h-R1	TN1-6h	W_TN1-6h-R1
B_TN1-6h-R2		W_TN1-6h-R2
B_TN1-6h-R3		W_TN1-6h-R3
B_TN1-12h-R1	TN1-12h	W_TN1-12h-R1
B_TN1-12h-R2		W_TN1-12h-R2
B_TN1-12h-R3		W_TN1-12h-R3
B_TR24SS-6h-R1	TR24SS-6h	W_TR24SS-6h-R1
B_TR24SS-6h-R2		W_TR24SS-6h-R2
B_TR24SS-6h-R3		W_TR24SS-6h-R3
B_TR24SS-12h-R1	TR24SS-12h	W_TR24SS-12h-R1
B_TR24SS-12h-R2		W_TR24SS-12h-R2
B_TR24SS-12h-R3		W_TR24SS-12h-R3
B_TR94RR-6h-R1	TR94RR-6h	W_TR94RR-6h-R1
B_TR94RR-6h-R2		W_TR94RR-6h-R2
B_TR94RR-6h-R3		W_TR94RR-6h-R3
B_TR94RR-12h-R1	TR94RR-12h	W_TR94RR-12h-R1
B_TR94RR-12h-R2		W_TR94RR-12h-R2
B_TR94RR-12h-R3		W_TR94RR-12h-R3
B_TR145RS-6h-R1	TR145RS-6h	W_TR145RS-6h-R1
B_TR145RS-6h-R2		W_TR145RS-6h-R2
B_TR145RS-6h-R3		W_TR145RS-6h-R3
B_TR145RS-12h-R1	TR145RS-12h	W_TR145RS-12h-R1
B_TR145RS-12h-R2		W_TR145RS-12h-R2
B_TR145RS-12h-R3		W_TR145RS-12h-R3
B_TR152SR-6h-R1	TR152SR-6h	W_TR152SR-6h-R1
B_TR152SR-6h-R2		W_TR152SR-6h-R2
B_TR152SR-6h-R3		W_TR152SR-6h-R3
B_TR152SR-12h-R1	TR152SR-12h	W_TR152SR-12h-R1
B_TR152SR-12h-R2		W_TR152SR-12h-R2
B_TR152SR-12h-R3		W_TR152SR-12h-R3

## Sheet: Table S2
Table S2: List of genes shortlisted for RT-PCR and their primer sequences
BPH genes	Forward Primer name	Primer sequence	Reverse primer name	Primer sequence	RT Annealing temp	Reference
Carboxylesterase	NlCarE-F	GCAGAGAAGTCGCAGGAACAGGAT	NlCarE-F	GAGATGATGCCTTCCTTGTTGGTCA	58°C	This study
Cuticle protein	NlCPR70-F	GTTGAAGGCCGAGTACGAGGAT	NlCPR70-R	GCGGCTCTCCTGCTGCAA	60°C	This study
Cytochrome P450	NlCypP450-F	TGCTGAGGCAGAAGATTTCA	NlCypP450-R	GACGTCACGCATTTCCAGTA	58°C	Peng et al. 2017
Endoglucanase	NlEng-F	GCAGCAAATACGACTACAGC	NlEng-R	CAAATCTTCACCCTTCAGCC	56°C	This study
Mucin-like	NlMul-F	TCAGGAACTTTGCCAGACGC	NlMul-R	CGGGAAGCAGCACTCCACAT	60°C	Huang et al. 2017
Peptide methionine sulfoxide reductase	NlPMSR-F	GAAGCCATTGACATTGACTAC	NlPMSR-R	GGAATGACTTTAGTGACGATG	61°C	Huang et al. 2020
Serine protease	NlSP-F	GGTTGAGGTATGTTTGGGTTGC	NlSP-R	GTGGTGCCGTTGTGGGTA	58°C	This study
Serine/Arginine rich splicing factor	NlSRP-F	ACAACGAAGCAGCCATTC	NlSRP-R	TAAGTAGCACTCAGGTCCG	58°C	This study
Sugar transporter	NlSugT-F	CTGTGAAGGAGAGGAGAAAAC	NlSugT-R	GTAACTGGGGTAATAGAACTG	60°C	This study
Superoxide Dismutase	NlSOD-F	ACGGCAAGGAGCACGGAAGT	NlSOD-R	GTTCAAGCCTTAGTGATGCCTACGA	60°C	Yue et al. 2019
ACTIN- HOUSE KEEPING	NlAct-F	TGTGATGGTCGGTATGGGTC	NlAct-R	ATTGTAGAATGTGTGATGCC	60°C	This study
WBPH genes
ABC transporter	WABC-F	GGGAAGAAGCAGGGTGATACGTG	WABC-R	TGCCAATCTCAGTTTCACGCAAGG	60°C	This study
ATP-dependent RNA helicase	WRhel-F	CGACGTGTGCGGGCTCTGGT	WRhel-R	GACTCTCGTAGCCACCGTCCACAC	56°C	This study
Carboxypeptidase	WCpep-F	TCCAGCCCATGATAAGAACCACCAC	WCpep-R	TCTGATGCTCATCCCACAAACCAGT	60°C	This study
CRAL/TRIO domain	WCRTR-F	GCTACGTCACCCTTCCCAAGCTG	WCRTR-R	GGATAGGTGATGGAGGCGACGTGA	58°C	This study
Cuticle protein	WCut-F	AACGTGCTGATAAAACCGACTGAA	WCut-R	TCATGGATGAAAGATGGAATGGA	58°C	This study
Cytochrome P450	WP450-F	AAGCCCATACAAGAAGTTCGTCCG	WP450-R	GGTCCATTCCCAGCATCACCAG	60°C	This study
Leucine rich repeat and Immunoglobin domain	WLRIG-F	AGAAATTGCCTCTCGACAAAATGA	WLRIG-R	CCGCCGCCAAATCTTACATC	59°C	This study
Serine protease stubble	WSPS-F	TCTCTCACAGCCAGACAGGTTTGA	WSPS-R	CCCATCCTGCCACCACTCCTG	58°C	This study
Sugar Transporter	WSugT-F	GCCGCTCGCTGTCCAAACTA	WSugT-R	CGAGAATGACGAACGGCTTGAGC	60°C	This study
Trypsin	WTryp-F	ATTCCTGCCGATGTGTGTGTGGA	WTryp-R	TTCAACGCAATGAGCCGCAGTC	60°C	This study
ACTIN-HOUSE KEEPING	SfAct-F	GGTTATGCTCTTCCCCACG	SfAct-R	CTTCTCCTTGATGTCCCTGA	60°C	This study

## Sheet: Table S3
Table S3: Mapstat summary of the RNA-Seq data depicting mapping reads and rates
Sample name	W_TN1-R1	W_TN1-R2	W_TN1-R3	W_TR145RS_R1	W_TR145RS_R2	W_TR145RS_R3	W_TR152SR-R1	W_TR152SR-R2	W_TR152SR-R3
Total reads	47169576	42106340	43044260	52705754	46627936	50132220	44186722	42962994	41958694
Total mapped reads	41261176	36903225	37513637	46320403	40897986	44756697	38544849	37609317	36119249
Uniquely mapped reads	30032578	27819540	27463355	35069689	31179635	30594813	28694686	28352984	27252643
Multiple mapped reads	11228598	9083685	10050282	11250714	9718351	14161884	9850163	9256333	8866606
Total mapping rate	0.8747	0.8764	0.8715	0.8788	0.8771	0.8928	0.8723	0.8754	0.8608
Uniquely mapping rate	0.6367	0.6607	0.638	0.6654	0.6687	0.6103	0.6494	0.6599	0.6495

## Sheet: Table S4
Table S4: Summary of gene expression analysis. The raw data is summarized here as the FPKM(Fragments Per kilobase of transcript sequence per Million base pairs sequenced) reads along with brief details of the genes.
gene_id	W_TR152SR_R1	W_TR152SR_R2	W_TR152SR_R3	W_TN1_R1	W_TN1_R2	W_TN1_R3	W_TR145RS_R1	W_TR145RS_R2	W_TR145RS_R3	gene_name	gene_chr	gene_start	gene_end	gene_strand	gene_length	gene_biotype	gene_description	tf_family
Scaffold-210.7	9485.19	6354.82	6848.5	19773.4	6116.98	10110.5	8345.56	7650.59	8781.12	protein_coding_gene	Scaffold-210	200748	205200	-	1554	-	- && - && -	-
Scaffold-15.286	10941.2	6741	8803.45	14840.6	6936.43	6403.59	7828.72	6312.54	5037.38	protein_coding_gene	Scaffold-15	6603385	6614530	+	875	-	- && - && PF07464:Apolipophorin-III precursor (apoLp-III)	-
Scaffold-9.314	7487.57	5884.96	6585.71	17818	6093.01	7813.35	8832.41	6375.45	5880.64	protein_coding_gene	Scaffold-9	5702126	5714011	-	532	-	- && P05389.1 RecName: Full=60S acidic ribosomal protein P2; AltName: Full=Acidic ribosomal protein RPA1 && PF00428:60s Acidic ribosomal protein	-
Scaffold-6.297	6342.97	5110.81	5206.6	15074.5	5453.79	6740.15	8328.54	7083.18	5789.28	protein_coding_gene	Scaffold-6	5175857	5182725	-	276	-	- && Q9VMU4.3 RecName: Full=60S ribosomal protein L37a && PF01780:Ribosomal L37ae protein family	-
Scaffold-33.19	3973.78	6374.63	4330.74	5899.59	9571.66	12214.5	7669.55	7579.06	6999.03	protein_coding_gene	Scaffold-33	181143	185923	-	948	-	- && - && -	-
Scaffold-175.58	6130.15	5088.76	5792.82	13107	5546.46	6418.17	6682.64	5813.71	4976.04	protein_coding_gene	Scaffold-175	883851	893364	+	871	-	- && Q94624.1 RecName: Full=40S ribosomal protein S6 && PF01092:Ribosomal protein S6e	-
Scaffold-10.179	6619.57	5702.1	5447.54	10746.6	4774.6	6330.4	7380.4	6976.68	5313.77	protein_coding_gene	Scaffold-10	3375904	3390380	-	1420	-	- && Q9W1C9.2 RecName: Full=Ejaculatory bulb-specific protein 3; AltName: Full=Ejaculatory bulb-specific protein III; AltName: Full=PEB-meIII; AltName: Full=PEBmelIII; Flags: Precursor && PF03392:Insect pheromone-binding family, A10/OS-D	-
Scaffold-323.23	6044.18	5098.4	5413.25	11260.5	5072.51	6216.34	6047.84	6075.62	4318.82	protein_coding_gene	Scaffold-323	321199	330350	+	1099	-	- && P31009.2 RecName: Full=40S ribosomal protein S2; AltName: Full=Protein strings of pearls && PF00333:Ribosomal protein S5, N-terminal domain|PF03719:Ribosomal protein S5, C-terminal domain	-
Scaffold-57.67	5282.19	5407.32	4569.04	7453.74	5845.11	7880.02	6171.36	6778.36	5169.2	protein_coding_gene	Scaffold-57	1441835	1448526	-	1090	-	- && Q1HPS0.1 RecName: Full=Myosin regulatory light chain 2; Short=MLC-2 && -	-
Scaffold-1.102	5749.15	4782.41	5052	11183.1	5013.93	6025.83	6204.37	5155.04	4426.52	protein_coding_gene	Scaffold-1	1844265	1848262	+	575	-	- && Q00454.1 RecName: Full=60S ribosomal protein L27a && PF00828:Ribosomal protein L18e/L15	-
Scaffold-33.52	6002.74	5009.5	5331.18	5750.71	6672.96	7402.1	5496.75	6698.41	5038.83	protein_coding_gene	Scaffold-33	682499	692703	+	1535	-	- && P49871.1 RecName: Full=Actin, muscle; Flags: Precursor && PF00022:Actin	Actin
Scaffold-59.59	5757.51	4824.44	5152.32	10458.8	4857.6	5805.81	6177.99	5313.43	4450.09	protein_coding_gene	Scaffold-59	1259579	1266700	-	725	-	- && P55935.2 RecName: Full=40S ribosomal protein S9 >B4PEU8.1 RecName: Full=40S ribosomal protein S9 && PF00163:Ribosomal protein S4/S9 N-terminal domain|PF01479:S4 domain	S4
Scaffold-233.25	5561.94	4406.8	4919.91	11307.9	4660.14	5794.81	6172.54	5206.2	4445.92	protein_coding_gene	Scaffold-233	541476	546551	+	475	-	- && P48588.3 RecName: Full=40S ribosomal protein S25 && PF03297:S25 ribosomal protein	-
Scaffold-4.33	5984.89	4471.02	5612.84	6107.4	5787.13	5531.82	5713.56	6170.86	4767.29	protein_coding_gene	Scaffold-4	619252	631465	+	2309	-	- && P05303.2 RecName: Full=Elongation factor 1-alpha 2; Short=EF-1-alpha-2 && PF03143:Elongation factor Tu C-terminal domain|PF00009:Elongation factor Tu GTP binding domain|PF03144:Elongation factor Tu domain 2	GTP_EFTU
Scaffold-73.26	5339.66	4742.63	5293.9	8751.29	4707.09	5830.36	5827.85	5159.49	4160.24	protein_coding_gene	Scaffold-73	439828	445119	+	888	-	- && O96647.1 RecName: Full=60S ribosomal protein L10; AltName: Full=QM protein homolog && PF00252:Ribosomal protein L16p/L10e	-
Scaffold-17.198	5428.67	4411.66	5114.32	8891.81	4631.35	5391.17	5834.97	5210.67	4339.98	protein_coding_gene	Scaffold-17	4273967	4279161	+	411	-	- && P35979.2 RecName: Full=60S ribosomal protein L12 && PF00298:Ribosomal protein L11, RNA binding domain|PF03946:Ribosomal protein L11, N-terminal domain	-
Scaffold-60.36	5082.71	4470.86	5213.25	7533.52	4455.8	5483.5	5361.91	4504.02	4148.5	protein_coding_gene	Scaffold-60	866409	870239	+	366	-	- && Q9UNX3.1 RecName: Full=60S ribosomal protein L26-like 1 && PF16906:Ribosomal proteins L26 eukaryotic, L24P archaeal|PF00467:KOW motif	KOW
Scaffold-192.23	4091.47	4913.52	4086.93	5975.9	4618.5	6329.88	5598.96	5408.93	4578.6	protein_coding_gene	Scaffold-192	495409	508033	-	841	-	- && Q24756.1 RecName: Full=Myosin light chain alkali && -	-
Scaffold-133.73	4288.77	4142.51	4484.43	10549	3870.68	4790.85	5273.01	4225.21	3683.58	protein_coding_gene	Scaffold-133	1161218	1165023	+	541	-	- && P18101.2 RecName: Full=Ubiquitin-60S ribosomal protein L40; AltName: Full=CEP52; Contains: RecName: Full=Ubiquitin; Contains: RecName: Full=60S ribosomal protein L40; Flags: Precursor && PF01020:Ribosomal L40e family|PF00240:Ubiquitin family	ubiquitin
Scaffold-95.38	4328.68	3776.93	4139.37	8457.83	3999.94	4829.47	5189.68	4439.95	3757.46	protein_coding_gene	Scaffold-95	678523	683318	+	576	-	- && Q9XSU7.3 RecName: Full=60S ribosomal protein L27 && PF01777:Ribosomal L27e protein family	-
Scaffold-180.21	4318.28	3582.69	3897.17	10574.5	3731.12	4717.44	4663.27	3907.66	3404.48	protein_coding_gene	Scaffold-180	661924	666986	+	642	-	- && P14130.1 RecName: Full=40S ribosomal protein S14 >Q6XI08.1 RecName: Full=40S ribosomal protein S14a && PF00411:Ribosomal protein S11	-
Scaffold-107.23	4299.49	3803.03	3926.18	10028.8	3591.92	4376.45	4895.95	4118	3482.32	protein_coding_gene	Scaffold-107	571898	578113	-	669	-	- && P62844.2 RecName: Full=40S ribosomal protein S15; AltName: Full=RIG protein >P62845.2 RecName: Full=40S ribosomal protein S15; AltName: Full=RIG protein >P62841.2 RecName: Full=40S ribosomal protein S15; AltName: Full=RIG protein >P62842.2 RecName: Full=40S ribosomal protein S15; AltName: Full=RIG protein >P62843.2 RecName: Full=40S ribosomal protein S15; AltName: Full=RIG protein >P62846.2 …	-
Scaffold-73.77	4057.93	3654.85	4076.65	8729.91	3858.14	4726.41	4548.08	3836.42	3584.44	protein_coding_gene	Scaffold-73	1466159	1473756	+	776	-	- && P36241.2 RecName: Full=60S ribosomal protein L19 && PF01280:Ribosomal protein L19e	-
Scaffold-242.27	4559.32	3385.48	3799.59	8183.23	3794.09	4528.57	4867.01	4133.27	3678.16	protein_coding_gene	Scaffold-242	504488	514856	-	603	-	- && Q962T2.1 RecName: Full=60S ribosomal protein L28 [Spodoptera frugiperda] && PF01778:Ribosomal L28e protein family	-
Scaffold-113.37	4075.79	3154.94	3493.43	10309.5	3534.13	4442.23	4495.33	3586.97	3459.44	protein_coding_gene	Scaffold-113	953194	958943	-	496	-	- && P90702.3 RecName: Full=60S ribosomal protein L44 && PF00935:Ribosomal protein L44	-
Scaffold-12.169	4273.83	3665.49	3846.23	7504.45	3772.38	4402.48	5078.46	4153.89	3525.42	protein_coding_gene	Scaffold-12	3904593	3909789	+	742	-	- && P15357.2 RecName: Full=Ubiquitin-40S ribosomal protein S27a; Contains: RecName: Full=Ubiquitin; Contains: RecName: Full=40S ribosomal protein S27a; Flags: Precursor && PF00240:Ubiquitin family|PF01599:Ribosomal protein S27a	ubiquitin
Scaffold-71.54	3272.69	3627.17	2524.71	5894.66	4521.54	6541.26	4898.3	4339.94	4043.09	protein_coding_gene	Scaffold-71	757831	763017	-	747	-	- && - && PF15430:Single domain von Willebrand factor type C	-
Scaffold-219.15	4529.38	3712.91	4074.67	6277.44	4053.12	4791.15	4398.36	4208.94	3496.95	protein_coding_gene	Scaffold-219	214088	223603	-	1324	-	- && Q9U505.1 RecName: Full=ATP synthase lipid-binding protein, mitochondrial; AltName: Full=ATPase protein 9; AltName: Full=ATPase subunit c; Flags: Precursor && PF00137:ATP synthase subunit C	-
Scaffold-72.390	3569.25	3401.57	3717.32	8603.45	3382.72	4415.4	4220.33	3975.86	3170.63	protein_coding_gene	Scaffold-72	7370506	7379117	+	1113	-	- && Q0PXX8.1 RecName: Full=40S ribosomal protein SA && PF00318:Ribosomal protein S2|PF16122:40S ribosomal protein SA C-terminus	-
Scaffold-269.19	3739.13	3483.99	4023.26	7813.86	3696.11	4281.33	4015.68	3840.79	3222.24	protein_coding_gene	Scaffold-269	551459	559027	+	1070	-	- && O76190.1 RecName: Full=60S ribosomal protein L5 && PF14204:Ribosomal L18 C-terminal region|PF00861:Ribosomal L18p/L5e family	-
Scaffold-1.115	3924.71	3515.27	3873.15	8187.31	3357.13	4177.5	4353.1	3657.45	3042.42	protein_coding_gene	Scaffold-1	2060146	2067430	+	822	-	- && Q963B6.1 RecName: Full=60S ribosomal protein L10a && PF00687:Ribosomal protein L1p/L10e family	-
Scaffold-6.114	4098.48	2914.04	3646.66	7851.21	3409.19	4129.29	4816.34	3809.49	3183.43	protein_coding_gene	Scaffold-6	1962719	1966513	+	381	-	- && - && -	-
Scaffold-244.12	3804.59	3078.87	3358.85	9981.57	2961.71	3689.97	4272.12	3507.31	3037.29	protein_coding_gene	Scaffold-244	257254	263271	-	675	-	- && P55841.1 RecName: Full=60S ribosomal protein L14 && PF01929:Ribosomal protein L14	-
Scaffold-83.113	3716.46	3880.66	5006.01	2840.07	3758.11	3950.47	4526.92	5105.38	3656.41	protein_coding_gene	Scaffold-83	1318767	1339149	+	2079	-	- && - && -	-
Scaffold-567.7	3644.71	3260.16	4643.58	5704.02	3667.63	4177.82	3926.65	3925.11	3335.58	protein_coding_gene	Scaffold-567	199937	206084	+	1524	-	- && Q26365.4 RecName: Full=ADP,ATP carrier protein; AltName: Full=ADP/ATP translocase; AltName: Full=Adenine nucleotide translocator; Short=ANT; AltName: Full=Stress-sensitive protein B && PF00153:Mitochondrial carrier protein	Mito_carr
Scaffold-16.138	3950.62	3418.45	3334.17	5524.51	3651.38	4107.37	3967.8	4353.78	3215.48	protein_coding_gene	Scaffold-16	2936956	2944027	+	1941	-	- && Q9U639.1 RecName: Full=Heat shock 70 kDa protein cognate 4; Short=Hsc 70-4 && PF10712:NAD-specific glutamate dehydrogenase|PF00012:Hsp70 protein|PF00078:Reverse transcriptase (RNA-dependent DNA polymerase)	HSP70
Scaffold-8.164	3828.77	2941.8	3279.64	6332.67	3051.72	3895.77	4158.12	3449.56	3095.91	protein_coding_gene	Scaffold-8	2928764	2933138	-	504	-	- && P58374.1 RecName: Full=60S ribosomal protein L30 && PF01248:Ribosomal protein L7Ae/L30e/S12e/Gadd45 family	-
Scaffold-156.41	3396.72	2902	3216.16	7866.17	2981.69	3773.57	3758.96	3002.67	2741.29	protein_coding_gene	Scaffold-156	425399	433190	+	603	-	- && Q962Q6.1 RecName: Full=40S ribosomal protein S24 [Spodoptera frugiperda] && PF01282:Ribosomal protein S24e	Ribosomal_S24e
Scaffold-149.4	3583.55	2736.83	2855.24	7103.73	2983.21	3902.11	3741.17	3169.88	2897.52	protein_coding_gene	Scaffold-149	89719	95757	-	828	-	- && Q6PBC1.3 RecName: Full=60S ribosomal protein L35 && PF00831:Ribosomal L29 protein	-
Scaffold-303.21	3259.75	2583.15	3035.96	5866.86	2773.08	3379.94	3541.44	3230.94	2408.98	protein_coding_gene	Scaffold-303	232858	239530	+	750	-	- && Q4GXG7.1 RecName: Full=60S ribosomal protein L18 && -	-
Scaffold-15099.60	1553.61	3221.35	2436.24	5774.07	2309.81	3610.54	3486	3951.95	2512.4	protein_coding_gene	Scaffold-15099	704288	715882	-	906	-	- && - && -	-
Scaffold-208.7	3715.9	2445.04	3716.78	7085.7	1269.35	2891.21	2726.33	2697.86	1396.84	protein_coding_gene	Scaffold-208	288713	291185	+	930	-	- && - && -	-
Scaffold-11.129	2833.13	2503.62	2715	5843.32	2533.26	3071.09	3164.29	2691.31	2346.89	protein_coding_gene	Scaffold-11	2544011	2559224	+	1269	-	- && P46222.2 RecName: Full=60S ribosomal protein L11 && PF00673:ribosomal L5P family C-terminus|PF00069:Protein kinase domain|PF00281:Ribosomal protein L5	Pkinase
Scaffold-20.299	5232.84	2853.63	2936.39	5307.25	3495.23	1276.45	2811.76	1410.73	2245.69	protein_coding_gene	Scaffold-20	7551494	7561841	+	6119	-	- && Q16927.2 RecName: Full=Vitellogenin-A1; Short=VG; AltName: Full=PVG1; Contains: RecName: Full=Vitellin light chain; Short=VL; Contains: RecName: Full=Vitellin heavy chain; Short=VH; Flags: Precursor && PF09172:Domain of unknown function (DUF1943)|PF01347:Lipoprotein amino terminal region|PF00094:von Willebrand factor type D domain	Vitellogenin_N
Scaffold-52.151	2858.95	2351.74	2680.44	5991.53	2533.01	3131.79	3030.96	2654.12	2289.65	protein_coding_gene	Scaffold-52	2077589	2083469	-	618	-	- && P80455.2 RecName: Full=40S ribosomal protein S12 && PF01248:Ribosomal protein L7Ae/L30e/S12e/Gadd45 family	-
Scaffold-39.22	2869.01	2375.37	2575	5414.75	2480.31	3174.77	3211.78	2864	2234.86	protein_coding_gene	Scaffold-39	510997	514885	+	751	-	- && P39018.3 RecName: Full=40S ribosomal protein S19a && PF01090:Ribosomal protein S19e	-
Scaffold-426.24	2787.5	2392.58	2673.52	5059.59	2554.85	3205.42	3156.55	2827.71	2196.56	protein_coding_gene	Scaffold-426	398054	398663	+	610	-	- && P48159.2 RecName: Full=60S ribosomal protein L23; AltName: Full=L17A && PF00238:Ribosomal protein L14p/L23e	-
Scaffold-133.8	2466.67	2437.66	2851.45	6518.25	2474.55	2211.04	3009.13	2624.84	2235.07	protein_coding_gene	Scaffold-133	198569	209994	+	657	-	- && - && PF13891:Potential DNA-binding domain	-
Scaffold-45.45	2523.33	2124.28	2349.44	6468.9	2213.99	2784.4	2892.09	2543.93	2003.24	protein_coding_gene	Scaffold-45	982261	1000736	-	1668	-	- && P08570.2 RecName: Full=60S acidic ribosomal protein P1; AltName: Full=Acidic ribosomal protein RPA2; AltName: Full=RP21C && PF00428:60s Acidic ribosomal protein	-
Scaffold-17.171	1731.18	2400.36	2559.77	3641.7	2714.38	3143.77	3454.63	3404.55	2418.36	protein_coding_gene	Scaffold-17	3618781	3626255	-	555	-	- && - && -	-
Scaffold-44.9	4226.31	2840.97	3225.45	2357.59	2395.73	2485.84	2428.05	2522.97	2161.01	protein_coding_gene	Scaffold-44	148431	151618	+	536	-	- && P41509.2 RecName: Full=Fatty acid-binding protein, muscle; AltName: Full=M-FABP && PF00061:Lipocalin / cytosolic fatty-acid binding protein family	-
Scaffold-95.85	3036.18	2251.95	3107.57	2562.69	2445.9	2288.72	2961.06	3031.12	2009.3	protein_coding_gene	Scaffold-95	1529498	1537582	+	2097	-	- && O44104.2 RecName: Full=Glyceraldehyde-3-phosphate dehydrogenase 2; AltName: Full=Glyceraldehyde-3-phosphate dehydrogenase II; Short=GAPDH II && PF00589:Phage integrase family|PF00044:Glyceraldehyde 3-phosphate dehydrogenase, NAD binding domain|PF02800:Glyceraldehyde 3-phosphate dehydrogenase, C-terminal domain	Phage_integrase
Scaffold-77.66	2243.29	2217.86	2233.74	4152.06	2218.05	2756.77	2860.79	2327.37	2071.04	protein_coding_gene	Scaffold-77	1057146	1065519	+	730	-	- && P84029.2 RecName: Full=Cytochrome c-2; AltName: Full=Cytochrome c-proximal >P84030.2 RecName: Full=Cytochrome c-2 && PF00034:Cytochrome c	-
Scaffold-71.87	2401.28	2101.44	2316.65	4477.31	2151.73	2603.99	2565.92	2258	1983.3	protein_coding_gene	Scaffold-71	1622552	1642122	-	1620	-	- && Q5G5C4.1 RecName: Full=40S ribosomal protein S3a && PF01015:Ribosomal S3Ae family	-
Scaffold-118.165	2275.06	2004.27	2325.63	3859.52	2093.34	2335.15	2422.9	2287.78	1975.65	protein_coding_gene	Scaffold-118	2348004	2380036	-	1590	-	- && P62752.1 RecName: Full=60S ribosomal protein L23a >P62750.1 RecName: Full=60S ribosomal protein L23a >P62751.1 RecName: Full=60S ribosomal protein L23a >Q24JY1.1 RecName: Full=60S ribosomal protein L23a && PF00276:Ribosomal protein L23|PF03939:Ribosomal protein L23, N-terminal domain|PF06110:Eukaryotic protein of unknown function (DUF953)	-
Scaffold-66.23	2130.82	1775.52	1951.24	4416.25	1767.77	2388.42	2418.04	2111.76	1723.66	protein_coding_gene	Scaffold-66	505919	511511	-	656	-	- && P62866.1 RecName: Full=40S ribosomal protein S30 >P62867.1 RecName: Full=40S ribosomal protein S30 >P62863.1 RecName: Full=40S ribosomal protein S30 >P62864.1 RecName: Full=40S ribosomal protein S30 >P62860.1 RecName: Full=40S ribosomal protein S30 >P62861.1 RecName: Full=40S ribosomal protein S30 >P62862.1 RecName: Full=40S ribosomal protein S30 >P0C2F0.1 RecName: Full=40S ribosomal protein…	Ribosomal_S30
Scaffold-583.6	1560.2	1848.11	3468.81	2742.97	2283.13	2948.67	1530.45	2193.1	1988.77	protein_coding_gene	Scaffold-583	145001	146525	+	1525	-	- && - && -	-
Scaffold-208.6	3690.21	1074.01	1576.81	6259.21	1120.22	2332.78	1320.19	1172.46	1322.99	protein_coding_gene	Scaffold-208	260824	279285	-	1468	-	- && - && -	-
Scaffold-464.10	2139.78	1858.4	1904.87	3523.3	1876.13	2371.14	2289.09	2126.01	1620.69	protein_coding_gene	Scaffold-464	190035	199756	-	1146	-	- && O18640.2 RecName: Full=Guanine nucleotide-binding protein subunit beta-like protein; AltName: Full=Receptor of activated protein kinase C homolog && PF00400:WD domain, G-beta repeat	WD40
Scaffold-33.12	1343.57	1651.89	1336.72	611.927	3450.79	3492.03	2548.06	2700.4	2490.93	protein_coding_gene	Scaffold-33	110989	113905	+	905	-	- && P82119.1 RecName: Full=Cuticle protein 6; AltName: Full=BcNCP14.9 [Blaberus craniifer] && PF00379:Insect cuticle protein	Chitin_bind_4
Scaffold-302.8	2035.44	1767.35	1925.89	3463.86	1817.63	2211.09	2214.58	1993.3	1633.46	protein_coding_gene	Scaffold-302	131353	156845	+	1671	-	- && P46782.4 RecName: Full=40S ribosomal protein S5; Contains: RecName: Full=40S ribosomal protein S5, N-terminally processed >Q5E988.3 RecName: Full=40S ribosomal protein S5; Contains: RecName: Full=40S ribosomal protein S5, N-terminally processed && PF00177:Ribosomal protein S7p/S5e	-
Scaffold-415.4	1713.15	1831.9	1524.18	3600.74	1926.99	2154.19	2426.38	2037.66	1585.92	protein_coding_gene	Scaffold-415	41513	47272	-	882	-	- && P13008.1 RecName: Full=40S ribosomal protein S26; Short=DS31 && PF01283:Ribosomal protein S26e	-
Scaffold-81.55	2212.4	1782.98	2024.04	3143.91	1771.73	2047.92	2079.89	1804.94	1450.34	protein_coding_gene	Scaffold-81	1439680	1442814	+	1059	-	- && P08879.3 RecName: Full=Nucleoside diphosphate kinase; Short=NDK; Short=NDP kinase; AltName: Full=Abnormal wing disks protein; AltName: Full=Killer of prune protein && PF00334:Nucleoside diphosphate kinase	NDK
Scaffold-422.7	1694.81	1837.36	2057.01	3317.71	1820.32	1963.81	2119.75	1815.11	1483.81	protein_coding_gene	Scaffold-422	151439	159387	-	601	-	- && Q962R1.1 RecName: Full=40S ribosomal protein S18 && PF00416:Ribosomal protein S13/S18	-
Scaffold-16.77	2021.87	1613.12	1838.95	3238.31	1244.33	1669.14	2165.65	2387.93	1898.96	protein_coding_gene	Scaffold-16	1602745	1603152	+	408	-	- && - && PF06140:Interferon-induced 6-16 family	-
Scaffold-197.45	2087.76	1941.71	2117.07	1626.15	2062.07	2120.04	2056.63	2197.47	1824.94	protein_coding_gene	Scaffold-197	827213	836913	-	1656	-	- && P35381.2 RecName: Full=ATP synthase subunit alpha, mitochondrial; AltName: Full=Protein bellwether; Flags: Precursor && PF00006:ATP synthase alpha/beta family, nucleotide-binding domain|PF00306:ATP synthase alpha/beta chain, C terminal domain|PF02874:ATP synthase alpha/beta family, beta-barrel domain	ATP-synt_ab
Scaffold-273.1	2022.95	1433.95	1430.04	3906.27	1611.44	1995.54	2154.23	1726.56	1638.17	protein_coding_gene	Scaffold-273	718	6300	+	426	-	- && P80977.2 RecName: Full=Cytochrome c oxidase subunit 6C-1; AltName: Full=Cytochrome c oxidase polypeptide VIc-1 && PF02937:Cytochrome c oxidase subunit VIc	-
Scaffold-63.36	2755.79	1392.12	2124.41	2142.92	1916.45	1517.12	2641.54	2086.64	1186.09	protein_coding_gene	Scaffold-63	700031	707183	+	2339	-	- && Q9Y234.1 RecName: Full=Lipoyltransferase 1, mitochondrial; AltName: Full=Lipoate biosynthesis protein; AltName: Full=Lipoate-protein ligase; AltName: Full=Lipoyl ligase; Flags: Precursor && -	-
Scaffold-498.2	1848.84	1501.82	1679.59	3787.66	1624.6	1901.91	2017.92	1732.47	1474.36	protein_coding_gene	Scaffold-498	34654	54837	-	1620	-	- && P62909.1 RecName: Full=40S ribosomal protein S3 >P62908.1 RecName: Full=40S ribosomal protein S3 >E2RH47.1 RecName: Full=40S ribosomal protein S3 && PF00189:Ribosomal protein S3, C-terminal domain|PF16064:Domain of unknown function (DUF4806)|PF07650:KH domain	-
Scaffold-4212.1	2311.25	1199.73	2120.95	5393.25	853.67	905.408	2695.76	1068.9	921.708	protein_coding_gene	Scaffold-4212	1899	2317	-	419	-	- && - && -	-
Scaffold-3.45	1858.37	1644.95	1725.79	3662.19	1620.89	1839.32	1965.84	1698.29	1424.18	protein_coding_gene	Scaffold-3	791492	800218	+	1174	-	- && P29522.2 RecName: Full=Elongation factor 1-beta' && PF10587:Eukaryotic elongation factor 1 beta central acidic region|PF00736:EF-1 guanine nucleotide exchange domain|PF00628:PHD-finger	PHD
Scaffold-476.12	1791.56	1404.57	1581.02	4473.31	1506.77	1872.33	1848.19	1633.14	1319.27	protein_coding_gene	Scaffold-476	199010	223236	-	1884	-	- && Q5MGD1.1 RecName: Full=60S ribosomal protein L17 && PF00237:Ribosomal protein L22p/L17e|PF02893:GRAM domain	GRAM
Scaffold-169.25	1917.52	1405.08	1571.15	3891.59	1420.73	2008.15	2048.37	1619.78	1449.76	protein_coding_gene	Scaffold-169	524645	526702	+	463	-	- && Q5RFH0.1 RecName: Full=ATP synthase subunit g, mitochondrial; Short=ATPase subunit g && PF04718:Mitochondrial ATP synthase g subunit	-
Scaffold-616.3	1675.08	1491.65	1714.95	3646.08	1599.32	1900.4	1875.19	1834.31	1421.52	protein_coding_gene	Scaffold-616	43384	64219	+	1485	-	- && P18077.2 RecName: Full=60S ribosomal protein L35a; AltName: Full=Cell growth-inhibiting gene 33 protein >P61272.1 RecName: Full=60S ribosomal protein L35a >Q5R8K6.1 RecName: Full=60S ribosomal protein L35a && PF00638:RanBP1 domain|PF01247:Ribosomal protein L35Ae	-
Scaffold-14.63	2063.02	1567.09	1631.84	2848.51	1716	1873.3	1959.38	1735.51	1563.92	protein_coding_gene	Scaffold-14	1343635	1350130	-	1539	-	- && P42577.2 RecName: Full=Soma ferritin && PF00210:Ferritin-like domain	Ferritin
Scaffold-194.29	1906.09	2084.71	1868.57	1549.98	2203.23	1715.48	1844.87	2035.9	1577.59	protein_coding_gene	Scaffold-194	626109	631732	-	897	-	- && Q26365.4 RecName: Full=ADP,ATP carrier protein; AltName: Full=ADP/ATP translocase; AltName: Full=Adenine nucleotide translocator; Short=ANT; AltName: Full=Stress-sensitive protein B && PF00153:Mitochondrial carrier protein	Mito_carr
Scaffold-31.128	2190.34	1445.4	2080.92	4109.53	1118.52	1325.77	1993.69	1279.18	1102.83	protein_coding_gene	Scaffold-31	2427691	2456616	+	2502	-	- && - && -	-
Scaffold-248.8	1682.24	1544.54	1785.82	3153.11	1635.12	1810.44	1785.8	1760.59	1395.99	protein_coding_gene	Scaffold-248	87849	106476	+	2745	-	- && P09180.2 RecName: Full=60S ribosomal protein L4; AltName: Full=L1 && PF14374:60S ribosomal protein L4 C-terminal domain|PF00573:Ribosomal protein L4/L1 family	-
Scaffold-15099.76	1175.58	1467.15	632.092	746.305	1963.26	3109.68	3414.09	1993.26	2030.97	protein_coding_gene	Scaffold-15099	994959	998533	-	449	-	- && - && -	-
Scaffold-450.13	1727.02	1619.68	1714.98	2537.92	1713.83	1884.03	1650.89	1785.36	1726.72	protein_coding_gene	Scaffold-450	174663	179960	+	1512	-	- && P06603.1 RecName: Full=Tubulin alpha-1 chain && PF00091:Tubulin/FtsZ family, GTPase domain|PF03953:Tubulin C-terminal domain	Tubulin
Scaffold-21.40	1536.96	1729.28	1702.36	1473.25	1690.39	2245.8	1816.66	1947.68	1774.98	protein_coding_gene	Scaffold-21	713506	743273	-	2039	-	- && P19351.3 RecName: Full=Troponin T, skeletal muscle; AltName: Full=Protein intended thorax; AltName: Full=Protein upheld && PF00992:Troponin	-
Scaffold-20.291	1659.8	1653.18	1768.62	2435.13	1649.12	1891.96	1762.21	1528.43	1471.31	protein_coding_gene	Scaffold-20	7443333	7447198	+	366	-	- && - && PF02320:Ubiquinol-cytochrome C reductase hinge protein	-
Scaffold-151.14	1649.69	1348.6	1437.73	2970.81	1443.46	1732.93	1935.97	1536.63	1265.57	protein_coding_gene	Scaffold-151	205682	208187	-	454	-	- && - && -	-
Scaffold-11.150	1444.04	1333.88	1457.09	2787.2	1275.94	1549.48	1713.18	1447.72	1264.74	protein_coding_gene	Scaffold-11	2943896	2957743	+	1764	-	- && Q8WQI7.1 RecName: Full=60S ribosomal protein L18a && PF01775:Ribosomal L18ae/LX protein domain	-
Scaffold-72.503	1725.86	1730.74	1824.84	928.741	1529.62	1500.66	1504.71	1629.97	1423.66	protein_coding_gene	Scaffold-72	9914598	9929470	+	1465	-	- && Q8RXU4.1 RecName: Full=Probable low-specificity L-threonine aldolase 1; AltName: Full=Threonine aldolase 1 && PF01212:Beta-eliminating lyase	Beta_elim_lyase
Scaffold-490.21	1211.71	1491.04	1499.66	1635.36	1421.13	1863.79	1576.5	1561.38	1429.51	protein_coding_gene	Scaffold-490	298180	338861	+	1854	-	- && P36188.3 RecName: Full=Troponin I; Short=Tn I; AltName: Full=Protein heldup; AltName: Full=Protein wings apart-A && PF00992:Troponin	-
Scaffold-49.40	1552.87	1363.73	1431.39	1608.22	1498.32	1608.99	1476.04	1529.87	1448.27	protein_coding_gene	Scaffold-49	1098026	1105929	+	2055	-	- && O17449.1 RecName: Full=Tubulin beta-1 chain; AltName: Full=Beta-1-tubulin && PF03953:Tubulin C-terminal domain|PF00091:Tubulin/FtsZ family, GTPase domain	Tubulin
Scaffold-601.1	604.742	1350.59	1435.16	1486.92	2225.46	2052.89	1367.25	1174.28	1563.83	protein_coding_gene	Scaffold-601	31517	46794	-	725	-	- && Q7M4F0.1 RecName: Full=Endocuticle structural glycoprotein SgAbd-9 && PF00379:Insect cuticle protein	Chitin_bind_4
Scaffold-41.4	1317.54	1238.11	1299.39	2380.41	1763.52	1410.66	1245.44	1499.52	1031.5	protein_coding_gene	Scaffold-41	196769	200593	-	435	-	- && - && -	-
Scaffold-401.6	5864.94	553.119	151.68	1033.93	2652.75	1443.4	240.012	163.905	890.812	protein_coding_gene	Scaffold-401	51998	61893	-	1033	-	- && - && -	-
Scaffold-51.63	1261.34	1224.07	1478.47	2407.31	1250.28	1479.46	1413.95	1321.73	1129.05	protein_coding_gene	Scaffold-51	1463573	1509469	+	3951	-	- && P19889.1 RecName: Full=60S acidic ribosomal protein P0; AltName: Full=Apurinic-apyrimidinic endonuclease; AltName: Full=DNA-(apurinic or apyrimidinic site) lyase && PF00466:Ribosomal protein L10|PF00428:60s Acidic ribosomal protein|PF05380:Pao retrotransposon peptidase	-
Scaffold-61.45	1389.49	1068.55	1114.08	2720.78	1167.34	1454.76	1523.67	1201.18	1159.76	protein_coding_gene	Scaffold-61	861953	878066	-	1788	-	- && Q8WRF3.1 RecName: Full=60S ribosomal protein L32; AltName: Full=Ribosomal protein 49 && PF01655:Ribosomal protein L32|PF00858:Amiloride-sensitive sodium channel	-
Scaffold-684.4	1260.45	1042.76	1034.61	2732.91	1128.77	1651.88	1639.23	1239.57	1035.29	protein_coding_gene	Scaffold-684	77450	89254	-	1298	-	- && O16797.3 RecName: Full=60S ribosomal protein L3 && PF00297:Ribosomal protein L3	-
Scaffold-8.167	1723.17	1255.05	1395.58	1190.16	1218.75	1932.15	1432.76	1436.67	1125.34	protein_coding_gene	Scaffold-8	2960729	2990606	-	2391	-	- && P35362.1 RecName: Full=Rhodopsin; Short=Opsin [Sphodromantis sp.] && PF07776:Zinc-finger associated domain (zf-AD)|PF00001:7 transmembrane receptor (rhodopsin family)	7tm_1
Scaffold-1.113	1317.94	1144.44	1151.33	1943.76	1587.77	1722.55	1177.16	1476.41	1109.17	protein_coding_gene	Scaffold-1	2002309	2007635	+	1255	-	- && P14318.2 RecName: Full=Muscle-specific protein 20 && PF00307:Calponin homology (CH) domain|PF00402:Calponin family repeat	CH
Scaffold-20.302	1171.32	1159.74	978.396	4834.63	1561.18	567.774	689.848	568.992	1064.89	protein_coding_gene	Scaffold-20	7592503	7643868	+	3205	-	- && Q868N5.1 RecName: Full=Vitellogenin; Flags: Precursor && PF01347:Lipoprotein amino terminal region|PF00094:von Willebrand factor type D domain	Vitellogenin_N
Scaffold-553.1	3124.03	1162.83	1231.39	789.831	1141.34	658.082	2495.3	1109.61	712.308	protein_coding_gene	Scaffold-553	21881	45567	+	2414	-	- && A5A6P1.1 RecName: Full=D-3-phosphoglycerate dehydrogenase; Short=3-PGDH && PF00389:D-isomer specific 2-hydroxyacid dehydrogenase, catalytic domain|PF02826:D-isomer specific 2-hydroxyacid dehydrogenase, NAD binding domain	2-Hacid_dh_C
Scaffold-21.97	1268.55	1456.96	1383.37	852.557	1370.36	1618.89	1437.69	1450.75	1482.72	protein_coding_gene	Scaffold-21	1968118	1998594	+	1421	-	- && Q24400.1 RecName: Full=Muscle LIM protein Mlp84B && PF00412:LIM domain	LIM
Scaffold-231.25	708.642	1438.17	1375.26	2264.42	1257.32	1687.05	1193.36	1366.45	1012.71	protein_coding_gene	Scaffold-231	313471	322457	+	1099	-	- && - && -	-
Scaffold-87.27	1214.68	1044.6	1203.91	2688.97	1107.94	1321.48	1350.31	1177.38	1061.2	protein_coding_gene	Scaffold-87	615998	663616	-	3163	-	- && Q9W1L5.2 RecName: Full=Peptidyl-alpha-hydroxyglycine alpha-amidating lyase 2; AltName: Full=Peptidylamidoglycolate lyase 2; Short=dPAL2; Flags: Precursor && PF13873:Myb/SANT-like DNA-binding domain|PF01294:Ribosomal protein L13e|PF00651:BTB/POZ domain	BTB
Scaffold-205.12	1365.65	1198.59	1238.68	1506.22	1219.92	1387.08	1422.91	1275.05	1109.26	protein_coding_gene	Scaffold-205	212646	223488	+	1309	-	- && O01666.2 RecName: Full=ATP synthase subunit gamma, mitochondrial; AltName: Full=F-ATPase gamma subunit; Flags: Precursor && PF00231:ATP synthase	-
Scaffold-79.53	1229.09	1149.03	1324.99	1646.75	1293.42	1280.17	1274.24	1405.03	1112.85	protein_coding_gene	Scaffold-79	944840	987003	-	5415	-	- && Q1HPK6.1 RecName: Full=Translation elongation factor 2; Short=EF-2 && PF00679:Elongation factor G C-terminus|PF14492:Elongation Factor G, domain II|PF03144:Elongation factor Tu domain 2|PF00009:Elongation factor Tu GTP binding domain|PF13913:zinc-finger of a C2HC-type|PF03764:Elongation factor G, domain IV	GTP_EFTU
Scaffold-1806.2	1292.01	796.154	686.232	2725.82	755.125	1570.93	1465.18	1347.63	1057.17	protein_coding_gene	Scaffold-1806	14466	16658	-	409	-	- && Q86FP7.1 RecName: Full=40S ribosomal protein S23 && PF00164:Ribosomal protein S12/S23	Ribosomal_S12
Scaffold-27.100	1241.37	1083.43	1405.12	1731.02	1149.97	1362.86	1292.23	1452.87	882.255	protein_coding_gene	Scaffold-27	2160811	2196360	+	2964	-	- && Q9D4D4.1 RecName: Full=Transketolase-like protein 2 && PF00078:Reverse transcriptase (RNA-dependent DNA polymerase)|PF02779:Transketolase, pyrimidine binding domain|PF00456:Transketolase, thiamine diphosphate binding domain|PF02780:Transketolase, C-terminal domain	RVT_1
Scaffold-33.21	702.109	1291.52	804.173	844.036	1592.21	1806.84	1479.24	1338.98	1619.41	protein_coding_gene	Scaffold-33	202712	211085	-	1233	-	- && - && -	-
Scaffold-43.81	1130.74	1018.82	1212.18	2026.96	1050.41	1364.3	1497.65	1141.56	1033.7	protein_coding_gene	Scaffold-43	1573440	1574277	+	483	-	- && - && -	-
Scaffold-338.14	1201.25	1063.06	1263.53	2142.48	1103.37	1225.95	1300.63	1169.68	968.282	protein_coding_gene	Scaffold-338	264639	293794	-	3768	-	- && P60517.1 RecName: Full=Gamma-aminobutyric acid receptor-associated protein; AltName: Full=GABA(A) receptor-associated protein; Flags: Precursor >O95166.1 RecName: Full=Gamma-aminobutyric acid receptor-associated protein; AltName: Full=GABA(A) receptor-associated protein; AltName: Full=MM46; Flags: Precursor >Q8MK68.1 RecName: Full=Gamma-aminobutyric acid receptor-associated protein; AltName:…	RVT_1
Scaffold-57.83	1200.87	970.694	1058.38	2303.85	1064.13	1308.53	1279.4	1071.75	981.068	protein_coding_gene	Scaffold-57	1948851	1953808	+	691	-	- && Q24407.1 RecName: Full=ATP synthase-coupling factor 6, mitochondrial; Short=ATPase subunit F6; Flags: Precursor && PF05511:Mitochondrial ATP synthase coupling factor 6	-
Scaffold-95.56	1623.69	983.982	1226.63	1373.8	1030.56	1204.31	1691.79	1226.09	812.974	protein_coding_gene	Scaffold-95	1049291	1083955	-	2646	-	- && P53396.3 RecName: Full=ATP-citrate synthase; AltName: Full=ATP-citrate (pro-S-)-lyase; Short=ACL; AltName: Full=Citrate cleavage enzyme && PF00285:Citrate synthase|PF00549:CoA-ligase	Citrate_synt
Scaffold-328.6	2864.3	925.934	1157.18	1214.55	1167.92	799.935	1470.63	968.699	572.457	protein_coding_gene	Scaffold-328	88270	105591	+	1752	-	- && Q6US81.1 RecName: Full=Acyl-CoA Delta(11) desaturase; AltName: Full=Acyl-CoA Delta-11 desaturase; Short=Delta(11)-desaturase; AltName: Full=SlsZ/E11 && PF00487:Fatty acid desaturase	-
Scaffold-151.45	1310.35	983.573	1134.03	1650.51	1097.68	1329.78	1240.3	1225.32	926.404	protein_coding_gene	Scaffold-151	864347	871558	-	1123	-	- && Q94516.2 RecName: Full=ATP synthase subunit b, mitochondrial; Short=ATPase subunit b; AltName: Full=FO-ATP synthase subunit b; Flags: Precursor && PF05405:Mitochondrial ATP synthase B chain precursor (ATP-synt_B)	-
Scaffold-42.89	1105.07	1324.22	1423.26	1174.7	1092.3	1132.85	1074.52	1301.85	1187.13	protein_coding_gene	Scaffold-42	1595342	1611924	+	1452	-	- && P91798.1 RecName: Full=Arginine kinase; Short=AK && PF00217:ATP:guanido phosphotransferase, C-terminal catalytic domain|PF02807:ATP:guanido phosphotransferase, N-terminal domain	-
Scaffold-283.24	1440.55	896.409	1209.07	1482.58	1198.61	1092.16	1551.42	1089.76	837.822	protein_coding_gene	Scaffold-283	474795	478468	+	826	-	- && - && PF02221:ML domain	-
Scaffold-304.32	5689.98	601.163	162.64	423.591	1543.38	1406.11	239.471	57.471	624.661	protein_coding_gene	Scaffold-304	361299	367360	-	1002	-	- && - && -	-
Scaffold-20.301	1615.66	792.314	834.52	3755.54	1044.68	472.323	1011.52	443.54	686.877	protein_coding_gene	Scaffold-20	7573284	7589806	+	5847	-	- && Q9U8M0.1 RecName: Full=Vitellogenin-1; Short=Vg-1; Flags: Precursor && PF01347:Lipoprotein amino terminal region|PF09172:Domain of unknown function (DUF1943)|PF00094:von Willebrand factor type D domain	Vitellogenin_N
Scaffold-24.261	1098.3	869.659	960.368	2444.3	934.534	1146.33	1249.79	980.018	876.274	protein_coding_gene	Scaffold-24	6594900	6632645	-	2322	-	- && Q4V8X0.1 RecName: Full=Transmembrane protein adipocyte-associated 1 homolog; AltName: Full=Integral membrane protein GPR175 && PF16205:Ribosomal_S17 N-terminal|PF00366:Ribosomal protein S17|PF10160:Predicted membrane protein	-
Scaffold-5.125	1311.55	937.33	900.955	2226.19	909.412	1045.18	1123.6	916.952	995.814	protein_coding_gene	Scaffold-5	2670293	2688640	+	618	-	- && Q9VXN2.1 RecName: Full=Protein stunted && PF04627:Mitochondrial ATP synthase epsilon chain	-
Scaffold-3.26	995.203	908.864	1030.98	1707.75	1107.31	1187.17	1102.61	1007.5	1042.41	protein_coding_gene	Scaffold-3	455959	472641	-	2316	-	- && P62924.1 RecName: Full=Eukaryotic translation initiation factor 5A; Short=eIF-5A >P62925.1 RecName: Full=Eukaryotic translation initiation factor 5A; Short=eIF-5A && PF01287:Eukaryotic elongation factor 5A hypusine, DNA-binding OB fold	-
Scaffold-5.166	1274.59	1028.44	1037.51	1840.27	862.086	1201.05	1144.75	981.792	694.314	protein_coding_gene	Scaffold-5	3596823	3605228	-	736	-	- && Q9W1C9.2 RecName: Full=Ejaculatory bulb-specific protein 3; AltName: Full=Ejaculatory bulb-specific protein III; AltName: Full=PEB-meIII; AltName: Full=PEBmelIII; Flags: Precursor && PF03392:Insect pheromone-binding family, A10/OS-D	-
Scaffold-108.6	974.779	1205.31	1192.64	417.639	1153.58	1250.13	1193.81	1280.3	1315.45	protein_coding_gene	Scaffold-108	69326	174306	-	1273	-	- && Q8T6L5.1 RecName: Full=Tropomyosin && PF00261:Tropomyosin	-
Scaffold-53.98	1394.19	1286.87	989.909	883.641	499.307	656.324	2708.56	897.546	618.99	protein_coding_gene	Scaffold-53	1932550	1934736	+	444	-	- && - && -	-
Scaffold-758.1	1523.73	1032.48	1441.14	996.066	985.12	741.703	1322.16	979.491	769.382	protein_coding_gene	Scaffold-758	1989	13710	-	1553	-	- && Q6US81.1 RecName: Full=Acyl-CoA Delta(11) desaturase; AltName: Full=Acyl-CoA Delta-11 desaturase; Short=Delta(11)-desaturase; AltName: Full=SlsZ/E11 && PF00487:Fatty acid desaturase	-
Scaffold-201.15	995.538	1049.97	898.173	1000.36	1018.83	1334.4	1090.6	1200.79	1091.24	protein_coding_gene	Scaffold-201	405177	447588	-	3814	-	- && P35415.1 RecName: Full=Paramyosin, long form && PF01576:Myosin tail	Myosin_tail_1
Scaffold-26.136	1437.45	1072.61	1095.78	826.603	1120.07	979.029	1083.26	1062.78	884.63	protein_coding_gene	Scaffold-26	2644510	2658912	-	744	-	- && Q2F637.2 RecName: Full=14-3-3 protein zeta && PF00244:14-3-3 protein	-
Scaffold-449.17	1113.77	978.098	1108.67	958.535	1048.5	1140.59	1071.35	1153.56	933.415	protein_coding_gene	Scaffold-449	347511	359919	-	2246	-	- && Q05825.3 RecName: Full=ATP synthase subunit beta, mitochondrial; Flags: Precursor && PF00306:ATP synthase alpha/beta chain, C terminal domain|PF00006:ATP synthase alpha/beta family, nucleotide-binding domain|PF02874:ATP synthase alpha/beta family, beta-barrel domain	ATP-synt_ab
Scaffold-78.56	1079.44	705.585	724.994	1885.4	817.862	1104.11	1176.48	909.764	942.661	protein_coding_gene	Scaffold-78	1137225	1155397	-	1602	-	- && Q6F450.1 RecName: Full=60S ribosomal protein L38 && PF00078:Reverse transcriptase (RNA-dependent DNA polymerase)|PF01781:Ribosomal L38e protein family	RVT_1
Scaffold-265.21	986.562	1216.51	1230.79	818.993	757.045	901.745	1117.74	968.783	1062.95	protein_coding_gene	Scaffold-265	548197	564094	-	2508	-	- && B2D0J5.1 RecName: Full=Venom carboxylesterase-6; AltName: Allergen=Api m 8; Flags: Precursor && PF00135:Carboxylesterase family	COesterase
Scaffold-271.14	871.942	895.304	927.641	2025.86	734.718	805.346	1265.68	745.829	657.242	protein_coding_gene	Scaffold-271	190107	207541	-	1713	-	- && Q9VBV3.1 RecName: Full=Protein takeout; Flags: Precursor && PF06585:Haemolymph juvenile hormone binding protein (JHBP)	-
Scaffold-6.136	1121.71	726.48	846.817	1750.27	827.678	1078.27	992.236	884.498	692.298	protein_coding_gene	Scaffold-6	2289461	2301712	-	852	-	- && - && -	-
Scaffold-72.55	890.15	761.265	792.244	2016.21	788.998	1009.04	1002.44	851.907	721.598	protein_coding_gene	Scaffold-72	944297	969156	+	3078	-	- && Q91W36.1 RecName: Full=Ubiquitin carboxyl-terminal hydrolase 3; AltName: Full=Deubiquitinating enzyme 3; AltName: Full=Ubiquitin thioesterase 3; AltName: Full=Ubiquitin-specific-processing protease 3 && PF00443:Ubiquitin carboxyl-terminal hydrolase|PF02148:Zn-finger in ubiquitin-hydrolases and other protein|PF00833:Ribosomal S17|PF00078:Reverse transcriptase (RNA-dependent DNA polymerase)	UCH
Scaffold-1024.1	864.296	677.155	1028.11	1271.41	846.905	965.275	1068.46	1057.08	891.785	protein_coding_gene	Scaffold-1024	1797	33462	-	2428	-	- && Q17GM7.1 RecName: Full=Probable citrate synthase 1, mitochondrial; Flags: Precursor && PF00285:Citrate synthase	Citrate_synt
Scaffold-59.99	837.88	750.913	785.381	1831.73	867.832	1259.17	843.468	792.619	680.651	protein_coding_gene	Scaffold-59	1830222	1838972	+	1063	-	- && P07477.1 RecName: Full=Trypsin-1; AltName: Full=Beta-trypsin; AltName: Full=Cationic trypsinogen; AltName: Full=Serine protease 1; AltName: Full=Trypsin I; Contains: RecName: Full=Alpha-trypsin chain 1; Contains: RecName: Full=Alpha-trypsin chain 2; Flags: Precursor && PF00089:Trypsin	Trypsin
Scaffold-17.195	954.212	759.989	884.242	1394.37	1008.02	1026.57	900.59	955.918	758.207	protein_coding_gene	Scaffold-17	4228357	4246106	-	1885	-	- && Q08473.3 RecName: Full=RNA-binding protein squid; AltName: Full=Heterogeneous nuclear ribonucleoprotein 40; Short=HNRNP 40 && PF00076:RNA recognition motif. (a.k.a. RRM, RBD, or RNP domain)	RRM_1
Scaffold-119.33	860.466	961.153	1128.67	576.971	1094.51	1053.94	844.863	1104.1	949.305	protein_coding_gene	Scaffold-119	669682	687397	+	2265	-	- && P16854.1 RecName: Full=Esterase B1; Flags: Precursor && PF00135:Carboxylesterase family	COesterase
Scaffold-458.8	842.945	802.173	924.48	1624.15	806.826	1070.92	974.111	816.355	678.659	protein_coding_gene	Scaffold-458	145107	152247	+	850	-	- && Q94901.1 RecName: Full=RNA-binding protein lark && PF00076:RNA recognition motif. (a.k.a. RRM, RBD, or RNP domain)	RRM_1
Scaffold-350.5	902.065	898.848	933.006	1318.43	701.671	912.248	879.872	799.004	815.442	protein_coding_gene	Scaffold-350	166018	170259	-	842	-	- && Q24439.2 RecName: Full=ATP synthase subunit O, mitochondrial; AltName: Full=Oligomycin sensitivity conferral protein; Short=OSCP; Flags: Precursor && PF00213:ATP synthase delta (OSCP) subunit	-
Scaffold-308.7	892.078	772.792	791.975	1323.32	820.956	961.386	954.718	840.62	782.747	protein_coding_gene	Scaffold-308	143074	154234	+	1032	-	- && Q6YFP9.1 RecName: Full=Cytochrome c oxidase subunit 6B2; AltName: Full=Cytochrome c oxidase subunit VIb isoform 2; Short=COX VIb-2; AltName: Full=Cytochrome c oxidase subunit VIb, testis-specific isoform && PF02297:Cytochrome oxidase c subunit VIb	-
Scaffold-52.84	848.352	701.535	928.199	1059.08	720.928	910.318	1175.63	936.434	813.127	protein_coding_gene	Scaffold-52	1236839	1264741	-	2778	-	- && P41374.1 RecName: Full=Eukaryotic translation initiation factor 2 subunit 1; AltName: Full=Eukaryotic translation initiation factor 2 subunit alpha; Short=eIF-2-alpha && PF00575:S1 RNA binding domain|PF12906:RING-variant domain|PF00067:Cytochrome P450	p450
Scaffold-3.148	1070.98	786.316	1038	1863.19	612.585	642.041	968.517	624.797	454.477	protein_coding_gene	Scaffold-3	2857125	2858406	+	459	-	- && - && -	-
Scaffold-147.41	728.377	921.162	815.465	2370.2	710.099	678.483	605.875	606.365	497.052	protein_coding_gene	Scaffold-147	801692	805072	-	599	-	- && - && -	-
Scaffold-57.105	772.873	957.017	930.411	999.574	826.956	904.979	873.495	806.396	758.993	protein_coding_gene	Scaffold-57	2610320	2627797	+	1293	-	- && P41822.2 RecName: Full=Ferritin subunit; AltName: Full=AeFer(H); AltName: Full=Ferritin heavy chain-like protein; Flags: Precursor && PF00210:Ferritin-like domain	Ferritin
Scaffold-58.163	727.308	872.569	917.322	877.893	902.859	855.753	888.876	838.626	836.608	protein_coding_gene	Scaffold-58	2739142	2744470	+	738	-	- && Q6XHI1.1 RecName: Full=Thioredoxin-2; Short=Trx-2 && PF00085:Thioredoxin	-
Scaffold-4.146	792.189	650.977	756.258	1525.54	715.355	907.47	842.823	812.548	565.727	protein_coding_gene	Scaffold-4	2475047	2516386	-	3963	-	- && O76756.2 RecName: Full=40S ribosomal protein S8 && PF01201:Ribosomal protein S8e	-
Scaffold-3.170	920.327	702.639	854.804	1054.48	751.558	649.002	1200.69	885.648	521.354	protein_coding_gene	Scaffold-3	3331919	3341520	-	1323	-	- && Q9VAN0.1 RecName: Full=Probable phosphoserine aminotransferase; Short=PSAT; AltName: Full=Phosphohydroxythreonine aminotransferase && PF00266:Aminotransferase class-V	Aminotran_5
Scaffold-143.37	819.563	698.915	706.423	1434.13	701.849	839.21	921.562	748.008	669.639	protein_coding_gene	Scaffold-143	700348	701101	-	754	-	- && Q0MQE7.1 RecName: Full=NADH dehydrogenase [ubiquinone] 1 beta subcomplex subunit 8, mitochondrial; AltName: Full=Complex I-ASHI; Short=CI-ASHI; AltName: Full=NADH-ubiquinone oxidoreductase ASHI subunit; Flags: Precursor && PF05821:NADH-ubiquinone oxidoreductase ASHI subunit (CI-ASHI or NDUFB8)	-
Scaffold-50.113	984.68	802.038	945.873	829.924	770.646	761.806	937.036	915.689	590.293	protein_coding_gene	Scaffold-50	1626737	1640845	+	2164	-	- && P15007.2 RecName: Full=Enolase; AltName: Full=2-phospho-D-glycerate hydro-lyase; AltName: Full=2-phosphoglycerate dehydratase && PF00113:Enolase, C-terminal TIM barrel domain|PF03952:Enolase, N-terminal domain	-
Scaffold-2.162	789.5	733.103	723.309	1207.08	795.647	868.721	848.646	807.462	748.991	protein_coding_gene	Scaffold-2	2910422	2917397	+	1521	-	- && Q9VZ23.1 RecName: Full=GTP-binding nuclear protein Ran; AltName: Full=Ras-related nuclear protein && PF00071:Ras family	Ras
Scaffold-234.7	1767.51	394.968	828.79	447.714	768.534	1065.1	379.508	971.688	874.498	protein_coding_gene	Scaffold-234	123291	140164	-	2488	-	- && Q02942.1 RecName: Full=Transferrin; Flags: Precursor [Blaberus discoidalis] && PF00405:Transferrin	-
Scaffold-103.92	180.746	109.146	140.752	225.465	166.077	207.477	154.026	146.55	6167.31	protein_coding_gene	Scaffold-103	1574900	1584720	+	1374	-	- && - && -	-
Scaffold-55.105	853.643	634.976	671.407	1415.94	685.388	864.009	896.57	748.823	694.495	protein_coding_gene	Scaffold-55	1947914	1956921	-	803	-	- && P43023.2 RecName: Full=Cytochrome c oxidase subunit 6A2, mitochondrial; AltName: Full=Cytochrome c oxidase polypeptide VIa-heart; Short=COXVIAH; Flags: Precursor && PF02046:Cytochrome c oxidase subunit VIa	-
Scaffold-129.23	876.329	666.789	804.908	1322.1	757.781	808.795	723.963	884.119	591.766	protein_coding_gene	Scaffold-129	363977	381736	-	1839	-	- && O16797.3 RecName: Full=60S ribosomal protein L3 && PF00297:Ribosomal protein L3	-
Scaffold-62.182	565.286	592.779	1059.8	2541.15	503.324	361.911	772.538	571.441	375.976	protein_coding_gene	Scaffold-62	2716150	2726402	+	649	-	- && - && PF07172:Glycine rich protein family	-
Scaffold-264.8	676.403	754.45	802.749	1012.36	804.653	880.097	865.581	807.986	719.858	protein_coding_gene	Scaffold-264	90400	93952	+	1115	-	- && Q96K17.1 RecName: Full=Transcription factor BTF3 homolog 4; AltName: Full=Basic transcription factor 3-like 4 >Q5RC59.1 RecName: Full=Transcription factor BTF3 homolog 4; AltName: Full=Basic transcription factor 3-like 4 >Q9CQH7.1 RecName: Full=Transcription factor BTF3 homolog 4; AltName: Full=Basic transcription factor 3-like 4 && PF01849:NAC domain	-
Scaffold-15.277	759.356	716.935	783.282	1287.64	759.809	805.789	787.915	691.629	710.87	protein_coding_gene	Scaffold-15	6434239	6443533	-	1164	-	- && Q9V3P0.1 RecName: Full=Peroxiredoxin 1; AltName: Full=Cytosolic thioredoxin peroxidase; Short=DPx-4783; Short=DmTPx-1; AltName: Full=Thioredoxin peroxidase && PF10417:C-terminal domain of 1-Cys peroxiredoxin|PF00578:AhpC/TSA family	-
Scaffold-77.98	838.583	681.484	686.439	1424.17	680.632	840.623	844.646	703.781	597.709	protein_coding_gene	Scaffold-77	1600805	1604142	-	501	-	- && - && -	-
Scaffold-135.40	697.076	810.139	796.514	887.102	693.795	788.184	1025.37	916.408	614.337	protein_coding_gene	Scaffold-135	867369	877618	+	843	-	- && Q9VBV3.1 RecName: Full=Protein takeout; Flags: Precursor && PF06585:Haemolymph juvenile hormone binding protein (JHBP)	-
Scaffold-150.13	863.934	752.449	830.382	1011.8	610.773	713.402	751.828	732.998	715.476	protein_coding_gene	Scaffold-150	232240	251885	+	1853	-	- && Q9VL18.1 RecName: Full=Probable elongation factor 1-delta; Short=EF-1-delta && PF00736:EF-1 guanine nucleotide exchange domain|PF10587:Eukaryotic elongation factor 1 beta central acidic region	-
Scaffold-83.118	698.1	614.658	772.442	1218.02	652.916	809.017	682.223	859.268	583.499	protein_coding_gene	Scaffold-83	1443108	1475979	+	1737	-	- && - && -	-
Scaffold-57.104	744.802	703.068	769.308	1055.39	699.384	762.395	780.951	659.096	621.07	protein_coding_gene	Scaffold-57	2588627	2603557	-	1147	-	- && - && -	-
Scaffold-377.21	674.709	666.81	725.051	1123.14	665.911	736.655	772.187	671.842	602.701	protein_coding_gene	Scaffold-377	272049	273643	-	342	-	- && - && -	-
Scaffold-114.27	678.921	627.422	476.404	1026.29	860.696	1062.85	574.846	601.487	682.287	protein_coding_gene	Scaffold-114	390989	395994	-	1629	-	- && P06603.1 RecName: Full=Tubulin alpha-1 chain && PF03953:Tubulin C-terminal domain|PF00091:Tubulin/FtsZ family, GTPase domain	Tubulin
Scaffold-97.170	694.721	651.371	631.451	1069.69	680.958	742.517	745.331	651.881	642.242	protein_coding_gene	Scaffold-97	3450782	3458954	+	1549	-	- && P26256.1 RecName: Full=Annexin-B12; AltName: Full=Annexin XII; AltName: Full=Annexin-12 && PF00191:Annexin	-
Scaffold-126.116	466.107	663.771	508.963	497.045	907.886	1102.92	782.684	806.603	766.13	protein_coding_gene	Scaffold-126	1766184	1778154	+	2536	-	- && - && -	-
Scaffold-151.42	687.991	609.829	724.177	854.257	634.441	768.162	664.085	681.174	855.818	protein_coding_gene	Scaffold-151	792125	814781	+	2960	-	- && Q07171.2 RecName: Full=Gelsolin; Flags: Precursor && PF00626:Gelsolin repeat	-
Scaffold-583.5	542.225	886.219	1243.97	122.649	628.914	598.338	515.93	722.894	1049.14	protein_coding_gene	Scaffold-583	143314	143821	+	508	-	- && - && -	-
Scaffold-9.194	661.885	754.82	804.617	344.711	795.802	676.923	660.533	832.846	738.622	protein_coding_gene	Scaffold-9	3410116	3438562	+	2886	-	- && Q9EPH8.1 RecName: Full=Polyadenylate-binding protein 1; Short=PABP-1; Short=Poly(A)-binding protein 1 && PF00076:RNA recognition motif. (a.k.a. RRM, RBD, or RNP domain)|PF00658:Poly-adenylate binding protein, unique domain	RRM_1
Scaffold-27424.1	373.306	843.123	1381.7	206.82	625.756	680.518	505.615	586.945	1065.1	protein_coding_gene	Scaffold-27424	29	499	-	471	-	- && - && -	-
Scaffold-10.24	699.482	565.454	648.756	1039.82	586.385	719.448	731.76	671.37	524.593	protein_coding_gene	Scaffold-10	515658	526146	+	921	-	- && Q94360.1 RecName: Full=Probable NADH dehydrogenase [ubiquinone] iron-sulfur protein 7, mitochondrial; AltName: Full=Complex I-20kD; Short=CI-20kD; AltName: Full=NADH-ubiquinone oxidoreductase 20 kDa subunit; Flags: Precursor && PF01058:NADH ubiquinone oxidoreductase, 20 Kd subunit	-
Scaffold-36.17	689.146	585.181	587.637	890.704	763.573	713.291	626.603	674.806	639.007	protein_coding_gene	Scaffold-36	320382	333917	-	1600	-	- && Q9VNE2.1 RecName: Full=Protein krasavietz; AltName: Full=Eukaryotic translation initiation factor 5C domain-containing protein; Short=Decp; Short=eIF5C domain-containing protein; AltName: Full=Protein extra bases && PF02020:eIF4-gamma/eIF5/eIF2-epsilon	-
Scaffold-26.49	323.778	778.637	654.733	345.285	773.158	854.041	661.157	682.458	965.373	protein_coding_gene	Scaffold-26	916668	933188	-	774	-	- && P48596.3 RecName: Full=GTP cyclohydrolase 1; AltName: Full=GTP cyclohydrolase I; Short=GTP-CH-I; AltName: Full=Protein punch && PF01227:GTP cyclohydrolase I	GTP_cyclohydroI
Scaffold-224.47	399.597	651.277	604.634	1053.44	760.136	698.395	804.566	560.969	427.776	protein_coding_gene	Scaffold-224	778126	789908	+	1968	-	- && Q7M4F3.1 RecName: Full=Endocuticle structural glycoprotein SgAbd-2 && PF00651:BTB/POZ domain|PF07707:BTB And C-terminal Kelch|PF00379:Insect cuticle protein	BTB
Scaffold-72.573	676.668	479.258	496.179	1112.66	544.19	672.768	736.31	624.881	562.514	protein_coding_gene	Scaffold-72	11504678	11521294	-	1386	-	- && Q4GXU6.1 RecName: Full=40S ribosomal protein S4 && PF00467:KOW motif|PF08071:RS4NT (NUC023) domain|PF00900:Ribosomal family S4e|PF01479:S4 domain	Ribosomal_S4e
Scaffold-203.26	494.638	624.892	293.34	502.239	858.531	1063.62	709.222	580.146	736.745	protein_coding_gene	Scaffold-203	383066	412070	-	1574	-	- && - && PF01607:Chitin binding Peritrophin-A domain	CBM_14
Scaffold-215.3	903.987	597.659	690.815	557.538	538.566	531.864	853.513	740.184	441.202	protein_coding_gene	Scaffold-215	69345	108407	-	2220	-	- && Q7ZYC4.1 RecName: Full=Long-chain-fatty-acid--CoA ligase ACSBG2; AltName: Full=Acyl-CoA synthetase bubblegum family member 2 && PF00501:AMP-binding enzyme	AMP-binding
Scaffold-391.6	624.185	548.199	560.354	865.839	561.943	687.101	741.476	721.489	531.006	protein_coding_gene	Scaffold-391	155295	166059	+	2264	-	- && Q7PQV7.2 RecName: Full=ADP,ATP carrier protein 2; AltName: Full=ADP/ATP translocase 2; AltName: Full=Adenine nucleotide translocator 2; Short=ANT 2 && PF00153:Mitochondrial carrier protein	Mito_carr
Scaffold-283.25	652.553	544.596	588.356	998.938	550.93	693.676	627.301	652.093	470.62	protein_coding_gene	Scaffold-283	482882	502766	-	1098	-	- && P46507.1 RecName: Full=26S protease regulatory subunit 6B; AltName: Full=ATPase MS73 && PF00004:ATPase family associated with various cellular activities (AAA)|PF02823:ATP synthase, Delta/Epsilon chain, beta-sandwich domain	AAA
Scaffold-230.20	608.199	538.768	574.19	1113.7	540.063	680.16	635.627	580.165	503.209	protein_coding_gene	Scaffold-230	266865	294691	+	3492	-	- && Q962R6.3 RecName: Full=40S ribosomal protein S13 && PF08069:Ribosomal S13/S15 N-terminal domain|PF00312:Ribosomal protein S15	-
Scaffold-8.171	568.07	518.579	573.219	1258.22	538.087	649.013	636.133	577.366	448.11	protein_coding_gene	Scaffold-8	3083236	3144772	+	6210	-	- && Q6RYS3.1 RecName: Full=60S ribosomal protein L8 >Q95V39.1 RecName: Full=60S ribosomal protein L8 && PF03947:Ribosomal Proteins L2, C-terminal domain|PF00135:Carboxylesterase family|PF01151:GNS1/SUR4 family|PF00777:Glycosyltransferase family 29 (sialyltransferase)|PF00181:Ribosomal Proteins L2, RNA binding domain	COesterase
Scaffold-96.134	687.39	534.193	538.992	855.655	590.534	686.663	659.501	621.867	492.382	protein_coding_gene	Scaffold-96	2914421	2921823	-	1565	-	- && Q9D0M3.1 RecName: Full=Cytochrome c1, heme protein, mitochondrial; AltName: Full=Complex III subunit 4; AltName: Full=Complex III subunit IV; AltName: Full=Cytochrome b-c1 complex subunit 4; AltName: Full=Ubiquinol-cytochrome-c reductase complex cytochrome c1 subunit; Short=Cytochrome c-1; Flags: Precursor && PF02167:Cytochrome C1 family	-
Scaffold-123.15	709.452	507.135	614.552	848.432	596.678	594.9	690.524	600.665	467.269	protein_coding_gene	Scaffold-123	287100	302572	-	2166	-	- && Q5ZME2.1 RecName: Full=Malate dehydrogenase, cytoplasmic; AltName: Full=Cytosolic malate dehydrogenase && PF00056:lactate/malate dehydrogenase, NAD binding domain|PF02866:lactate/malate dehydrogenase, alpha/beta C-terminal domain	-
Scaffold-17.169	339.198	630.778	554.34	746.429	568.662	691.142	718.21	738.68	624.855	protein_coding_gene	Scaffold-17	3602598	3605338	-	511	-	- && - && -	-
Scaffold-289.8	602.211	687.08	611.49	390.014	676.902	659.027	575.065	624.15	683.391	protein_coding_gene	Scaffold-289	189120	191558	-	564	-	- && P42678.1 RecName: Full=Protein translation factor SUI1 homolog && PF01253:Translation initiation factor SUI1	SUI1
Scaffold-102.20	329.663	619.306	442.928	342.88	803.895	839.246	683.46	744.46	698.591	protein_coding_gene	Scaffold-102	462312	485341	+	1260	-	- && P82166.1 RecName: Full=Cuticle protein 19.8; AltName: Full=LmNCP19.8 && PF00379:Insect cuticle protein	Chitin_bind_4
Scaffold-155.26	480.201	581.099	469.776	698.71	558.714	837.124	641.484	659.167	550.727	protein_coding_gene	Scaffold-155	680642	706590	-	2163	-	- && Q9Y5B8.1 RecName: Full=Nucleoside diphosphate kinase 7; Short=NDK 7; Short=NDP kinase 7; AltName: Full=nm23-H7 && PF00089:Trypsin|PF00057:Low-density lipoprotein receptor domain class A|PF00334:Nucleoside diphosphate kinase|PF13499:EF-hand domain pair|PF13833:EF-hand domain pair	NDK
Scaffold-204.21	712.093	591.029	600.477	816.639	625.176	424.955	604.175	593.996	484.769	protein_coding_gene	Scaffold-204	469759	487164	-	1188	-	- && P48594.2 RecName: Full=Serpin B4; AltName: Full=Leupin; AltName: Full=Peptidase inhibitor 11; Short=PI-11; AltName: Full=Squamous cell carcinoma antigen 2; Short=SCCA-2 && PF00079:Serpin (serine protease inhibitor)	Serpin
Scaffold-37.104	590.16	436.879	458.265	1309.05	455.8	592.771	634.622	486.744	451.382	protein_coding_gene	Scaffold-37	2257065	2268203	+	1482	-	- && - && PF05680:ATP synthase E chain	-
Scaffold-23.108	527.837	474.868	470.558	1018.89	778.872	578.017	493.18	596.021	465.883	protein_coding_gene	Scaffold-23	1991733	1999557	+	975	-	- && Q9CPW5.1 RecName: Full=Translocon-associated protein subunit beta; Short=TRAP-beta; AltName: Full=Signal sequence receptor subunit beta; Short=SSR-beta; Flags: Precursor && PF05753:Translocon-associated protein beta (TRAPB)	-
Scaffold-18.51	514.821	624.436	658.261	866.623	623.086	513.287	526.691	568.948	475.251	protein_coding_gene	Scaffold-18	1148123	1152881	+	708	-	- && Q9D855.3 RecName: Full=Cytochrome b-c1 complex subunit 7; AltName: Full=Complex III subunit 7; AltName: Full=Complex III subunit VII; AltName: Full=Ubiquinol-cytochrome c reductase complex 14 kDa protein && PF02271:Ubiquinol-cytochrome C reductase complex 14kD subunit	-
Scaffold-9.195	573.824	443.025	463.833	1167.36	492.024	595.892	609.062	515.967	494.474	protein_coding_gene	Scaffold-9	3441775	3463308	-	589	-	- && Q8LFQ6.2 RecName: Full=Glutaredoxin-C4; Short=AtGrxC4 && PF00462:Glutaredoxin	-
Scaffold-60.38	706.735	234.332	247.503	1199.19	409.351	583.564	725.597	643.216	604.344	protein_coding_gene	Scaffold-60	875603	880546	+	1015	-	- && - && -	-
Scaffold-175.51	545.92	488.443	518.332	1086.15	516.925	632.533	565.427	515.419	464.08	protein_coding_gene	Scaffold-175	737206	744134	+	760	-	- && - && PF06212:GRIM-19 protein	-
Scaffold-541.5	596.332	516.708	444.207	776.848	527.546	736.039	646.791	501.978	580.4	protein_coding_gene	Scaffold-541	63183	67878	+	743	-	- && - && PF05873:ATP synthase D chain, mitochondrial (ATP5H)	-
Scaffold-40.105	684.254	572.9	611.123	648.44	530.753	593.32	624.464	553.014	456.256	protein_coding_gene	Scaffold-40	2355747	2363655	+	786	-	- && Q32KV0.1 RecName: Full=Phosphoglycerate mutase 2; AltName: Full=BPG-dependent PGAM 2 && PF00300:Histidine phosphatase superfamily (branch 1)	-
Scaffold-15.290	656.856	523.157	572.941	810.369	491.014	542.117	682.997	547.368	424.302	protein_coding_gene	Scaffold-15	6671687	6722292	-	4434	-	- && P07764.5 RecName: Full=Fructose-bisphosphate aldolase && PF00274:Fructose-bisphosphate aldolase class-I|PF07571:TAF6 C-terminal HEAT repeat domain|PF02969:TATA box binding protein associated factor (TAF)	-
Scaffold-570.4	1029.24	450.379	708.772	386.145	449.702	308.071	1003.4	594.936	287.313	protein_coding_gene	Scaffold-570	85800	100437	+	1668	-	- && Q9I7S8.2 RecName: Full=Multifunctional protein ADE2; AltName: Full=Protein adenosine-5; Includes: RecName: Full=Phosphoribosylaminoimidazole-succinocarboxamide synthase; AltName: Full=SAICAR synthetase; Includes: RecName: Full=Phosphoribosylaminoimidazole carboxylase; AltName: Full=AIR carboxylase; Short=AIRC && PF00731:AIR carboxylase|PF01259:SAICAR synthetase	-
Scaffold-759.5	715.355	573.929	633.304	223.31	728.426	547.79	533.707	603.132	597.99	protein_coding_gene	Scaffold-759	52560	81634	+	2999	-	- && P10987.4 RecName: Full=Actin-5C; Flags: Precursor >P84184.1 RecName: Full=Actin-A3b, cytoplasmic; Flags: Precursor >P84185.1 RecName: Full=Actin-5C; AltName: Full=Actin-1D, cytoplasmic; Flags: Precursor >P84183.1 RecName: Full=Actin, cytoplasmic A4; Flags: Precursor && PF00022:Actin|PF04857:CAF1 family ribonuclease|PF08675:RNA binding domain	Actin
Scaffold-298.21	173.202	588.483	570.234	1726.12	367.778	575.019	400.441	222.22	508.116	protein_coding_gene	Scaffold-298	297459	299081	-	650	-	- && - && -	-
Scaffold-422.10	516.766	474.467	489.34	888.699	535.815	610.317	565.624	560.115	473.417	protein_coding_gene	Scaffold-422	192587	205551	+	1231	-	- && Q9GV27.1 RecName: Full=Eukaryotic translation initiation factor 3 subunit H; Short=eIF3h && PF01398:JAB1/Mov34/MPN/PAD-1 ubiquitin protease	Mov34
Scaffold-54.55	341.588	487.635	255.485	388.42	873.452	917.647	605.411	624.583	598.904	protein_coding_gene	Scaffold-54	1051545	1069554	-	971	-	- && - && -	-
Scaffold-55.99	1874.98	364.93	450.567	427.152	357.484	389.9	431.757	447.172	345.444	protein_coding_gene	Scaffold-55	1815633	1831264	-	2155	-	- && - && -	-
Scaffold-238.25	1776.18	0	0	1796.34	23.3879	0.433544	2.48002	0.340419	1453.72	protein_coding_gene	Scaffold-238	486108	490503	+	843	-	- && - && -	-
Scaffold-21.36	508.005	432.539	466.374	1129.06	431.858	512.007	610.075	519.982	427.446	protein_coding_gene	Scaffold-21	619526	653581	-	5114	-	- && Q66PG1.1 RecName: Full=LARGE xylosyl- and glucuronyltransferase 2; AltName: Full=Glycosyltransferase-like 1B; Includes: RecName: Full=Xylosyltransferase LARGE2; Includes: RecName: Full=Beta-1,3-glucuronyltransferase LARGE2 && PF13896:Glycosyl-transferase for dystroglycan|PF14846:Domain of unknown function (DUF4485)|PF01501:Glycosyl transferase family 8|PF00338:Ribosomal protein S10p/S20e	Ribosomal_S10
Scaffold-23.71	600.531	432.315	467.918	997.812	449.799	582.999	515.19	458.227	509.978	protein_coding_gene	Scaffold-23	1354194	1372952	-	1049	-	- && P28755.2 RecName: Full=Superoxide dismutase [Cu-Zn] && PF00080:Copper/zinc superoxide dismutase (SODC)	-
Scaffold-187.26	605.001	293.521	441.876	927.408	557.186	513.492	700.309	578.832	330.823	protein_coding_gene	Scaffold-187	528763	529604	-	842	-	- && Q24439.2 RecName: Full=ATP synthase subunit O, mitochondrial; AltName: Full=Oligomycin sensitivity conferral protein; Short=OSCP; Flags: Precursor && PF00213:ATP synthase delta (OSCP) subunit	-
Scaffold-87.39	418.617	0	0.383981	0	2833.14	1280.9	2.02191	1.35685	405.06	protein_coding_gene	Scaffold-87	886998	893622	+	282	-	- && - && -	-
Scaffold-283.19	523.922	538.128	651.194	542.83	623.38	479.818	507.799	594.224	476.552	protein_coding_gene	Scaffold-283	357492	374588	-	1953	-	- && Q9JLR1.3 RecName: Full=Protein transport protein Sec61 subunit alpha isoform 2; Short=Sec61 alpha-2 >Q9H9S3.3 RecName: Full=Protein transport protein Sec61 subunit alpha isoform 2; Short=Sec61 alpha-2 >Q2KHX4.3 RecName: Full=Protein transport protein Sec61 subunit alpha isoform 2; Short=Sec61 alpha-2 && PF00344:SecY translocase|PF10559:Plug domain of Sec61p	-
Scaffold-95.33	441.05	406.555	535.852	647.117	572.127	786.716	582.381	448.811	514.473	protein_coding_gene	Scaffold-95	569468	572714	-	662	-	- && Q3T114.3 RecName: Full=Ribonuclease UK114 && PF01042:Endoribonuclease L-PSP	Ribonuc_L-PSP
Scaffold-33.25	239.922	454.707	448.853	1137.09	573.327	676.565	403.402	523.774	429.165	protein_coding_gene	Scaffold-33	253422	266357	+	551	-	- && P82120.1 RecName: Full=Cuticle protein 7; AltName: Full=BcNCP15.0 && -	-
Scaffold-2.86	534.144	460.484	451.708	838.343	462.634	551.7	582.076	493.221	476.843	protein_coding_gene	Scaffold-2	1400550	1401196	-	647	-	- && O09111.2 RecName: Full=NADH dehydrogenase [ubiquinone] 1 beta subcomplex subunit 11, mitochondrial; AltName: Full=Complex I-ESSS; Short=CI-ESSS; AltName: Full=NADH-ubiquinone oxidoreductase ESSS subunit; AltName: Full=Neuronal protein 15.6; Short=Np15.6; Short=p15.6; Flags: Precursor && PF10183:ESSS subunit of NADH:ubiquinone oxidoreductase (complex I)	-
Scaffold-11.149	493.913	450.208	508.259	806.496	508.49	559.646	598.688	500.971	407.879	protein_coding_gene	Scaffold-11	2942615	2946164	-	970	-	- && Q9CR47.1 RecName: Full=Ribosome biogenesis protein NSA2 homolog; AltName: Full=L-name-related protein 42; Short=LNR42; AltName: Full=TGF-beta-inducible nuclear protein 1 && PF01201:Ribosomal protein S8e	-
Scaffold-273.19	548.123	442.573	469.536	901.56	468.048	520.386	562.806	453.687	455.338	protein_coding_gene	Scaffold-273	369537	370232	+	696	-	- && - && -	-
Scaffold-9.67	455.338	437.237	494.988	574.624	536.494	624.291	533.331	649.11	512.301	protein_coding_gene	Scaffold-9	980038	1058190	+	4098	-	- && Q7PPA5.5 RecName: Full=Calcium-transporting ATPase sarcoplasmic/endoplasmic reticulum type; AltName: Full=Calcium pump && PF00122:E1-E2 ATPase|PF00690:Cation transporter/ATPase, N-terminus|PF08282:haloacid dehalogenase-like hydrolase|PF00689:Cation transporting ATPase, C-terminus|PF13246:Cation transport ATPase (P-type)	E1-E2_ATPase
Scaffold-144.28	514.912	446.659	527.878	510.283	532.741	571.153	639.691	571.585	440.715	protein_coding_gene	Scaffold-144	467134	484980	-	1944	-	- && Q9DCD0.3 RecName: Full=6-phosphogluconate dehydrogenase, decarboxylating && PF03446:NAD binding domain of 6-phosphogluconate dehydrogenase|PF00393:6-phosphogluconate dehydrogenase, C-terminal domain	NAD_binding_2
Scaffold-231.24	343.276	570.288	358.472	970.277	577.916	473.453	551.707	449.521	430.824	protein_coding_gene	Scaffold-231	301570	307839	+	818	-	- && - && -	-
Scaffold-61.7	496.987	433.382	476.003	849.149	440.589	538.907	551.92	459.213	415.048	protein_coding_gene	Scaffold-61	216792	224073	-	687	-	- && Q9CQJ8.3 RecName: Full=NADH dehydrogenase [ubiquinone] 1 beta subcomplex subunit 9; AltName: Full=Complex I-B22; Short=CI-B22; AltName: Full=NADH-ubiquinone oxidoreductase B22 subunit && PF05347:Complex 1 protein (LYR family)	-
Scaffold-44.46	526.657	420.185	461.148	886.062	444.369	514.353	560.875	429.289	408.237	protein_coding_gene	Scaffold-44	781790	784958	-	572	-	- && Q02366.2 RecName: Full=NADH dehydrogenase [ubiquinone] 1 alpha subcomplex subunit 6; AltName: Full=Complex I-B14; Short=CI-B14; AltName: Full=NADH-ubiquinone oxidoreductase B14 subunit && PF05347:Complex 1 protein (LYR family)	-
Scaffold-117.86	381.265	487.343	535.829	818.56	418.252	605.941	539.307	422.102	439.085	protein_coding_gene	Scaffold-117	972142	976902	+	1299	-	- && - && -	-
Scaffold-295.21	472.565	383.772	358.243	990.947	403.252	499.135	606.096	443.892	431.178	protein_coding_gene	Scaffold-295	382980	399530	+	762	-	- && Q3B748.1 RecName: Full=Protein LLP homolog; AltName: Full=Protein LAPS18-like && PF10169:Learning-associated protein	-
Scaffold-55.25	471.674	445.211	439.964	771.833	459.871	556.705	507.631	471.666	452.131	protein_coding_gene	Scaffold-55	505283	513169	-	1141	-	- && - && PF02330:Mitochondrial glycoprotein	-
Scaffold-7.85	471.246	491.42	526.492	547.08	453.684	541.594	518.94	467.465	429.666	protein_coding_gene	Scaffold-7	2071104	2088457	-	1582	-	- && P00423.1 RecName: Full=Cytochrome c oxidase subunit 4 isoform 1, mitochondrial; AltName: Full=Cytochrome c oxidase polypeptide IV; AltName: Full=Cytochrome c oxidase subunit IV isoform 1; Short=COX IV-1; Flags: Precursor && PF02936:Cytochrome c oxidase subunit IV|PF13877:Potential Monad-binding region of RPAP3	COX4
Scaffold-23.174	504.392	447.656	487.967	512.17	511.372	527.815	502.257	499.904	454.046	protein_coding_gene	Scaffold-23	3696053	3710363	-	1248	-	- && Q9CQC9.1 RecName: Full=GTP-binding protein SAR1b && PF00025:ADP-ribosylation factor family	Arf
Scaffold-102.60	451.212	417.078	412.896	714.01	418.104	585.441	428.354	545.684	322.671	protein_coding_gene	Scaffold-102	1276283	1279099	-	396	-	- && - && -	-
Scaffold-5.95	463.578	484.812	456.621	765.023	382.299	415.648	482.272	455.176	389.284	protein_coding_gene	Scaffold-5	1963814	1978783	+	1134	-	- && O18598.3 RecName: Full=Glutathione S-transferase; AltName: Full=GST class-sigma; AltName: Full=Major allergen Bla g 5; AltName: Allergen=Bla g 5 && PF00043:Glutathione S-transferase, C-terminal domain|PF02798:Glutathione S-transferase, N-terminal domain	GST_N
Scaffold-3316.1	898.256	579.159	545.476	272.1	639.337	207.403	413.424	240.98	480.098	protein_coding_gene	Scaffold-3316	1	5237	+	4611	-	- && Q868N5.1 RecName: Full=Vitellogenin; Flags: Precursor && PF09172:Domain of unknown function (DUF1943)|PF01347:Lipoprotein amino terminal region	Vitellogenin_N
Scaffold-224.51	246.09	386.188	363.066	109.411	754.661	772.247	586.416	573.679	475.267	protein_coding_gene	Scaffold-224	829866	834868	-	357	-	- && - && -	-
Scaffold-66.78	469.933	379.249	373.582	824.815	429.312	515.418	472.749	396.469	374.26	protein_coding_gene	Scaffold-66	1377315	1385060	+	871	-	- && Q9N2W7.2 RecName: Full=Probable NADH dehydrogenase [ubiquinone] 1 alpha subcomplex subunit 12; AltName: Full=NADH-ubiquinone oxidoreductase 17.0 kDa subunit && PF05071:NADH ubiquinone oxidoreductase subunit NDUFA12	Complex1_17_2kD
Scaffold-31.118	281.933	555.952	659.096	491.156	394.218	498.725	518.539	458.028	376.078	protein_coding_gene	Scaffold-31	2269700	2273408	+	576	-	- && Q9W1C9.2 RecName: Full=Ejaculatory bulb-specific protein 3; AltName: Full=Ejaculatory bulb-specific protein III; AltName: Full=PEB-meIII; AltName: Full=PEBmelIII; Flags: Precursor && PF03392:Insect pheromone-binding family, A10/OS-D	-
Scaffold-262.12	476.746	456.769	505.794	712.539	361.125	422.829	553.368	341.795	384.78	protein_coding_gene	Scaffold-262	277818	278501	+	684	-	- && B0VYY3.1 RecName: Full=Cytochrome c oxidase subunit 5A, mitochondrial; AltName: Full=Cytochrome c oxidase polypeptide Va; Flags: Precursor && PF02284:Cytochrome c oxidase subunit Va	-
Scaffold-109.5	574.169	412.664	538.986	372.572	429.345	433.853	603.91	475.506	372.644	protein_coding_gene	Scaffold-109	92439	173859	-	3747	-	- && P28227.1 RecName: Full=NADP-dependent malic enzyme; Short=NADP-ME && PF00390:Malic enzyme, N-terminal domain|PF03949:Malic enzyme, NAD binding domain	Malic_M
Scaffold-10.109	336.267	426.356	319.259	448.175	598.83	653.93	450.713	558.606	420.849	protein_coding_gene	Scaffold-10	2037538	2065026	+	1085	-	- && P14318.2 RecName: Full=Muscle-specific protein 20 && PF00402:Calponin family repeat|PF00307:Calponin homology (CH) domain	CH
Scaffold-17.98	480.191	424.306	503.432	694.56	414.41	427.851	468.938	405.972	375.889	protein_coding_gene	Scaffold-17	2031110	2039397	+	459	-	- && - && PF04588:Hypoxia induced protein conserved region	-
Scaffold-88.18	777.985	468.214	616.872	152.73	408.707	378.112	521.933	514.862	340.223	protein_coding_gene	Scaffold-88	365398	382403	+	1755	-	- && O44390.2 RecName: Full=Acyl-CoA Delta(11) desaturase; AltName: Full=Acyl-CoA Delta-11 desaturase; Short=Delta(11)-desaturase && PF00487:Fatty acid desaturase	-
Scaffold-20.304	403.017	413.672	421.153	1036.36	726.92	215.064	228.466	275.583	447.038	protein_coding_gene	Scaffold-20	7633127	7645939	+	6030	-	- && Q16927.2 RecName: Full=Vitellogenin-A1; Short=VG; AltName: Full=PVG1; Contains: RecName: Full=Vitellin light chain; Short=VL; Contains: RecName: Full=Vitellin heavy chain; Short=VH; Flags: Precursor && PF01347:Lipoprotein amino terminal region|PF09172:Domain of unknown function (DUF1943)|PF00094:von Willebrand factor type D domain	Vitellogenin_N
Scaffold-13.89	466.459	426.18	466.798	381.579	425.386	484.051	451.086	599.583	453.111	protein_coding_gene	Scaffold-13	1330176	1350298	-	2097	-	- && Q27377.2 RecName: Full=Putative odorant-binding protein A10; AltName: Full=Antennal protein 10; AltName: Full=OS-D protein; Flags: Precursor && PF03392:Insect pheromone-binding family, A10/OS-D|PF03372:Endonuclease/Exonuclease/phosphatase family	Exo_endo_phos
Scaffold-7.84	493.285	437.658	646.331	674.268	432.123	362.43	391.575	343.251	370.858	protein_coding_gene	Scaffold-7	2056981	2065335	+	1319	-	- && Q91XC8.3 RecName: Full=Death-associated protein 1; Short=DAP-1 && PF15228:Death-associated protein	-
Scaffold-615.3	989.206	474.806	89.8355	181.571	1218.52	781.989	150.584	9.71088	250.762	protein_coding_gene	Scaffold-615	14540	27972	-	857	-	- && - && -	-
Scaffold-696.2	404.617	467.026	419.702	536.082	424.687	377.27	574.989	512.393	397.278	protein_coding_gene	Scaffold-696	31262	58675	+	4959	-	- && Q9BLC5.1 RecName: Full=Heat shock protein 83; Short=BmHSP90 && PF00183:Hsp90 protein|PF00078:Reverse transcriptase (RNA-dependent DNA polymerase)|PF02518:Histidine kinase-, DNA gyrase B-, and HSP90-like ATPase	RVT_1
Scaffold-238.30	986.983	0	0	1800.81	41.4238	0	0	0	1284	protein_coding_gene	Scaffold-238	517993	520181	+	1006	-	- && - && -	-
Scaffold-123.44	373.108	365.73	389.633	748.242	414.579	527.913	460.204	389.008	413.52	protein_coding_gene	Scaffold-123	1078309	1083836	-	585	-	- && - && -	-
Scaffold-72.435	416.088	385.505	380.508	677.868	450.969	605.999	400.25	386.356	363.056	protein_coding_gene	Scaffold-72	8145015	8172278	+	1284	-	- && - && -	-
Scaffold-224.42	330.684	369.17	377.123	277.648	633.828	789.418	376.569	495.606	407.487	protein_coding_gene	Scaffold-224	720555	724607	-	348	-	- && Q7M4F3.1 RecName: Full=Endocuticle structural glycoprotein SgAbd-2 && PF00379:Insect cuticle protein	Chitin_bind_4
Scaffold-13.50	456.43	427.773	431.711	665.21	411.973	448.027	443.161	395.595	376.287	protein_coding_gene	Scaffold-13	692113	703343	-	915	-	- && O18598.3 RecName: Full=Glutathione S-transferase; AltName: Full=GST class-sigma; AltName: Full=Major allergen Bla g 5; AltName: Allergen=Bla g 5 && PF02798:Glutathione S-transferase, N-terminal domain|PF00043:Glutathione S-transferase, C-terminal domain	GST_N
Scaffold-77.59	422.659	370.755	434.988	520.424	449.371	507.428	475.451	417.88	432.759	protein_coding_gene	Scaffold-77	911800	921585	-	1574	-	- && - && -	-
Scaffold-891.4	485.564	383.956	455.815	631.571	389.766	471.316	483.463	387.936	342.199	protein_coding_gene	Scaffold-891	38869	68973	-	1623	-	- && Q9JJW3.1 RecName: Full=Up-regulated during skeletal muscle growth protein 5; AltName: Full=Diabetes-associated protein in insulin-sensitive tissues && PF14960:ATP synthase regulation	-
Scaffold-428.6	434.863	386.396	376.973	772.796	401.581	493.521	408.563	371.68	364.863	protein_coding_gene	Scaffold-428	117674	121582	+	725	-	- && Q1HPL8.1 RecName: Full=NADH dehydrogenase [ubiquinone] 1 beta subcomplex subunit 10 && PF10249:NADH-ubiquinone oxidoreductase subunit 10	-
Scaffold-49.64	344.194	440.525	367.176	537.761	375.278	573.584	467.768	453.556	449.685	protein_coding_gene	Scaffold-49	1454376	1475127	-	1957	-	- && Q9BI23.1 RecName: Full=Protein yellow; Flags: Precursor && PF03022:Major royal jelly protein	-
Scaffold-16.59	595.779	439.082	435.856	486.119	308.525	326.592	731.75	435.377	237.369	protein_coding_gene	Scaffold-16	1244076	1265483	-	1391	-	- && P15122.3 RecName: Full=Aldose reductase; Short=AR; AltName: Full=Aldehyde reductase && PF00248:Aldo/keto reductase family	Aldo_ket_red
Scaffold-37.86	571.979	371.86	401.603	483.797	427.427	355.491	640.628	341.258	394.322	protein_coding_gene	Scaffold-37	2009175	2014055	+	1415	-	- && A4IHG1.1 RecName: Full=Leucine-rich repeat-containing protein 58 && PF13855:Leucine rich repeat	-
Scaffold-71.17	529.338	296.193	428.81	727.585	330.061	374.592	417.918	443.58	417.645	protein_coding_gene	Scaffold-71	231010	233925	+	802	-	- && - && -	-
Scaffold-66.34	400.827	330.338	382.8	811.351	369.602	471.651	418.8	426.723	344.209	protein_coding_gene	Scaffold-66	625144	707553	+	9036	-	- && Q9P2D8.4 RecName: Full=Protein unc-79 homolog && PF01248:Ribosomal protein L7Ae/L30e/S12e/Gadd45 family|PF14776:Cation-channel complex subunit UNC-79	-
Scaffold-16.82	433.041	368.289	394.466	593.792	427.491	461.274	446.846	431.528	367.407	protein_coding_gene	Scaffold-16	1674848	1701225	-	3089	-	- && Q1HDZ5.1 RecName: Full=Eukaryotic translation initiation factor 3 subunit B; Short=eIF3b; AltName: Full=Eukaryotic translation initiation factor 3 subunit 9 && PF08662:Eukaryotic translation initiation factor eIF2A	-
Scaffold-211.2	401.455	352.946	392.838	766.833	375.87	446.88	453.063	408.319	321.805	protein_coding_gene	Scaffold-211	32393	182933	-	7917	-	- && Q10751.1 RecName: Full=Angiotensin-converting enzyme; Short=ACE; AltName: Full=Dipeptidyl carboxypeptidase I; AltName: Full=Kininase II && PF10277:Frag1/DRAM/Sfk1 family|PF01401:Angiotensin-converting enzyme|PF00078:Reverse transcriptase (RNA-dependent DNA polymerase)|PF13920:Zinc finger, C3HC4 type (RING finger)|PF00827:Ribosomal L15	Peptidase_M2
Scaffold-10.178	339.473	414.704	501.017	504.684	358.77	416.908	596.035	397.322	377.963	protein_coding_gene	Scaffold-10	3364561	3374137	-	1426	-	- && Q9W1C9.2 RecName: Full=Ejaculatory bulb-specific protein 3; AltName: Full=Ejaculatory bulb-specific protein III; AltName: Full=PEB-meIII; AltName: Full=PEBmelIII; Flags: Precursor && PF03392:Insect pheromone-binding family, A10/OS-D	-
Scaffold-14.72	436.933	334.869	376.351	756.096	376.069	477.24	438.37	394.82	303.409	protein_coding_gene	Scaffold-14	1465301	1525124	+	4842	-	- && P51610.2 RecName: Full=Host cell factor 1; Short=HCF; Short=HCF-1; AltName: Full=C1 factor; AltName: Full=CFF; AltName: Full=VCAF; AltName: Full=VP16 accessory protein; Contains: RecName: Full=HCF N-terminal chain 1; Contains: RecName: Full=HCF N-terminal chain 2; Contains: RecName: Full=HCF N-terminal chain 3; Contains: RecName: Full=HCF N-terminal chain 4; Contains: RecName: Full=HCF N-ter…	CH
Scaffold-81.51	381.152	438.342	394.523	515.081	462.964	436.289	413.825	399.595	399.077	protein_coding_gene	Scaffold-81	1370443	1392456	-	1077	-	- && Q7T3C6.1 RecName: Full=Cleavage and polyadenylation specificity factor subunit 5 && PF11976:Ubiquitin-2 like Rad60 SUMO-like|PF13869:Nucleotide hydrolase	-
Scaffold-553.7	429.259	355.994	414.242	563.159	394.093	455.811	447.536	417.864	321.013	protein_coding_gene	Scaffold-553	116846	139477	-	2058	-	- && P91891.2 RecName: Full=Protein Mo25; AltName: Full=dMo25 && PF02921:Ubiquinol cytochrome reductase transmembrane region|PF09165:Ubiquinol-cytochrome c reductase 8 kDa, N-terminal|PF08569:Mo25-like|PF00355:Rieske [2Fe-2S] domain	-
Scaffold-122.92	384.468	458.404	371.779	539.417	435.241	355.537	360.879	383.957	482.281	protein_coding_gene	Scaffold-122	1988425	2018103	-	1299	-	- && - && -	-
Scaffold-180.1	300.398	352.758	426.768	360.574	380.275	631.224	503.504	228.871	582.911	protein_coding_gene	Scaffold-180	8614	35569	-	1974	-	- && P29981.1 RecName: Full=Cytochrome P450 4C1; AltName: Full=CYPIVC1 && PF00067:Cytochrome P450	p450
Scaffold-6.284	408.278	377.949	491.54	596.688	304.746	395.008	457.08	439.258	290.819	protein_coding_gene	Scaffold-6	4975165	5007502	-	3387	-	- && Q9W1G0.2 RecName: Full=Probable transaldolase && PF00923:Transaldolase|PF01757:Acyltransferase family	-
Scaffold-10.40	451.18	373.179	416.623	566.448	398.723	361.131	430.541	408.385	352.348	protein_coding_gene	Scaffold-10	855023	868207	-	2158	-	- && - && PF06585:Haemolymph juvenile hormone binding protein (JHBP)	-
Scaffold-29.21	454.144	368.632	349.046	617.174	364.73	427.412	469.203	372.05	326.16	protein_coding_gene	Scaffold-29	414406	417089	+	895	-	- && Q9H1K1.2 RecName: Full=Iron-sulfur cluster assembly enzyme ISCU, mitochondrial; AltName: Full=NifU-like N-terminal domain-containing protein; AltName: Full=NifU-like protein; Flags: Precursor && PF01592:NifU-like N terminal domain	-
Scaffold-144.5	401.096	323.031	356.42	778.621	344.499	416.435	439.983	360.57	319.459	protein_coding_gene	Scaffold-144	55979	85756	-	4956	-	- && Q75VN3.1 RecName: Full=Translationally-controlled tumor protein homolog; Short=TCTP; AltName: Full=BmTCTP && PF01443:Viral (Superfamily 1) RNA helicase|PF00838:Translationally controlled tumour protein|PF00078:Reverse transcriptase (RNA-dependent DNA polymerase)	RVT_1
Scaffold-227.8	594.412	52.3232	390.759	262.288	463.784	200.297	147.059	1044.07	516.785	protein_coding_gene	Scaffold-227	179339	185906	+	621	-	- && Q6P5E4.4 RecName: Full=UDP-glucose:glycoprotein glucosyltransferase 1; Short=UGT1; AltName: Full=UDP--Glc:glycoprotein glucosyltransferase; AltName: Full=UDP-glucose ceramide glucosyltransferase-like 1; Flags: Precursor && PF06427:UDP-glucose:Glycoprotein Glucosyltransferase|PF00014:Kunitz/Bovine pancreatic trypsin inhibitor domain	Kunitz_BPTI
Scaffold-69.31	306.075	357.221	526.632	486.96	310.107	462.165	491.968	339.433	387.088	protein_coding_gene	Scaffold-69	677686	688850	+	1260	-	- && - && PF15868:Transcription activator MBF2	-
Scaffold-1778.1	652.466	289.823	402.247	496.141	438.601	281.453	421.433	317.647	352.018	protein_coding_gene	Scaffold-1778	1	4873	+	1157	-	- && Q8MP06.1 RecName: Full=Senecionine N-oxygenase; Short=SNO; Flags: Precursor && PF00743:Flavin-binding monooxygenase-like	FMO-like
Scaffold-69.29	466.507	417.644	498.692	296.944	395.581	357.721	418.855	402.345	395.382	protein_coding_gene	Scaffold-69	628282	667225	+	3518	-	- && P07602.2 RecName: Full=Prosaposin; AltName: Full=Proactivator polypeptide; Contains: RecName: Full=Saposin-A; AltName: Full=Protein A; Contains: RecName: Full=Saposin-B-Val; Contains: RecName: Full=Saposin-B; AltName: Full=Cerebroside sulfate activator; Short=CSAct; AltName: Full=Dispersin; AltName: Full=Sphingolipid activator protein 1; Short=SAP-1; AltName: Full=Sulfatide/GM1 activator; Co…	-
Scaffold-31.68	456.829	429.623	497.492	365.491	412.029	423.927	365.171	383.168	310.998	protein_coding_gene	Scaffold-31	1256010	1267461	-	1780	-	- && P00787.2 RecName: Full=Cathepsin B; AltName: Full=Cathepsin B1; AltName: Full=RSG-2; Contains: RecName: Full=Cathepsin B light chain; Contains: RecName: Full=Cathepsin B heavy chain; Flags: Precursor && PF08127:Peptidase family C1 propeptide|PF00112:Papain family cysteine protease	Peptidase_C1
Scaffold-434.10	415.382	357.506	388.489	537.518	364.738	444.311	389.334	408.754	337.018	protein_coding_gene	Scaffold-434	134415	144380	+	1516	-	- && P91929.2 RecName: Full=NADH dehydrogenase [ubiquinone] 1 alpha subcomplex subunit 10, mitochondrial; AltName: Full=Complex I-42kD; Short=CI-42kD; AltName: Full=NADH-ubiquinone oxidoreductase 42 kDa subunit; Flags: Precursor && PF01712:Deoxynucleoside kinase	-
Scaffold-96.168	406.575	336.928	440.628	417.868	367.602	390.369	455.841	495.661	325.169	protein_coding_gene	Scaffold-96	3362009	3382296	-	881	-	- && - && -	-
Scaffold-14.109	396.432	350.451	316.541	751.985	400.377	424.457	350.705	348.721	291.963	protein_coding_gene	Scaffold-14	2276088	2276843	-	756	-	- && Q4V8X4.1 RecName: Full=Acyl-CoA-binding domain-containing protein 6 && PF13637:Ankyrin repeats (many copies)|PF00887:Acyl CoA binding protein	-
Scaffold-132.5	383.515	351.947	407.294	660.739	352.67	397.684	375.841	382.2	302.231	protein_coding_gene	Scaffold-132	69205	157590	+	5553	-	- && Q3U1V8.2 RecName: Full=Mitogen-activated protein kinase kinase kinase 9 && PF00647:Elongation factor 1 gamma, conserved domain|PF02798:Glutathione S-transferase, N-terminal domain|PF07714:Protein tyrosine kinase|PF00043:Glutathione S-transferase, C-terminal domain|PF00018:SH3 domain|PF12974:ABC transporter, phosphonate, periplasmic substrate-binding protein	Pkinase_Tyr
Scaffold-1.112	395.599	331.875	354.307	635.711	361.893	383.72	418.018	374.547	332.334	protein_coding_gene	Scaffold-1	1981624	1993174	-	1349	-	- && Q17D30.1 RecName: Full=Eukaryotic translation initiation factor 3 subunit M; Short=eIF3m && PF01399:PCI domain	-
Scaffold-51.67	420.94	353.865	377.187	360.332	403.291	444.695	426.659	434.277	355.036	protein_coding_gene	Scaffold-51	1566878	1578291	-	2193	-	- && Q3SZ71.1 RecName: Full=Mitochondrial-processing peptidase subunit beta; AltName: Full=Beta-MPP; Flags: Precursor && PF00675:Insulinase (Peptidase family M16)|PF05193:Peptidase M16 inactive domain	-
Scaffold-727.2	390.613	320.274	360.474	643.499	329.157	405.955	436.89	357.06	331.002	protein_coding_gene	Scaffold-727	65697	77873	+	924	-	- && P48555.2 RecName: Full=Ras-related protein Ral-a; Flags: Precursor && PF00071:Ras family|PF04418:Domain of unknown function (DUF543)	Ras
Scaffold-133.134	400.575	305.324	348.639	644.232	347.106	431.582	392.836	388.427	292.827	protein_coding_gene	Scaffold-133	2002195	2011599	-	1502	-	- && O60044.2 RecName: Full=Cytochrome b-c1 complex subunit 2, mitochondrial; AltName: Full=Complex III subunit 2; AltName: Full=Core protein II; AltName: Full=Ubiquinol-cytochrome-c reductase complex core protein 2; Flags: Precursor && PF05193:Peptidase M16 inactive domain|PF00675:Insulinase (Peptidase family M16)	-
Scaffold-399.7	424.537	420.576	431.181	487.375	378.323	383.822	355.67	361.374	302.224	protein_coding_gene	Scaffold-399	118118	160298	-	5220	-	- && Q9GV28.1 RecName: Full=Chitinase-like protein EN03; AltName: Full=Imaginal disk growth factor-like protein; Flags: Precursor && PF00083:Sugar (and other) transporter|PF00704:Glycosyl hydrolases family 18	Sugar_tr
Scaffold-72.526	464.033	369.449	452.245	178.343	364.138	370.246	458.995	490.402	374.424	protein_coding_gene	Scaffold-72	10411855	10458366	+	2606	-	- && O62619.2 RecName: Full=Pyruvate kinase; Short=PK && PF02887:Pyruvate kinase, alpha/beta domain|PF00224:Pyruvate kinase, barrel domain	PK
Scaffold-24.148	409.975	346.515	344.304	593.747	339.677	421.334	394.368	343.633	311.943	protein_coding_gene	Scaffold-24	3753451	3762660	+	807	-	- && P51970.3 RecName: Full=NADH dehydrogenase [ubiquinone] 1 alpha subcomplex subunit 8; AltName: Full=Complex I-19kD; Short=CI-19kD; AltName: Full=Complex I-PGIV; Short=CI-PGIV; AltName: Full=NADH-ubiquinone oxidoreductase 19 kDa subunit >Q0MQB0.3 RecName: Full=NADH dehydrogenase [ubiquinone] 1 alpha subcomplex subunit 8; AltName: Full=Complex I-19kD; Short=CI-19kD; AltName: Full=NADH-ubiquinon…	-
Scaffold-12.84	398.377	228.112	325.732	762.928	333.324	385.865	368.095	333.436	327.57	EVM%20prediction%20Scaffold-12.84	Scaffold-12	1994408	1995759	+	245	-	- && O74882.1 RecName: Full=Succinate dehydrogenase cytochrome B subunit, mitochondrial; Flags: Precursor && PF01127:Succinate dehydrogenase/Fumarate reductase transmembrane subunit	-
Scaffold-240.18	368.502	371.256	357.371	520.23	454.555	365.717	306.58	318.521	392.613	protein_coding_gene	Scaffold-240	194902	214398	-	2547	-	- && P30101.4 RecName: Full=Protein disulfide-isomerase A3; AltName: Full=58 kDa glucose-regulated protein; AltName: Full=58 kDa microsomal protein; Short=p58; AltName: Full=Disulfide isomerase ER-60; AltName: Full=Endoplasmic reticulum resident protein 57; Short=ER protein 57; Short=ERp57; AltName: Full=Endoplasmic reticulum resident protein 60; Short=ER protein 60; Short=ERp60; Flags: Precursor…	-
Scaffold-24.13	386.221	317.172	391.209	424.302	362.643	380.932	423.538	373.176	350.163	protein_coding_gene	Scaffold-24	175491	189400	+	1821	-	- && Q01604.2 RecName: Full=Phosphoglycerate kinase && PF00162:Phosphoglycerate kinase	-
Scaffold-91.23	457.026	340.532	336.76	482.83	352.913	358.777	407.588	339.924	320.456	protein_coding_gene	Scaffold-91	391408	400145	-	1709	-	- && Q9IA79.1 RecName: Full=Probable Bax inhibitor 1; Short=BI-1; AltName: Full=Testis-enhanced gene transcript protein homolog; AltName: Full=Transmembrane BAX inhibitor motif-containing protein 6 && PF01027:Inhibitor of apoptosis-promoting Bax1	-
Scaffold-24.174	366.015	309.124	264.307	668.742	301.809	404.791	422.909	332.379	324.597	protein_coding_gene	Scaffold-24	4621740	4627707	+	533	-	- && Q05752.2 RecName: Full=NADH dehydrogenase [ubiquinone] 1 alpha subcomplex subunit 7; AltName: Full=Complex I-B14.5a; Short=CI-B14.5a; AltName: Full=NADH-ubiquinone oxidoreductase subunit B14.5a && PF07347:NADH:ubiquinone oxidoreductase subunit B14.5a (Complex I-B14.5a)	-
Scaffold-157.41	388.375	383.154	394.935	356.412	360.487	377.256	389.874	383.952	336.971	protein_coding_gene	Scaffold-157	723513	749156	+	2679	-	- && Q94920.3 RecName: Full=Voltage-dependent anion-selective channel; AltName: Full=DmVDAC; AltName: Full=Porin && PF01459:Eukaryotic porin|PF00665:Integrase core domain	rve
Scaffold-147.49	345.401	370.525	328.669	434.46	434.382	421.406	318.193	370.997	342.665	protein_coding_gene	Scaffold-147	1120792	1148206	-	2664	-	- && Q92841.2 RecName: Full=Probable ATP-dependent RNA helicase DDX17; AltName: Full=DEAD box protein 17; AltName: Full=DEAD box protein p72; AltName: Full=RNA-dependent helicase p72 && PF00271:Helicase conserved C-terminal domain|PF00352:Transcription factor TFIID (or TATA-binding protein, TBP)|PF00270:DEAD/DEAH box helicase	DEAD
Scaffold-97.73	366.544	295.103	367.36	599.228	380.623	335.804	396.039	384.204	236.755	protein_coding_gene	Scaffold-97	1383414	1401860	+	973	-	- && P22465.3 RecName: Full=Annexin B10; AltName: Full=Annexin X; AltName: Full=Annexin-10 && PF00191:Annexin	-
Scaffold-296.29	305.19	334.17	404.669	431.794	352.509	420.33	415.105	333.057	334.076	protein_coding_gene	Scaffold-296	402171	435798	+	1206	-	- && P47947.2 RecName: Full=Troponin C, isoform 1 && PF00036:EF hand|PF13499:EF-hand domain pair	efhand
Scaffold-26.47	330.57	338.237	350.589	385.256	363.698	396.615	407.897	388.708	368.024	protein_coding_gene	Scaffold-26	858250	869352	+	2015	-	- && P80317.3 RecName: Full=T-complex protein 1 subunit zeta; Short=TCP-1-zeta; AltName: Full=CCT-zeta-1 && PF00118:TCP-1/cpn60 chaperonin family	-
Scaffold-11.157	368.248	313.896	353.591	468.322	378.991	379.82	363.87	346.62	342.583	protein_coding_gene	Scaffold-11	2979926	2992818	+	2234	-	- && - && PF05283:Multi-glycosylated core protein 24 (MGC-24), sialomucin	-
Scaffold-72.24	310.382	296.785	287.754	689.905	299.808	337.093	377.965	448.411	225.228	protein_coding_gene	Scaffold-72	305269	326784	-	794	-	- && - && -	-
Scaffold-274.6	417.169	327.773	431.784	436.578	358.901	329.63	330.786	338.052	293.725	protein_coding_gene	Scaffold-274	61806	74977	-	2090	-	- && Q03168.2 RecName: Full=Lysosomal aspartic protease; Flags: Precursor && PF00026:Eukaryotic aspartyl protease	Asp
Scaffold-33.159	380.079	362.672	349.33	339.191	351.329	367.95	351.886	378.472	322.103	protein_coding_gene	Scaffold-33	2749070	2753254	-	690	-	- && O46577.1 RecName: Full=Cytochrome c oxidase subunit 4 isoform 1, mitochondrial; AltName: Full=Cytochrome c oxidase polypeptide IV; AltName: Full=Cytochrome c oxidase subunit IV isoform 1; Short=COX IV-1 && PF02936:Cytochrome c oxidase subunit IV	COX4
Scaffold-147.40	1079.26	68.7274	482.214	69.4925	571.612	409.599	163.863	317.204	30.0482	protein_coding_gene	Scaffold-147	788507	792048	-	867	-	- && - && -	-
Scaffold-109.8	307.297	372.118	339.899	431.925	301.896	501.055	290.586	356.753	280.23	protein_coding_gene	Scaffold-109	226614	237115	+	1072	-	- && - && PF06585:Haemolymph juvenile hormone binding protein (JHBP)	-
Scaffold-17.245	400.99	279.511	271.572	598.84	305.624	333.02	368.641	343.043	268.147	protein_coding_gene	Scaffold-17	5327198	5333986	-	563	-	- && - && PF15880:NADH dehydrogenase [ubiquinone] flavoprotein 3, mitochondrial	-
Scaffold-33.26	371.903	323.898	360.943	370.644	287.967	431.848	386.792	352.83	276.655	protein_coding_gene	Scaffold-33	278689	289759	+	1239	-	- && A9ZSY3.1 RecName: Full=Facilitated trehalose transporter Tret1; Short=BmTRET1 && PF00083:Sugar (and other) transporter	Sugar_tr
Scaffold-207.33	357.953	288.475	263.312	586.123	308.633	371.98	361.77	279.765	330.626	protein_coding_gene	Scaffold-207	730350	740262	-	637	-	- && - && PF04568:Mitochondrial ATPase inhibitor, IATP	-
Scaffold-24.313	352.126	323.813	338.102	372.837	339.861	380.462	377.296	332.102	326.881	protein_coding_gene	Scaffold-24	7794062	7809295	+	1683	-	- && Q641Y2.1 RecName: Full=NADH dehydrogenase [ubiquinone] iron-sulfur protein 2, mitochondrial; AltName: Full=Complex I-49kD; Short=CI-49kD; AltName: Full=NADH-ubiquinone oxidoreductase 49 kDa subunit; Flags: Precursor && PF00346:Respiratory-chain NADH dehydrogenase, 49 Kd subunit	-
Scaffold-391.4	341.061	327.594	326.513	334.574	456.902	379.687	298.15	288.184	341.331	protein_coding_gene	Scaffold-391	50807	57374	-	1106	-	- && P40423.1 RecName: Full=Myosin regulatory light chain sqh; AltName: Full=Myosin regulatory light chain, nonmuscle; Short=MRLC-C; AltName: Full=Protein spaghetti-squash && PF13499:EF-hand domain pair	-
Scaffold-87.24	318.907	319.127	293.419	502.02	339.031	387.21	303.478	285.238	314.702	protein_coding_gene	Scaffold-87	512683	518281	+	1323	-	- && B4JYJ2.1 RecName: Full=CDGSH iron-sulfur domain-containing protein 2 homolog && PF10660:Iron-containing outer mitochondrial membrane protein N-terminus|PF09360:Iron-binding zinc finger CDGSH type	-
Scaffold-68.55	320.739	287.723	302.048	462.142	362.016	383.559	309.353	300.463	332.773	protein_coding_gene	Scaffold-68	1213546	1255072	-	4602	-	- && Q9GLW9.1 RecName: Full=Peroxiredoxin-5, mitochondrial; AltName: Full=Peroxiredoxin V; Short=Prx-V; AltName: Full=Thioredoxin reductase; Flags: Precursor && PF08534:Redoxin|PF00379:Insect cuticle protein	Chitin_bind_4
Scaffold-183.3	345.978	240.544	265.964	627.139	308.541	344.393	302.552	320.392	295.255	protein_coding_gene	Scaffold-183	59354	72885	+	936	-	- && - && -	-
Scaffold-77.44	182.163	310.525	190.264	102.973	547.376	570.41	407.621	344.071	387.629	protein_coding_gene	Scaffold-77	583966	587480	-	387	-	- && - && -	-
Scaffold-661.3	324.783	253.128	326.866	593.202	363.669	312.252	286.746	329.111	251.358	protein_coding_gene	Scaffold-661	10225	25466	+	1664	-	- && Q9GKZ4.3 RecName: Full=Translocating chain-associated membrane protein 1 && PF03798:TLC domain	LAG1
Scaffold-17.154	288.879	277.078	304.835	546.709	331.055	377.803	316.427	291.905	298.351	protein_coding_gene	Scaffold-17	3286857	3310910	+	1028	-	- && Q9Z2U1.1 RecName: Full=Proteasome subunit alpha type-5; AltName: Full=Macropain zeta chain; AltName: Full=Multicatalytic endopeptidase complex zeta chain; AltName: Full=Proteasome zeta chain >P28066.3 RecName: Full=Proteasome subunit alpha type-5; AltName: Full=Macropain zeta chain; AltName: Full=Multicatalytic endopeptidase complex zeta chain; AltName: Full=Proteasome zeta chain >Q5E987.1 R…	Proteasome
Scaffold-42.46	303.311	278.991	297.631	567.368	305.034	348.686	344.419	307.656	276.998	protein_coding_gene	Scaffold-42	942656	967247	-	740	-	- && O16228.1 RecName: Full=Glutathione-independent glyoxalase DJR-1.2; AltName: Full=Protein DJ-1 homolog 2 && PF01965:DJ-1/PfpI family	DJ-1_PfpI
Scaffold-185.41	326.659	293.533	291.064	429.87	362.466	346.704	327.085	312.963	322.255	protein_coding_gene	Scaffold-185	594832	604698	+	2109	-	- && Q05974.1 RecName: Full=Ras-related protein Rab-1A && PF00071:Ras family	Ras
Scaffold-541.12	353.308	306.14	309.402	589.067	316.279	371.871	294.993	209.556	248.62	protein_coding_gene	Scaffold-541	188333	198308	+	1353	-	- && Q962S0.1 RecName: Full=40S ribosomal protein S7 [Spodoptera frugiperda] && PF01251:Ribosomal protein S7e|PF00153:Mitochondrial carrier protein	Mito_carr
Scaffold-67.157	362.422	237.97	282.224	556.259	291.972	339.358	321.223	287.134	290.439	protein_coding_gene	Scaffold-67	1952670	1953904	-	597	-	- && Q9XZS3.1 RecName: Full=Translation machinery-associated protein 7 homolog; AltName: Full=Coiled-coil domain-containing protein 72 homolog && PF09072:Translation machinery associated TMA7	-
Scaffold-222.9	301.242	373.847	395.827	382.881	287.333	291.392	337.463	330.753	267.605	protein_coding_gene	Scaffold-222	315050	326376	+	2386	-	- && Q8JFP1.1 RecName: Full=Eukaryotic initiation factor 4A-II; Short=eIF-4A-II; Short=eIF4A-II; AltName: Full=ATP-dependent RNA helicase eIF4A-2 && PF00270:DEAD/DEAH box helicase|PF00271:Helicase conserved C-terminal domain	DEAD
Scaffold-9.322	309.783	302.831	344.308	362.11	341.912	323.104	351.748	310.264	311.454	protein_coding_gene	Scaffold-9	5803752	5807944	+	345	-	- && - && -	-
Scaffold-188.11	248.656	242.928	267.541	820.892	223.062	373.433	314.173	250.239	208.527	protein_coding_gene	Scaffold-188	287886	301945	-	1026	-	- && - && -	-
Scaffold-12.83	317.328	397.965	265.862	373.497	329.093	344.621	360.891	280.274	269.945	EVM%20prediction%20Scaffold-12.83	Scaffold-12	1991599	1992490	+	257	-	- && - && PF01127:Succinate dehydrogenase/Fumarate reductase transmembrane subunit	-
Scaffold-13.67	312.794	287.297	283.451	557.475	283.153	352.872	315.34	290.222	245.052	protein_coding_gene	Scaffold-13	930655	941523	-	1266	-	- && Q9NBX4.1 RecName: Full=Probable RNA-directed DNA polymerase from transposon X-element; AltName: Full=Reverse transcriptase && PF00078:Reverse transcriptase (RNA-dependent DNA polymerase)|PF09782:NADH:ubiquinone oxidoreductase, NDUFB6/B17 subunit	RVT_1
Scaffold-6.161	52.9068	272.634	547.749	150.005	358.909	509.984	406.741	470.657	147.371	protein_coding_gene	Scaffold-6	2695946	2696509	+	564	-	- && - && -	-
Scaffold-96.147	188.134	307.536	214.989	106.704	478.361	425.701	354.824	454.839	350.596	protein_coding_gene	Scaffold-96	3184585	3195330	-	1236	-	- && - && -	-
Scaffold-79.20	308.32	277.795	270.133	425.807	330.216	351.783	302.822	324.773	278.842	protein_coding_gene	Scaffold-79	260263	279160	+	2642	-	- && P29845.2 RecName: Full=Heat shock 70 kDa protein cognate 5 && PF10712:NAD-specific glutamate dehydrogenase|PF00012:Hsp70 protein	HSP70
Scaffold-13.92	313.141	278.235	286.696	546.008	300.506	322.45	238.262	277.204	287.826	protein_coding_gene	Scaffold-13	1365171	1370684	-	1175	-	- && P80311.4 RecName: Full=Peptidyl-prolyl cis-trans isomerase B; Short=PPIase B; AltName: Full=Cyclophilin B; AltName: Full=Rotamase B; AltName: Full=S-cyclophilin; Short=SCYLP; Flags: Precursor && PF00160:Cyclophilin type peptidyl-prolyl cis-trans isomerase/CLD	Pro_isomerase
Scaffold-26.138	256.513	271.265	260.713	517.911	280.257	322.795	370.667	314.402	248.232	protein_coding_gene	Scaffold-26	2688439	2697651	+	1116	-	- && A4FV84.1 RecName: Full=mRNA turnover protein 4 homolog; AltName: Full=Ribosome assembly factor MRTO4 && PF00466:Ribosomal protein L10	-
Scaffold-15.299	344.43	305.333	304.322	670.856	311.051	206.574	245.102	206.88	246.663	protein_coding_gene	Scaffold-15	6932587	6967210	-	6072	-	- && Q05808.1 RecName: Full=Vitellogenin; Contains: RecName: Full=YP47; Contains: RecName: Full=YP160; Flags: Precursor && PF00094:von Willebrand factor type D domain|PF01347:Lipoprotein amino terminal region	Vitellogenin_N
Scaffold-248.24	623.948	119.642	3.81119	2.94664	1036.03	540.524	25.5774	21.9835	466.074	protein_coding_gene	Scaffold-248	313815	315595	-	483	-	- && P80233.1 RecName: Full=Cuticle protein 67, isoform B; AltName: Full=LM-ACP 67B; Short=LM-67B [Locusta migratoria] && PF11018:Pupal cuticle protein C1	-
Scaffold-208.25	293.629	272.449	275.2	546.752	278.313	329.208	291.004	284.393	268.959	protein_coding_gene	Scaffold-208	602556	615199	-	964	-	- && P56571.2 RecName: Full=ES1 protein homolog, mitochondrial; Flags: Precursor && -	-
Scaffold-94.23	305.594	278.732	275.456	502.032	283.944	325.241	324.232	273.475	269.323	protein_coding_gene	Scaffold-94	492891	506415	-	1311	-	- && O00217.1 RecName: Full=NADH dehydrogenase [ubiquinone] iron-sulfur protein 8, mitochondrial; AltName: Full=Complex I-23kD; Short=CI-23kD; AltName: Full=NADH-ubiquinone oxidoreductase 23 kDa subunit; AltName: Full=TYKY subunit; Flags: Precursor >Q0MQI3.1 RecName: Full=NADH dehydrogenase [ubiquinone] iron-sulfur protein 8, mitochondrial; AltName: Full=Complex I-23kD; Short=CI-23kD; AltName: Fu…	-
Scaffold-31.158	301.737	255.113	291.996	509.378	260.484	313.346	348.204	278.31	255.962	protein_coding_gene	Scaffold-31	3014357	3044896	-	1325	-	- && B4PAR6.1 RecName: Full=Adenylate kinase; AltName: Full=ATP-AMP transphosphorylase; AltName: Full=ATP:AMP phosphotransferase; AltName: Full=Adenylate kinase cytosolic and mitochondrial; AltName: Full=Adenylate monophosphate kinase && PF00406:Adenylate kinase|PF05191:Adenylate kinase, active site lid	ADK
Scaffold-82.17	329.55	252.446	303.172	394.478	295.55	320.417	329.967	307.515	245.472	protein_coding_gene	Scaffold-82	262466	292697	-	2198	-	- && P15690.1 RecName: Full=NADH-ubiquinone oxidoreductase 75 kDa subunit, mitochondrial; AltName: Full=Complex I-75kD; Short=CI-75kD; Flags: Precursor && PF10588:NADH-ubiquinone oxidoreductase-G iron-sulfur binding region|PF13510:2Fe-2S iron-sulfur cluster binding domain|PF09326:NADH-ubiquinone oxidoreductase subunit G, C-terminal|PF00384:Molybdopterin oxidoreductase	-
Scaffold-9.136	271.291	267.849	208.493	611.786	266.712	308.02	298.643	255.191	238.182	protein_coding_gene	Scaffold-9	2303437	2308742	-	617	-	- && Q3T0J3.1 RecName: Full=39S ribosomal protein L16, mitochondrial; Short=L16mt; Short=MRP-L16; Flags: Precursor && PF00252:Ribosomal protein L16p/L10e	-
Scaffold-178.6	235.914	272.666	183.778	167.87	354.375	459.164	318.2	345.85	372.36	protein_coding_gene	Scaffold-178	140405	196796	-	2827	-	- && - && PF01522:Polysaccharide deacetylase|PF00057:Low-density lipoprotein receptor domain class A	Polysacc_deac_1
Scaffold-87.73	340.978	272.137	352.699	392.219	339.355	235.591	359.328	231.692	184.897	protein_coding_gene	Scaffold-87	1542361	1556933	+	1874	-	- && Q8TBG4.1 RecName: Full=Ethanolamine-phosphate phospho-lyase; AltName: Full=Alanine--glyoxylate aminotransferase 2-like 1 && PF00202:Aminotransferase class-III	Aminotran_3
Scaffold-428.8	312.79	244.327	253.065	471.744	264.952	326.922	292.03	269.776	268.949	protein_coding_gene	Scaffold-428	126682	129518	+	534	-	- && - && PF15884:Protein QIL1	-
Scaffold-86.62	339.841	284.307	263.08	383.18	290.4	309.75	282.535	262.737	282.245	protein_coding_gene	Scaffold-86	1338519	1356324	+	2009	-	- && - && PF04089:BRICHOS domain	-
Scaffold-67.9	185.722	349.135	201.384	555.627	327.093	265.263	298.549	289.026	224.849	protein_coding_gene	Scaffold-67	115923	121921	+	699	-	- && - && -	-
Scaffold-570.7	254.687	239.217	233.451	564.676	203.211	411.402	325.331	228.881	232.562	protein_coding_gene	Scaffold-570	144193	179045	+	1398	-	- && Q07130.2 RecName: Full=UTP--glucose-1-phosphate uridylyltransferase; AltName: Full=UDP-glucose pyrophosphorylase; Short=UDPGP; Short=UGPase && PF01704:UTP--glucose-1-phosphate uridylyltransferase	-
Scaffold-385.15	290.4	239.768	247.838	473.906	268.797	301.852	322.932	270.239	273.11	protein_coding_gene	Scaffold-385	309433	321547	+	1572	-	- && Q9Y2X3.1 RecName: Full=Nucleolar protein 58; AltName: Full=Nucleolar protein 5 && PF01798:snoRNA binding domain, fibrillarin	-
Scaffold-9.160	334.408	238.361	327.849	331.247	231.72	319.711	313.547	268.932	302.592	protein_coding_gene	Scaffold-9	2736548	2756619	+	1299	-	- && - && -	-
Scaffold-41.45	296.03	273.841	278.516	403.694	305.157	283.497	303.105	261.271	259.399	protein_coding_gene	Scaffold-41	1499562	1507067	-	2073	-	- && P0CG48.3 RecName: Full=Polyubiquitin-C; Contains: RecName: Full=Ubiquitin; Flags: Precursor && PF00240:Ubiquitin family	ubiquitin
Scaffold-108.1	305.477	244.843	256.443	411.331	268.937	330.557	311.888	280.318	233.789	protein_coding_gene	Scaffold-108	7974	14308	-	1078	-	- && Q9H3L0.2 RecName: Full=Methylmalonic aciduria and homocystinuria type D protein, mitochondrial; AltName: Full=CblD; Flags: Precursor && PF10229:Uncharacterized conserved protein (DUF2246)	-
Scaffold-14.5	266.772	242.177	263.763	459.404	319.831	315.807	281.423	259.543	234.042	protein_coding_gene	Scaffold-14	131975	139343	+	959	-	- && Q05856.1 RecName: Full=Small nuclear ribonucleoprotein-associated protein B; Short=snRNP-B; AltName: Full=Sm protein B; Short=Sm-B; Short=SmB && PF01423:LSM domain	LSM
Scaffold-8.175	236.417	288.95	324.187	410.989	259.888	299.732	340.765	247.359	231.206	protein_coding_gene	Scaffold-8	3262999	3274222	-	1147	-	- && - && PF06585:Haemolymph juvenile hormone binding protein (JHBP)	-
Scaffold-23.119	303.899	267.163	272.257	427.029	269.1	267.541	306.263	267.349	257.054	protein_coding_gene	Scaffold-23	2262014	2275382	+	2096	-	- && O35343.1 RecName: Full=Importin subunit alpha-3; AltName: Full=Importin alpha Q1; Short=Qip1; AltName: Full=Karyopherin subunit alpha-4 && PF00514:Armadillo/beta-catenin-like repeat|PF16186:Atypical Arm repeat|PF01749:Importin beta binding domain	Arm
Scaffold-298.24	100.941	519.831	51.1572	54.3724	387.374	579.713	214.378	430.46	280.898	protein_coding_gene	Scaffold-298	343350	357901	-	762	-	- && - && -	-
Scaffold-143.27	261.717	234.187	229.013	671.836	238.307	280.697	305.763	204.795	190.855	protein_coding_gene	Scaffold-143	513643	523214	-	809	-	- && Q29DG0.2 RecName: Full=UPF0389 protein GA21628 && PF06388:Protein of unknown function (DUF1075)	-
Scaffold-1.196	264.905	269.168	289.707	191.026	289.326	358.592	292.356	371.889	264.427	protein_coding_gene	Scaffold-1	3710356	3799908	+	5414	-	- && P05661.4 RecName: Full=Myosin heavy chain, muscle && PF01576:Myosin tail|PF00063:Myosin head (motor domain)|PF02736:Myosin N-terminal SH3-like domain	Myosin_tail_1
Scaffold-230.23	298.548	321.518	313.599	146.708	318.561	273.696	300.37	287.233	325.247	protein_coding_gene	Scaffold-230	336806	340756	-	1107	-	- && P54611.1 RecName: Full=V-type proton ATPase subunit E; Short=V-ATPase subunit E; AltName: Full=V-ATPase 26 kDa subunit; AltName: Full=Vacuolar proton pump subunit E && PF01991:ATP synthase (E/31 kDa) subunit	-
Scaffold-41.22	267.19	255.072	258.324	562.643	223.945	222.497	299.031	253.652	242.094	protein_coding_gene	Scaffold-41	784386	876125	+	6755	-	- && Q5ICW4.1 RecName: Full=Growth factor receptor-bound protein 14; AltName: Full=GRB14 adapter protein && PF00017:SH2 domain|PF08947:BPS (Between PH and SH2)	SH2
Scaffold-33.14	115.19	266.995	132.666	63.4125	389.376	473.587	437.306	299.176	392.243	protein_coding_gene	Scaffold-33	122600	138620	+	1803	-	- && P82119.1 RecName: Full=Cuticle protein 6; AltName: Full=BcNCP14.9 [Blaberus craniifer] && PF00379:Insect cuticle protein	Chitin_bind_4
Scaffold-48.66	281.237	283.105	250.226	413.548	251.314	302.895	280.557	254.51	247.829	protein_coding_gene	Scaffold-48	1219909	1250000	+	1824	-	- && Q8MKK4.1 RecName: Full=Facilitated trehalose transporter Tret1-2 homolog; Short=DmTret1-2 && PF00083:Sugar (and other) transporter	Sugar_tr
Scaffold-103.93	12.1846	5.26198	38.6938	16.4999	8.17154	17.8858	13.4253	7.15446	2445.17	protein_coding_gene	Scaffold-103	1587282	1590053	-	1083	-	- && - && -	-
Scaffold-19.95	325.165	232.911	228.597	510.429	266.572	227.408	297.232	264.653	197.04	protein_coding_gene	Scaffold-19	2025130	2028482	+	540	-	- && O35623.1 RecName: Full=BET1 homolog; Short=mBET1; AltName: Full=Golgi vesicular membrane-trafficking protein p18 && -	-
Scaffold-153.30	251.551	186.479	168.295	278.168	526.118	422.721	189.63	237.92	285.708	protein_coding_gene	Scaffold-153	780223	784599	-	1328	-	- && - && -	-
Scaffold-112.58	246.086	278.842	292.157	401.139	263.413	263.898	267.532	257.866	269.651	protein_coding_gene	Scaffold-112	1066561	1099120	-	2100	-	- && Q6GQ29.1 RecName: Full=Carboxypeptidase Q; AltName: Full=Plasma glutamate carboxypeptidase; Flags: Precursor && PF04389:Peptidase family M28	-
Scaffold-82.25	247.986	210.138	232.178	618.113	235.307	261.217	289.363	222.442	222.791	protein_coding_gene	Scaffold-82	523027	527291	+	756	-	- && Q9W3Y0.1 RecName: Full=Zinc finger protein 593 homolog && PF12171:Zinc-finger double-stranded RNA-binding	-
Scaffold-10.116	235.063	220.658	219.3	606.589	227.157	316.871	256.532	212.09	238.569	protein_coding_gene	Scaffold-10	2264744	2266169	-	396	-	- && - && -	-
Scaffold-37.67	265.295	230.324	257.599	458.715	252.177	295.863	279.373	252.306	233.331	protein_coding_gene	Scaffold-37	1544076	1552839	-	665	-	- && Q0E959.1 RecName: Full=39S ribosomal protein L34, mitochondrial; Short=L34mt; Short=MRP-L34; Flags: Precursor && PF00468:Ribosomal protein L34	-
Scaffold-244.7	256.014	254.893	233.067	338.261	288.841	286.88	311.622	288.782	245.097	protein_coding_gene	Scaffold-244	113560	118459	-	899	-	- && Q9U616.1 RecName: Full=Glycine cleavage system H protein, mitochondrial; AltName: Full=Protein pumpless; Flags: Precursor && PF01597:Glycine cleavage H-protein	-
Scaffold-338.9	277.806	268.725	257.557	359.483	266.239	276.016	299.245	240.233	257.22	protein_coding_gene	Scaffold-338	201830	214631	-	1054	-	- && P63025.1 RecName: Full=Vesicle-associated membrane protein 3; Short=VAMP-3; AltName: Full=Cellubrevin; Short=CEB; AltName: Full=Synaptobrevin-3 >P63024.1 RecName: Full=Vesicle-associated membrane protein 3; Short=VAMP-3; AltName: Full=Cellubrevin; Short=CEB; AltName: Full=Synaptobrevin-3 && PF00957:Synaptobrevin	-
Scaffold-223.27	2474.36	1.16524	1.51444	6.26648	3.1335	3.6917	4.65181	1.33787	2.6693	protein_coding_gene	Scaffold-223	445273	447979	+	429	-	- && - && -	-
Scaffold-13.15	276.279	236.838	241.608	408.667	263.798	314.945	275.48	243.175	237.944	protein_coding_gene	Scaffold-13	200130	207632	+	1068	-	- && P25789.1 RecName: Full=Proteasome subunit alpha type-4; AltName: Full=Macropain subunit C9; AltName: Full=Multicatalytic endopeptidase complex subunit C9; AltName: Full=Proteasome component C9; AltName: Full=Proteasome subunit L >Q3ZCK9.1 RecName: Full=Proteasome subunit alpha type-4 && PF00227:Proteasome subunit|PF10584:Proteasome subunit A N-terminal signature	Proteasome
Scaffold-181.8	240.676	317.072	299.435	371.137	287.372	221.151	243.974	226.065	289.983	protein_coding_gene	Scaffold-181	123179	129337	+	980	-	- && - && -	-
Scaffold-313.5	292.095	260.75	231.181	298.341	282.148	309.302	268.356	264.296	267.55	protein_coding_gene	Scaffold-313	77468	122617	+	2919	-	- && P80311.4 RecName: Full=Peptidyl-prolyl cis-trans isomerase B; Short=PPIase B; AltName: Full=Cyclophilin B; AltName: Full=Rotamase B; AltName: Full=S-cyclophilin; Short=SCYLP; Flags: Precursor && PF00160:Cyclophilin type peptidyl-prolyl cis-trans isomerase/CLD|PF00313:'Cold-shock' DNA-binding domain	Pro_isomerase
Scaffold-21.56	260.044	250.164	240.346	451.951	240.775	299.481	261.158	226.89	241.154	protein_coding_gene	Scaffold-21	1031820	1035140	-	683	-	- && - && PF05348:Proteasome maturation factor UMP1	-
Scaffold-230.34	306.227	201.41	257.387	246.136	247.878	210.051	523.224	288.365	187.416	protein_coding_gene	Scaffold-230	497217	509937	+	1443	-	- && Q26636.1 RecName: Full=Cathepsin L; Contains: RecName: Full=Cathepsin L heavy chain; Contains: RecName: Full=Cathepsin L light chain; Flags: Precursor && PF08246:Cathepsin propeptide inhibitor domain (I29)|PF00112:Papain family cysteine protease	Peptidase_C1
Scaffold-147.50	253.294	210.764	261.439	489.902	237.543	277.813	280.274	237.959	218.259	protein_coding_gene	Scaffold-147	1150018	1155370	+	888	-	- && Q1HPS4.1 RecName: Full=Eukaryotic translation initiation factor 3 subunit K; Short=eIF3k; AltName: Full=eIF-3 p25 && PF10075:CSN8/PSMD8/EIF3K family	-
Scaffold-62.72	261.033	238.898	272.242	388.125	270.377	272.748	283.17	258.517	221.54	protein_coding_gene	Scaffold-62	1346148	1354737	-	2575	-	- && P47813.2 RecName: Full=Eukaryotic translation initiation factor 1A, X-chromosomal; Short=eIF-1A X isoform; AltName: Full=Eukaryotic translation initiation factor 4C; Short=eIF-4C >Q5RA42.3 RecName: Full=Eukaryotic translation initiation factor 1A, X-chromosomal; Short=eIF-1A X isoform; AltName: Full=Eukaryotic translation initiation factor 4C; Short=eIF-4C >Q8BMJ3.3 RecName: Full=Eukaryotic …	-
Scaffold-97.72	263.848	227.445	272.306	459.396	241.928	273.809	274.464	242.373	209.377	protein_coding_gene	Scaffold-97	1373789	1382469	+	1422	-	- && P48612.2 RecName: Full=Protein pelota && PF03464:eRF1 domain 2|PF03465:eRF1 domain 3|PF03463:eRF1 domain 1	-
Scaffold-63.26	260.534	245.877	222.255	397.619	276.639	274.831	275.748	242.955	229.997	protein_coding_gene	Scaffold-63	510518	514571	-	1180	-	- && - && PF10780:39S ribosomal protein L53/MRP-L53	-
Scaffold-243.17	162.081	246.154	313.075	323.286	278.373	348.398	256.268	302.574	192.767	protein_coding_gene	Scaffold-243	416594	417292	+	699	-	- && - && -	-
Scaffold-122.276	279.429	202.174	230.101	404.024	272.989	293.891	257.002	233.892	221.847	protein_coding_gene	Scaffold-122	4875459	4884130	+	856	-	- && P40301.1 RecName: Full=Proteasome subunit alpha type-2; AltName: Full=PROS-Dm25; AltName: Full=Proteasome 25 kDa subunit && PF10584:Proteasome subunit A N-terminal signature|PF00227:Proteasome subunit	Proteasome
Scaffold-20.298	247.771	248.06	241.12	394.844	221.09	290.791	239.843	264.08	245.582	protein_coding_gene	Scaffold-20	7529901	7543461	-	1592	-	- && Q5R7W2.1 RecName: Full=Phosphate carrier protein, mitochondrial; AltName: Full=Phosphate transport protein; Short=PTP; AltName: Full=Solute carrier family 25 member 3; Flags: Precursor && PF00153:Mitochondrial carrier protein	Mito_carr
Scaffold-6.295	257.477	336.249	253.955	254.775	246.832	186.071	295.242	234.157	305.532	protein_coding_gene	Scaffold-6	5127718	5142315	-	1170	-	- && P04634.1 RecName: Full=Gastric triacylglycerol lipase; Short=GL; Short=Gastric lipase; AltName: Full=Lingual lipase; Flags: Precursor && PF04083:Partial alpha/beta-hydrolase lipase region	-
Scaffold-45.44	315.383	205.385	225.347	330.569	239.465	328.268	189.6	231.031	297.643	protein_coding_gene	Scaffold-45	908888	927508	+	2688	-	- && P06603.1 RecName: Full=Tubulin alpha-1 chain && PF03953:Tubulin C-terminal domain|PF00091:Tubulin/FtsZ family, GTPase domain|PF02949:7tm Odorant receptor	Tubulin
Scaffold-42.78	235.949	226.741	238.96	382.984	255.374	254.818	290.338	235.491	220.683	protein_coding_gene	Scaffold-42	1387989	1388839	-	851	-	- && Q9VR89.1 RecName: Full=RNA-binding protein pno1 && -	-
Scaffold-443.6	581.699	472.004	37.2418	52.3313	265.487	430.616	46.279	54.4641	400.741	protein_coding_gene	Scaffold-443	92046	95493	-	692	-	- && P11734.1 RecName: Full=Cuticle protein 8; AltName: Full=LM-ACP 8; Short=LM-8 && PF00379:Insect cuticle protein	Chitin_bind_4
Scaffold-248.9	227.566	245.043	229.57	379.838	257.542	305.759	228.025	223.905	241.844	protein_coding_gene	Scaffold-248	107713	110520	-	408	-	- && B7Q1Q9.1 RecName: Full=Transcription initiation factor IIA subunit 2; AltName: Full=General transcription factor IIA subunit 2; AltName: Full=Transcription initiation factor IIA gamma chain; Short=TFIIA-gamma && PF02268:Transcription initiation factor IIA, gamma subunit, helical domain	-
Scaffold-50.92	281.141	206.035	242.239	311.416	240.422	234.672	289.993	262.883	262.778	protein_coding_gene	Scaffold-50	1260973	1270368	+	1628	-	- && P21914.2 RecName: Full=Succinate dehydrogenase [ubiquinone] iron-sulfur subunit, mitochondrial; AltName: Full=Iron-sulfur subunit of complex II; Short=Ip; Flags: Precursor && PF13085:2Fe-2S iron-sulfur cluster binding domain|PF13534:4Fe-4S dicluster domain	-
Scaffold-452.9	232.127	198.238	225.331	481.133	228.9	248.832	273.279	234.647	190.777	protein_coding_gene	Scaffold-452	149751	159550	-	1223	-	- && - && PF00076:RNA recognition motif. (a.k.a. RRM, RBD, or RNP domain)	RRM_1
Scaffold-452.11	210.621	225.094	208.116	551.649	222.426	233.441	230.983	236.103	191.683	protein_coding_gene	Scaffold-452	189510	204103	-	346	-	- && Q78P75.1 RecName: Full=Dynein light chain 2, cytoplasmic; AltName: Full=Dynein light chain LC8-type 2 >Q96FJ2.1 RecName: Full=Dynein light chain 2, cytoplasmic; AltName: Full=8 kDa dynein light chain b; Short=DLC8b; AltName: Full=Dynein light chain LC8-type 2 >Q9D0M5.1 RecName: Full=Dynein light chain 2, cytoplasmic; AltName: Full=8 kDa dynein light chain b; Short=DLC8; Short=DLC8b; AltName:…	-
Scaffold-102.21	100.85	186.101	117.408	111.939	352.64	461.524	342.036	259.387	376.349	protein_coding_gene	Scaffold-102	489215	490585	-	534	-	- && P82166.1 RecName: Full=Cuticle protein 19.8; AltName: Full=LmNCP19.8 && PF00379:Insect cuticle protein	Chitin_bind_4
Scaffold-261.7	390.473	60.1615	278.035	290.645	279.54	143.084	120.406	332.38	406.754	protein_coding_gene	Scaffold-261	245901	322219	+	2172	-	- && Q9NRM2.2 RecName: Full=Zinc finger protein 277; AltName: Full=Nuclear receptor-interacting factor 4 && PF12756:C2H2 type zinc-finger (2 copies)|PF00014:Kunitz/Bovine pancreatic trypsin inhibitor domain|PF00001:7 transmembrane receptor (rhodopsin family)	7tm_1
Scaffold-243.19	256.379	217.014	231.529	376.458	218.551	272	273.875	228.039	224.054	protein_coding_gene	Scaffold-243	437317	496822	-	3915	-	- && Q3SZI0.3 RecName: Full=Mannose-6-phosphate isomerase; AltName: Full=Phosphohexomutase; AltName: Full=Phosphomannose isomerase; Short=PMI && PF16020:Deltamethrin resistance|PF00170:bZIP transcription factor|PF01238:Phosphomannose isomerase type I	bZIP_1
Scaffold-329.23	193.139	252.196	220.468	428.346	240.865	233.774	243.139	251.64	220.945	protein_coding_gene	Scaffold-329	467932	476376	+	333	-	- && Q6J3Q7.3 RecName: Full=Cytochrome c oxidase copper chaperone && PF05051:Cytochrome C oxidase copper chaperone (COX17)	-
Scaffold-37.36	262.71	219.894	259.756	287.874	183.916	288.329	338.083	253.882	175.161	protein_coding_gene	Scaffold-37	767810	784445	+	1058	-	- && Q58DT4.1 RecName: Full=Pyrroline-5-carboxylate reductase 1, mitochondrial; Short=P5C reductase 1; Short=P5CR 1 && PF03807:NADP oxidoreductase coenzyme F420-dependent|PF14748:Pyrroline-5-carboxylate reductase dimerisation	F420_oxidored
Scaffold-96.135	282.512	189.77	225.166	400.688	226.979	241.198	281.316	252.399	167.843	protein_coding_gene	Scaffold-96	2922170	2946268	+	3475	-	- && Q6NVR8.1 RecName: Full=Protein LSM14 homolog A; AltName: Full=RNA-associated protein 55A; Short=RAP55A && PF09532:FDF domain|PF12701:Scd6-like Sm domain	-
Scaffold-302.7	274.117	267.295	224.62	231.65	208.306	295	289.998	259.501	211.36	protein_coding_gene	Scaffold-302	125552	129308	-	484	-	- && - && PF01395:PBP/GOBP family	-
Scaffold-23.112	313.7	152.845	279.041	481.53	312.725	199.004	217.325	135.123	162.177	protein_coding_gene	Scaffold-23	2107633	2113871	-	955	-	- && - && -	-
Scaffold-555.4	233.48	231.719	175.268	317.767	342.848	263.473	167.416	229.572	260.406	protein_coding_gene	Scaffold-555	127880	141021	+	2858	-	- && P29413.2 RecName: Full=Calreticulin; Flags: Precursor && PF00262:Calreticulin family	-
Scaffold-62.212	169.888	304.551	246.06	251.738	236.047	328.698	173.181	260.144	249.657	protein_coding_gene	Scaffold-62	3210023	3228725	-	2100	-	- && P07688.5 RecName: Full=Cathepsin B; AltName: Full=BCSB; Contains: RecName: Full=Cathepsin B light chain; Contains: RecName: Full=Cathepsin B heavy chain; Flags: Precursor && PF08127:Peptidase family C1 propeptide|PF00886:Ribosomal protein S16|PF00112:Papain family cysteine protease	Peptidase_C1
Scaffold-402.19	274.377	94.1818	0	0	830.022	722.128	3.0988	0.693172	294.235	protein_coding_gene	Scaffold-402	323844	328657	-	276	-	- && - && -	-
Scaffold-17.96	256.384	224.118	220.683	300.606	220.261	258.434	266.473	232.455	231.395	protein_coding_gene	Scaffold-17	1970261	1993753	-	3997	-	- && P40320.2 RecName: Full=S-adenosylmethionine synthase; Short=AdoMet synthase; AltName: Full=Methionine adenosyltransferase; Short=MAT && PF00438:S-adenosylmethionine synthetase, N-terminal domain|PF02773:S-adenosylmethionine synthetase, C-terminal domain|PF02772:S-adenosylmethionine synthetase, central domain	-
Scaffold-15.98	230.115	259.095	291.87	178.931	258.386	230.7	244.715	268.469	245.854	protein_coding_gene	Scaffold-15	2025280	2061167	+	2502	-	- && Q5NVR2.1 RecName: Full=Malate dehydrogenase, mitochondrial; Flags: Precursor && PF02866:lactate/malate dehydrogenase, alpha/beta C-terminal domain|PF00056:lactate/malate dehydrogenase, NAD binding domain|PF07690:Major Facilitator Superfamily	MFS_1
Scaffold-186.20	215.087	197.249	201.842	407.919	215.32	264.157	262.257	227.495	214.413	protein_coding_gene	Scaffold-186	337220	346437	+	1515	-	- && Q6GNS3.1 RecName: Full=60S ribosomal export protein NMD3 && PF04981:NMD3 family	-
Scaffold-12.215	139.309	318.142	264.381	198.486	251.569	261.863	293.172	238.898	225.616	protein_coding_gene	Scaffold-12	4652541	4661885	-	1164	-	- && - && -	-
Scaffold-449.8	238.105	188.21	218.427	519.721	209.601	243.303	217.833	168.84	187.301	protein_coding_gene	Scaffold-449	214141	214489	-	349	-	- && - && PF08285:Dolichol-phosphate mannosyltransferase subunit 3 (DPM3)	-
Scaffold-67.158	207.523	237.334	203.972	314.845	215.062	311.391	253.346	218.799	223.138	protein_coding_gene	Scaffold-67	1961118	1999804	-	1883	-	- && P49023.3 RecName: Full=Paxillin && PF00412:LIM domain	LIM
Scaffold-848.3	236.029	199.955	206.29	401.113	157.813	289.448	257.343	195.679	236.654	protein_coding_gene	Scaffold-848	26388	30949	+	548	-	- && Q5DC69.2 RecName: Full=10 kDa heat shock protein, mitochondrial; Short=Hsp10; AltName: Full=10 kDa chaperonin; AltName: Full=Chaperonin 10; Short=CPN10 && PF00166:Chaperonin 10 Kd subunit	-
Scaffold-269.6	228.49	226.989	188.559	296.386	369.471	235.883	170.187	252.486	211.763	protein_coding_gene	Scaffold-269	62981	73936	+	2807	-	- && P29844.2 RecName: Full=Heat shock 70 kDa protein cognate 3; AltName: Full=78 kDa glucose-regulated protein homolog; AltName: Full=GRP 78; AltName: Full=Heat shock protein cognate 72; Flags: Precursor && PF10712:NAD-specific glutamate dehydrogenase|PF00012:Hsp70 protein	HSP70
Scaffold-498.12	360.228	256.636	331.154	120.666	110.148	93.5304	581.374	233.126	87.7628	protein_coding_gene	Scaffold-498	174386	186280	+	1494	-	- && P55859.3 RecName: Full=Purine nucleoside phosphorylase; Short=PNP; AltName: Full=Inosine phosphorylase; AltName: Full=Inosine-guanosine phosphorylase && PF01048:Phosphorylase superfamily	-
Scaffold-3160.1	213.888	347.819	306.033	174.308	403.151	128.776	109.069	173.663	316.662	protein_coding_gene	Scaffold-3160	75	5863	+	3804	-	- && Q868N5.1 RecName: Full=Vitellogenin; Flags: Precursor && PF01347:Lipoprotein amino terminal region|PF09172:Domain of unknown function (DUF1943)	Vitellogenin_N
Scaffold-11.118	242.835	195.598	224.296	257.109	253.492	273.304	246.276	255.043	220.939	protein_coding_gene	Scaffold-11	2425548	2430128	+	2157	-	- && Q68FQ0.1 RecName: Full=T-complex protein 1 subunit epsilon; Short=TCP-1-epsilon; AltName: Full=CCT-epsilon && PF00118:TCP-1/cpn60 chaperonin family	-
Scaffold-57.89	197.345	266.956	210.376	372.628	206.506	291.018	228.128	196.329	198.232	protein_coding_gene	Scaffold-57	2197251	2273052	-	6106	-	- && P35044.1 RecName: Full=Trypsin alpha-4; Flags: Precursor && PF00089:Trypsin	Trypsin
Scaffold-72.504	220.309	218.653	211.545	326.131	238.647	248.297	247.489	245.872	207.325	protein_coding_gene	Scaffold-72	9930711	9943398	-	1941	-	- && K7IM66.1 RecName: Full=Eukaryotic translation initiation factor 3 subunit D; Short=eIF3d; AltName: Full=Eukaryotic translation initiation factor 3 subunit 7 && PF05091:Eukaryotic translation initiation factor 3 subunit 7 (eIF-3)	-
Scaffold-543.15	268.617	211.43	260.945	317.478	227.288	243.219	222.492	228.043	178.933	protein_coding_gene	Scaffold-543	192225	219771	+	1969	-	- && Q9VYY4.1 RecName: Full=Cytochrome P450 4g15; AltName: Full=CYPIVG15 && PF00067:Cytochrome P450	p450
Scaffold-22.31	328.165	148.778	252.8	288.798	208.597	175.691	192.466	243.709	306.432	protein_coding_gene	Scaffold-22	936339	951602	-	2567	-	- && - && -	-
Scaffold-45.60	200.15	270.642	141.416	117.779	285.016	324.076	252.547	232.418	319.335	protein_coding_gene	Scaffold-45	1320343	1327795	+	768	-	- && - && PF06585:Haemolymph juvenile hormone binding protein (JHBP)	-
Scaffold-20.281	234.779	209.999	207.789	422.78	219.186	236.142	216.963	195.028	190.637	protein_coding_gene	Scaffold-20	7147233	7153479	-	876	-	- && Q9R0Q3.1 RecName: Full=Transmembrane emp24 domain-containing protein 2; AltName: Full=COPI-coated vesicle membrane protein p24; AltName: Full=Membrane protein p24A; AltName: Full=Sid 394; AltName: Full=p24 family protein beta-1; Short=p24beta1; Flags: Precursor && PF01105:emp24/gp25L/p24 family/GOLD	-
Scaffold-35.124	210.33	199.851	205.535	444.985	216.243	250.364	211.199	187.338	206.727	protein_coding_gene	Scaffold-35	2290199	2295678	+	962	-	- && Q3ZBG0.1 RecName: Full=Proteasome subunit alpha type-7 && PF00227:Proteasome subunit|PF10584:Proteasome subunit A N-terminal signature	Proteasome
Scaffold-338.15	225.634	197.688	190.293	417.573	214.773	254.426	237.575	191.749	200.376	protein_coding_gene	Scaffold-338	290741	295170	+	882	-	- && Q9W2D6.1 RecName: Full=Mitochondrial import inner membrane translocase subunit Tim10 && PF02953:Tim10/DDP family zinc finger|PF15932:Domain of unknown function (DUF4748)	-
Scaffold-10.177	461.332	138.386	210.645	377.48	112.506	162.493	373.283	149.474	141.7	protein_coding_gene	Scaffold-10	3356795	3360603	-	695	-	- && Q27377.2 RecName: Full=Putative odorant-binding protein A10; AltName: Full=Antennal protein 10; AltName: Full=OS-D protein; Flags: Precursor && PF03392:Insect pheromone-binding family, A10/OS-D	-
Scaffold-698.4	290.119	248.679	292.288	97.0184	205.1	190.23	325.497	271.066	197.863	protein_coding_gene	Scaffold-698	64851	120387	-	8497	-	- && P12785.3 RecName: Full=Fatty acid synthase; Includes: RecName: Full=[Acyl-carrier-protein] S-acetyltransferase; Includes: RecName: Full=[Acyl-carrier-protein] S-malonyltransferase; Includes: RecName: Full=3-oxoacyl-[acyl-carrier-protein] synthase; Includes: RecName: Full=3-oxoacyl-[acyl-carrier-protein] reductase; Includes: RecName: Full=3-hydroxyacyl-[acyl-carrier-protein] dehydratase; Incl…	Acyl_transf_1
Scaffold-213.38	239.481	200.436	193.012	370.456	226.094	256.198	225.547	208.9	197.193	protein_coding_gene	Scaffold-213	512213	519593	+	1039	-	- && P70195.1 RecName: Full=Proteasome subunit beta type-7; AltName: Full=Macropain chain Z; AltName: Full=Multicatalytic endopeptidase complex chain Z; AltName: Full=Proteasome subunit Z; Flags: Precursor && PF00227:Proteasome subunit|PF12465:Proteasome beta subunits C terminal	Proteasome
Scaffold-13.14	223.355	179.913	208.993	425.199	207.855	246.918	231.594	189.532	201.755	protein_coding_gene	Scaffold-13	196391	198267	-	858	-	- && Q7SXW4.1 RecName: Full=ER membrane protein complex subunit 3; AltName: Full=Protein pob; AltName: Full=Transmembrane protein 111 && PF01956:Integral membrane protein DUF106	-
Scaffold-204.10	262.755	183.242	214.885	263.798	214.233	240.908	286.374	255.806	189.422	protein_coding_gene	Scaffold-204	209272	221429	-	1998	-	- && Q8BMF4.2 RecName: Full=Dihydrolipoyllysine-residue acetyltransferase component of pyruvate dehydrogenase complex, mitochondrial; AltName: Full=Dihydrolipoamide acetyltransferase component of pyruvate dehydrogenase complex; AltName: Full=Pyruvate dehydrogenase complex component E2; Short=PDC-E2; Short=PDCE2; Flags: Precursor && PF00364:Biotin-requiring enzyme|PF00198:2-oxoacid dehydrogenases …	Biotin_lipoyl
Scaffold-346.9	289.83	241.552	280.192	278.182	260.432	220.532	185.898	202.487	150.455	protein_coding_gene	Scaffold-346	127371	127732	+	274	-	- && - && -	-
Scaffold-426.21	221.447	190.05	189.858	400.645	217.224	277.723	208.301	206.025	195.878	protein_coding_gene	Scaffold-426	368151	369119	+	969	-	- && P99026.1 RecName: Full=Proteasome subunit beta type-4; AltName: Full=Low molecular mass protein 3; AltName: Full=Macropain beta chain; AltName: Full=Multicatalytic endopeptidase complex beta chain; AltName: Full=Proteasome beta chain; AltName: Full=Proteasome chain 3; Flags: Precursor && PF00227:Proteasome subunit	Proteasome
Scaffold-217.36	255.771	184.724	196.808	395.551	211.543	218.51	232.23	203.262	206.07	protein_coding_gene	Scaffold-217	747243	758583	+	1129	-	- && Q9VDD1.1 RecName: Full=DDRGK domain-containing protein 1; Flags: Precursor && PF09756:DDRGK domain	-
Scaffold-13.191	296.995	166.558	256	227.559	213.399	198.248	320.136	245.623	179.418	protein_coding_gene	Scaffold-13	3119013	3137334	+	2820	-	- && P31335.1 RecName: Full=Bifunctional purine biosynthesis protein PURH; Includes: RecName: Full=Phosphoribosylaminoimidazolecarboxamide formyltransferase; AltName: Full=5-aminoimidazole-4-carboxamide ribonucleotide formyltransferase; AltName: Full=AICAR transformylase; Includes: RecName: Full=IMP cyclohydrolase; AltName: Full=ATIC; AltName: Full=IMP synthase; AltName: Full=Inosinicase && PF021…	-
Scaffold-239.21	150.997	153.749	137.005	86.4668	314.556	448.843	320.271	231.166	257.476	protein_coding_gene	Scaffold-239	314225	323116	+	1229	-	- && P80681.1 RecName: Full=Larval cuticle protein A1A; AltName: Full=TM-LCP A1A; Short=TM-A1A && PF00379:Insect cuticle protein	Chitin_bind_4
Scaffold-103.91	40.746	26.3382	31.2914	114.139	29.5113	32.0939	32.8262	21.7287	1771.31	protein_coding_gene	Scaffold-103	1573202	1574425	-	744	-	- && - && -	-
Scaffold-18.26	223.584	208.426	204.252	313.628	238.532	242.294	216.757	203.046	238.729	protein_coding_gene	Scaffold-18	596376	600826	+	897	-	- && Q5ZMM5.1 RecName: Full=Zinc finger protein 706 && PF04419:4F5 protein family	-
Scaffold-175.49	236.597	163.803	174.316	460.996	188.238	241.803	232.568	200.198	187.447	protein_coding_gene	Scaffold-175	711780	719896	-	1120	-	- && Q18359.1 RecName: Full=Probable NADH dehydrogenase [ubiquinone] 1 alpha subcomplex subunit 5 && PF04716:ETC complex I subunit conserved region	-
Scaffold-298.25	58.3044	124.586	40.08	26.1447	507.107	542.092	281.337	167.947	321.664	protein_coding_gene	Scaffold-298	368207	391302	-	1621	-	- && - && -	-
Scaffold-473.14	225.226	204.034	188.552	339.089	230.51	246.682	216.252	214.73	193.799	protein_coding_gene	Scaffold-473	199347	205519	+	1005	-	- && P28072.4 RecName: Full=Proteasome subunit beta type-6; AltName: Full=Macropain delta chain; AltName: Full=Multicatalytic endopeptidase complex delta chain; AltName: Full=Proteasome delta chain; AltName: Full=Proteasome subunit Y; Flags: Precursor && PF00227:Proteasome subunit	Proteasome
Scaffold-172.34	209.023	224.127	233.448	264.922	204.049	245.461	219.691	239.762	217.685	protein_coding_gene	Scaffold-172	664216	702403	-	3098	-	- && Q7SY23.1 RecName: Full=Delta-1-pyrroline-5-carboxylate dehydrogenase, mitochondrial; Short=P5C dehydrogenase; AltName: Full=Aldehyde dehydrogenase family 4 member A1; AltName: Full=L-glutamate gamma-semialdehyde dehydrogenase; Flags: Precursor && PF00171:Aldehyde dehydrogenase family	Aldedh
Scaffold-224.59	193.268	149.331	131.453	101.181	312.413	391.719	230.796	184.965	361.493	protein_coding_gene	Scaffold-224	957358	964549	-	1416	-	- && Q7M4F3.1 RecName: Full=Endocuticle structural glycoprotein SgAbd-2 && PF00379:Insect cuticle protein	Chitin_bind_4
Scaffold-169.24	195.016	213.476	202.266	322.186	210.232	226.401	235.949	238.726	191.766	protein_coding_gene	Scaffold-169	516846	518830	-	1257	-	- && Q5R5J7.1 RecName: Full=Tubulin-specific chaperone C; AltName: Full=Tubulin-folding cofactor C; Short=CFC && PF16752:Tubulin-specific chaperone C N-terminal domain|PF07986:Tubulin binding cofactor C	-
Scaffold-384.2	223.115	165.968	261.249	353.306	133.443	244.112	253.233	225.505	164.993	protein_coding_gene	Scaffold-384	21492	51105	+	2118	-	- && Q07130.2 RecName: Full=UTP--glucose-1-phosphate uridylyltransferase; AltName: Full=UDP-glucose pyrophosphorylase; Short=UDPGP; Short=UGPase && PF01704:UTP--glucose-1-phosphate uridylyltransferase	-
Scaffold-72.363	198.277	192.89	189.782	345.889	195.413	266.898	245.242	206.977	174.557	protein_coding_gene	Scaffold-72	6745063	6751167	-	849	-	- && - && -	-
Scaffold-14.15	170.398	191.424	174.119	310.158	237.488	234.393	241.122	221.671	222.028	protein_coding_gene	Scaffold-14	347974	355133	-	750	-	- && P56707.1 RecName: Full=Selenocysteine methyltransferase; Short=SECYS-MT; Short=SECYS-methyltransferase && PF02574:Homocysteine S-methyltransferase	-
Scaffold-274.10	210.885	215.098	223.372	199.275	223.018	225.147	238.964	225.387	225.428	protein_coding_gene	Scaffold-274	103171	112503	+	2291	-	- && Q6EE31.3 RecName: Full=T-complex protein 1 subunit theta; Short=TCP-1-theta; AltName: Full=CCT-theta && PF00118:TCP-1/cpn60 chaperonin family	-
Scaffold-72.142	261.858	225.481	205.241	247.954	221.379	235.744	183.274	250.511	152.209	protein_coding_gene	Scaffold-72	2391197	2407500	+	2773	-	- && O16099.2 RecName: Full=Maltase 2; Flags: Precursor && PF00128:Alpha amylase, catalytic domain	-
Scaffold-22.79	188.446	248.133	219.116	103.419	229.321	269.253	234.304	254.221	232.518	protein_coding_gene	Scaffold-22	2064821	2069885	-	552	-	- && Q91WR8.2 RecName: Full=Glutathione peroxidase 6; Short=GPx-6; Short=GSHPx-6; Flags: Precursor && PF00255:Glutathione peroxidase	GSHPx
Scaffold-30.6	224.52	177.859	168.211	409.952	196.141	231.072	204.607	178.059	185.323	protein_coding_gene	Scaffold-30	165163	177901	-	1104	-	- && P40304.2 RecName: Full=Proteasome subunit beta type-1; AltName: Full=Proteasome 26 kDa subunit; Flags: Precursor && PF00227:Proteasome subunit	Proteasome
Scaffold-56.27	256.933	185.923	219.008	234.364	208.603	216.885	251.031	208.617	186.55	protein_coding_gene	Scaffold-56	734206	749486	+	2394	-	- && Q90XG0.1 RecName: Full=Triosephosphate isomerase B; Short=TIM-B; AltName: Full=Triose-phosphate isomerase B && PF00121:Triosephosphate isomerase	-
Scaffold-38.96	199.649	218.755	234.078	246.985	215.93	228.778	213.817	208.094	191.16	protein_coding_gene	Scaffold-38	1336839	1445976	+	8780	-	- && P54985.1 RecName: Full=Peptidyl-prolyl cis-trans isomerase; Short=PPIase; AltName: Full=Cyclophilin; AltName: Full=Cyclosporin A-binding protein; AltName: Full=Rotamase && PF01607:Chitin binding Peritrophin-A domain|PF00024:PAN domain|PF00089:Trypsin|PF00051:Kringle domain|PF00530:Scavenger receptor cysteine-rich domain|PF00160:Cyclophilin type peptidyl-prolyl cis-trans isomerase/CLD|PF00057…	Trypsin
Scaffold-486.3	152.862	170.846	186.276	307.956	199.369	270.487	193.102	277.276	198.201	protein_coding_gene	Scaffold-486	61673	70517	+	1312	-	- && Q58DW2.1 RecName: Full=Cystathionine gamma-lyase; AltName: Full=Cysteine-protein sulfhydrase; AltName: Full=Gamma-cystathionase && PF01053:Cys/Met metabolism PLP-dependent enzyme	Cys_Met_Meta_PP
Scaffold-38.129	213.764	187.802	199.171	318.905	205.969	221.79	219.146	188.547	200.937	protein_coding_gene	Scaffold-38	2145802	2150201	+	1382	-	- && P02272.2 RecName: Full=Histone H2A.V; AltName: Full=H2A.F/Z >Q71UI9.3 RecName: Full=Histone H2A.V; AltName: Full=H2A.F/Z >Q5BJ65.3 RecName: Full=Histone H2A.V; AltName: Full=H2A.F/Z >Q6GM74.3 RecName: Full=Histone H2A.V; AltName: Full=H2A.F/Z >Q6Y237.3 RecName: Full=Histone H2A.V; AltName: Full=H2A.F/Z >Q71PD7.3 RecName: Full=Histone H2A.V; AltName: Full=H2A.F/Z >Q3THW5.3 RecName: Full=Histo…	Histone
Scaffold-729.5	209.612	306.33	50.0701	15.4381	304.146	471.634	113.772	73.9518	410.666	protein_coding_gene	Scaffold-729	64362	77234	+	1516	-	- && - && -	-
Scaffold-395.4	220.97	210.133	259.609	134.701	224.51	231.25	232.902	220.265	217.686	protein_coding_gene	Scaffold-395	39224	40667	-	1444	-	- && P12234.1 RecName: Full=Phosphate carrier protein, mitochondrial; AltName: Full=Phosphate transport protein; Short=PTP; AltName: Full=Solute carrier family 25 member 3; Flags: Precursor && PF00153:Mitochondrial carrier protein	Mito_carr
Scaffold-105.15	203.091	195.789	195.476	296.199	209.174	226.889	241.534	210.317	171.252	protein_coding_gene	Scaffold-105	247685	254611	-	1032	-	- && Q9CQ79.1 RecName: Full=Thioredoxin domain-containing protein 9; AltName: Full=ATP-binding protein associated with cell differentiation && PF00085:Thioredoxin	-
Scaffold-273.7	214.478	250.33	223.124	201.746	203.979	201.264	236.717	211.285	204.628	protein_coding_gene	Scaffold-273	62169	73061	+	776	-	- && Q9LEF0.1 RecName: Full=Probable phospholipid hydroperoxide glutathione peroxidase; Short=PHGPx && PF00255:Glutathione peroxidase	GSHPx
Scaffold-13.44	228.426	189.234	207.384	464.353	151.412	171.498	208.307	168.176	149.448	protein_coding_gene	Scaffold-13	612394	627088	-	802	-	- && - && -	-
Scaffold-131.48	199.538	201.065	194.526	385.393	211.746	222.162	192.756	163.271	166.881	protein_coding_gene	Scaffold-131	947623	966105	-	2432	-	- && Q58DM8.1 RecName: Full=Enoyl-CoA hydratase, mitochondrial; AltName: Full=Enoyl-CoA hydratase 1; AltName: Full=Short-chain enoyl-CoA hydratase; Short=SCEH; Flags: Precursor && PF01612:3'-5' exonuclease|PF00378:Enoyl-CoA hydratase/isomerase	ECH
Scaffold-31.60	180.784	237.637	219.868	187.421	236.248	227.462	223.6	192.566	229.317	protein_coding_gene	Scaffold-31	984649	987490	-	459	-	- && Q8MSF5.1 RecName: Full=Ribonuclease kappa; Short=RNase K; Short=RNase kappa && -	-
Scaffold-233.26	220.892	176.955	154.79	340.477	198.793	249.981	221.619	180.135	187.137	protein_coding_gene	Scaffold-233	551155	558584	+	1078	-	- && P0C8L6.1 RecName: Full=Probable pterin-4-alpha-carbinolamine dehydratase; Short=PHS; AltName: Full=4-alpha-hydroxy-tetrahydropterin dehydratase; AltName: Full=Pterin carbinolamine dehydratase; Short=PCD && PF01329:Pterin 4 alpha carbinolamine dehydratase	-
Scaffold-31.71	203.033	184.515	187.997	389.948	177.477	212.921	217.823	188.238	167.52	protein_coding_gene	Scaffold-31	1312150	1312926	+	777	-	- && - && -	-
Scaffold-245.13	33.069	132.993	353.707	112.92	240.061	382.138	246.472	311.278	116.782	protein_coding_gene	Scaffold-245	195275	206378	-	1287	-	- && - && -	-
Scaffold-327.14	170.43	210.086	214.313	280.766	247.525	203.303	183.826	225.293	193.502	protein_coding_gene	Scaffold-327	194132	226029	-	1875	-	- && Q95SX7.1 RecName: Full=Probable RNA-directed DNA polymerase from transposon BS; AltName: Full=Reverse transcriptase && PF00078:Reverse transcriptase (RNA-dependent DNA polymerase)|PF10151:Uncharacterised conserved protein (DUF2359)	RVT_1
Scaffold-46.80	176.607	189.449	230.257	245.97	205.676	241.049	242.238	207.829	188.927	protein_coding_gene	Scaffold-46	1771738	1806051	+	1732	-	- && Q2HJ97.1 RecName: Full=Prohibitin-2 && PF01145:SPFH domain / Band 7 family	-
Scaffold-96.161	112.502	105.626	34.8707	16.9751	1028.77	316.954	88.0502	61.6101	160.933	protein_coding_gene	Scaffold-96	3301713	3302066	+	354	-	- && - && -	-
Scaffold-2930.1	99.4193	69.0111	74.7438	101.459	94.1782	133.416	60.7602	122.958	1163.08	protein_coding_gene	Scaffold-2930	4575	5026	+	452	-	- && Q8TGM7.1 RecName: Full=Putative uncharacterized protein ART2; AltName: Full=Antisense to ribosomal RNA transcript protein 2 && -	-
Scaffold-32.155	216.747	175.611	190.963	326.392	195.25	240.349	204.747	198.63	167.982	protein_coding_gene	Scaffold-32	1975025	1988344	-	1844	-	- && Q90512.1 RecName: Full=Dihydrolipoyllysine-residue succinyltransferase component of 2-oxoglutarate dehydrogenase complex, mitochondrial; AltName: Full=2-oxoglutarate dehydrogenase complex component E2; Short=OGDC-E2; AltName: Full=Dihydrolipoamide succinyltransferase component of 2-oxoglutarate dehydrogenase complex; AltName: Full=E2K; Flags: Precursor && PF00364:Biotin-requiring enzyme|PF00…	Biotin_lipoyl
Scaffold-59.43	191.458	159.702	186.96	375.204	189.012	246.846	201.093	169.64	193.357	protein_coding_gene	Scaffold-59	1091967	1097094	+	534	-	- && - && PF08293:Mitochondrial ribosomal subunit S27	-
Scaffold-248.5	199.739	155.677	151.101	415.49	157.501	245.793	216.782	172.655	187.333	protein_coding_gene	Scaffold-248	44593	46488	-	569	-	- && - && -	-
Scaffold-73.6	206.705	188.646	179.062	347.299	191.974	229.75	199.572	181.932	168.789	protein_coding_gene	Scaffold-73	85921	92731	-	999	-	- && Q5R4V9.1 RecName: Full=Dimethyladenosine transferase 1, mitochondrial; AltName: Full=Mitochondrial 12S rRNA dimethylase 1; AltName: Full=Mitochondrial transcription factor B1; Short=mtTFB1; AltName: Full=S-adenosylmethionine-6-N', N'-adenosyl(rRNA) dimethyltransferase 1; Flags: Precursor && PF00398:Ribosomal RNA adenine dimethylase	-
Scaffold-64.20	208.612	200.703	197.213	262.903	192.384	217.828	224.343	190.361	191.569	protein_coding_gene	Scaffold-64	655875	688701	+	1203	-	- && Q5RAT5.1 RecName: Full=Protein LSM12 homolog >Q9D0R8.1 RecName: Full=Protein LSM12 homolog >Q3MHD2.2 RecName: Full=Protein LSM12 homolog >Q0VCF9.2 RecName: Full=Protein LSM12 homolog && PF09793:Anticodon-binding domain|PF10044:Retinal tissue protein	-
Scaffold-103.5	228.198	166.606	145.966	312.466	202.858	199.329	223.849	235.855	170.641	protein_coding_gene	Scaffold-103	25486	48265	-	1454	-	- && - && -	-
Scaffold-158.16	293.538	229.372	245.224	91.8498	181.772	152.888	228.343	285.022	170.514	protein_coding_gene	Scaffold-158	143688	153570	-	1961	-	- && Q6DDT1.2 RecName: Full=Inositol-3-phosphate synthase 1-B; Short=IPS 1-B; AltName: Full=Myo-inositol 1-phosphate synthase B; Short=MI-1-P synthase B; Short=MIP synthase B && PF07994:Myo-inositol-1-phosphate synthase|PF01658:Myo-inositol-1-phosphate synthase	-
Scaffold-45.43	299.762	169.162	259.987	263.613	190.27	172.627	166.065	183.998	167.666	protein_coding_gene	Scaffold-45	892981	907528	+	2000	-	- && Q14624.4 RecName: Full=Inter-alpha-trypsin inhibitor heavy chain H4; Short=ITI heavy chain H4; Short=ITI-HC4; Short=Inter-alpha-inhibitor heavy chain 4; AltName: Full=Inter-alpha-trypsin inhibitor family heavy chain-related protein; Short=IHRP; AltName: Full=Plasma kallikrein sensitive glycoprotein 120; Short=Gp120; Short=PK-120; Contains: RecName: Full=70 kDa inter-alpha-trypsin inhibitor h…	-
Scaffold-9761.1	237.765	207.592	215.814	117.504	185.926	191.199	247.143	260.734	204.772	protein_coding_gene	Scaffold-9761	306	754	-	288	-	- && P11147.3 RecName: Full=Heat shock 70 kDa protein cognate 4; AltName: Full=Heat shock 70 kDa protein 88E && PF00012:Hsp70 protein|PF10712:NAD-specific glutamate dehydrogenase	HSP70
Scaffold-37.95	172.168	157.004	176.617	408.263	192.595	222.362	190.598	160.591	183.521	protein_coding_gene	Scaffold-37	2206112	2207347	-	1236	-	- && Q9VCZ8.1 RecName: Full=Probable prefoldin subunit 5 && PF02996:Prefoldin subunit	-
Scaffold-381.9	198.978	176.257	202.784	306.689	179.99	218.836	206.218	201.364	170.228	protein_coding_gene	Scaffold-381	120088	150312	-	2970	-	- && B3N4C7.1 RecName: Full=Eukaryotic translation initiation factor 3 subunit I; Short=eIF3i; AltName: Full=Eukaryotic translation initiation factor 3 subunit 2; AltName: Full=TRIP-1 homolog && PF00078:Reverse transcriptase (RNA-dependent DNA polymerase)	RVT_1
Scaffold-153.5	174.078	173.89	243.894	347.9	188.571	187.525	194.585	184.824	164.613	protein_coding_gene	Scaffold-153	141126	148592	+	840	-	- && - && PF00050:Kazal-type serine protease inhibitor domain	-
Scaffold-10.89	104.3	183.945	124.793	143.05	226.621	344.101	274.728	209.649	218.329	protein_coding_gene	Scaffold-10	1714674	1718996	-	1174	-	- && - && -	-
Scaffold-31.159	194.61	224.763	179.063	227.117	212.258	201.085	227.68	184.648	175.292	protein_coding_gene	Scaffold-31	3060362	3065164	+	2281	-	- && - && PF07084:Thyroid hormone-inducible hepatic protein Spot 14	-
Scaffold-63.32	188.357	154.371	164.321	306.201	183.731	212.29	236.011	196.444	184.423	protein_coding_gene	Scaffold-63	627051	638207	+	1884	-	- && Q9D6Z1.2 RecName: Full=Nucleolar protein 56; AltName: Full=Nucleolar protein 5A && PF01798:snoRNA binding domain, fibrillarin|PF08156:NOP5NT (NUC127) domain	-
Scaffold-9.118	201.877	172.184	186.125	283.884	177.481	216.009	217.029	195.733	170.735	protein_coding_gene	Scaffold-9	1865138	1886985	+	1494	-	- && Q8SWU7.1 RecName: Full=Obg-like ATPase 1 && PF01926:50S ribosome-binding GTPase|PF06071:Protein of unknown function (DUF933)	-
Scaffold-590.10	183.805	122.584	90.2958	79.8589	380.876	356.679	222.264	194.982	182.85	protein_coding_gene	Scaffold-590	155651	191539	+	1800	-	- && - && -	-
Scaffold-239.29	374.591	241.02	13.9872	20.1974	343.546	367.6	47.0322	40.6788	355.534	protein_coding_gene	Scaffold-239	523060	534964	+	689	-	- && P11733.2 RecName: Full=Cuticle protein 7; AltName: Full=LM-ACP 7; Short=LM-7 && PF00379:Insect cuticle protein	Chitin_bind_4
Scaffold-621.8	173.986	185.786	169.481	310.836	181.763	214.182	209.475	200.851	154.223	protein_coding_gene	Scaffold-621	58141	91460	-	4043	-	- && Q27580.2 RecName: Full=Adenosylhomocysteinase; Short=AdoHcyase; AltName: Full=S-adenosyl-L-homocysteine hydrolase && PF05221:S-adenosyl-L-homocysteine hydrolase|PF00176:SNF2 family N-terminal domain|PF00670:S-adenosyl-L-homocysteine hydrolase, NAD binding domain|PF00271:Helicase conserved C-terminal domain	SNF2_N
Scaffold-274.9	198.674	171.335	166.822	277.58	191.002	213.726	214.231	192.333	173.966	protein_coding_gene	Scaffold-274	95994	103001	-	1034	-	- && Q5RCG9.1 RecName: Full=Prefoldin subunit 3; AltName: Full=Von Hippel-Lindau-binding protein 1; Short=VBP-1; Short=VHL-binding protein 1 && PF02996:Prefoldin subunit	-
Scaffold-370.10	129.791	79.7574	144.377	451.607	65.2416	257.34	384.924	83.1184	202.828	protein_coding_gene	Scaffold-370	134874	139929	-	534	-	- && - && -	-
Scaffold-103.67	53.9737	140.652	348.599	135.199	212.684	296.376	228.049	285.732	97.6783	protein_coding_gene	Scaffold-103	958678	966085	+	848	-	- && - && -	-
Scaffold-72.228	272.906	187.739	239.818	143.644	178.652	189.908	195.183	216.24	173.707	protein_coding_gene	Scaffold-72	3641156	3651996	-	1113	-	- && Q9VBV3.1 RecName: Full=Protein takeout; Flags: Precursor && PF06585:Haemolymph juvenile hormone binding protein (JHBP)	-
Scaffold-97.93	219.051	191.54	223.66	177.202	178.023	181.686	218.897	204.807	192.114	protein_coding_gene	Scaffold-97	1811780	1874741	-	2198	-	- && Q7K556.1 RecName: Full=TRPL translocation defect protein 14 && PF13521:AAA domain|PF02099:Josephin	-
Scaffold-119.37	200.62	183.226	179.126	179.455	238.081	219.982	179.057	227.804	178.142	protein_coding_gene	Scaffold-119	755898	763465	-	1261	-	- && Q9H3K2.2 RecName: Full=Growth hormone-inducible transmembrane protein; AltName: Full=Dermal papilla-derived protein 2; AltName: Full=Mitochondrial morphology and cristae structure 1; Short=MICS1; AltName: Full=Transmembrane BAX inhibitor motif-containing protein 5; Flags: Precursor && PF01027:Inhibitor of apoptosis-promoting Bax1	-
Scaffold-97.171	212.46	167.876	164.25	265.199	185.445	197.887	220.802	185.066	176.576	protein_coding_gene	Scaffold-97	3459661	3475847	-	1898	-	- && Q95L54.1 RecName: Full=Annexin A8; AltName: Full=Annexin VIII; AltName: Full=Annexin-8 && PF00191:Annexin|PF14766:Replication protein A interacting N-terminal	-
Scaffold-225.7	180.026	192.206	174.967	241.734	210.738	223.433	174.688	180.597	183.459	protein_coding_gene	Scaffold-225	160158	178856	-	2374	-	- && P54385.2 RecName: Full=Glutamate dehydrogenase, mitochondrial; Short=GDH; Flags: Precursor && PF02812:Glu/Leu/Phe/Val dehydrogenase, dimerisation domain	-
Scaffold-264.7	166.832	157.298	163.507	337.709	187.949	207.51	201.252	174.097	161.273	protein_coding_gene	Scaffold-264	71598	89869	-	900	-	- && Q9VFR0.2 RecName: Full=Protein BCCIP homolog && PF13862:p21-C-terminal region-binding protein	-
Scaffold-20.103	69.7735	211.813	338.577	174.306	201.595	232.192	161.298	226.723	134.653	protein_coding_gene	Scaffold-20	2961500	2962141	-	489	-	- && - && -	-
Scaffold-4.198	210.451	208.804	215.546	303.467	154.216	214.515	139.771	136.911	164.258	protein_coding_gene	Scaffold-4	3573924	3575406	+	531	-	- && - && -	-
Scaffold-36.51	157.287	168.746	124.201	367.359	200.258	216.014	162.12	163.712	186.179	protein_coding_gene	Scaffold-36	966297	966847	+	551	-	- && P62321.1 RecName: Full=Small nuclear ribonucleoprotein F; Short=snRNP-F; AltName: Full=Sm protein F; Short=Sm-F; Short=SmF >P62306.1 RecName: Full=Small nuclear ribonucleoprotein F; Short=snRNP-F; AltName: Full=Sm protein F; Short=Sm-F; Short=SmF >P62307.1 RecName: Full=Small nuclear ribonucleoprotein F; Short=snRNP-F; AltName: Full=Sm protein F; Short=Sm-F; Short=SmF >Q3T0Z8.2 RecName: Full…	LSM
Scaffold-54.111	194.331	194.926	221.462	122.058	203.212	203.538	210.92	206.141	187.073	protein_coding_gene	Scaffold-54	1965180	1986525	+	1968	-	- && P26268.1 RecName: Full=Pyruvate dehydrogenase E1 component subunit alpha type II, mitochondrial; Short=PDHA2; Short=PDHE1-A; Flags: Precursor && PF00676:Dehydrogenase E1 component	-
Scaffold-411.9	191.072	201.57	222.162	176.729	178.889	203.909	199.145	201.821	167.985	protein_coding_gene	Scaffold-411	313181	338483	-	1548	-	- && P21533.5 RecName: Full=60S ribosomal protein L6; AltName: Full=Neoplasm-related protein C140 && PF00505:HMG (high mobility group) box|PF01159:Ribosomal protein L6e|PF03868:Ribosomal protein L6, N-terminal domain	HMG_box
Scaffold-170.56	173.674	125.263	135.121	393.152	146.754	188.534	221.277	175.194	180.392	protein_coding_gene	Scaffold-170	804817	887231	+	9102	-	- && Q9V7S5.1 RecName: Full=Putative inorganic phosphate cotransporter && PF00176:SNF2 family N-terminal domain|PF01779:Ribosomal L29e protein family|PF07690:Major Facilitator Superfamily|PF00271:Helicase conserved C-terminal domain	MFS_1
Scaffold-361.7	217.712	230.671	215.478	89.2296	224.045	180.293	162.009	179.79	235.503	protein_coding_gene	Scaffold-361	60144	73087	-	498	-	- && - && -	-
Scaffold-37.94	192.265	189.723	197.518	194.889	181.111	202.026	197.354	192.947	175.544	protein_coding_gene	Scaffold-37	2159398	2179738	-	1876	-	- && Q94522.3 RecName: Full=Succinate--CoA ligase [ADP/GDP-forming] subunit alpha, mitochondrial; AltName: Full=Succinyl-CoA synthetase subunit alpha; Short=SCS-alpha; Flags: Precursor && PF02629:CoA binding domain|PF00549:CoA-ligase|PF00078:Reverse transcriptase (RNA-dependent DNA polymerase)	CoA_binding
Scaffold-9.96	158.903	166.497	185.374	285.775	166.951	204.694	192.51	193.924	164.361	protein_coding_gene	Scaffold-9	1513504	1525253	-	2017	-	- && B4KID9.1 RecName: Full=Pescadillo homolog && PF06732:Pescadillo N-terminus|PF16589:BRCT domain, a BRCA1 C-terminus domain	-
Scaffold-62.39	174.608	174.614	164.68	319.018	209.653	211.926	192.699	135.515	133.201	protein_coding_gene	Scaffold-62	723445	723732	+	288	-	- && - && PF09801:Integral membrane protein S linking to the trans Golgi network	-
Scaffold-169.22	171.291	173.341	157.086	383.537	144.84	195.265	174.667	156.69	155.372	protein_coding_gene	Scaffold-169	495814	500192	-	710	-	- && Q7JWG9.1 RecName: Full=39S ribosomal protein L52, mitochondrial; Short=L52mt; Short=MRP-L52; Flags: Precursor && -	-
Scaffold-79.13	162.301	163.191	156.298	319.299	205.965	193.381	166.025	177.07	155.447	protein_coding_gene	Scaffold-79	159413	160614	+	1202	-	- && P55735.3 RecName: Full=Protein SEC13 homolog; AltName: Full=SEC13-like protein 1; AltName: Full=SEC13-related protein && -	-
Scaffold-2188.1	121.879	266.327	47.6201	124.472	101.04	599.916	22.6261	157.822	253.672	protein_coding_gene	Scaffold-2188	890	2818	+	357	-	- && - && -	-
Scaffold-298.23	109.411	132.861	97.001	214.671	324.968	317.818	167.831	147.053	178.379	protein_coding_gene	Scaffold-298	320016	335528	-	979	-	- && - && -	-
Scaffold-20.121	141.334	133.609	147.975	284.438	227.204	184.616	209.19	195.769	160.068	protein_coding_gene	Scaffold-20	3456544	3475736	+	1525	-	- && Q74FW6.1 RecName: Full=L-threonine ammonia-lyase; AltName: Full=L-serine ammonia-lyase; AltName: Full=Threonine/serine ammonia-lyase && PF00291:Pyridoxal-phosphate dependent enzyme	PALP
Scaffold-103.97	51.5547	29.4824	38.1756	71.9139	42.1726	63.3404	45.0423	40.4068	1296.84	protein_coding_gene	Scaffold-103	1598502	1607242	-	2133	-	- && - && -	-
Scaffold-14.120	177.391	174.185	150.005	241.402	195.806	207.328	182.349	184.992	165.302	protein_coding_gene	Scaffold-14	2472429	2485869	+	2995	-	- && P31689.2 RecName: Full=DnaJ homolog subfamily A member 1; AltName: Full=DnaJ protein homolog 2; AltName: Full=HSDJ; AltName: Full=Heat shock 40 kDa protein 4; AltName: Full=Heat shock protein J2; Short=HSJ-2; AltName: Full=Human DnaJ protein 2; Short=hDj-2; Flags: Precursor && PF00226:DnaJ domain|PF00684:DnaJ central domain|PF01556:DnaJ C terminal domain	DnaJ_C
Scaffold-59.132	173.332	175.751	179.251	213.665	206.942	206.852	203.428	145.938	165.255	protein_coding_gene	Scaffold-59	2317480	2318396	+	917	-	- && - && -	-
Scaffold-197.6	160.238	173.8	247.357	341.755	189.217	149.424	159.704	140.086	106.282	protein_coding_gene	Scaffold-197	20823	27029	-	1055	-	- && A7YWG4.1 RecName: Full=Gamma-glutamyl hydrolase; AltName: Full=Conjugase; AltName: Full=GH; AltName: Full=Gamma-Glu-X carboxypeptidase; Flags: Precursor && PF07722:Peptidase C26	-
Scaffold-85.10	145.253	168.667	189.3	442.744	171.526	140.231	154.965	132.246	121.058	protein_coding_gene	Scaffold-85	229207	239997	+	834	-	- && - && PF05497:Destabilase	-
Scaffold-46.66	192.468	165.072	165.823	258.328	178.909	187.096	181.458	168.274	165.779	protein_coding_gene	Scaffold-46	1503384	1519899	+	1370	-	- && P84169.1 RecName: Full=26S proteasome non-ATPase regulatory subunit 13; AltName: Full=26S proteasome regulatory subunit RPN9; AltName: Full=26S proteasome regulatory subunit S11; AltName: Full=26S proteasome regulatory subunit p40.5 && PF01399:PCI domain	-
Scaffold-37.24	218.677	148.781	199.218	224.708	228.391	151.714	187.67	164.755	136.732	protein_coding_gene	Scaffold-37	498080	535393	+	2784	-	- && - && -	-
Scaffold-20.246	195.202	190.879	175.832	179.956	170.759	207.201	207.244	167.418	165.145	protein_coding_gene	Scaffold-20	6226556	6257779	+	1377	-	- && Q6P8Y1.4 RecName: Full=Calcyphosin-like protein && PF13499:EF-hand domain pair	-
Scaffold-464.11	188.843	164.481	172.709	215.479	188.126	194.521	180.643	177.325	173.677	protein_coding_gene	Scaffold-464	199963	210279	+	2311	-	- && P23696.1 RecName: Full=Serine/threonine-protein phosphatase PP2A; AltName: Full=Protein microtubule star && PF00149:Calcineurin-like phosphoesterase	Metallophos
Scaffold-1.155	148.221	202.554	174.411	182.658	181.003	216.426	163.058	185.685	200.321	protein_coding_gene	Scaffold-1	2882002	2899962	-	3347	-	- && - && PF13855:Leucine rich repeat	-
Scaffold-21.145	191.559	162.434	170.134	218.231	182.973	205.408	182.134	170.092	162.85	protein_coding_gene	Scaffold-21	3161500	3171416	-	1271	-	- && Q9CX56.2 RecName: Full=26S proteasome non-ATPase regulatory subunit 8; AltName: Full=26S proteasome regulatory subunit RPN12; AltName: Full=26S proteasome regulatory subunit S14 && PF10075:CSN8/PSMD8/EIF3K family	-
Scaffold-107.22	177.268	173.925	196.062	200.244	204.822	167.961	158.008	201.504	165.446	protein_coding_gene	Scaffold-107	566392	566560	+	169	-	- && - && -	-
Scaffold-72.485	194.897	154.247	165.597	234.608	187.329	181.994	176.169	171.851	171.991	protein_coding_gene	Scaffold-72	9464246	9473490	+	1553	-	- && Q9D8W5.4 RecName: Full=26S proteasome non-ATPase regulatory subunit 12; AltName: Full=26S proteasome regulatory subunit RPN5; AltName: Full=26S proteasome regulatory subunit p55 && PF01399:PCI domain	-
Scaffold-504.8	163.628	165.483	135.411	157.652	193.287	251.749	199.265	166.629	199.267	protein_coding_gene	Scaffold-504	128541	180891	-	4243	-	- && Q93113.1 RecName: Full=Glutathione S-transferase 1, isoform D; AltName: Full=AgGst1-alpha; AltName: Full=Aggst1-1; AltName: Full=Aggst1-6; AltName: Full=Aggst2-1; AltName: Full=DDT-dehydrochlorinase; AltName: Full=GST class-theta && PF07732:Multicopper oxidase|PF07731:Multicopper oxidase|PF00394:Multicopper oxidase|PF00043:Glutathione S-transferase, C-terminal domain|PF02798:Glutathione S-tr…	GST_N
Scaffold-337.2	121.676	102.702	94.6544	458.321	125.898	245.22	204.562	131.405	143.672	protein_coding_gene	Scaffold-337	29865	130843	-	8001	-	- && Q62130.2 RecName: Full=Tyrosine-protein phosphatase non-receptor type 14; AltName: Full=Protein-tyrosine phosphatase PTP36 && PF03099:Biotin/lipoate A/B protein ligase family|PF00102:Protein-tyrosine phosphatase|PF09379:FERM N-terminal domain|PF00373:FERM central domain|PF09380:FERM C-terminal PH-like domain|PF00083:Sugar (and other) transporter	Y_phosphatase
Scaffold-10.120	470.691	36.8377	114.814	206.06	48.44	169.193	64.9877	451.663	60.7519	protein_coding_gene	Scaffold-10	2352765	2370451	+	1376	-	- && P37364.1 RecName: Full=Defensin && PF01097:Arthropod defensin	-
Scaffold-205.4	184.438	158.32	187.157	163.215	149.23	192.561	228.8	173.297	178.658	protein_coding_gene	Scaffold-205	66824	117133	+	9216	-	- && P11029.1 RecName: Full=Acetyl-CoA carboxylase; Short=ACC; Includes: RecName: Full=Biotin carboxylase && PF02785:Biotin carboxylase C-terminal domain|PF00289:Carbamoyl-phosphate synthase L chain, N-terminal domain|PF01039:Carboxyl transferase domain|PF00364:Biotin-requiring enzyme|PF08326:Acetyl-CoA carboxylase, central region|PF02786:Carbamoyl-phosphate synthase L chain, ATP binding domain	Carboxyl_trans
Scaffold-23.85	174.798	185.541	172.306	195.043	196.727	218.801	145.581	146.91	175.731	protein_coding_gene	Scaffold-23	1558232	1603391	-	3912	-	- && P29523.4 RecName: Full=Membrane-bound alkaline phosphatase; Short=M-ALP; Flags: Precursor && PF00245:Alkaline phosphatase	-
Scaffold-9.227	159.296	161.342	157.976	269.235	170.096	180.841	191.765	162.772	156.343	protein_coding_gene	Scaffold-9	4027268	4036345	-	1059	-	- && Q3SZC1.1 RecName: Full=GrpE protein homolog 1, mitochondrial; AltName: Full=Mt-GrpE#1; Short=mt-GrpE; Flags: Precursor && PF01025:GrpE	-
Scaffold-43.77	171.986	140.319	142.77	278.713	158.132	201.235	188.392	167.692	159.948	protein_coding_gene	Scaffold-43	1525680	1526420	-	741	-	- && Q3ZBL5.1 RecName: Full=Peptidyl-tRNA hydrolase 2, mitochondrial; Short=PTH 2; AltName: Full=Bcl-2 inhibitor of transcription; Flags: Precursor && PF01981:Peptidyl-tRNA hydrolase PTH2	PTH2
Scaffold-15.262	172.041	164.314	162.047	209.208	189.669	185.713	174.791	189.853	160.061	protein_coding_gene	Scaffold-15	6060919	6096239	+	3728	-	- && P27118.1 RecName: Full=Ornithine decarboxylase; Short=ODC && PF00278:Pyridoxal-dependent decarboxylase, C-terminal sheet domain|PF02784:Pyridoxal-dependent decarboxylase, pyridoxal binding domain	-
Scaffold-430.8	145.042	187.326	147.995	213.04	183.874	196.292	185.18	174.398	164.879	protein_coding_gene	Scaffold-430	169988	185780	-	1227	-	- && Q5REY3.1 RecName: Full=Thioredoxin-dependent peroxide reductase, mitochondrial; AltName: Full=Peroxiredoxin-3; Flags: Precursor && PF00578:AhpC/TSA family|PF10417:C-terminal domain of 1-Cys peroxiredoxin	-
Scaffold-84.78	164.879	159.708	143.401	323.021	150.426	171.042	184.788	160.291	126.649	protein_coding_gene	Scaffold-84	1501873	1504910	-	703	-	- && E0VVF6.1 RecName: Full=Inosine triphosphate pyrophosphatase; Short=ITPase; Short=Inosine triphosphatase; AltName: Full=Non-canonical purine NTP pyrophosphatase; AltName: Full=Non-standard purine NTP pyrophosphatase; AltName: Full=Nucleoside-triphosphate diphosphatase; AltName: Full=Nucleoside-triphosphate pyrophosphatase; Short=NTPase && PF01725:Ham1 family	-
Scaffold-183.28	180.966	140.395	150.774	288.62	166.407	187.758	167.302	178.671	122.24	protein_coding_gene	Scaffold-183	746059	795370	-	1687	-	- && P81795.2 RecName: Full=Eukaryotic translation initiation factor 2 subunit 3, X-linked; AltName: Full=Eukaryotic translation initiation factor 2 subunit gamma, X-linked; Short=eIF-2-gamma; Short=eIF-2-gamma X; AltName: Full=PP42 && PF03144:Elongation factor Tu domain 2|PF00009:Elongation factor Tu GTP binding domain|PF09173:Initiation factor eIF2 gamma, C terminal	GTP_EFTU
Scaffold-149.55	192.579	161.184	143.213	251.067	183.431	175.477	167.402	160.123	145.35	protein_coding_gene	Scaffold-149	791548	809735	+	1426	-	- && P62333.1 RecName: Full=26S protease regulatory subunit 10B; AltName: Full=26S proteasome AAA-ATPase subunit RPT4; AltName: Full=Proteasome 26S subunit ATPase 6; AltName: Full=Proteasome subunit p42 >P62334.1 RecName: Full=26S protease regulatory subunit 10B; AltName: Full=26S proteasome AAA-ATPase subunit RPT4; AltName: Full=Proteasome 26S subunit ATPase 6; AltName: Full=Proteasome subunit p…	AAA
Scaffold-52.32	201.401	164.294	191.176	215.225	158.974	159.333	192.332	175.494	120.941	protein_coding_gene	Scaffold-52	432542	457735	+	3011	-	- && Q29451.4 RecName: Full=Lysosomal alpha-mannosidase; Short=Laman; AltName: Full=Lysosomal acid alpha-mannosidase; AltName: Full=Mannosidase alpha class 2B member 1; AltName: Full=Mannosidase alpha-B; Contains: RecName: Full=Lysosomal alpha-mannosidase A peptide; Contains: RecName: Full=Lysosomal alpha-mannosidase B peptide; Contains: RecName: Full=Lysosomal alpha-mannosidase C peptide; Contai…	-
Scaffold-77.61	177.194	159.032	162.767	221.682	178.643	185.72	163.143	164.221	162.837	protein_coding_gene	Scaffold-77	962429	978056	-	1737	-	- && P46472.1 RecName: Full=26S protease regulatory subunit 7; AltName: Full=26S proteasome AAA-ATPase subunit RPT1; AltName: Full=Proteasome 26S subunit ATPase 2; AltName: Full=Protein MSS1; Short=xMSS1 [Xenopus laevis] && PF00004:ATPase family associated with various cellular activities (AAA)	AAA
Scaffold-132.86	144.989	145.339	119.288	306.515	182.774	170.468	202.132	146.525	148.943	protein_coding_gene	Scaffold-132	1684268	1686868	+	551	-	- && Q24320.1 RecName: Full=DNA-directed RNA polymerases I, II, and III subunit RPABC2; Short=RNA polymerases I, II, and III subunit ABC2; AltName: Full=RPB6 homolog && PF01192:RNA polymerase Rpb6	-
Scaffold-17.346	153.323	163.494	164.971	265.393	149.592	178.794	193.299	147.301	149.354	protein_coding_gene	Scaffold-17	7510339	7529115	+	1467	-	- && - && -	-
Scaffold-144.27	153.37	148.878	138.731	365.436	133.429	148.483	209.63	154.473	112.057	protein_coding_gene	Scaffold-144	462670	466910	+	1010	-	- && Q05AL1.1 RecName: Full=Armadillo repeat-containing protein 8 && -	-
Scaffold-166.41	181.494	129.749	170.124	435.051	111.027	124.262	186.047	136.472	85.2487	protein_coding_gene	Scaffold-166	829192	839933	-	450	-	- && P22464.2 RecName: Full=Annexin B9; AltName: Full=Annexin IX; AltName: Full=Annexin-9 && PF00191:Annexin|PF05375:Pacifastin inhibitor (LCMII)	-
Scaffold-809.2	225.688	185.673	222.409	216.873	87.1286	92.433	199.11	189.493	136.931	protein_coding_gene	Scaffold-809	15066	16874	-	315	-	- && Q9DFR6.3 RecName: Full=40S ribosomal protein S13 && PF08069:Ribosomal S13/S15 N-terminal domain	-
Scaffold-33.90	189.019	162.688	182.878	217.083	160.525	164.181	174.868	164.71	138.661	protein_coding_gene	Scaffold-33	1452813	1478112	-	1395	-	- && Q00637.3 RecName: Full=Superoxide dismutase [Mn], mitochondrial; Flags: Precursor && PF02777:Iron/manganese superoxide dismutases, C-terminal domain|PF00081:Iron/manganese superoxide dismutases, alpha-hairpin domain	-
Scaffold-98.35	181.093	143.48	135.567	198.719	175.622	178.067	173.71	196.39	171.633	protein_coding_gene	Scaffold-98	731990	748486	+	2790	-	- && P22465.3 RecName: Full=Annexin B10; AltName: Full=Annexin X; AltName: Full=Annexin-10 && PF00078:Reverse transcriptase (RNA-dependent DNA polymerase)|PF00191:Annexin	RVT_1
Scaffold-347.5	154.388	171.428	222.341	105.846	227.928	161.135	150.527	193.356	162.609	protein_coding_gene	Scaffold-347	65154	66667	-	375	-	- && Q5XI41.3 RecName: Full=Translocating chain-associated membrane protein 1 && -	-
Scaffold-314.12	200.367	168.963	183.186	212.604	171.892	130.778	177.022	162.157	140.622	protein_coding_gene	Scaffold-314	185421	217844	-	1742	-	- && Q9PWF7.3 RecName: Full=Catalase && PF00199:Catalase|PF06628:Catalase-related immune-responsive	Catalase
Scaffold-552.6	171.15	181.209	193.462	104.629	199.419	185.627	154.219	162.866	194.557	protein_coding_gene	Scaffold-552	58707	60095	+	464	-	- && - && PF03179:Vacuolar (H+)-ATPase G subunit	-
Scaffold-55.93	157.873	152.453	143.405	238.27	173.896	193.912	158.99	154.539	172.511	protein_coding_gene	Scaffold-55	1716283	1726925	-	1930	-	- && P23198.2 RecName: Full=Chromobox protein homolog 3; AltName: Full=Heterochromatin protein 1 homolog gamma; Short=HP1 gamma; AltName: Full=M32; AltName: Full=Modifier 2 protein && PF01393:Chromo shadow domain|PF00385:Chromo (CHRromatin Organisation MOdifier) domain	Chromo
Scaffold-251.205	166.352	152.231	135.599	236.158	172.132	183.376	176.815	155.252	165.718	protein_coding_gene	Scaffold-251	2540773	2544441	-	1435	-	- && Q6DFM9.1 RecName: Full=Mitochondrial import receptor subunit TOM20 homolog; AltName: Full=Mitochondrial 20 kDa outer membrane protein; AltName: Full=Outer mitochondrial membrane receptor Tom20 && PF02064:MAS20 protein import receptor	-
Scaffold-108.89	172.509	184.077	172.69	115.738	215.522	188.624	146.39	157.986	188.262	protein_coding_gene	Scaffold-108	1421376	1449819	-	1656	-	- && Q68HB4.1 RecName: Full=Profilin && PF00235:Profilin	-
Scaffold-50.130	185.109	256.792	130.409	169.329	118.416	108.475	246.687	207.368	114.927	protein_coding_gene	Scaffold-50	1821133	1822008	+	876	-	- && P82147.1 RecName: Full=Protein lethal(2)essential for life; AltName: Full=Protein Efl21 && PF00011:Hsp20/alpha crystallin family	-
Scaffold-217.38	160.499	136.52	135.876	279.028	178.63	181.72	175.628	150.073	135.343	protein_coding_gene	Scaffold-217	776699	781551	+	777	-	- && Q6DDA4.1 RecName: Full=U4/U6.U5 small nuclear ribonucleoprotein 27 kDa protein; Short=U4/U6.U5 snRNP 27 kDa protein; Short=U4/U6.U5-27K; AltName: Full=U4/U6.U5 tri-snRNP-associated protein 3 && PF08648:Protein of unknown function (DUF1777)	-
Scaffold-14.21	158.381	148.571	132.314	288.258	160.001	174.319	171.868	153.698	145.402	protein_coding_gene	Scaffold-14	492840	494380	-	1541	-	- && Q8NC51.2 RecName: Full=Plasminogen activator inhibitor 1 RNA-binding protein; AltName: Full=PAI1 RNA-binding protein 1; Short=PAI-RBP1; AltName: Full=SERPINE1 mRNA-binding protein 1 && PF16174:Intracellular hyaluronan-binding protein 4 N-terminal|PF04774:Hyaluronan / mRNA binding family	-
Scaffold-12.220	106.404	157.212	157.463	254.778	158.123	187.265	187.653	174.995	148.15	protein_coding_gene	Scaffold-12	4687691	4699163	-	3001	-	- && - && -	-
Scaffold-374.16	145.498	156.042	159.076	283.229	131.847	171.699	186.818	163.781	131.645	protein_coding_gene	Scaffold-374	255604	260928	-	469	-	- && - && PF01395:PBP/GOBP family	-
Scaffold-2137.1	143.669	152.29	144.952	284.982	172.125	162.92	154.976	149.394	158.919	protein_coding_gene	Scaffold-2137	1214	6028	+	753	-	- && Q9VRL3.1 RecName: Full=Probable prefoldin subunit 4 && PF01920:Prefoldin subunit	-
Scaffold-234.24	132.935	159.834	145.529	204.026	190.081	184.611	164.112	173.846	165.194	protein_coding_gene	Scaffold-234	594071	610037	+	1692	-	- && Q27268.1 RecName: Full=ATP-dependent RNA helicase WM6; Short=DEAD box protein UAP56; Short=Dmrnahel; AltName: Full=HEL/UAP56 && PF00270:DEAD/DEAH box helicase|PF00271:Helicase conserved C-terminal domain	DEAD
Scaffold-72.171	174.992	180.048	182.308	117.669	173.982	182.829	144.998	184.191	176.147	protein_coding_gene	Scaffold-72	2748800	2758994	+	1356	-	- && Q9Z2I9.2 RecName: Full=Succinate--CoA ligase [ADP-forming] subunit beta, mitochondrial; AltName: Full=ATP-specific succinyl-CoA synthetase subunit beta; AltName: Full=Succinyl-CoA synthetase beta-A chain; Short=SCS-betaA; Flags: Precursor && PF00549:CoA-ligase|PF08442:ATP-grasp domain	-
Scaffold-72.259	162.817	150.442	149.404	240.32	186.298	179.18	144.481	140.692	161.488	protein_coding_gene	Scaffold-72	4305248	4311320	+	1472	-	- && P67810.1 RecName: Full=Signal peptidase complex catalytic subunit SEC11A; AltName: Full=Endopeptidase SP18; AltName: Full=Microsomal signal peptidase 18 kDa subunit; Short=SPase 18 kDa subunit; AltName: Full=SEC11 homolog A; AltName: Full=SEC11-like protein 1; AltName: Full=SPC18 >P67811.1 RecName: Full=Signal peptidase complex catalytic subunit SEC11A; AltName: Full=Endopeptidase SP18; AltN…	Peptidase_S24
Scaffold-13.160	244.249	104.219	73.0635	413.391	102.97	123.795	202.922	108.992	135.912	protein_coding_gene	Scaffold-13	2692791	2698117	-	495	-	- && Q6PBH5.1 RecName: Full=Cytochrome c oxidase subunit NDUFA4 && PF06522:NADH-ubiquinone reductase complex 1 MLRQ subunit	-
Scaffold-96.159	200.354	34.025	8.32944	20.6425	593.014	430.225	25.0312	23.4127	171.503	protein_coding_gene	Scaffold-96	3293201	3294802	-	429	-	- && - && -	-
Scaffold-397.5	157.534	134.739	130.272	332.979	147.295	154.938	160.04	140.985	145.344	protein_coding_gene	Scaffold-397	63178	67332	+	975	-	- && Q58DU5.3 RecName: Full=Proteasome subunit alpha type-3 && PF00227:Proteasome subunit|PF10584:Proteasome subunit A N-terminal signature	Proteasome
Scaffold-415.5	193.575	127.767	125.914	290.784	156.61	156.891	168.178	152.769	129.173	protein_coding_gene	Scaffold-415	51641	57479	+	608	-	- && E0W481.1 RecName: Full=1,2-dihydroxy-3-keto-5-methylthiopentene dioxygenase; AltName: Full=Acireductone dioxygenase (Fe(2+)-requiring); Short=ARD; Short=Fe-ARD && PF03079:ARD/ARD' family	-
Scaffold-9.321	156.798	190.454	178.99	98.3657	182.188	156.383	176.171	173.892	188.382	protein_coding_gene	Scaffold-9	5790733	5802885	+	1389	-	- && Q9VPH7.2 RecName: Full=Eukaryotic peptide chain release factor subunit 1; Short=Eukaryotic release factor 1; Short=eRF1 && PF03464:eRF1 domain 2|PF03463:eRF1 domain 1|PF03465:eRF1 domain 3	-
Scaffold-12.173	161.465	195.21	180.349	126.33	173.287	145.916	169.121	156.944	189.777	protein_coding_gene	Scaffold-12	3997279	4011232	-	885	-	- && P49096.1 RecName: Full=Cytochrome b5; Short=CYTB5 && PF01817:Chorismate mutase type II|PF00173:Cytochrome b5-like Heme/Steroid binding domain	-
Scaffold-21.121	144.118	202.269	168.089	37.5455	169.612	181.391	168.453	210.563	209.288	protein_coding_gene	Scaffold-21	2487240	2524371	+	994	-	- && P82147.1 RecName: Full=Protein lethal(2)essential for life; AltName: Full=Protein Efl21 && PF00011:Hsp20/alpha crystallin family	-
Scaffold-17.256	175.907	153.856	156.911	220.828	155.088	157.388	171.149	151.319	148.406	protein_coding_gene	Scaffold-17	5487250	5511337	-	2583	-	- && Q4R503.1 RecName: Full=Sorting nexin-1 && PF09325:Vps5 C terminal like|PF00787:PX domain|PF04800:ETC complex I subunit conserved region	PX
Scaffold-169.15	181.349	126.519	171.361	204.577	137.447	162.379	195.027	177.763	127.456	protein_coding_gene	Scaffold-169	439688	446043	-	1454	-	- && Q9SLM6.1 RecName: Full=Glutathione S-transferase F3; Short=AtGSTF3; AltName: Full=GST class-phi member 3; AltName: Full=Glutathione S-transferase 16 && PF13417:Glutathione S-transferase, N-terminal domain	-
Scaffold-10.21	134.695	128.903	144.552	296.775	160.856	162.513	186.83	133.271	132.858	protein_coding_gene	Scaffold-10	456160	474415	+	1030	-	- && Q9CQK7.1 RecName: Full=RWD domain-containing protein 1; AltName: Full=DRG family-regulatory protein 2; AltName: Full=IH1 && PF05773:RWD domain|PF16543:DRG Family Regulatory Proteins, Tma46	RWD
Scaffold-61.24	141.07	130.488	151.022	261.434	155.391	178.668	146.679	161.762	147.774	protein_coding_gene	Scaffold-61	522185	526986	+	793	-	- && Q9VLJ9.2 RecName: Full=39S ribosomal protein L51, mitochondrial; Short=L51mt; Short=MRP-L51; Flags: Precursor && PF10244:Mitochondrial ribosomal subunit	-
Scaffold-352.9	179.263	132.777	164.047	219.237	196.451	140.15	137.029	165.251	137.967	protein_coding_gene	Scaffold-352	96875	101220	-	1835	-	- && Q3SZ87.1 RecName: Full=Translocon-associated protein subunit gamma; Short=TRAP-gamma; AltName: Full=Signal sequence receptor subunit gamma; Short=SSR-gamma && PF07074:Translocon-associated protein, gamma subunit (TRAP-gamma)	-
Scaffold-71.75	302.717	112.856	143.591	179.097	78.6318	93.0941	311.345	199.828	47.7435	protein_coding_gene	Scaffold-71	1375309	1394987	+	1607	-	- && Q64442.3 RecName: Full=Sorbitol dehydrogenase; AltName: Full=L-iditol 2-dehydrogenase && PF00107:Zinc-binding dehydrogenase|PF08240:Alcohol dehydrogenase GroES-like domain	ADH_N
Scaffold-238.26	142.09	0	0	1003.42	132.85	0	1.13581	0	189.208	protein_coding_gene	Scaffold-238	492966	494473	-	753	-	- && - && -	-
Scaffold-69.47	142.172	161.044	162.565	255.139	147.611	171.328	151.942	149.169	127.379	protein_coding_gene	Scaffold-69	952788	997515	-	2685	-	- && B4GMC3.1 RecName: Full=Transmembrane emp24 domain-containing protein eca; Flags: Precursor && PF01105:emp24/gp25L/p24 family/GOLD|PF00078:Reverse transcriptase (RNA-dependent DNA polymerase)|PF00248:Aldo/keto reductase family	Aldo_ket_red
Scaffold-122.54	177.961	143.739	130.79	167.076	172.471	187.853	172.463	154.4	161.264	protein_coding_gene	Scaffold-122	1192671	1217165	-	2954	-	- && Q95RI5.1 RecName: Full=Failed axon connections && PF14497:Glutathione S-transferase, C-terminal domain	-
Scaffold-44.122	155.765	154.764	167.147	228.197	140.254	166.21	173.088	148.803	132.061	protein_coding_gene	Scaffold-44	2082455	2093586	+	4345	-	- && O09167.3 RecName: Full=60S ribosomal protein L21 && PF01157:Ribosomal protein L21e	-
Scaffold-251.82	168.715	130.569	151.371	215.747	131.625	170.725	163.143	185.31	147.835	protein_coding_gene	Scaffold-251	1174067	1186042	-	2023	-	- && P34943.1 RecName: Full=NADH dehydrogenase [ubiquinone] 1 alpha subcomplex subunit 9, mitochondrial; AltName: Full=Complex I-39kD; Short=CI-39kD; AltName: Full=NADH-ubiquinone oxidoreductase 39 kDa subunit; Flags: Precursor && PF01370:NAD dependent epimerase/dehydratase family	Epimerase
Scaffold-400.11	179.055	157.967	158.101	198.63	158.4	132.367	194.773	151.915	128.154	protein_coding_gene	Scaffold-400	248029	288873	-	2843	-	- && Q42524.1 RecName: Full=4-coumarate--CoA ligase 1; Short=4CL 1; AltName: Full=4-coumarate--CoA ligase isoform 1; Short=At4CL1; AltName: Full=4-coumaroyl-CoA synthase 1 && PF00501:AMP-binding enzyme|PF13193:AMP-binding enzyme C-terminal domain	AMP-binding
Scaffold-122.127	186.883	184.193	191.051	328.513	108.707	104.422	158.852	108.67	87.7695	protein_coding_gene	Scaffold-122	2685497	2701854	+	1757	-	- && - && PF09765:WD-repeat region|PF11793:FANCL C-terminal domain|PF15430:Single domain von Willebrand factor type C	-
Scaffold-179.17	196.864	187.24	157.858	144.8	150.263	116.607	146.043	130.745	227.519	protein_coding_gene	Scaffold-179	316425	336385	-	747	-	- && - && -	-
Scaffold-251.194	137.929	173.338	155.685	169.156	189.951	171.021	136.857	142.148	180.852	protein_coding_gene	Scaffold-251	2376907	2378585	+	1679	-	- && P35128.1 RecName: Full=Ubiquitin-conjugating enzyme E2 N; AltName: Full=E2 ubiquitin-conjugating enzyme N; AltName: Full=Protein bendless; AltName: Full=Ubiquitin carrier protein N; AltName: Full=Ubiquitin-conjugating enzyme E2-17 kDa; AltName: Full=Ubiquitin-protein ligase D3; AltName: Full=Ubiquitin-protein ligase N && PF00179:Ubiquitin-conjugating enzyme	UQ_con
Scaffold-200.3	150.889	121.665	132.66	213.606	181.591	185.425	167.009	154.867	145.148	protein_coding_gene	Scaffold-200	35507	41721	+	1950	-	- && Q8I1F4.1 RecName: Full=rRNA 2'-O-methyltransferase fibrillarin; AltName: Full=Histone-glutamine methyltransferase && PF01269:Fibrillarin	-
Scaffold-67.248	167.567	130.317	150.377	230.017	135.542	155.948	154.886	190.736	134.921	protein_coding_gene	Scaffold-67	3351504	3367688	-	2310	-	- && - && PF00061:Lipocalin / cytosolic fatty-acid binding protein family	-
Scaffold-1.19	149.415	127.567	128.105	351.27	133.754	155.278	156.825	132.379	114.331	protein_coding_gene	Scaffold-1	465769	471872	+	732	-	- && Q16G71.1 RecName: Full=Mediator of RNA polymerase II transcription subunit 10; AltName: Full=Mediator complex subunit 10 && PF09748:Transcription factor subunit Med10 of Mediator complex	-
Scaffold-113.28	150.527	137.939	123.171	270.513	153.303	174.9	148.204	152.089	129.83	protein_coding_gene	Scaffold-113	738742	760897	+	1251	-	- && Q94535.2 RecName: Full=Splicing factor U2af 38 kDa subunit; AltName: Full=U2 auxiliary factor 38 kDa subunit; AltName: Full=U2 snRNP auxiliary factor small subunit && PF11969:Scavenger mRNA decapping enzyme C-term binding|PF13893:RNA recognition motif. (a.k.a. RRM, RBD, or RNP domain)	-
Scaffold-405.7	95.3424	177.373	24.0269	61.5237	126.624	257.592	305.136	144.105	244.883	protein_coding_gene	Scaffold-405	65581	71161	+	1005	-	- && - && -	-
Scaffold-239.26	332.283	120.22	1.20314	5.66168	334.684	323.967	32.3805	16.4153	261.66	protein_coding_gene	Scaffold-239	441791	452124	+	810	-	- && P83995.1 RecName: Full=Cuticle protein 18.6, isoform B; AltName: Full=LM-ACP 18.6B; Short=LM-18.6B && PF00379:Insect cuticle protein	Chitin_bind_4
Scaffold-81.29	154.682	159.686	156.887	122.895	174.964	176.048	154.843	180.808	146.334	protein_coding_gene	Scaffold-81	686279	698257	+	1584	-	- && Q9NB32.1 RecName: Full=T-complex protein 1 subunit delta; Short=TCP-1-delta; AltName: Full=CCT-delta && PF00118:TCP-1/cpn60 chaperonin family	-
Scaffold-17.278	149.498	127.08	118.72	338.422	132.774	161.456	134.387	130.377	134.375	protein_coding_gene	Scaffold-17	5943385	5946705	-	664	-	- && Q6P161.1 RecName: Full=39S ribosomal protein L54, mitochondrial; Short=L54mt; Short=MRP-L54; Flags: Precursor && PF08561:Mitochondrial ribosomal protein L37	-
Scaffold-87.7	135.902	150.928	166.82	105.931	162.289	205.907	148.129	192.235	158.129	protein_coding_gene	Scaffold-87	180540	200719	-	936	-	- && - && -	-
Scaffold-65.89	140.548	167.986	174.496	59.222	205.125	159.805	156.882	174.84	184.612	protein_coding_gene	Scaffold-65	1755286	1787302	-	1498	-	- && P20478.3 RecName: Full=Glutamine synthetase 2 cytoplasmic; AltName: Full=Glutamate--ammonia ligase 2 && PF03951:Glutamine synthetase, beta-Grasp domain|PF00120:Glutamine synthetase, catalytic domain	-
Scaffold-48.10	155.657	144.943	141.238	180.003	168.712	185.648	140.682	148.702	156.779	protein_coding_gene	Scaffold-48	96209	103590	+	1403	-	- && O00487.1 RecName: Full=26S proteasome non-ATPase regulatory subunit 14; AltName: Full=26S proteasome regulatory subunit RPN11; AltName: Full=26S proteasome-associated PAD1 homolog 1 >O35593.2 RecName: Full=26S proteasome non-ATPase regulatory subunit 14; AltName: Full=26S proteasome regulatory subunit RPN11; AltName: Full=MAD1 && PF13012:Maintenance of mitochondrial structure and function|PF…	Mov34
Scaffold-17.178	109.667	151.439	105.765	171.376	186.357	205.499	169.58	166.697	155.051	protein_coding_gene	Scaffold-17	3761723	3768891	+	645	-	- && Q8BUR9.1 RecName: Full=Mitotic-spindle organizing protein 1; AltName: Full=Mitotic-spindle organizing protein associated with a ring of gamma-tubulin 1 && PF12554:Mitotic-spindle organizing gamma-tubulin ring associated	-
Scaffold-369.3	128.273	188.267	82.1101	324.517	141.754	149.54	151.627	122.557	129.347	protein_coding_gene	Scaffold-369	46345	50000	-	633	-	- && - && -	-
Scaffold-357.19	123.612	138.696	174.248	210.709	123.611	176.114	184.766	156.469	124.453	protein_coding_gene	Scaffold-357	346638	354786	+	1131	-	- && Q8NBX0.1 RecName: Full=Saccharopine dehydrogenase-like oxidoreductase && PF03435:Saccharopine dehydrogenase NADP binding domain	Saccharop_dh
Scaffold-202.5	107.133	153.022	128.137	223.118	144.216	182.184	170.905	149.022	146.306	protein_coding_gene	Scaffold-202	44821	50971	-	769	-	- && - && -	-
Scaffold-158.18	130.232	135.6	145.691	231.757	143.667	172.427	169.763	128.705	137.788	protein_coding_gene	Scaffold-158	179034	180049	-	1016	-	- && - && PF11788:39S mitochondrial ribosomal protein L46	-
Scaffold-9.85	128.355	126.267	118.493	270.281	148.768	172.627	167.343	136.309	126.476	protein_coding_gene	Scaffold-9	1441725	1442477	+	753	-	- && P49028.1 RecName: Full=Protein mago nashi && PF02792:Mago nashi protein	-
Scaffold-226.5	122.801	136.159	104.999	351.299	139.64	129.375	161.557	131.222	116.627	protein_coding_gene	Scaffold-226	52021	59729	-	1517	-	- && Q2F5R8.1 RecName: Full=Eukaryotic translation initiation factor 3 subunit E; Short=eIF3e; AltName: Full=Eukaryotic translation initiation factor 3 subunit 6 && PF01399:PCI domain|PF09440:eIF3 subunit 6 N terminal domain	-
Scaffold-283.18	148.744	160.538	179.309	141.513	166.258	167.575	125.71	158.02	143.94	protein_coding_gene	Scaffold-283	316130	354338	+	4005	-	- && Q64430.3 RecName: Full=Copper-transporting ATPase 1; AltName: Full=Copper pump 1; AltName: Full=Menkes disease-associated protein homolog && PF08246:Cathepsin propeptide inhibitor domain (I29)|PF00112:Papain family cysteine protease|PF00122:E1-E2 ATPase|PF00702:haloacid dehalogenase-like hydrolase	Peptidase_C1
Scaffold-395.13	161.17	90.9796	94.0513	320.791	104.341	192.485	172.954	132.144	120.648	protein_coding_gene	Scaffold-395	347897	355051	-	700	-	- && - && PF00083:Sugar (and other) transporter	Sugar_tr
Scaffold-35.107	155.382	158.975	152.497	180.115	157.72	159.469	139.989	134.642	147.132	protein_coding_gene	Scaffold-35	2004634	2087466	-	2547	-	- && Q9R049.2 RecName: Full=E3 ubiquitin-protein ligase AMFR; AltName: Full=Autocrine motility factor receptor; Short=AMF receptor; AltName: Full=RING-type E3 ubiquitin transferase AMFR && PF01111:Cyclin-dependent kinase regulatory subunit|PF13639:Ring finger domain|PF02845:CUE domain|PF00179:Ubiquitin-conjugating enzyme|PF02109:DAD family	UQ_con
Scaffold-76.14	123.416	129.208	119.753	328.334	140.819	150.906	134.894	132.408	125.754	protein_coding_gene	Scaffold-76	388012	391286	-	708	-	- && Q9CQV1.1 RecName: Full=Mitochondrial import inner membrane translocase subunit TIM16; AltName: Full=Mitochondria-associated granulocyte macrophage CSF-signaling molecule; AltName: Full=Presequence translocated-associated motor subunit PAM16 && PF03656:Pam16	-
Scaffold-160.22	90.8017	139.562	128.723	164.107	157.786	206.267	165.681	136.773	184.296	protein_coding_gene	Scaffold-160	405525	414529	+	1033	-	- && P48611.1 RecName: Full=6-pyruvoyl tetrahydrobiopterin synthase; Short=PTP synthase; Short=PTPS; AltName: Full=Protein purple; AltName: Full=Sepiapterin synthase A && PF01242:6-pyruvoyl tetrahydropterin synthase	-
Scaffold-181.7	136.414	134.182	140.91	197.049	157.25	155.531	146.523	153.589	146.082	protein_coding_gene	Scaffold-181	84393	121345	+	2353	-	- && Q04451.2 RecName: Full=Glycine--tRNA ligase; AltName: Full=Diadenosine tetraphosphate synthetase; Short=AP-4-A synthetase; AltName: Full=Glycyl-tRNA synthetase; Short=GlyRS && PF03129:Anticodon binding domain|PF00458:WHEP-TRS domain|PF00587:tRNA synthetase class II core domain (G, H, P, S and T)	HGTP_anticodon
Scaffold-87.54	151.284	142.874	148.829	168.006	156.591	153.901	149.333	130.731	157.635	protein_coding_gene	Scaffold-87	1187456	1192731	+	2051	-	- && P51572.3 RecName: Full=B-cell receptor-associated protein 31; Short=BCR-associated protein 31; Short=Bap31; AltName: Full=6C6-AG tumor-associated antigen; AltName: Full=Protein CDM; AltName: Full=p28 && PF05529:B-cell receptor-associated protein 31-like	-
Scaffold-31.129	171.972	131.454	131.029	163.878	155.135	163.53	154.522	160.207	122.205	protein_coding_gene	Scaffold-31	2463841	2499866	+	1928	-	- && Q5ZIQ3.1 RecName: Full=Heterogeneous nuclear ribonucleoprotein K; Short=hnRNP K && PF00013:KH domain	KH_1
Scaffold-73.4	130.845	169.616	180.301	140.359	92.0311	181.207	178.853	160.633	116.959	protein_coding_gene	Scaffold-73	49928	69892	-	1272	-	- && Q9VJK8.2 RecName: Full=Juvenile hormone acid O-methyltransferase; AltName: Full=Juvenile hormone acid methyltransferase; Short=DmJHAMT && PF13847:Methyltransferase domain	-
Scaffold-53.91	131.803	122.718	117.261	304.136	121.185	155.746	146.351	130.866	116.972	protein_coding_gene	Scaffold-53	1758211	1768234	+	1785	-	- && Q19724.1 RecName: Full=Probable NADH dehydrogenase [ubiquinone] iron-sulfur protein 6, mitochondrial; AltName: Full=Complex I-13kD-A; Short=CI-13kD-A; AltName: Full=NADH-ubiquinone oxidoreductase 13 kDa-A subunit; Flags: Precursor && PF00665:Integrase core domain|PF10276:Zinc-finger domain	rve
Scaffold-58.44	111.667	134.127	145.651	227.328	128.308	166.447	152.504	141.225	137.518	protein_coding_gene	Scaffold-58	994280	1008710	+	1417	-	- && - && PF00650:CRAL/TRIO domain	-
Scaffold-2.239	174.397	117.24	169.109	167.862	123.301	194.589	170.924	135.359	89.4716	protein_coding_gene	Scaffold-2	4317367	4334304	+	2195	-	- && Q9D6Y9.1 RecName: Full=1,4-alpha-glucan-branching enzyme; AltName: Full=Brancher enzyme; AltName: Full=Glycogen-branching enzyme && PF02922:Carbohydrate-binding module 48 (Isoamylase N-terminal domain)|PF02806:Alpha amylase, C-terminal all-beta domain|PF00128:Alpha amylase, catalytic domain	-
Scaffold-65.96	146.817	148.323	191.745	61.0492	216.147	116.405	101.015	166.16	193.337	protein_coding_gene	Scaffold-65	1912719	1976059	+	9035	-	- && Q9U943.2 RecName: Full=Apolipophorins; Contains: RecName: Full=Apolipophorin-2; AltName: Full=Apolipophorin II; AltName: Full=apoLp-2; Contains: RecName: Full=Apolipophorin-1; AltName: Full=Apolipophorin I; AltName: Full=apoLp-1; Flags: Precursor && PF00094:von Willebrand factor type D domain|PF09172:Domain of unknown function (DUF1943)|PF01347:Lipoprotein amino terminal region|PF06448:Domai…	Vitellogenin_N
Scaffold-40.3	237.48	86.0991	124.492	477.265	32.3442	55.0019	221.157	51.8042	52.4478	protein_coding_gene	Scaffold-40	39785	53985	+	4596	-	- && Q03278.2 RecName: Full=Retrovirus-related Pol polyprotein from type-1 retrotransposable element R2; AltName: Full=Retrovirus-related Pol polyprotein from type I retrotransposable element R2; Includes: RecName: Full=Reverse transcriptase; Includes: RecName: Full=Endonuclease && PF00078:Reverse transcriptase (RNA-dependent DNA polymerase)	RVT_1
Scaffold-9.262	145.87	118.785	135.775	209.022	148.703	164.301	133.875	139.089	140.037	protein_coding_gene	Scaffold-9	4553216	4560953	+	1414	-	- && P17980.3 RecName: Full=26S protease regulatory subunit 6A; AltName: Full=26S proteasome AAA-ATPase subunit RPT5; AltName: Full=Proteasome 26S subunit ATPase 3; AltName: Full=Proteasome subunit P50; AltName: Full=Tat-binding protein 1; Short=TBP-1 && PF00004:ATPase family associated with various cellular activities (AAA)	AAA
Scaffold-152.7	154.937	103.256	144.229	201.721	126.714	194.847	115.087	179.456	106.378	protein_coding_gene	Scaffold-152	152184	158638	+	976	-	- && - && -	-
Scaffold-15.246	129.846	122.678	161.211	173.415	165.352	161.204	141.814	127.67	140.396	protein_coding_gene	Scaffold-15	5710251	5741264	+	2277	-	- && P41571.1 RecName: Full=Glucose-6-phosphate 1-dehydrogenase; Short=G6PD; AltName: Full=Zwischenferment && PF00479:Glucose-6-phosphate dehydrogenase, NAD binding domain|PF02781:Glucose-6-phosphate dehydrogenase, C-terminal domain	G6PD_C
Scaffold-92.16	130.643	129.027	133.202	235.765	131.404	137.155	149.703	142.338	132.911	protein_coding_gene	Scaffold-92	277072	294446	+	2416	-	- && Q9NFP1.1 RecName: Full=Vanin-like protein 1; Flags: Precursor && PF00795:Carbon-nitrogen hydrolase	CN_hydrolase
Scaffold-16.123	127.539	136.972	129.279	226.024	160.398	145.861	130.917	125.06	137.607	protein_coding_gene	Scaffold-16	2693366	2698926	+	1181	-	- && P62255.3 RecName: Full=Ubiquitin-conjugating enzyme E2 G1; AltName: Full=E2 ubiquitin-conjugating enzyme G1; AltName: Full=E217K; AltName: Full=UBC7; AltName: Full=Ubiquitin carrier protein G1; AltName: Full=Ubiquitin-protein ligase G1; Contains: RecName: Full=Ubiquitin-conjugating enzyme E2 G1, N-terminally processed >P62253.3 RecName: Full=Ubiquitin-conjugating enzyme E2 G1; AltName: Full=…	UQ_con
Scaffold-118.169	135.955	148.056	177.618	174.7	130.841	101.843	213.285	140.493	95.8048	protein_coding_gene	Scaffold-118	2447958	2472738	-	3036	-	- && Q5EA20.3 RecName: Full=4-hydroxyphenylpyruvate dioxygenase; AltName: Full=4-hydroxyphenylpyruvic acid oxidase; Short=4HPPD; Short=HPD; Short=HPPDase && PF13669:Glyoxalase/Bleomycin resistance protein/Dioxygenase superfamily|PF08395:7tm Chemosensory receptor|PF00692:dUTPase|PF00903:Glyoxalase/Bleomycin resistance protein/Dioxygenase superfamily	Glyoxalase
Scaffold-609.3	137.065	150.708	141.99	174.284	145.937	152.241	145.43	140.066	129.813	protein_coding_gene	Scaffold-609	75512	94276	-	2223	-	- && P24156.2 RecName: Full=Protein l(2)37Cc && PF01145:SPFH domain / Band 7 family	-
Scaffold-369.5	163.714	74.6257	139.261	477.083	99.786	39.1301	137.787	122.775	58.9443	protein_coding_gene	Scaffold-369	65790	70028	+	769	-	- && - && PF05873:ATP synthase D chain, mitochondrial (ATP5H)	-
Scaffold-8.108	166.304	173.811	148.95	143.276	146.036	167.501	112.675	105.67	146.203	protein_coding_gene	Scaffold-8	1571420	1578376	+	3086	-	- && - && -	-
Scaffold-13.91	131.064	116.991	135.626	247.405	149.944	148.799	144.762	117.712	117.866	protein_coding_gene	Scaffold-13	1357001	1365066	+	1093	-	- && Q4FZX7.1 RecName: Full=Signal recognition particle receptor subunit beta; Short=SR-beta && PF09439:Signal recognition particle receptor beta subunit	-
Scaffold-175.32	152.839	116.185	121.207	229.504	139.562	145.482	137.748	118.436	147.448	protein_coding_gene	Scaffold-175	351513	378810	-	1684	-	- && Q7ZWS2.2 RecName: Full=7-methylguanosine phosphate-specific 5'-nucleotidase A; Short=7-methylguanosine nucleotidase A; AltName: Full=Cytosolic 5'-nucleotidase 3B-A; AltName: Full=Cytosolic 5'-nucleotidase III-like protein A; Short=cN-III-like protein A; AltName: Full=N(7)-methylguanylate 5'-phosphatase A && PF10215:Oligosaccaryltransferase|PF05822:Pyrimidine 5'-nucleotidase (UMPH-1)	-
Scaffold-2072.2	130.537	120.234	147.562	211.882	145.336	152.083	121.427	141.298	128.484	protein_coding_gene	Scaffold-2072	4901	5206	+	306	-	- && - && -	-
Scaffold-236.15	73.0421	176.994	162.975	267.626	144.395	119.658	116.854	128.084	108.367	protein_coding_gene	Scaffold-236	342409	352171	+	1180	-	- && P92201.1 RecName: Full=Larval cuticle protein 8; AltName: Full=Larval cuticle protein VIII; Flags: Precursor && PF00379:Insect cuticle protein	Chitin_bind_4
Scaffold-95.30	143.276	132.491	135.783	164.81	138.174	153.285	144.255	146.801	134.737	protein_coding_gene	Scaffold-95	535127	548804	+	2583	-	- && P91928.4 RecName: Full=MICOS complex subunit Mic60 && PF09731:Mitochondrial inner membrane protein	-
Scaffold-120.6	170.652	145.613	122.713	207.917	108.202	120.164	165.23	122.006	130.374	protein_coding_gene	Scaffold-120	110939	123945	-	1906	-	- && B2D0J5.1 RecName: Full=Venom carboxylesterase-6; AltName: Allergen=Api m 8; Flags: Precursor && PF00135:Carboxylesterase family	COesterase
Scaffold-58.31	140.138	118.091	126.53	221.066	135.42	158.258	136.079	144.849	107.356	protein_coding_gene	Scaffold-58	696721	724359	+	1264	-	- && Q4QRK0.2 RecName: Full=Methionine aminopeptidase 1; Short=MAP 1; Short=MetAP 1; AltName: Full=Peptidase M 1 && PF00557:Metallopeptidase family M24|PF15801:zf-MYND-like zinc finger, mRNA-binding	Peptidase_M24
Scaffold-43.14	135.979	153.374	152.076	113.202	164.964	147.585	127.621	141.147	148.511	protein_coding_gene	Scaffold-43	280051	337926	+	3741	-	- && Q92541.4 RecName: Full=RNA polymerase-associated protein RTF1 homolog && PF00241:Cofilin/tropomyosin-type actin-binding protein|PF03126:Plus-3 domain	Cofilin_ADF
Scaffold-20.383	119.675	100.311	118.389	311.529	133.68	142.942	111.818	113.514	129.782	EVM%20prediction%20Scaffold-20.383	Scaffold-20	9185793	9186092	-	300	-	- && - && -	-
Scaffold-70.37	205.977	98.0995	116.592	174.633	146.453	152.063	170.499	141.804	75.3657	protein_coding_gene	Scaffold-70	551543	583063	-	2502	-	- && Q8BG92.1 RecName: Full=Clavesin-2; AltName: Full=Retinaldehyde-binding protein 1-like 2 && PF00650:CRAL/TRIO domain	-
Scaffold-63.57	127.019	114.745	121.238	186.4	140.152	155.657	148.323	149.162	137.574	protein_coding_gene	Scaffold-63	1202611	1224468	-	2031	-	- && P00503.3 RecName: Full=Aspartate aminotransferase, cytoplasmic; Short=cAspAT; AltName: Full=Cysteine aminotransferase, cytoplasmic; AltName: Full=Cysteine transaminase, cytoplasmic; Short=cCAT; AltName: Full=Glutamate oxaloacetate transaminase 1; AltName: Full=Transaminase A && PF00155:Aminotransferase class I and II	Aminotran_1_2
Scaffold-22.8	147.15	148.385	165.227	85.5119	133.611	135.667	145.324	188.518	130.698	protein_coding_gene	Scaffold-22	103338	119386	-	2086	-	- && Q9V411.1 RecName: Full=Nucleolar GTP-binding protein 1; AltName: Full=Novel nucleolar protein 1 && PF06858:Nucleolar GTP-binding protein 1 (NOG1)|PF08155:NOGCT (NUC087) domain	-
Scaffold-572.4	136.671	119.362	121.861	249.119	122.764	142.622	154.01	120.656	112.12	protein_coding_gene	Scaffold-572	77417	86839	-	949	-	- && P43332.1 RecName: Full=U1 small nuclear ribonucleoprotein A; Short=U1 snRNP A; Short=U1-A; Short=U1A; AltName: Full=Sex determination protein snf && PF00076:RNA recognition motif. (a.k.a. RRM, RBD, or RNP domain)|PF13893:RNA recognition motif. (a.k.a. RRM, RBD, or RNP domain)	RRM_1
Scaffold-12.29	167.205	134.567	119.125	165.615	149.92	136.308	158.639	127	120.474	protein_coding_gene	Scaffold-12	888464	919471	-	2347	-	- && Q9BWD1.2 RecName: Full=Acetyl-CoA acetyltransferase, cytosolic; AltName: Full=Acetyl-CoA transferase-like protein; AltName: Full=Cytosolic acetoacetyl-CoA thiolase && PF02803:Thiolase, C-terminal domain|PF00108:Thiolase, N-terminal domain	Thiolase_N
Scaffold-12.174	144.625	129.695	138.124	153.156	163.844	154.681	118.974	151.207	124.544	protein_coding_gene	Scaffold-12	4013436	4020824	-	508	-	- && Q9QUM9.1 RecName: Full=Proteasome subunit alpha type-6; AltName: Full=Macropain iota chain; AltName: Full=Multicatalytic endopeptidase complex iota chain; AltName: Full=Proteasome iota chain && PF10584:Proteasome subunit A N-terminal signature|PF00227:Proteasome subunit	Proteasome
Scaffold-53.39	152.566	122.839	136.203	205.163	118.147	136.002	153.375	134.211	118.729	protein_coding_gene	Scaffold-53	627554	637556	+	2707	-	- && Q9V3U9.1 RecName: Full=Protein slowmo && PF04707:PRELI-like family	MSF1
Scaffold-281.12	146.748	130.302	131.02	180.188	145.21	141.458	131.072	134.637	136.384	protein_coding_gene	Scaffold-281	306358	310028	-	1843	-	- && O61470.2 RecName: Full=Probable 26S proteasome non-ATPase regulatory subunit 3; Short=26S proteasome subunit S3; AltName: Full=26S proteasome regulatory subunit RPN3; AltName: Full=Diphenol oxidase A2 component; Short=DOX-A2 && PF08375:Proteasome regulatory subunit C-terminal|PF01399:PCI domain	-
Scaffold-347.19	121.022	146.761	183.679	118.291	118.323	138.133	149.439	152.902	146.63	protein_coding_gene	Scaffold-347	360771	384101	-	889	-	- && - && -	-
Scaffold-76.31	164.423	115.335	117.108	159.425	158.377	165.057	129.705	143.217	115.59	protein_coding_gene	Scaffold-76	683890	693070	-	1595	-	- && P21522.1 RecName: Full=Heterogeneous nuclear ribonucleoprotein A1, A2/B1 homolog && PF00076:RNA recognition motif. (a.k.a. RRM, RBD, or RNP domain)	RRM_1
Scaffold-74.124	197.444	102.115	130.276	269.785	107.559	91.9318	57.9968	124.476	182.602	protein_coding_gene	Scaffold-74	1531453	1542368	-	2058	-	- && - && -	-
Scaffold-155.24	136.185	127.943	128.886	168.807	130.173	140.8	152.667	129.658	143.46	protein_coding_gene	Scaffold-155	570162	588636	+	2549	-	- && P49915.1 RecName: Full=GMP synthase [glutamine-hydrolyzing]; AltName: Full=GMP synthetase; AltName: Full=Glutamine amidotransferase && PF00117:Glutamine amidotransferase class-I|PF02540:NAD synthase|PF00958:GMP synthase C terminal domain	GATase
Scaffold-36.88	162.58	121.517	129.856	183.658	125.517	133.491	160.12	139.682	99.7016	protein_coding_gene	Scaffold-36	1890378	1899776	+	1295	-	- && B2VG45.1 RecName: Full=3'-5' ssDNA/RNA exonuclease TatD; AltName: Full=DNase TatD && PF01026:TatD related DNase	-
Scaffold-219.22	161.082	109.592	155.44	108.762	146.999	120.331	213.281	148.502	90.7639	protein_coding_gene	Scaffold-219	363626	413436	+	5054	-	- && P50432.2 RecName: Full=Serine hydroxymethyltransferase; Short=SHMT; AltName: Full=Glycine hydroxymethyltransferase; AltName: Full=Glycosylation-related protein 1; AltName: Full=Maternal effect lethal protein 32; AltName: Full=Serine methylase && PF04801:Sin-like protein conserved region|PF00464:Serine hydroxymethyltransferase|PF00916:Sulfate permease family	SHMT
Scaffold-159.27	112.278	138.734	78.0705	75.9445	183.938	179.28	215.518	127.189	142.906	protein_coding_gene	Scaffold-159	455725	466829	+	810	-	- && - && PF02014:Reeler domain	-
Scaffold-76.57	106.712	128.81	117.61	263.956	132.441	138.86	131.808	121.095	109.486	protein_coding_gene	Scaffold-76	1278956	1283875	+	801	-	- && Q8N983.1 RecName: Full=39S ribosomal protein L43, mitochondrial; Short=L43mt; Short=MRP-L43; AltName: Full=Mitochondrial ribosomal protein bMRP36a; Flags: Precursor && PF05047:Mitochondrial ribosomal protein L51 / S25 / CI-B8 domain	-
Scaffold-13.61	114.27	126.897	123.497	230.929	143.107	127.556	118.27	145.708	118.429	protein_coding_gene	Scaffold-13	835429	837129	-	1701	-	- && Q1JPX3.2 RecName: Full=Phenylalanine--tRNA ligase alpha subunit; AltName: Full=Phenylalanyl-tRNA synthetase alpha subunit; Short=PheRS && PF01409:tRNA synthetases class II core domain (F)	tRNA-synt_2d
Scaffold-831.2	66.5419	104.656	52.7412	129.411	197.626	229.099	191.757	112.504	164.002	protein_coding_gene	Scaffold-831	31025	43840	+	1624	-	- && - && PF00379:Insect cuticle protein	Chitin_bind_4
Scaffold-25.108	120.891	143.907	140.528	110.216	117.833	155.974	159.048	143.598	151.928	protein_coding_gene	Scaffold-25	2410191	2456539	+	1716	-	- && P21265.2 RecName: Full=Adenylosuccinate lyase; Short=ADSL; Short=ASL; AltName: Full=Adenylosuccinase; Short=ASase && PF00206:Lyase|PF10397:Adenylosuccinate lyase C-terminus	-
Scaffold-128.29	133.239	124.901	110.653	228.605	147.86	133.613	120.062	116.735	125.687	protein_coding_gene	Scaffold-128	879422	904167	+	1416	-	- && Q9TT99.1 RecName: Full=Copper transport protein ATOX1; AltName: Full=Metal transport protein ATX1 && PF00403:Heavy-metal-associated domain	HMA
Scaffold-694.11	139.94	125.978	124.325	185.638	130.963	141.836	137.342	120.458	132.462	protein_coding_gene	Scaffold-694	302805	312809	-	1242	-	- && P42207.1 RecName: Full=Septin-1; AltName: Full=DIFF6 protein homolog; AltName: Full=Protein innocent bystander && PF00735:Septin	GTP_CDC
Scaffold-176.19	130.709	135.018	129.209	168.579	139.276	149.026	128.445	123.688	131.138	protein_coding_gene	Scaffold-176	414336	440036	-	3498	-	- && Q9W1J3.1 RecName: Full=Gastrulation defective protein 1 homolog && PF03153:Transcription factor IIA, alpha/beta subunit	-
Scaffold-267.3	172.522	86.0868	77.8491	237.158	125.56	132.045	155.569	145.417	101.934	protein_coding_gene	Scaffold-267	47377	102740	-	5031	-	- && P12261.3 RecName: Full=Elongation factor 1-gamma; Short=EF-1-gamma; AltName: Full=eEF-1B gamma && PF00043:Glutathione S-transferase, C-terminal domain|PF12974:ABC transporter, phosphonate, periplasmic substrate-binding protein|PF02798:Glutathione S-transferase, N-terminal domain	GST_N
Scaffold-133.12	131.478	159.964	172.479	81.3273	129.226	113.269	160.193	144.739	140.074	protein_coding_gene	Scaffold-133	248263	259614	+	840	-	- && Q9VND8.1 RecName: Full=GTP-binding protein Rheb homolog; Flags: Precursor && PF00071:Ras family	Ras
Scaffold-513.8	135.108	111.028	112.798	93.0648	167.821	182.544	136.462	157.533	135.391	protein_coding_gene	Scaffold-513	150075	198508	-	3429	-	- && Q9Z110.2 RecName: Full=Delta-1-pyrroline-5-carboxylate synthase; Short=P5CS; AltName: Full=Aldehyde dehydrogenase family 18 member A1; Includes: RecName: Full=Glutamate 5-kinase; Short=GK; AltName: Full=Gamma-glutamyl kinase; Includes: RecName: Full=Gamma-glutamyl phosphate reductase; Short=GPR; AltName: Full=Glutamate-5-semialdehyde dehydrogenase; AltName: Full=Glutamyl-gamma-semialdehyde d…	AA_kinase
Scaffold-9.95	116.961	128.188	139.711	129.34	145.232	141.058	139.916	142.565	146.255	protein_coding_gene	Scaffold-9	1506325	1512416	+	1609	-	- && Q21735.1 RecName: Full=Probable nuclear transport factor 2; Short=NTF-2 && PF02136:Nuclear transport factor 2 (NTF2) domain	-
Scaffold-1444.14	135.783	118.063	115.336	204.283	143.48	148.207	127.487	119.572	115.798	protein_coding_gene	Scaffold-1444	276486	315999	+	2272	-	- && P55035.2 RecName: Full=26S proteasome non-ATPase regulatory subunit 4; AltName: Full=26S proteasome regulatory subunit RPN10; AltName: Full=26S proteasome regulatory subunit S5A; AltName: Full=54 kDa subunit of mu particle; AltName: Full=Multiubiquitin chain-binding protein; AltName: Full=p54 && PF13519:von Willebrand factor type A domain	-
Scaffold-17.352	127.825	112.426	120.923	226.847	118.27	143.789	135.211	133.127	109.042	protein_coding_gene	Scaffold-17	7656484	7659694	+	771	-	- && O88696.1 RecName: Full=ATP-dependent Clp protease proteolytic subunit, mitochondrial; AltName: Full=Endopeptidase Clp; Flags: Precursor && PF00574:Clp protease	-
Scaffold-53.22	243.743	111.757	126.174	313.774	85.1435	38.8583	187.738	48.9284	68.0059	protein_coding_gene	Scaffold-53	313172	333372	+	696	-	- && - && -	-
Scaffold-96.158	159.557	144.167	5.8832	15.0938	458.453	268.16	10.0472	10.535	148.536	protein_coding_gene	Scaffold-96	3281669	3282597	-	681	-	- && - && -	-
Scaffold-12.81	146.407	109.578	107.24	162.894	138.606	169.002	117.535	114.306	150.227	protein_coding_gene	Scaffold-12	1969958	1974112	-	4155	-	- && Q9XYN1.1 RecName: Full=Innexin inx2; Short=Innexin-2; AltName: Full=G-Inx2 && PF00876:Innexin	-
Scaffold-180.22	128.965	127.605	105.913	236.88	112.635	148.491	126.62	117.642	108.482	protein_coding_gene	Scaffold-180	669774	673353	-	731	-	- && Q15543.1 RecName: Full=Transcription initiation factor TFIID subunit 13; AltName: Full=Transcription initiation factor TFIID 18 kDa subunit; Short=TAF(II)18; Short=TAFII-18; Short=TAFII18 >P61216.1 RecName: Full=Transcription initiation factor TFIID subunit 13; AltName: Full=Transcription initiation factor TFIID 18 kDa subunit; Short=TAF(II)18; Short=TAFII-18; Short=TAFII18 >Q5R9W6.1 RecName…	-
Scaffold-192.5	128.679	130.557	122.183	155.296	136.048	148.212	141.415	122.844	126.128	protein_coding_gene	Scaffold-192	128329	150504	-	1893	-	- && P63208.2 RecName: Full=S-phase kinase-associated protein 1; AltName: Full=Cyclin-A/CDK2-associated protein p19; Short=p19A; AltName: Full=Organ of Corti protein 2; Short=OCP-2; AltName: Full=Organ of Corti protein II; Short=OCP-II; AltName: Full=RNA polymerase II elongation factor-like protein; AltName: Full=SIII; AltName: Full=Transcription elongation factor B polypeptide 1-like; AltName: F…	Skp1
Scaffold-55.88	122.366	117.073	133.342	168.169	153.143	149.614	114.581	128.632	122.153	protein_coding_gene	Scaffold-55	1553490	1602139	+	3310	-	- && O08715.4 RecName: Full=A-kinase anchor protein 1, mitochondrial; AltName: Full=Dual specificity A-kinase-anchoring protein 1; Short=D-AKAP-1; AltName: Full=Protein kinase A-anchoring protein 1; Short=PRKA1; AltName: Full=Spermatid A-kinase anchor protein; Short=S-AKAP; Flags: Precursor && PF00567:Tudor domain|PF00013:KH domain	KH_1
Scaffold-113.38	124.87	114.646	122.431	161.484	135.981	151.971	133.458	134.549	129.35	protein_coding_gene	Scaffold-113	959243	968272	+	1370	-	- && Q9U4L6.2 RecName: Full=Mitochondrial import receptor subunit TOM40 homolog 1; Short=dtom40; AltName: Full=Male sterile protein 15; AltName: Full=Translocase of outer membrane 40 kDa subunit homolog 1 && PF01459:Eukaryotic porin	-
Scaffold-203.28	98.2703	143.996	64.8918	96.2471	151.19	228.402	132.153	131.581	158.52	protein_coding_gene	Scaffold-203	422688	433654	-	1390	-	- && - && PF01607:Chitin binding Peritrophin-A domain	CBM_14
Scaffold-186.13	121.421	124.481	117.349	219.729	121.25	148.215	126.663	111.579	113.122	protein_coding_gene	Scaffold-186	218007	238991	+	2950	-	- && Q9VZE6.2 RecName: Full=Ribosome biogenesis protein BRX1 homolog; AltName: Full=Brix domain-containing protein 2 homolog && PF04427:Brix domain|PF00227:Proteasome subunit	Proteasome
Scaffold-58.48	130.229	119.225	117.913	184.635	126.481	134.709	144.915	125.953	119.595	protein_coding_gene	Scaffold-58	1049435	1064470	-	1844	-	- && P60051.2 RecName: Full=Ubiquitin carboxyl-terminal hydrolase 14; AltName: Full=Deubiquitinating enzyme 14; AltName: Full=Ubiquitin thioesterase 14; AltName: Full=Ubiquitin-specific-processing protease 14 && PF00443:Ubiquitin carboxyl-terminal hydrolase	UCH
Scaffold-6.74	133.947	118.736	113.708	190.137	130.179	148.513	133.21	125.069	107.52	protein_coding_gene	Scaffold-6	1300928	1301945	+	1018	-	- && A1A4P4.1 RecName: Full=Growth arrest and DNA damage-inducible proteins-interacting protein 1; AltName: Full=39S ribosomal protein L59, mitochondrial; Short=MRP-L59 && PF10147:Growth arrest and DNA-damage-inducible proteins-interacting protein 1	-
Scaffold-126.70	112.614	129.584	137.59	157.025	147.854	168.394	135.781	99.6085	111.947	protein_coding_gene	Scaffold-126	1222611	1229785	+	1138	-	- && - && -	-
Scaffold-64.66	116.542	120.255	134.911	146.505	138.239	167.171	124.612	113.958	136.654	protein_coding_gene	Scaffold-64	1806084	1826298	-	2692	-	- && Q6NYL5.2 RecName: Full=Alanine aminotransferase 2-like; Short=ALT2; AltName: Full=Glutamate pyruvate transaminase 2; Short=GPT 2; AltName: Full=Glutamic--alanine transaminase 2; AltName: Full=Glutamic--pyruvic transaminase 2 && PF00155:Aminotransferase class I and II	Aminotran_1_2
Scaffold-12.200	115.593	148.612	173.19	132.98	116.155	118.456	142.353	115.286	135.964	protein_coding_gene	Scaffold-12	4474362	4489406	+	1735	-	- && O42630.1 RecName: Full=Vacuolar protease A; AltName: Full=Aspartic endopeptidase pep2; AltName: Full=Aspartic protease pep2; Flags: Precursor && PF00026:Eukaryotic aspartyl protease	Asp
Scaffold-72.342	122.735	129.086	119.033	173.511	137.147	138.558	123.382	133.547	121.346	protein_coding_gene	Scaffold-72	6384534	6388809	-	1944	-	- && B0VZS1.1 RecName: Full=Eukaryotic translation initiation factor 3 subunit G; Short=eIF3g; AltName: Full=Eukaryotic translation initiation factor 3 RNA-binding subunit; Short=eIF-3 RNA-binding subunit; AltName: Full=Eukaryotic translation initiation factor 3 subunit 4 && PF00076:RNA recognition motif. (a.k.a. RRM, RBD, or RNP domain)|PF12353:Eukaryotic translation initiation factor 3 subunit G	RRM_1
Scaffold-23.143	120.894	140.589	125.083	146.873	126.638	147.428	138.457	128.173	123.693	protein_coding_gene	Scaffold-23	2798473	2804256	+	1418	-	- && Q5XGW6.1 RecName: Full=Charged multivesicular body protein 4b; AltName: Full=Chromatin-modifying protein 4b; Short=CHMP4b && PF03357:Snf7	ESCRT-III
Scaffold-322.13	126.249	107.147	131.07	199.119	112.066	127.238	141.471	128.65	115.584	protein_coding_gene	Scaffold-322	291658	313451	+	2566	-	- && Q7KKH3.1 RecName: Full=Protein SDA1 homolog; AltName: Full=Mystery protein 45A && PF08158:NUC130/3NT domain|PF05285:SDA1	-
Scaffold-350.6	123.523	120.694	113.486	260.474	118.751	132.435	121.712	104.85	91.7022	protein_coding_gene	Scaffold-350	170504	175916	+	666	-	- && Q08CN0.1 RecName: Full=Trafficking protein particle complex subunit 2 && PF04628:Sedlin, N-terminal conserved region	-
Scaffold-159.39	125.155	121.852	130.162	232.625	129.035	122.14	117.534	106.368	102.305	protein_coding_gene	Scaffold-159	659830	665825	-	777	-	- && Q6DE08.1 RecName: Full=Aurora kinase B-A; AltName: Full=Aurora/IPL1-related kinase 2-A; Short=AIRK2-A; Short=XAIRK2-A; AltName: Full=Serine/threonine-protein kinase 12-A; AltName: Full=Serine/threonine-protein kinase aurora-B-A; Short=xAurora-B && PF00069:Protein kinase domain|PF03671:Ubiquitin fold modifier 1 protein	Pkinase
Scaffold-967.3	149.465	108.346	154.206	133.251	150.343	107.821	137.401	135.64	109.859	protein_coding_gene	Scaffold-967	34483	50260	+	1792	-	- && P21845.2 RecName: Full=Tryptase beta-2; Short=Tryptase-2; AltName: Full=Mast cell protease 6; Short=mMCP-6; Flags: Precursor && PF00089:Trypsin	Trypsin
Scaffold-9.40	115.363	139.683	134.704	105.182	145.075	161.315	120.934	131.987	129.575	protein_coding_gene	Scaffold-9	522521	534228	-	1959	-	- && Q8BFR5.1 RecName: Full=Elongation factor Tu, mitochondrial; Flags: Precursor && PF03143:Elongation factor Tu C-terminal domain|PF00009:Elongation factor Tu GTP binding domain|PF03144:Elongation factor Tu domain 2	GTP_EFTU
Scaffold-64.54	518.283	197.184	1.38528	0.224785	108.679	216.897	12.36	5.37098	122.286	protein_coding_gene	Scaffold-64	1422443	1426310	+	1407	-	- && - && PF03103:Domain of unknown function (DUF243)	-
Scaffold-752.8	132.766	120.515	98.5723	182.541	137.02	153.076	120.497	125.781	109.259	protein_coding_gene	Scaffold-752	138133	157513	-	959	-	- && Q8MT80.1 RecName: Full=GPI mannosyltransferase 4; AltName: Full=GPI mannosyltransferase IV; Short=GPI-MT-IV && PF05497:Destabilase	-
Scaffold-167.10	121.406	124.601	108.972	204.469	143.179	122.343	120.654	125.513	106.368	protein_coding_gene	Scaffold-167	212484	213642	-	471	-	- && Q6EGX7.1 RecName: Full=Ubiquitin-like protein 5; AltName: Full=Beacon protein >Q791B0.1 RecName: Full=Ubiquitin-like protein 5; AltName: Full=Beacon protein >Q9BZL1.1 RecName: Full=Ubiquitin-like protein 5 >Q9EPV8.1 RecName: Full=Ubiquitin-like protein 5 >Q3T0Z3.1 RecName: Full=Ubiquitin-like protein 5 && -	-
Scaffold-105.16	102.309	138.648	108.737	147.362	155.469	133.064	103.497	131.153	156.245	protein_coding_gene	Scaffold-105	268171	290991	-	954	-	- && Q13247.2 RecName: Full=Serine/arginine-rich splicing factor 6; AltName: Full=Pre-mRNA-splicing factor SRP55; AltName: Full=Splicing factor, arginine/serine-rich 6 && PF00076:RNA recognition motif. (a.k.a. RRM, RBD, or RNP domain)	RRM_1
Scaffold-332.14	120.976	111.572	120.84	226.595	121.001	134.844	131.207	106.693	99.0779	protein_coding_gene	Scaffold-332	258406	266188	+	1647	-	- && P53163.1 RecName: Full=54S ribosomal protein L12, mitochondrial; AltName: Full=Mitochondrial-nucleoid protein 1; Flags: Precursor && PF00201:UDP-glucoronosyl and UDP-glucosyl transferase|PF16320:Ribosomal protein L7/L12 dimerisation domain|PF00542:Ribosomal protein L7/L12 C-terminal domain	UDPGT
Scaffold-10.194	125.64	124.346	121.323	226.845	111.915	98.8222	140.622	106.44	109.953	protein_coding_gene	Scaffold-10	3788595	3796618	-	1038	-	- && - && -	-
Scaffold-327.13	131.668	110.845	122.283	176.592	118.687	136.741	130.367	114.264	124.143	protein_coding_gene	Scaffold-327	159087	173078	+	874	-	- && B3Y064.1 RecName: Full=Leptin receptor gene-related protein; AltName: Full=Endospanin-1; AltName: Full=OB-R gene-related protein; Short=OB-RGRP && PF04133:Vacuolar protein sorting 55	-
Scaffold-831.1	58.0617	123.39	79.2703	11.5099	154.326	190.192	173.219	141.267	233.234	protein_coding_gene	Scaffold-831	4719	20683	+	948	-	- && - && PF00379:Insect cuticle protein	Chitin_bind_4
Scaffold-169.35	137.928	150.504	137.513	79.2999	120.668	100.087	126.624	149.42	161.677	protein_coding_gene	Scaffold-169	687218	700687	+	3071	-	- && P23128.3 RecName: Full=Putative ATP-dependent RNA helicase me31b; AltName: Full=Maternal expression at 31B && PF00271:Helicase conserved C-terminal domain|PF00270:DEAD/DEAH box helicase	DEAD
Scaffold-61.21	118.347	103.027	113.859	135.049	163.105	150.029	118.027	139.565	122.481	protein_coding_gene	Scaffold-61	419633	444867	-	2000	-	- && Q17NV8.1 RecName: Full=Facilitated trehalose transporter Tret1 && PF00083:Sugar (and other) transporter	Sugar_tr
Scaffold-33.39	126.766	92.9983	87.8734	219.404	117.106	158.82	140.803	108.345	104.088	protein_coding_gene	Scaffold-33	491152	496147	-	573	-	- && Q503Y7.1 RecName: Full=Peptidyl-prolyl cis-trans isomerase NIMA-interacting 4; AltName: Full=Parvulin-14; Short=Par14; AltName: Full=Peptidyl-prolyl cis-trans isomerase Pin4; Short=PPIase Pin4; AltName: Full=Rotamase Pin4 && PF13616:PPIC-type PPIASE domain	-
Scaffold-15099.55	544.773	0	0	2.21946	0	0	606.857	0	0.334834	protein_coding_gene	Scaffold-15099	635287	636512	+	285	-	- && - && -	-
Scaffold-62.34	107.231	148.847	137.957	21.6206	119.884	129.417	114.979	159.082	215.102	protein_coding_gene	Scaffold-62	561170	592835	-	1653	-	- && Q1HPU0.1 RecName: Full=Tropomyosin-1 && PF00261:Tropomyosin	-
Scaffold-96.133	130.771	117.538	112.517	150.331	133.637	138.304	116.351	130.426	123.322	protein_coding_gene	Scaffold-96	2902398	2911798	+	1560	-	- && Q3SZ52.1 RecName: Full=Ubiquitin-conjugating enzyme E2 variant 1; Short=UEV-1 >Q13404.2 RecName: Full=Ubiquitin-conjugating enzyme E2 variant 1; Short=UEV-1; AltName: Full=CROC-1; AltName: Full=TRAF6-regulated IKK activator 1 beta Uev1A && PF00179:Ubiquitin-conjugating enzyme	UQ_con
Scaffold-375.16	116.886	108.985	88.2402	229.693	113.032	163.532	127.018	89.6645	115.045	protein_coding_gene	Scaffold-375	263482	292694	+	2442	-	- && Q9VU68.1 RecName: Full=Actin-interacting protein 1; Short=AIP1; AltName: Full=Protein flare && -	-
Scaffold-63.42	129.784	110.51	121.759	182.047	112.94	124.685	131.288	136.855	101.678	protein_coding_gene	Scaffold-63	833753	855257	+	1832	-	- && Q6P806.1 RecName: Full=Sorting and assembly machinery component 50 homolog && PF01103:Surface antigen	-
Scaffold-502.4	166.363	95.6086	84.4033	220.652	109.746	121.207	140.517	105.768	104.253	protein_coding_gene	Scaffold-502	43404	55778	+	984	-	- && Q8K273.1 RecName: Full=Membrane magnesium transporter 1; AltName: Full=ER membrane protein complex subunit 5; AltName: Full=Transmembrane protein 32 >B5DF51.1 RecName: Full=Membrane magnesium transporter 1; AltName: Full=ER membrane protein complex subunit 5; AltName: Full=Transmembrane protein 32 && PF10270:Membrane magnesium transporter	-
Scaffold-12.197	127.619	100.554	102.978	227.407	117.833	132.885	128.578	109.993	100.24	protein_coding_gene	Scaffold-12	4441849	4447819	+	694	-	- && Q9VZD5.1 RecName: Full=Probable 28S ribosomal protein S6, mitochondrial; Short=MRP-S6; Short=S6mt && PF01250:Ribosomal protein S6	-
Scaffold-189.18	120.344	106.19	106.601	212.179	124.059	130.657	124.8	118.876	101.542	protein_coding_gene	Scaffold-189	443586	484925	-	1545	-	- && Q06AT3.1 RecName: Full=Ubiquitin carboxyl-terminal hydrolase isozyme L5; Short=UCH-L5; AltName: Full=Ubiquitin thioesterase L5 && PF01088:Ubiquitin carboxyl-terminal hydrolase, family 1	-
Scaffold-2.114	116.909	119.602	110.715	150.415	135.871	140.742	140.781	111.819	115.65	protein_coding_gene	Scaffold-2	2224499	2232298	+	1024	-	- && Q9Y2Z0.3 RecName: Full=Protein SGT1 homolog; AltName: Full=Protein 40-6-3; AltName: Full=Sgt1; AltName: Full=Suppressor of G2 allele of SKP1 homolog && PF05002:SGS domain|PF04969:CS domain	-
Scaffold-64.33	110.857	105.28	101.809	208.46	125.958	137.921	130.036	111.247	108.863	protein_coding_gene	Scaffold-64	959095	966851	-	1037	-	- && Q8BMB3.1 RecName: Full=Eukaryotic translation initiation factor 4E type 2; Short=eIF-4E type 2; Short=eIF4E type 2; Short=eIF4E-2; Short=mRNA cap-binding protein type 2; AltName: Full=Eukaryotic translation initiation factor 4E-like 3; AltName: Full=eIF4E-like protein 4E-LP && PF01652:Eukaryotic initiation factor 4E	-
Scaffold-248.23	315.844	51.2597	4.89414	1.5635	322.144	261.031	2.9529	2.29687	176.164	protein_coding_gene	Scaffold-248	308054	308761	+	708	-	- && P80233.1 RecName: Full=Cuticle protein 67, isoform B; AltName: Full=LM-ACP 67B; Short=LM-67B [Locusta migratoria] && PF11018:Pupal cuticle protein C1	-
Scaffold-69.46	145.931	127.941	123.143	205.222	90.4901	112.244	130.304	107.02	94.9681	protein_coding_gene	Scaffold-69	941687	950451	+	2492	-	- && P36537.1 RecName: Full=UDP-glucuronosyltransferase 2B10; Short=UDPGT 2B10; Flags: Precursor && PF00201:UDP-glucoronosyl and UDP-glucosyl transferase	UDPGT
Scaffold-237.14	113.974	97.3176	113.846	216.894	96.1955	138.032	141.76	118.124	100.505	protein_coding_gene	Scaffold-237	242949	245288	-	1090	-	- && - && -	-
Scaffold-96.164	75.42	110.267	14.1383	15.0606	368.934	233.359	110.211	85.6659	122.4	protein_coding_gene	Scaffold-96	3329817	3337818	-	651	-	- && - && -	-
Scaffold-50.108	125.998	107.346	144.944	164.733	142.344	124.925	114.441	89.5025	119.365	protein_coding_gene	Scaffold-50	1507249	1525117	+	5346	-	- && - && -	-
Scaffold-14.8	134.422	118.215	105.387	167.11	137.782	139.597	98.8412	111.97	115.33	protein_coding_gene	Scaffold-14	183730	203751	-	3366	-	- && P40939.2 RecName: Full=Trifunctional enzyme subunit alpha, mitochondrial; AltName: Full=78 kDa gastrin-binding protein; AltName: Full=TP-alpha; Includes: RecName: Full=Long-chain enoyl-CoA hydratase; Includes: RecName: Full=Long chain 3-hydroxyacyl-CoA dehydrogenase; Flags: Precursor && PF02737:3-hydroxyacyl-CoA dehydrogenase, NAD binding domain|PF00378:Enoyl-CoA hydratase/isomerase|PF00725:…	3HCDH_N
Scaffold-167.62	96.7786	110.695	124.788	191.247	126.096	172.026	97.2583	93.735	111.252	protein_coding_gene	Scaffold-167	902152	909205	+	597	-	- && Q9VXE0.1 RecName: Full=Probable small nuclear ribonucleoprotein G; Short=snRNP-G; AltName: Full=Sm protein G; Short=Sm-G; Short=SmG && PF01423:LSM domain	LSM
Scaffold-81.48	125.793	103.496	102.552	226.569	115.936	129.067	115.889	111.293	91.5717	protein_coding_gene	Scaffold-81	1295678	1336226	+	3836	-	- && P91679.2 RecName: Full=Peptide transporter family 1; AltName: Full=Oligopeptide transporter 1; AltName: Full=Protein YIN && PF00854:POT family|PF07541:Eukaryotic translation initiation factor 2 alpha subunit|PF00575:S1 RNA binding domain	S1
Scaffold-14.108	227.825	109.006	134.358	104.014	71.3097	48.6217	267.821	103.229	55.3204	protein_coding_gene	Scaffold-14	2267444	2274128	+	897	-	- && A1L1C5.1 RecName: Full=2-oxo-4-hydroxy-4-carboxy-5-ureidoimidazoline decarboxylase; Short=OHCU decarboxylase; AltName: Full=Parahox neighbor; AltName: Full=Ureidoimidazoline (2-oxo-4-hydroxy-4-carboxy-5-) decarboxylase && PF09349:OHCU decarboxylase	-
Scaffold-452.13	115.013	141.388	151.852	169.599	92.7997	123.448	125.957	78.2526	119.002	protein_coding_gene	Scaffold-452	239899	241948	-	676	-	- && - && -	-
Scaffold-576.1	150.685	132.51	131.643	185.463	175.588	71.3547	94.9772	67.6836	106.738	protein_coding_gene	Scaffold-576	9104	49646	+	3611	-	- && Q9VV72.2 RecName: Full=Multiple inositol polyphosphate phosphatase 1; AltName: Full=2,3-bisphosphoglycerate 3-phosphatase; Short=2,3-BPG phosphatase; AltName: Full=Inositol (1,3,4,5)-tetrakisphosphate 3-phosphatase; Short=Ins(1,3,4,5)P(4) 3-phosphatase; Flags: Precursor && PF07679:Immunoglobulin I-set domain|PF00650:CRAL/TRIO domain|PF00328:Histidine phosphatase superfamily (branch 2)	Acid_phosphat_A
Scaffold-290.120	121.098	163.779	134.463	57.3071	135.79	109.67	109.357	148.626	135.346	protein_coding_gene	Scaffold-290	1070431	1096028	+	1824	-	- && - && -	-
Scaffold-56.40	134.264	127.253	105.024	187.48	116.854	117.671	121.623	105.156	98.3948	protein_coding_gene	Scaffold-56	1052586	1055211	-	997	-	- && Q5RET9.1 RecName: Full=Protein SDE2 homolog && PF13019:Telomere stability and silencing	-
Scaffold-17.327	111.293	95.9757	106.377	227.819	117.589	133.555	112.114	103.547	105.076	protein_coding_gene	Scaffold-17	7083375	7099255	+	2898	-	- && Q9R1P3.1 RecName: Full=Proteasome subunit beta type-2; AltName: Full=Macropain subunit C7-I; AltName: Full=Multicatalytic endopeptidase complex subunit C7-I; AltName: Full=Proteasome component C7-I && PF00472:RF-1 domain|PF00227:Proteasome subunit|PF00078:Reverse transcriptase (RNA-dependent DNA polymerase)	Proteasome
Scaffold-9.162	183.21	91.1604	127.058	308.472	81.3796	60.6398	111.507	71.0641	74.174	protein_coding_gene	Scaffold-9	2773885	2776156	-	669	-	- && - && -	-
Scaffold-22.59	116.364	134.48	107.136	177.677	113.407	134.837	118.095	108.322	98.2913	protein_coding_gene	Scaffold-22	1630378	1637392	+	1133	-	- && P10605.2 RecName: Full=Cathepsin B; AltName: Full=Cathepsin B1; Contains: RecName: Full=Cathepsin B light chain; Contains: RecName: Full=Cathepsin B heavy chain; Flags: Precursor && PF00112:Papain family cysteine protease|PF08127:Peptidase family C1 propeptide	Peptidase_C1
Scaffold-17.176	113.783	115.66	106.558	186.43	121.358	133.77	118.671	99.1746	112.619	protein_coding_gene	Scaffold-17	3752120	3761339	-	816	-	- && Q86KD0.1 RecName: Full=BolA-like protein DDB_G0274169 && PF01722:BolA-like protein	-
Scaffold-146.21	170.49	138.341	90.2356	147.104	122.877	127.964	136.283	90.0963	81.3724	protein_coding_gene	Scaffold-146	457230	457487	-	258	-	- && Q9VHI4.1 RecName: Full=Probable splicing factor 3B subunit 5; Short=SF3b5; AltName: Full=Pre-mRNA-splicing factor SF3b 10 kDa subunit && PF07189:Splicing factor 3B subunit 10 (SF3b10)	-
Scaffold-185.37	108.231	113.751	89.2968	225.169	109.001	123	128.721	102.662	104.253	protein_coding_gene	Scaffold-185	550082	558007	-	1038	-	- && - && PF09812:Mitochondrial ribosomal protein L28	-
Scaffold-457.19	98.4943	93.7793	85.0918	199.135	128.709	141.934	119.897	109.136	122.934	protein_coding_gene	Scaffold-457	327009	331885	+	1242	-	- && Q9U3Z7.1 RecName: Full=NHP2-like protein 1 homolog; AltName: Full=Protein hoi-polloi && PF01248:Ribosomal protein L7Ae/L30e/S12e/Gadd45 family	-
Scaffold-578.7	105.556	102.042	94.3881	230.907	129.867	132.966	95.7306	107.509	99.2279	protein_coding_gene	Scaffold-578	128348	130941	-	678	-	- && P49963.2 RecName: Full=Signal recognition particle 19 kDa protein; Short=SRP19 && PF01922:SRP19 protein	SRP19
Scaffold-134.10	169.496	184.86	178.238	66.5426	47.1382	63.3254	199.469	148.222	40.6276	protein_coding_gene	Scaffold-134	251911	269227	+	404	-	- && - && -	-
Scaffold-42.112	104.749	123.282	103.739	150.396	108.889	140.568	134.459	106.138	121.008	protein_coding_gene	Scaffold-42	2002783	2008033	-	429	-	- && Q9VW56.1 RecName: Full=Probable prefoldin subunit 6 && PF01920:Prefoldin subunit	-
Scaffold-564.4	91.3817	123.718	102.307	106.658	158.667	152.248	110.391	143.647	102.13	protein_coding_gene	Scaffold-564	194462	227755	-	1794	-	- && P80683.1 RecName: Full=Larval cuticle protein A3A; AltName: Full=TM-LCP A3A; Short=TM-A3A && PF00379:Insect cuticle protein	Chitin_bind_4
Scaffold-412.17	123.725	112.674	128.694	139.569	128.038	122.702	117.269	105.514	104.65	protein_coding_gene	Scaffold-412	233512	236479	+	1252	-	- && Q99N46.1 RecName: Full=Brain protein I3 && PF10164:Uncharacterized conserved protein (DUF2367)	-
Scaffold-817.1	97.7507	98.831	86.6759	242.827	135.275	120.429	92.3053	103.008	103.745	protein_coding_gene	Scaffold-817	37463	42632	-	872	-	- && Q6NYP0.1 RecName: Full=Transmembrane protein 208 && PF05620:Protein of unknown function (DUF788)	-
Scaffold-257.6	111.682	119.595	121.673	132.495	117.606	122.748	113.316	111.048	130.348	protein_coding_gene	Scaffold-257	130719	137474	+	1585	-	- && Q9U0S4.1 RecName: Full=V-type proton ATPase subunit D; Short=V-ATPase subunit D; AltName: Full=Vacuolar proton pump subunit D && PF01813:ATP synthase subunit D	ATP-synt_D
Scaffold-75.87	76.167	101.492	105.939	41.759	217.983	213.591	33.5278	209.122	78.9034	protein_coding_gene	Scaffold-75	1651226	1651687	-	462	-	- && B0VYY3.1 RecName: Full=Cytochrome c oxidase subunit 5A, mitochondrial; AltName: Full=Cytochrome c oxidase polypeptide Va; Flags: Precursor && PF02284:Cytochrome c oxidase subunit Va	-
Scaffold-327.17	144.464	85.0837	119.469	154.255	109.657	108.892	135.71	131.584	87.9656	protein_coding_gene	Scaffold-327	258367	278779	+	1752	-	- && Q5EA59.1 RecName: Full=Protein ABHD4; AltName: Full=Alpha/beta hydrolase domain-containing protein 4; Short=Abhydrolase domain-containing protein 4; AltName: Full=Alpha/beta-hydrolase 4; AltName: Full=Lyso-N-acylphosphatidylethanolamine lipase && PF00561:alpha/beta hydrolase fold	Abhydrolase_1
Scaffold-145.15	107.136	120.928	97.3487	159.853	98.1565	137.302	138.16	108.641	108.69	protein_coding_gene	Scaffold-145	293700	304175	-	921	-	- && - && PF05497:Destabilase	-
Scaffold-320.12	112.947	107.767	107.3	203.352	95.8377	122.655	122.992	105.499	96.5826	protein_coding_gene	Scaffold-320	213053	223839	+	1322	-	- && Q8BWM0.3 RecName: Full=Prostaglandin E synthase 2; AltName: Full=GATE-binding factor 1; Short=GBF-1; AltName: Full=Microsomal prostaglandin E synthase 2; Short=mPGES-2; Contains: RecName: Full=Prostaglandin E synthase 2 truncated form && PF14497:Glutathione S-transferase, C-terminal domain|PF00462:Glutaredoxin	-
Scaffold-694.9	111.688	137.433	127.734	82.3343	129.886	154.477	107.993	109.349	113.211	protein_coding_gene	Scaffold-694	216580	225716	+	1041	-	- && Q8BWP5.1 RecName: Full=Alpha-tocopherol transfer protein; Short=Alpha-TTP && PF00650:CRAL/TRIO domain	-
Scaffold-368.1	94.6971	108.763	119.556	170.522	119.833	135.207	108.281	105.708	110.011	protein_coding_gene	Scaffold-368	9502	15138	+	1047	-	- && B0BNE5.1 RecName: Full=S-formylglutathione hydrolase; Short=FGH; AltName: Full=Esterase D && PF00756:Putative esterase	-
Scaffold-49.72	92.3382	146.422	154.919	35.3088	117.001	100.555	112.326	127.341	184.695	protein_coding_gene	Scaffold-49	1655017	1680261	+	945	-	- && Q56K12.3 RecName: Full=Ornithine decarboxylase antizyme 1; Short=ODC-Az && PF02100:Ornithine decarboxylase antizyme	-
Scaffold-923.1	198.652	59.5537	1.31252	0	467.876	182.053	4.03157	2.15333	154.915	protein_coding_gene	Scaffold-923	11807	22684	-	1155	-	- && P81225.1 RecName: Full=Cuticle protein 21; AltName: Full=LM-ACP 21 && PF00179:Ubiquitin-conjugating enzyme|PF00379:Insect cuticle protein	UQ_con
Scaffold-175.17	111.109	109.943	123.567	152.84	113.63	115.414	126.706	108.092	105.473	protein_coding_gene	Scaffold-175	153297	160942	-	1254	-	- && B0WEV5.1 RecName: Full=ATPase ASNA1 homolog; AltName: Full=Arsenical pump-driving ATPase homolog; AltName: Full=Arsenite-stimulated ATPase && PF02374:Anion-transporting ATPase	-
Scaffold-208.30	105.583	106.628	80.9461	200.689	120.744	132.692	105.948	96.8869	114.109	protein_coding_gene	Scaffold-208	724182	739852	+	1323	-	- && - && PF06102:Domain of unknown function (DUF947)	-
Scaffold-17.357	103.112	107.08	109.46	148.221	130.253	125.182	109.221	115.663	110.854	protein_coding_gene	Scaffold-17	7839992	7867358	+	2759	-	- && Q3ZBV8.1 RecName: Full=Threonine--tRNA ligase, cytoplasmic; AltName: Full=Threonyl-tRNA synthetase; Short=ThrRS && PF02824:TGS domain|PF03129:Anticodon binding domain|PF00587:tRNA synthetase class II core domain (G, H, P, S and T)|PF07973:Threonyl and Alanyl tRNA synthetase second additional domain	tRNA-synt_2b
Scaffold-10.114	108.74	95.5509	106.763	163.601	114.2	132.482	133.411	96.6908	102.641	protein_coding_gene	Scaffold-10	2239249	2251915	-	926	-	- && Q5R587.1 RecName: Full=DNA-directed RNA polymerases I, II, and III subunit RPABC1; Short=RNA polymerases I, II, and III subunit ABC1; AltName: Full=DNA-directed RNA polymerase II subunit E; AltName: Full=RPB5 homolog && PF01191:RNA polymerase Rpb5, C-terminal domain|PF03871:RNA polymerase Rpb5, N-terminal domain	-
Scaffold-213.29	82.1318	104.426	104.986	229.242	99.9545	148.645	104.6	103.499	73.9732	protein_coding_gene	Scaffold-213	355915	358010	+	427	-	- && - && -	-
Scaffold-292.25	90.5039	91.8074	127.611	190.444	97.0862	107.678	137.742	96.2749	112.256	protein_coding_gene	Scaffold-292	463263	463727	-	465	-	- && - && -	-
Scaffold-53.80	106.435	93.3721	103.19	165.485	120.678	137.31	98.8608	111.833	114.075	protein_coding_gene	Scaffold-53	1538168	1564901	+	1786	-	- && Q6DCP1.1 RecName: Full=FAD-dependent oxidoreductase domain-containing protein 1 && PF01266:FAD dependent oxidoreductase	DAO
Scaffold-5.214	109.151	104.809	95.575	170.145	124.396	131.678	110.118	95.9408	108.697	protein_coding_gene	Scaffold-5	4633067	4642971	+	1014	-	- && Q28ID3.2 RecName: Full=Glutaredoxin-3; AltName: Full=Thioredoxin-like protein 2 && PF00462:Glutaredoxin|PF00085:Thioredoxin	-
Scaffold-86.71	122.64	105.456	103.148	152.804	128.076	130.748	99.2856	109.669	97.6902	protein_coding_gene	Scaffold-86	1460889	1472930	+	1898	-	- && P26270.6 RecName: Full=26S proteasome non-ATPase regulatory subunit 7; AltName: Full=26S proteasome regulatory subunit RPN8; AltName: Full=26S proteasome regulatory subunit S12; AltName: Full=Proteasome subunit p39B; AltName: Full=Proteasome subunit p40; AltName: Full=Protein Mov34 && PF13012:Maintenance of mitochondrial structure and function|PF01398:JAB1/Mov34/MPN/PAD-1 ubiquitin protease	Mov34
Scaffold-18.95	126.206	138.531	133.732	82.7217	107.997	89.024	126.634	118.14	126.076	protein_coding_gene	Scaffold-18	2165126	2206076	+	1753	-	- && D2WKD9.2 RecName: Full=Farnesol dehydrogenase; AltName: Full=NADP+-dependent farnesol dehydrogenase 1; Short=AaSDR-1 && PF00106:short chain dehydrogenase	adh_short
Scaffold-48.11	99.281	112.685	115.026	108.492	141.129	125.122	113.754	108.647	124.704	protein_coding_gene	Scaffold-48	104418	121622	-	1959	-	- && Q9V3J1.2 RecName: Full=V-type proton ATPase subunit H; Short=V-ATPase subunit H; AltName: Full=Vacuolar proton pump subunit H; AltName: Full=Vacuolar proton pump subunit SFD && PF11698:V-ATPase subunit H|PF03224:V-ATPase subunit H	V-ATPase_H
Scaffold-346.8	125.804	110.808	110.409	112.74	141.223	126.033	82.8696	117.16	120.69	protein_coding_gene	Scaffold-346	107560	127024	+	1477	-	- && Q9VSA3.1 RecName: Full=Probable medium-chain specific acyl-CoA dehydrogenase, mitochondrial; Short=MCAD; Flags: Precursor && PF02771:Acyl-CoA dehydrogenase, N-terminal domain|PF00441:Acyl-CoA dehydrogenase, C-terminal domain|PF02770:Acyl-CoA dehydrogenase, middle domain	-
Scaffold-226.26	113.097	125.033	119.085	117.737	117.883	112.341	134.568	99.2653	108.314	protein_coding_gene	Scaffold-226	488545	495993	-	822	-	- && Q28FC1.1 RecName: Full=Ubiquitin-conjugating enzyme E2 W; AltName: Full=E2 ubiquitin-conjugating enzyme W; AltName: Full=N-terminal E2 ubiquitin-conjugating enzyme; AltName: Full=Ubiquitin carrier protein W; AltName: Full=Ubiquitin-protein ligase W && PF00179:Ubiquitin-conjugating enzyme	UQ_con
Scaffold-673.4	122.732	119.164	110.036	124.476	112.876	127.279	109.194	103.493	117.694	protein_coding_gene	Scaffold-673	59974	71808	+	2100	-	- && Q25531.1 RecName: Full=V-type proton ATPase subunit d; Short=V-ATPase subunit d; AltName: Full=M40; AltName: Full=V-ATPase 40 kDa subunit; AltName: Full=Vacuolar proton pump subunit d && PF01992:ATP synthase (C/AC39) subunit	-
Scaffold-157.40	97.4518	155.059	129.189	191.366	127.616	83.6213	90.7218	74.0774	96.2929	protein_coding_gene	Scaffold-157	693234	715698	-	1875	-	- && Q32LH7.1 RecName: Full=Cytochrome b5 reductase 4; AltName: Full=Flavohemoprotein b5/b5R; Short=b5+b5R; AltName: Full=cb5/cb5R && PF00173:Cytochrome b5-like Heme/Steroid binding domain|PF00175:Oxidoreductase NAD-binding domain|PF00970:Oxidoreductase FAD-binding domain	NAD_binding_1
Scaffold-70.33	140.466	90.8293	105.845	105.195	117.717	93.161	177.637	125.529	86.6957	protein_coding_gene	Scaffold-70	502819	544386	-	1377	-	- && Q9BTX7.2 RecName: Full=Alpha-tocopherol transfer protein-like && PF00650:CRAL/TRIO domain	-
Scaffold-36.50	98.7116	113.445	124.89	125.776	116.66	136.982	121.121	101.362	103.288	protein_coding_gene	Scaffold-36	920371	964109	-	4662	-	- && Q9VN93.2 RecName: Full=Putative cysteine proteinase CG12163; Flags: Precursor && PF08246:Cathepsin propeptide inhibitor domain (I29)|PF00112:Papain family cysteine protease	Peptidase_C1
Scaffold-368.4	70.9302	124.745	92.3155	28.4129	85.0334	160.518	162.249	143.356	169.293	protein_coding_gene	Scaffold-368	38814	57351	-	2204	-	- && Q16822.3 RecName: Full=Phosphoenolpyruvate carboxykinase [GTP], mitochondrial; Short=PEPCK-M; Flags: Precursor && PF00821:Phosphoenolpyruvate carboxykinase	-
Scaffold-68.36	118.353	99.8441	109.873	220.49	94.4738	106.97	118.882	83.8655	82.8144	protein_coding_gene	Scaffold-68	838851	855376	-	2247	-	- && O45211.1 RecName: Full=TATA-box-binding protein; AltName: Full=TATA sequence-binding protein; AltName: Full=TATA-binding factor; AltName: Full=TATA-box factor; AltName: Full=Transcription initiation factor TFIID TBP subunit && PF00352:Transcription factor TFIID (or TATA-binding protein, TBP)	-
Scaffold-86.64	113.96	97.7659	103.799	150.871	109.1	129.911	116.86	102.657	106.416	protein_coding_gene	Scaffold-86	1375937	1384616	+	1763	-	- && Q9W5E1.1 RecName: Full=RING-box protein 1A; AltName: Full=Regulator of cullins 1a; AltName: Full=dRbx1 && PF12678:RING-H2 zinc finger|PF03564:Protein of unknown function (DUF1759)	-
Scaffold-9.312	99.3303	114.241	93.764	142.573	115.13	133.172	120.262	107.726	104.189	protein_coding_gene	Scaffold-9	5680485	5696018	-	1514	-	- && Q5REJ1.1 RecName: Full=28S ribosomal protein S5, mitochondrial; Short=MRP-S5; Short=S5mt && PF00333:Ribosomal protein S5, N-terminal domain|PF03719:Ribosomal protein S5, C-terminal domain	-
Scaffold-174.2	103.002	113.863	108.637	110.14	133.072	93.5592	152.871	104.215	109.266	protein_coding_gene	Scaffold-174	40279	88049	-	2448	-	- && - && PF15929:Myofilin	-
Scaffold-136.33	110.066	106.356	102.843	168.729	101.749	117.066	112.99	102.523	105.32	protein_coding_gene	Scaffold-136	464798	470566	-	1254	-	- && Q9CZX5.2 RecName: Full=PIN2/TERF1-interacting telomerase inhibitor 1; AltName: Full=67-11-3 protein; AltName: Full=LPTS1; AltName: Full=Liver-related putative tumor suppressor; AltName: Full=Pin2-interacting protein X1; AltName: Full=TRF1-interacting protein 1 && PF01585:G-patch domain	G-patch
Scaffold-236.31	68.7288	89.8236	39.2525	22.485	258.002	191.686	123.687	80.1134	153.43	protein_coding_gene	Scaffold-236	573253	585478	+	640	-	- && Q7M4F3.1 RecName: Full=Endocuticle structural glycoprotein SgAbd-2 && PF00379:Insect cuticle protein	Chitin_bind_4
Scaffold-42.15	100.024	125.819	131.683	66.2113	130.742	119.729	106.103	119.775	126.689	protein_coding_gene	Scaffold-42	390798	437919	+	3776	-	- && P31410.1 RecName: Full=V-type proton ATPase subunit B; Short=V-ATPase subunit B; AltName: Full=Vacuolar proton pump subunit B && PF00306:ATP synthase alpha/beta chain, C terminal domain|PF00006:ATP synthase alpha/beta family, nucleotide-binding domain|PF00474:Sodium:solute symporter family|PF02874:ATP synthase alpha/beta family, beta-barrel domain	ATP-synt_ab
Scaffold-114.9	90.4079	99.9776	111.144	173.578	108.419	124.905	104.418	103.24	108.363	protein_coding_gene	Scaffold-114	143757	159255	+	1741	-	- && Q5BDC8.1 RecName: Full=Nucleolar protein 12 && PF00076:RNA recognition motif. (a.k.a. RRM, RBD, or RNP domain)	RRM_1
Scaffold-378.12	108.642	118.372	142.755	139.332	126.392	101.179	97.2543	94.1351	95.0256	protein_coding_gene	Scaffold-378	267797	275034	-	2136	-	- && Q4R4T0.1 RecName: Full=Dolichyl-diphosphooligosaccharide--protein glycosyltransferase subunit 1; AltName: Full=Dolichyl-diphosphooligosaccharide--protein glycosyltransferase 67 kDa subunit; AltName: Full=Ribophorin I; Short=RPN-I; AltName: Full=Ribophorin-1; Flags: Precursor && PF04597:Ribophorin I	-
Scaffold-5049.1	106.19	92.1502	79.3817	257.183	91.2924	128.329	96.7207	92.2536	79.4664	protein_coding_gene	Scaffold-5049	301	1417	+	281	-	- && P60901.1 RecName: Full=Proteasome subunit alpha type-6; AltName: Full=Macropain iota chain; AltName: Full=Multicatalytic endopeptidase complex iota chain; AltName: Full=Proteasome iota chain >P60900.1 RecName: Full=Proteasome subunit alpha type-6; AltName: Full=27 kDa prosomal protein; Short=PROS-27; Short=p27K; AltName: Full=Macropain iota chain; AltName: Full=Multicatalytic endopeptidase c…	Proteasome
Scaffold-134.11	107.731	85.2868	94.9872	134.263	113.33	129.624	99.8119	136.67	119.976	protein_coding_gene	Scaffold-134	273602	284776	+	2484	-	- && Q8JFP1.1 RecName: Full=Eukaryotic initiation factor 4A-II; Short=eIF-4A-II; Short=eIF4A-II; AltName: Full=ATP-dependent RNA helicase eIF4A-2 && PF00270:DEAD/DEAH box helicase|PF00271:Helicase conserved C-terminal domain	DEAD
Scaffold-72.235	116.348	97.9169	107.513	164.206	101.274	111.263	118.939	105.176	95.2242	protein_coding_gene	Scaffold-72	3783522	3791204	+	1407	-	- && Q2KIH4.1 RecName: Full=Ribosome biogenesis regulatory protein homolog && PF04939:Ribosome biogenesis regulatory protein (RRS1)	-
Scaffold-490.24	106.027	84.262	86.6745	218.782	96.9113	116.258	128.719	89.1526	86.4913	protein_coding_gene	Scaffold-490	375459	388751	-	897	-	- && Q9VH39.1 RecName: Full=Protein NDUFAF4 homolog && PF06784:Uncharacterised protein family (UPF0240)	-
Scaffold-10.59	125.02	119.704	119.693	113.066	86.6709	83.2276	167.411	120.35	76.7335	protein_coding_gene	Scaffold-10	1210658	1212854	+	1414	-	- && - && PF05350:Glycogen synthase kinase-3 binding	-
Scaffold-557.9	100.573	98.3957	95.4899	169.146	108.596	123.111	115.179	93.5388	107.809	protein_coding_gene	Scaffold-557	105292	113590	-	948	-	- && Q9V359.1 RecName: Full=Vacuolar protein sorting-associated protein 28 homolog; AltName: Full=ESCRT-I complex subunit VPS28 && PF03997:VPS28 protein	-
Scaffold-517.21	123.211	95.7768	127.695	74.8601	104.178	97.5973	118.987	143.889	120.822	EVM%20prediction%20Scaffold-517.21	Scaffold-517	248876	249232	-	357	-	- && - && -	-
Scaffold-61.87	117.004	123.008	126.292	133.676	103.033	88.1909	111.942	106.994	96.7767	protein_coding_gene	Scaffold-61	1673198	1693091	-	2405	-	- && Q9H694.2 RecName: Full=Protein bicaudal C homolog 1; Short=Bic-C && PF00013:KH domain|PF00536:SAM domain (Sterile alpha motif)	KH_1
Scaffold-10.25	186.268	125.763	103.459	150.443	61.0017	67.3399	172.235	86.2938	54.0906	protein_coding_gene	Scaffold-10	528661	538681	+	1706	-	- && O35045.1 RecName: Full=Uncharacterized zinc-type alcohol dehydrogenase-like protein YjmD && PF00107:Zinc-binding dehydrogenase|PF08240:Alcohol dehydrogenase GroES-like domain	ADH_N
Scaffold-15.192	105.079	117.265	120.044	107.399	113.421	118.936	106.419	99.3599	115.204	protein_coding_gene	Scaffold-15	4461452	4494022	+	1602	-	- && P41565.2 RecName: Full=Isocitrate dehydrogenase [NAD] subunit gamma 1, mitochondrial; AltName: Full=Isocitric dehydrogenase subunit gamma; AltName: Full=NAD(+)-specific ICDH subunit gamma; Flags: Precursor && PF00180:Isocitrate/isopropylmalate dehydrogenase	-
Scaffold-33.138	95.827	94.2803	86.885	180.665	97.196	122.834	118.089	107.351	96.5679	protein_coding_gene	Scaffold-33	2350099	2358355	-	1088	-	- && Q66L33.1 RecName: Full=Protein MAK16 homolog A; AltName: Full=MAK16-like protein A [Xenopus laevis] && PF01778:Ribosomal L28e protein family|PF04874:Mak16 protein C-terminal region	-
Scaffold-62.181	134.46	101.724	91.5549	114.44	115.525	138.462	104.86	96.6693	101.833	protein_coding_gene	Scaffold-62	2689850	2708591	+	2175	-	- && Q9V521.1 RecName: Full=Phenoloxidase 2; Short=PO A3; AltName: Full=Phenoloxidase subunit A3; AltName: Full=Processed phenoloxidase A3; Short=Pro-phenoloxidase A3; Flags: Precursor && PF03723:Hemocyanin, ig-like domain|PF00372:Hemocyanin, copper containing domain|PF03722:Hemocyanin, all-alpha domain	-
Scaffold-34.70	83.1811	98.7065	109.849	75.8445	140.703	104.094	103.195	141.537	142.158	protein_coding_gene	Scaffold-34	1020356	1041253	-	2281	-	- && Q9Y600.2 RecName: Full=Cysteine sulfinic acid decarboxylase; AltName: Full=Cysteine-sulfinate decarboxylase; AltName: Full=Sulfinoalanine decarboxylase && PF00282:Pyridoxal-dependent decarboxylase conserved domain	-
Scaffold-70.42	111.223	92.0599	106.103	158.349	114.428	121.989	106.765	93.8602	93.8906	protein_coding_gene	Scaffold-70	655214	660688	-	745	-	- && Q99N85.1 RecName: Full=28S ribosomal protein S18a, mitochondrial; Short=MRP-S18-a; Short=Mrps18a; Short=S18mt-a; AltName: Full=28S ribosomal protein S18-3, mitochondrial; Short=MRP-S18-3; Flags: Precursor && PF01084:Ribosomal protein S18	-
Scaffold-13.161	95.6705	107.716	96.3783	155.911	136.851	111.54	86.1704	103.65	104.66	protein_coding_gene	Scaffold-13	2698616	2719654	+	1137	-	- && D3ZTX0.1 RecName: Full=Transmembrane emp24 domain-containing protein 7; AltName: Full=p24 family protein gamma-3; Short=p24gamma3; AltName: Full=p27; Flags: Precursor && PF01105:emp24/gp25L/p24 family/GOLD	-
Scaffold-95.50	83.9331	90.8361	84.7839	166.098	110.791	135.01	112.188	101.249	113.155	protein_coding_gene	Scaffold-95	900083	904950	+	1728	-	- && Q9XXD4.1 RecName: Full=Putative H/ACA ribonucleoprotein complex subunit 2-like protein && PF01248:Ribosomal protein L7Ae/L30e/S12e/Gadd45 family	-
Scaffold-33.45	8.62508	93.2076	166.679	59.8509	130.715	166.756	113.071	182.409	73.7343	protein_coding_gene	Scaffold-33	566535	574835	-	827	-	- && - && -	-
Scaffold-11.17	110.314	89.0873	102.696	197.962	93.8108	110.501	109.312	94.6393	86.6352	protein_coding_gene	Scaffold-11	376170	443310	+	2442	-	- && Q3U0B3.1 RecName: Full=Dehydrogenase/reductase SDR family member 11; AltName: Full=Short-chain dehydrogenase/reductase family 24C member 1; Flags: Precursor && PF00106:short chain dehydrogenase	adh_short
Scaffold-44.129	120.298	115.96	100.18	101.928	76.9678	132.6	153.858	103.629	85.3655	protein_coding_gene	Scaffold-44	2176264	2180456	+	588	-	- && Q5BJ68.1 RecName: Full=NADH-cytochrome b5 reductase 2; Short=b5R.2 && PF00175:Oxidoreductase NAD-binding domain	NAD_binding_1
Scaffold-2.159	83.3125	86.2838	97.1953	226.059	98.0197	108.38	111.584	102.145	77.6619	protein_coding_gene	Scaffold-2	2781440	2786464	-	752	-	- && Q9TVQ5.1 RecName: Full=Transcription elongation factor SPT4; AltName: Full=DRB sensitivity-inducing factor small subunit; Short=DSIF small subunit; AltName: Full=dSpt4 && PF06093:Spt4/RpoE2 zinc finger	-
Scaffold-50.89	105.812	88.0827	98.7156	154.723	110.335	112.285	111.011	120.869	88.7209	protein_coding_gene	Scaffold-50	1197664	1200545	+	1992	-	- && Q99LH1.2 RecName: Full=Nucleolar GTP-binding protein 2 && PF01926:50S ribosome-binding GTPase|PF08153:NGP1NT (NUC091) domain	-
Scaffold-340.27	104.893	84.9056	105.199	107.874	121.78	128.407	106.928	132.591	97.2659	protein_coding_gene	Scaffold-340	365459	374929	-	2388	-	- && O02649.3 RecName: Full=60 kDa heat shock protein, mitochondrial; AltName: Full=60 kDa chaperonin; AltName: Full=CPN60; AltName: Full=Heat shock protein 60; Short=HSP-60; AltName: Full=Hsp60; AltName: Full=Mitochondrial matrix protein P1; Flags: Precursor && PF00118:TCP-1/cpn60 chaperonin family	-
Scaffold-3310.1	112.293	89.2334	98.1159	163.145	106.32	116.313	118.787	91.654	92.8369	protein_coding_gene	Scaffold-3310	73	3691	+	884	-	- && Q9NHP7.1 RecName: Full=Transcription initiation factor IIB; AltName: Full=General transcription factor TFIIB && PF00382:Transcription factor TFIIB repeat	-
Scaffold-107.89	100.844	102.777	87.2446	176.199	105.75	127.692	97.4242	93.5154	94.6796	protein_coding_gene	Scaffold-107	1709282	1716165	-	1786	-	- && Q5R9I5.1 RecName: Full=Aspartate--tRNA ligase, cytoplasmic; AltName: Full=Aspartyl-tRNA synthetase; Short=AspRS && PF00152:tRNA synthetases class II (D, K and N)	tRNA-synt_2
Scaffold-415.2	110.866	79.0941	119.859	126.492	117.673	117.084	117.224	119.572	77.2734	protein_coding_gene	Scaffold-415	14103	28412	-	1824	-	- && P21902.1 RecName: Full=Proclotting enzyme; Contains: RecName: Full=Proclotting enzyme light chain; Contains: RecName: Full=Proclotting enzyme heavy chain; Flags: Precursor && PF00089:Trypsin	Trypsin
Scaffold-758.2	106.758	96.1541	92.025	175.384	96.9486	119.238	109.567	94.0319	94.7518	protein_coding_gene	Scaffold-758	21795	24497	-	706	-	- && Q9VTJ8.2 RecName: Full=Mitochondrial import inner membrane translocase subunit TIM14 && -	-
Scaffold-123.13	115.636	106.594	104.074	112.29	101.197	116.451	120.484	106.811	99.7379	protein_coding_gene	Scaffold-123	267412	272349	-	952	-	- && Q95108.2 RecName: Full=Thioredoxin, mitochondrial; Short=MTRX; Short=Mt-Trx; AltName: Full=Thioredoxin-2; Flags: Precursor && PF00085:Thioredoxin	-
Scaffold-251.224	106.239	100.406	97.6168	167.618	99.7088	118.696	103.848	93.268	93.1799	protein_coding_gene	Scaffold-251	2883708	2899762	+	1401	-	- && Q29IK4.2 RecName: Full=39S ribosomal protein L22, mitochondrial; Short=L22mt; Short=MRP-L22; Flags: Precursor && PF00237:Ribosomal protein L22p/L17e	-
Scaffold-661.8	126.965	88.4227	116.849	127.447	103.714	109.628	125.219	101.156	80.7419	protein_coding_gene	Scaffold-661	135488	147248	-	1618	-	- && P48728.1 RecName: Full=Aminomethyltransferase, mitochondrial; AltName: Full=Glycine cleavage system T protein; Short=GCVT; Flags: Precursor && PF01571:Aminomethyltransferase folate-binding domain|PF08669:Glycine cleavage T-protein C-terminal barrel domain	GCV_T
Scaffold-327.11	115.188	101.297	114.796	72.8458	130.515	110.346	110.177	116.675	108.215	protein_coding_gene	Scaffold-327	102602	152951	-	5985	-	- && Q7KN62.1 RecName: Full=Transitional endoplasmic reticulum ATPase TER94; AltName: Full=Valosin-containing protein homolog && PF02347:Glycine cleavage system P-protein|PF00004:ATPase family associated with various cellular activities (AAA)|PF02359:Cell division protein 48 (CDC48), N-terminal domain|PF01212:Beta-eliminating lyase|PF02933:Cell division protein 48 (CDC48), domain 2	AAA
Scaffold-58.47	111.774	93.4842	88.9705	183.895	102.553	115.169	108.452	95.0661	79.9821	protein_coding_gene	Scaffold-58	1033675	1047992	+	970	-	- && Q6NW29.3 RecName: Full=RWD domain-containing protein 4; AltName: Full=Protein FAM28A && PF05773:RWD domain	RWD
Scaffold-76.56	104.283	103.073	91.9677	171.518	101.849	103.093	102.483	103.456	97.0033	protein_coding_gene	Scaffold-76	1263656	1279808	-	969	-	- && Q6P637.1 RecName: Full=COP9 signalosome complex subunit 8; Short=Signalosome subunit 8 && PF10075:CSN8/PSMD8/EIF3K family	-
Scaffold-130.25	99.8541	101.91	114.292	156.648	89.2627	108.182	117.681	93.2403	97.3665	protein_coding_gene	Scaffold-130	834195	861715	+	2018	-	- && Q28IU1.1 RecName: Full=Very-long-chain 3-oxoacyl-CoA reductase; AltName: Full=17-beta-hydroxysteroid dehydrogenase 12; Short=17-beta-HSD 12; AltName: Full=3-ketoacyl-CoA reductase; Short=KAR; AltName: Full=Estradiol 17-beta-dehydrogenase 12 && PF00106:short chain dehydrogenase	adh_short
Scaffold-13.193	108.22	97.3581	103.227	133.33	114.205	116.547	104.159	95.6899	104.948	protein_coding_gene	Scaffold-13	3151181	3168837	+	2977	-	- && P62494.3 RecName: Full=Ras-related protein Rab-11A; Short=Rab-11; AltName: Full=24KG; Flags: Precursor >P62490.3 RecName: Full=Ras-related protein Rab-11A; Short=Rab-11; Flags: Precursor >P62491.3 RecName: Full=Ras-related protein Rab-11A; Short=Rab-11; AltName: Full=YL8; Flags: Precursor >P62492.3 RecName: Full=Ras-related protein Rab-11A; Short=Rab-11; Flags: Precursor >P62493.3 RecName: F…	Ras
Scaffold-524.12	97.3228	89.8002	108.746	168.417	85.3824	97.961	136.651	108.669	83.9992	protein_coding_gene	Scaffold-524	249369	255675	-	1169	-	- && Q9VKB4.1 RecName: Full=Probable ribosome production factor 1; AltName: Full=Ribosome biogenesis protein RPF1 && PF04427:Brix domain	-
Scaffold-384.9	134.373	85.1734	84.6594	180.148	88.5785	89.2348	125.518	102.646	85.1595	protein_coding_gene	Scaffold-384	150046	159626	-	1013	-	- && Q5QJE6.2 RecName: Full=Deoxynucleotidyltransferase terminal-interacting protein 2; AltName: Full=Estrogen receptor-binding protein; AltName: Full=LPTS-interacting protein 2; Short=LPTS-RP2; AltName: Full=Terminal deoxynucleotidyltransferase-interacting factor 2; Short=TdIF2; Short=TdT-interacting factor 2 && PF08698:Fcf2 pre-rRNA processing	-
Scaffold-205.11	100.33	92.7577	101.059	150.104	107.086	127.343	96.7745	94.7796	104.188	protein_coding_gene	Scaffold-205	202762	212387	-	1634	-	- && Q9VXK0.2 RecName: Full=Protein NipSnap && PF07978:NIPSNAP	-
Scaffold-9.69	125.659	93.7255	94.5002	126.632	110.039	108.747	114.12	106.007	93.2888	protein_coding_gene	Scaffold-9	1071969	1089441	+	3614	-	- && Q32NQ8.1 RecName: Full=RING finger protein 10 && PF13920:Zinc finger, C3HC4 type (RING finger)	-
Scaffold-9.291	104.496	109.613	100.985	138.312	112.266	104.082	87.7993	112.294	102.274	protein_coding_gene	Scaffold-9	5237945	5252311	+	1380	-	- && P22464.2 RecName: Full=Annexin B9; AltName: Full=Annexin IX; AltName: Full=Annexin-9 && PF00191:Annexin	-
Scaffold-20.260	102.145	108.134	108.283	134.624	111.875	116.857	106.408	86.092	95.8043	protein_coding_gene	Scaffold-20	6627673	6635809	+	760	-	- && P12815.2 RecName: Full=Programmed cell death protein 6; AltName: Full=ALG-257; AltName: Full=PMP41; AltName: Full=Probable calcium-binding protein ALG-2 && PF13499:EF-hand domain pair	-
Scaffold-236.25	76.9576	110.496	50.9737	25.5497	174.979	189.703	104.568	79.1243	155.409	protein_coding_gene	Scaffold-236	436819	471657	+	1863	-	- && Q7M4F2.1 RecName: Full=Endocuticle structural glycoprotein SgAbd-8 && PF00379:Insect cuticle protein	Chitin_bind_4
Scaffold-92.29	107.61	81.6505	82.273	202.918	89.3631	105.962	112.81	91.667	85.7763	protein_coding_gene	Scaffold-92	560032	562745	+	791	-	- && Q9VVN2.1 RecName: Full=Probable 28S ribosomal protein S26, mitochondrial; Short=MRP-S26; Short=S26mt; Flags: Precursor && PF14943:Mitochondrial ribosome subunit S26	-
Scaffold-204.7	94.1385	103.691	98.7697	127.087	140.887	110.836	85.3923	92.7249	103.643	protein_coding_gene	Scaffold-204	98926	108505	-	1696	-	- && Q9V438.1 RecName: Full=Protein disulfide-isomerase A6 homolog; AltName: Full=Calcium-binding protein 1; Short=DmCaBP1; Flags: Precursor && PF00085:Thioredoxin	-
Scaffold-58.45	79.9315	102.325	118.452	115.269	84.6445	126.572	114.857	86.9291	120.481	protein_coding_gene	Scaffold-58	1012845	1022739	+	1874	-	- && P10123.4 RecName: Full=Retinaldehyde-binding protein 1; AltName: Full=Cellular retinaldehyde-binding protein && PF00650:CRAL/TRIO domain	-
Scaffold-162.28	101.444	86.3722	96.9895	161.929	94.8411	97.2977	120.576	96.3513	93.0326	protein_coding_gene	Scaffold-162	583974	615941	-	1793	-	- && Q9D6Z1.2 RecName: Full=Nucleolar protein 56; AltName: Full=Nucleolar protein 5A && PF08156:NOP5NT (NUC127) domain|PF01798:snoRNA binding domain, fibrillarin	-
Scaffold-260.2	91.9708	124.243	113.969	102.964	94.2453	120.831	104.233	89.0722	106.897	protein_coding_gene	Scaffold-260	51662	55027	+	857	-	- && - && PF11838:ERAP1-like C-terminal domain	-
Scaffold-225.24	119.76	101.986	93.7207	129.025	105.822	115.582	79.4448	95.9323	106.97	protein_coding_gene	Scaffold-225	488207	490645	+	2439	-	- && P41562.1 RecName: Full=Isocitrate dehydrogenase [NADP] cytoplasmic; Short=IDH; AltName: Full=Cytosolic NADP-isocitrate dehydrogenase; AltName: Full=IDP; AltName: Full=NADP(+)-specific ICDH; AltName: Full=Oxalosuccinate decarboxylase && PF00180:Isocitrate/isopropylmalate dehydrogenase	-
Scaffold-621.14	102.856	91.7615	87.586	215.083	84.3013	90.4414	115.387	77.0208	82.563	protein_coding_gene	Scaffold-621	159581	160663	+	1083	-	- && - && PF09814:HECT-like Ubiquitin-conjugating enzyme (E2)-binding	-
Scaffold-10.64	119.505	97.2528	114.866	113.049	98.4013	102.926	99.3131	106.387	94.8275	protein_coding_gene	Scaffold-10	1316567	1326132	+	954	-	- && Q5I0D7.1 RecName: Full=Xaa-Pro dipeptidase; Short=X-Pro dipeptidase; AltName: Full=Imidodipeptidase; AltName: Full=Peptidase D; AltName: Full=Proline dipeptidase; Short=Prolidase && PF00557:Metallopeptidase family M24	Peptidase_M24
Scaffold-293.23	87.5707	100.299	102.95	144.253	105.066	113.087	96.3525	93.1998	103.703	protein_coding_gene	Scaffold-293	410940	426332	+	934	-	- && Q9BUL8.1 RecName: Full=Programmed cell death protein 10; AltName: Full=Cerebral cavernous malformations 3 protein; AltName: Full=TF-1 cell apoptosis-related protein 15 && PF06840:Protein of unknown function (DUF1241)	-
Scaffold-140.18	85.6652	88.0195	90.5541	169.299	114.439	111.674	99.4086	100.159	86.7269	protein_coding_gene	Scaffold-140	434719	439883	+	1020	-	- && - && PF14978:Mitochondrial ribosome protein 63	-
Scaffold-73.82	106.962	104.071	110.895	146.761	103.642	103.301	93.3051	90.2376	85.6061	protein_coding_gene	Scaffold-73	1603124	1631382	-	4518	-	- && Q95333.1 RecName: Full=Xaa-Pro aminopeptidase 2; AltName: Full=Aminoacylproline aminopeptidase; AltName: Full=Membrane-bound aminopeptidase P; Short=Membrane-bound APP; Short=Membrane-bound AmP; Short=mAmP; AltName: Full=X-Pro aminopeptidase 2; Flags: Precursor && PF16188:C-terminal region of peptidase_M24|PF00557:Metallopeptidase family M24|PF00725:3-hydroxyacyl-CoA dehydrogenase, C-termina…	3HCDH_N
Scaffold-446.7	100.367	61.3348	77.433	186.52	103.937	113.612	116.057	97.838	86.1839	protein_coding_gene	Scaffold-446	142801	150599	+	1053	-	- && Q9VEB3.3 RecName: Full=Ribosome production factor 2 homolog; AltName: Full=Brix domain-containing protein 1 homolog; AltName: Full=Novel nucleolar protein 3; AltName: Full=Ribosome biogenesis protein RPF2 homolog && PF04427:Brix domain	-
Scaffold-70.44	69.8151	98.0779	121.77	128.646	99.0544	110.038	87.4729	125.917	102.311	protein_coding_gene	Scaffold-70	669592	685613	-	2842	-	- && B2D0J5.1 RecName: Full=Venom carboxylesterase-6; AltName: Allergen=Api m 8; Flags: Precursor && PF00135:Carboxylesterase family	COesterase
Scaffold-15099.70	104.218	100.266	99.8399	135.173	105.922	113.986	101.146	98.1045	83.5779	protein_coding_gene	Scaffold-15099	876815	901704	-	2424	-	- && Q60HF9.1 RecName: Full=Fumarate hydratase, mitochondrial; Short=Fumarase; Flags: Precursor && PF00206:Lyase|PF10415:Fumarase C C-terminus	-
Scaffold-14.117	103.991	103.122	95.7973	115.287	86.8938	111.482	113.259	116.815	94.1773	protein_coding_gene	Scaffold-14	2397248	2407834	-	1908	-	- && Q15397.3 RecName: Full=Pumilio homolog 3; AltName: Full=HBV X-transactivated gene 5 protein; AltName: Full=HBV XAg-transactivated protein 5; AltName: Full=Minor histocompatibility antigen HA-8; Short=HLA-HA8 && PF08144:CPL (NUC119) domain	-
Scaffold-15.44	94.9119	121.127	114.341	39.5341	115.613	106.278	91.9286	111.378	143.976	protein_coding_gene	Scaffold-15	846786	887915	-	1716	-	- && P92177.2 RecName: Full=14-3-3 protein epsilon; AltName: Full=Suppressor of Ras1 3-9 && PF00244:14-3-3 protein|PF11029:DAZ associated protein 2 (DAZAP2)	-
Scaffold-218.34	161.122	93.8027	93.7048	68.588	79.6052	120.558	108.483	111.191	101.388	protein_coding_gene	Scaffold-218	657328	673223	+	1441	-	- && P55274.1 RecName: Full=Arrestin homolog && PF02752:Arrestin (or S-antigen), C-terminal domain|PF00339:Arrestin (or S-antigen), N-terminal domain	-
Scaffold-13.119	121.358	92.4176	97.0688	89.5962	126.57	118.622	87.4795	96.9157	106.095	protein_coding_gene	Scaffold-13	1980742	2004166	+	1825	-	- && Q6UXP7.2 RecName: Full=Protein FAM151B && PF10223:Uncharacterized conserved protein (DUF2181)	-
Scaffold-67.10	118.371	82.2165	37.387	67.967	124.38	231.434	84.8189	82.3644	106.091	protein_coding_gene	Scaffold-67	135993	142008	-	698	-	- && - && -	-
Scaffold-129.30	198.866	81.048	91.2143	289.893	40.8759	27.5452	102.017	70.8202	32.4963	protein_coding_gene	Scaffold-129	475546	491551	-	2176	-	- && - && -	-
Scaffold-747.1	98.5335	86.0924	110.393	28.8659	134.382	114.925	82.3913	155.053	123.581	protein_coding_gene	Scaffold-747	2126	67920	+	4925	-	- && P05661.4 RecName: Full=Myosin heavy chain, muscle && PF00063:Myosin head (motor domain)|PF01576:Myosin tail	Myosin_head
Scaffold-9.329	105.599	105.106	114.903	70.1223	103.284	110.611	99.9716	117.572	105.621	protein_coding_gene	Scaffold-9	5959580	5972423	-	1423	-	- && O62829.1 RecName: Full=Protein phosphatase 1A; AltName: Full=Protein phosphatase 2C isoform alpha; Short=PP2C-alpha && PF00481:Protein phosphatase 2C|PF07830:Protein serine/threonine phosphatase 2C, C-terminal domain	PP2C
Scaffold-546.8	109.224	97.3148	89.6927	129.291	104.424	118.044	95.1391	95.3645	93.7089	protein_coding_gene	Scaffold-546	188472	219858	+	5219	-	- && Q9V498.2 RecName: Full=Calsyntenin-1; AltName: Full=Cadherin-102F; Flags: Precursor && PF13385:Concanavalin A-like lectin/glucanases superfamily|PF00028:Cadherin domain	Cadherin
Scaffold-107.12	98.4365	79.5938	80.6489	184.456	91.6689	123.685	96.875	85.9726	90.0011	protein_coding_gene	Scaffold-107	249026	252079	-	721	-	- && B5G2S6.1 RecName: Full=Protein kish-A; AltName: Full=Transmembrane protein 167A; Flags: Precursor && PF06842:Protein of unknown function (DUF1242)	-
Scaffold-39.78	95.5066	92.4512	86.1395	180.347	97.0442	109.917	93.0011	89.7463	83.0971	protein_coding_gene	Scaffold-39	1768297	1772598	+	890	-	- && Q291A0.1 RecName: Full=39S ribosomal protein L41, mitochondrial; Short=L41mt; Short=MRP-L41; Flags: Precursor && PF09809:Mitochondrial ribosomal protein L27	-
Scaffold-223.25	920.323	0.162565	0	2.05706	1.0929	1.38664	0.30904	0.155541	0.620668	protein_coding_gene	Scaffold-223	433036	441567	+	615	-	- && P51909.1 RecName: Full=Apolipoprotein D; Short=Apo-D; Short=ApoD; Flags: Precursor && PF08212:Lipocalin-like domain	Lipocalin_2
Scaffold-1.149	110.269	87.8489	98.4306	158.536	79.6521	97.3992	111.842	87.8407	91.3276	protein_coding_gene	Scaffold-1	2667647	2707076	+	1187	-	- && Q172Y1.1 RecName: Full=Mediator of RNA polymerase II transcription subunit 30; AltName: Full=Mediator complex subunit 30 && PF11315:Mediator complex subunit 30	-
Scaffold-198.20	100.726	108.024	109.861	77.7655	112.874	99.1283	103.521	108.267	101.717	protein_coding_gene	Scaffold-198	360847	392532	-	1578	-	- && Q7SZ10.1 RecName: Full=Serine/threonine-protein phosphatase PP1-gamma catalytic subunit B; Short=PP-1G-B; AltName: Full=Protein phosphatase 1 zeta; Short=xPP1-zeta && PF16891:Serine-threonine protein phosphatase N-terminal domain|PF00149:Calcineurin-like phosphoesterase	Metallophos
Scaffold-583.2	121.135	105.662	78.345	188.812	101.282	88.2797	83.1643	80.0881	70.6399	protein_coding_gene	Scaffold-583	47409	50135	-	897	-	- && P33316.4 RecName: Full=Deoxyuridine 5'-triphosphate nucleotidohydrolase, mitochondrial; Short=dUTPase; AltName: Full=dUTP pyrophosphatase; Flags: Precursor && PF00692:dUTPase	-
Scaffold-2.130	107.183	74.885	82.8295	153.036	93.0549	105.782	88.3697	103.647	108.508	protein_coding_gene	Scaffold-2	2491153	2507447	-	4837	-	- && - && -	-
Scaffold-81.46	108.301	84.398	89.7607	143.204	95.6064	100.327	112.192	95.8799	87.2784	protein_coding_gene	Scaffold-81	1261411	1285143	+	3876	-	- && Q9EPL8.2 RecName: Full=Importin-7; Short=Imp7; AltName: Full=Ran-binding protein 7; Short=RanBP7 && PF03810:Importin-beta N-terminal domain|PF03378:CAS/CSE protein, C-terminus	-
Scaffold-95.81	105.907	74.3196	83.0487	249.1	42.2976	93.0765	80.7333	101.583	83.8863	protein_coding_gene	Scaffold-95	1449197	1452333	+	339	-	- && - && -	-
Scaffold-44.53	93.4979	86.9106	93.8835	174.839	93.04	101.552	98.7848	96.0939	75.0514	protein_coding_gene	Scaffold-44	886399	891813	-	1316	-	- && - && -	-
Scaffold-519.13	114.31	99.0163	170.522	31.9314	91.7962	88.506	121.732	84.2115	110.211	protein_coding_gene	Scaffold-519	183281	205765	+	936	-	- && Q5R4G5.1 RecName: Full=ADP-ribosylation factor-like protein 6 && PF00887:Acyl CoA binding protein|PF00025:ADP-ribosylation factor family	Arf
Scaffold-2432.1	467.559	0	0	12.0737	0.208608	0	176.787	0	254.296	protein_coding_gene	Scaffold-2432	2399	9542	+	537	-	- && - && -	-
Scaffold-534.17	111.471	82.2343	89.3805	150.972	96.6578	105.572	101.428	91.7217	79.8007	protein_coding_gene	Scaffold-534	233564	258008	-	2406	-	- && Q99JI4.1 RecName: Full=26S proteasome non-ATPase regulatory subunit 6; AltName: Full=26S proteasome regulatory subunit RPN7; AltName: Full=26S proteasome regulatory subunit S10; AltName: Full=p42A && PF10602:26S proteasome subunit RPN7|PF01399:PCI domain	-
Scaffold-58.164	94.7125	39.9543	52.6684	214.182	74.2149	96.9233	122.246	102.269	106.093	protein_coding_gene	Scaffold-58	2745017	2763256	-	2720	-	- && A1XD95.1 RecName: Full=Tuftelin-interacting protein 11; AltName: Full=Septin and tuftelin-interacting protein 1; Short=STIP-1 && PF01585:G-patch domain|PF07842:GC-rich sequence DNA-binding factor-like protein|PF12457:Tuftelin interacting protein N terminal	G-patch
Scaffold-98.59	96.8243	90.271	100.924	145.172	87.7328	107.107	106.716	82.1398	86.3687	protein_coding_gene	Scaffold-98	1493319	1510883	-	927	-	- && P0C0A3.2 RecName: Full=Charged multivesicular body protein 6; AltName: Full=Chromatin-modifying protein 6 && PF03357:Snf7	ESCRT-III
Scaffold-434.9	92.2275	83.5277	90.5587	165.012	91.8718	104.482	101.754	98.4305	74.4384	protein_coding_gene	Scaffold-434	122896	129224	+	1173	-	- && P23381.2 RecName: Full=Tryptophan--tRNA ligase, cytoplasmic; AltName: Full=Interferon-induced protein 53; Short=IFP53; AltName: Full=Tryptophanyl-tRNA synthetase; Short=TrpRS; Short=hWRS; Contains: RecName: Full=T1-TrpRS; Contains: RecName: Full=T2-TrpRS && PF00579:tRNA synthetases class I (W and Y)	-
Scaffold-1662.1	126.15	99.9048	20.0173	23.4788	296.77	139.382	26.2127	26.1771	143.836	protein_coding_gene	Scaffold-1662	108	2616	+	1374	-	- && P10987.4 RecName: Full=Actin-5C; Flags: Precursor >P84184.1 RecName: Full=Actin-A3b, cytoplasmic; Flags: Precursor >P84185.1 RecName: Full=Actin-5C; AltName: Full=Actin-1D, cytoplasmic; Flags: Precursor >P84183.1 RecName: Full=Actin, cytoplasmic A4; Flags: Precursor && PF00022:Actin	Actin
Scaffold-24.156	109.459	101.862	111.252	138.014	100.359	86.0716	78.1736	100.658	74.0034	protein_coding_gene	Scaffold-24	4073809	4099933	+	2334	-	- && Q8VCC9.1 RecName: Full=Spondin-1; AltName: Full=F-spondin; Flags: Precursor && PF00014:Kunitz/Bovine pancreatic trypsin inhibitor domain|PF02014:Reeler domain|PF06468:Spondin_N|PF00090:Thrombospondin type 1 domain	Kunitz_BPTI
Scaffold-166.22	128.555	101.965	112.184	30.9397	88.5047	112.367	102.939	106.055	114.632	protein_coding_gene	Scaffold-166	386884	397518	-	1610	-	- && P32122.1 RecName: Full=Arrestin homolog [Locusta migratoria] && PF00339:Arrestin (or S-antigen), N-terminal domain|PF02752:Arrestin (or S-antigen), C-terminal domain	-
Scaffold-1720.1	105.533	88.0417	92.5395	134.771	97.3245	108.29	85.8189	84.3507	100.165	protein_coding_gene	Scaffold-1720	326	5502	-	846	-	- && Q6GLV4.1 RecName: Full=UBX domain-containing protein 1-B; AltName: Full=SAPK substrate protein 1-B && PF00789:UBX domain	UBX
Scaffold-392.7	93.6464	92.1362	93.882	135.353	95.3098	93.9919	105.481	89.8677	95.8344	protein_coding_gene	Scaffold-392	26842	36324	-	1173	-	- && A1Z3X3.1 RecName: Full=Golgi to ER traffic protein 4 homolog; AltName: Full=Conserved edge expressed protein && PF04190:Protein of unknown function (DUF410)	-
Scaffold-1289.2	113.793	75.2125	88.0832	161.763	75.0242	103.757	124.672	88.0519	64.6398	protein_coding_gene	Scaffold-1289	2940	5932	-	654	-	- && Q8K2C8.1 RecName: Full=Glycerol-3-phosphate acyltransferase 4; Short=GPAT4; AltName: Full=1-acylglycerol-3-phosphate O-acyltransferase 6; Short=1-AGP acyltransferase 6; Short=1-AGPAT 6; AltName: Full=Acyl-CoA:glycerol-3-phosphate acyltransferase 4; AltName: Full=Lysophosphatidic acid acyltransferase zeta; Short=LPAAT-zeta; Flags: Precursor && -	-
Scaffold-274.12	79.9381	99.1157	79.8119	137.233	134.234	124.101	68.6781	85.0749	82.9508	protein_coding_gene	Scaffold-274	130835	135443	+	696	-	- && Q6P7K5.1 RecName: Full=ER membrane protein complex subunit 10; Flags: Precursor && -	-
Scaffold-13.55	84.6321	106.326	106.835	69.8718	90.906	117.999	109.195	99.5582	105.761	protein_coding_gene	Scaffold-13	753920	768282	-	1496	-	- && Q7ZVP8.1 RecName: Full=Trimeric intracellular cation channel type B; Short=TRIC-B; Short=TRICB; AltName: Full=Transmembrane protein 38B && PF05197:TRIC channel	-
Scaffold-48.16	95.6661	96.7382	107.964	130.282	87.7372	95.2718	88.2	97.9119	89.7217	protein_coding_gene	Scaffold-48	205456	241480	+	3395	-	- && A5LGM7.1 RecName: Full=Facilitated trehalose transporter Tret1; Short=PvTret1 && PF00083:Sugar (and other) transporter	Sugar_tr
Scaffold-92.26	90.445	86.7211	93.0975	133.482	86.5103	99.9932	104.217	96.4619	98.4907	protein_coding_gene	Scaffold-92	523078	537687	-	2617	-	- && P46087.2 RecName: Full=Probable 28S rRNA (cytosine(4447)-C(5))-methyltransferase; AltName: Full=Nucleolar protein 1; AltName: Full=Nucleolar protein 2 homolog; AltName: Full=Proliferating-cell nucleolar antigen p120; AltName: Full=Proliferation-associated nucleolar protein p120 && PF01189:16S rRNA methyltransferase RsmF|PF17125:N-terminal domain of 16S rRNA methyltransferase RsmF	-
Scaffold-353.17	94.4618	99.6014	92.5577	125.057	103.088	95.9758	93.2422	92.8507	91.4784	protein_coding_gene	Scaffold-353	317238	326600	-	1329	-	- && Q9VL00.1 RecName: Full=Ubiquitin thioesterase otubain-like; AltName: Full=Ubiquitin-specific-processing protease otubain-like; Short=Deubiquitinating enzyme otubain-like && PF10275:Peptidase C65 Otubain	-
Scaffold-96.57	86.7193	83.5454	79.1874	190.114	92.5763	105.965	92.4851	83.822	72.7823	protein_coding_gene	Scaffold-96	1603116	1619190	+	1083	-	- && - && -	-
Scaffold-44.82	92.7956	83.8678	88.1167	142.131	80.4566	98.3486	108.726	102.784	88.8598	protein_coding_gene	Scaffold-44	1384291	1394019	+	1235	-	- && Q9VUJ0.2 RecName: Full=39S ribosomal protein L39, mitochondrial; Short=MRP-L39; AltName: Full=MRP-L5 && PF02824:TGS domain	-
Scaffold-577.11	185.069	0	0	527.963	41.3133	0	0.842463	0	129.775	protein_coding_gene	Scaffold-577	198224	205340	+	1128	-	- && Q05B21.1 RecName: Full=Vesicular glutamate transporter 1; Short=VGluT1; AltName: Full=Solute carrier family 17 member 7 && -	-
Scaffold-212.50	87.9795	98.7753	95.962	126.246	105.494	97.1452	98.0187	80.526	93.1324	protein_coding_gene	Scaffold-212	644484	645564	-	1081	-	- && Q811I0.1 RecName: Full=ATP synthase mitochondrial F1 complex assembly factor 1; Flags: Precursor && PF06644:ATP11 protein	ATP11
Scaffold-490.23	95.9608	92.2298	79.8191	117.548	95.0767	123.11	99.8608	98.3265	80.6964	protein_coding_gene	Scaffold-490	359569	374169	+	1613	-	- && Q9DE27.1 RecName: Full=RuvB-like 2; AltName: Full=Reptin && PF06068:TIP49 C-terminus	-
Scaffold-72.238	96.6322	86.4991	81.4393	164.15	83.0349	91.8658	125.721	85.3126	67.6712	protein_coding_gene	Scaffold-72	3855246	3867170	+	2025	-	- && Q8VEE0.1 RecName: Full=Ribulose-phosphate 3-epimerase; AltName: Full=Ribulose-5-phosphate-epimerase && PF00834:Ribulose-phosphate 3 epimerase family	-
Scaffold-145.26	94.0265	87.9768	90.9367	134.668	90.2634	96.7801	99.634	102.004	85.8057	protein_coding_gene	Scaffold-145	464368	483857	-	2291	-	- && Q8NCE2.2 RecName: Full=Myotubularin-related protein 14; AltName: Full=HCV NS5A-transactivated protein 4 splice variant A-binding protein 1; Short=NS5ATP4ABP1; AltName: Full=hJumpy && -	-
Scaffold-415.7	88.805	83.7301	100.584	116.668	116.16	93.1412	100.207	102.901	79.8314	protein_coding_gene	Scaffold-415	62259	67266	+	1083	-	- && O43674.1 RecName: Full=NADH dehydrogenase [ubiquinone] 1 beta subcomplex subunit 5, mitochondrial; AltName: Full=Complex I-SGDH; Short=CI-SGDH; AltName: Full=NADH-ubiquinone oxidoreductase SGDH subunit; Flags: Precursor >Q0MQD7.1 RecName: Full=NADH dehydrogenase [ubiquinone] 1 beta subcomplex subunit 5, mitochondrial; AltName: Full=Complex I-SGDH; Short=CI-SGDH; AltName: Full=NADH-ubiquinone…	-
Scaffold-368.15	85.5268	57.7808	59.7243	339.785	62.5929	81.8016	81.8122	58.9545	54.007	protein_coding_gene	Scaffold-368	198797	202724	+	417	-	- && Q9VXX8.1 RecName: Full=Probable 60S ribosomal protein L37-A && -	-
Scaffold-3.59	75.1836	80.8038	115.057	152.649	75.3466	83.9987	124.363	107.32	67.0608	protein_coding_gene	Scaffold-3	1079865	1092157	+	2190	-	- && Q9VKJ0.3 RecName: Full=Homogentisate 1,2-dioxygenase; AltName: Full=Homogentisate oxygenase; AltName: Full=Homogentisic acid oxidase; AltName: Full=Homogentisicase && PF04209:homogentisate 1,2-dioxygenase	-
Scaffold-377.23	117.338	80.4365	99.6342	132.568	105.33	97.3026	95.5852	93.111	59.1775	protein_coding_gene	Scaffold-377	315241	332093	+	1540	-	- && Q5R8I8.1 RecName: Full=Phosphatidylserine decarboxylase proenzyme, mitochondrial; Contains: RecName: Full=Phosphatidylserine decarboxylase beta chain; Contains: RecName: Full=Phosphatidylserine decarboxylase alpha chain; Flags: Precursor && PF02666:Phosphatidylserine decarboxylase	-
Scaffold-12.195	91.2179	75.2976	78.1475	140.731	107.619	122.401	99.5123	83.0237	82.2238	protein_coding_gene	Scaffold-12	4419457	4422395	-	636	-	- && - && PF11705:DNA-directed RNA polymerase III subunit Rpc31	-
Scaffold-16.95	88.5519	117.757	114.134	49.7557	95.7785	88.9946	103.61	107.173	113.247	protein_coding_gene	Scaffold-16	2052971	2076436	-	1462	-	- && P13706.3 RecName: Full=Glycerol-3-phosphate dehydrogenase [NAD(+)], cytoplasmic; Short=GPD-C; Short=GPDH-C && PF07479:NAD-dependent glycerol-3-phosphate dehydrogenase C-terminus|PF01210:NAD-dependent glycerol-3-phosphate dehydrogenase N-terminus	NAD_Gly3P_dh_N
Scaffold-32.164	86.6071	70.6341	68.4429	206.042	88.068	112.376	85.6663	75.3029	85.7248	protein_coding_gene	Scaffold-32	2078308	2081069	-	954	-	- && - && -	-
Scaffold-57.95	100.24	86.0636	85.1733	105.012	100.442	116.37	96.5169	92.234	96.6509	protein_coding_gene	Scaffold-57	2347302	2385329	+	6007	-	- && P13607.3 RecName: Full=Sodium/potassium-transporting ATPase subunit alpha; Short=Na(+)/K(+) ATPase alpha subunit; AltName: Full=Sodium pump subunit alpha && PF13246:Cation transport ATPase (P-type)|PF00689:Cation transporting ATPase, C-terminus|PF00122:E1-E2 ATPase|PF00690:Cation transporter/ATPase, N-terminus	E1-E2_ATPase
Scaffold-3.104	89.8288	92.2486	80.0644	151.827	100.709	111.345	81.4033	87.7857	82.4581	protein_coding_gene	Scaffold-3	2049882	2051707	-	802	-	- && - && -	-
Scaffold-34.76	85.0992	91.4663	82.4455	162.687	97.3817	101.668	101.411	76.3886	78.2644	protein_coding_gene	Scaffold-34	1131603	1140098	-	834	-	- && Q9VIZ0.1 RecName: Full=Probable DNA-directed RNA polymerases I and III subunit RPAC2; Short=RNA polymerases I and III subunit AC2; AltName: Full=AC19; AltName: Full=DNA-directed RNA polymerase I subunit D && PF13656:RNA polymerase Rpb3/Rpb11 dimerisation domain	-
Scaffold-298.16	387.903	0.198631	0	24.087	0.0741871	0	74.8281	0	389.61	protein_coding_gene	Scaffold-298	216422	233084	+	1510	-	- && - && -	-
Scaffold-4642.1	51.9665	93.7913	85.3726	89.3266	122.979	99.4547	85.1664	132.126	114.856	protein_coding_gene	Scaffold-4642	607	1885	-	501	-	- && - && PF00379:Insect cuticle protein	Chitin_bind_4
Scaffold-615.12	98.8567	86.3443	76.5796	178.009	73.6832	103.91	89.821	79.8001	84.456	protein_coding_gene	Scaffold-615	130385	162405	-	748	-	- && Q6PDW6.1 RecName: Full=39S ribosomal protein L17, mitochondrial; Short=L17mt; Short=MRP-L17; Flags: Precursor && PF01196:Ribosomal protein L17	-
Scaffold-1152.1	96.1049	62.1149	57.6295	178.158	85.0367	102.238	110.256	97.319	82.2763	protein_coding_gene	Scaffold-1152	64	19618	+	1785	-	- && Q17Q06.1 RecName: Full=Eukaryotic translation initiation factor 3 subunit C; Short=eIF3c; AltName: Full=Eukaryotic translation initiation factor 3 subunit 8 && PF05470:Eukaryotic translation initiation factor 3 subunit 8 N-terminus	-
Scaffold-236.7	36.2786	156.538	73.9678	22.2727	137.267	156.143	76.2915	110.703	95.6517	protein_coding_gene	Scaffold-236	180647	187608	+	426	-	- && Q7M4F3.1 RecName: Full=Endocuticle structural glycoprotein SgAbd-2 && PF00379:Insect cuticle protein	Chitin_bind_4
Scaffold-77.64	104.243	92.097	89.2064	108.162	89.8459	99.4344	96.6177	95.1713	89.2229	protein_coding_gene	Scaffold-77	1036297	1056805	-	2753	-	- && Q920L2.1 RecName: Full=Succinate dehydrogenase [ubiquinone] flavoprotein subunit, mitochondrial; AltName: Full=Flavoprotein subunit of complex II; Short=Fp; Flags: Precursor && PF00890:FAD binding domain|PF02910:Fumarate reductase flavoprotein C-term	-
Scaffold-105.51	62.3399	110.77	81.1082	81.6244	94.8355	144.723	75.3469	91.4645	121.258	protein_coding_gene	Scaffold-105	918619	936480	-	1825	-	- && - && PF01607:Chitin binding Peritrophin-A domain	CBM_14
Scaffold-71.69	100.929	97.1918	89.0623	141.654	90.1729	75.7693	90.8782	103.391	73.565	protein_coding_gene	Scaffold-71	1251056	1271974	-	2907	-	- && Q2HZX7.1 RecName: Full=Protein fuzzy homolog; AltName: Full=Xfy && PF00079:Serpin (serine protease inhibitor)	Serpin
Scaffold-2.80	81.5271	79.1107	88.0004	128.879	95.9214	109.532	104.62	92.7325	79.9608	protein_coding_gene	Scaffold-2	1209834	1219041	-	1308	-	- && P32234.2 RecName: Full=GTP-binding protein 128up && PF02824:TGS domain|PF01926:50S ribosome-binding GTPase|PF16897:C-terminal region of MMR_HSR1 domain	-
Scaffold-137.16	102.204	87.4125	105.57	78.7051	106.597	102.751	80.2298	93.0616	96.4238	protein_coding_gene	Scaffold-137	177780	194485	-	2395	-	- && - && PF01299:Lysosome-associated membrane glycoprotein (Lamp)	-
Scaffold-69.44	90.577	86.4885	80.9542	121.74	82.0906	101.651	102.572	93.8357	93.0041	protein_coding_gene	Scaffold-69	890277	909180	-	1890	-	- && Q5XGB9.1 RecName: Full=Cytosol aminopeptidase; AltName: Full=Leucine aminopeptidase 3; Short=LAP-3; AltName: Full=Leucyl aminopeptidase; AltName: Full=Proline aminopeptidase; AltName: Full=Prolyl aminopeptidase && PF02789:Cytosol aminopeptidase family, N-terminal domain|PF00883:Cytosol aminopeptidase family, catalytic domain	-
Scaffold-30.28	76.4345	94.8352	78.8806	50.5999	106.06	127.801	102.021	92.1106	121.282	protein_coding_gene	Scaffold-30	608542	632178	-	1672	-	- && - && PF03417:Acyl-coenzyme A:6-aminopenicillanic acid acyl-transferase	-
Scaffold-636.11	103.498	101.686	93.9553	92.2606	90.3998	86.2657	90.8846	99.4131	90.606	protein_coding_gene	Scaffold-636	128011	151522	-	2751	-	- && P00637.4 RecName: Full=Fructose-1,6-bisphosphatase 1; Short=FBPase 1; AltName: Full=D-fructose-1,6-bisphosphate 1-phosphohydrolase 1; AltName: Full=Liver FBPase && PF01061:ABC-2 type transporter|PF00005:ABC transporter|PF00316:Fructose-1-6-bisphosphatase|PF07673:Protein of unknown function (DUF1602)	ABC2_membrane
Scaffold-1.34	96.2999	83.955	91.6384	96.1249	90.792	96.2372	101.628	97.078	94.7192	protein_coding_gene	Scaffold-1	718339	723907	-	2290	-	- && P54646.2 RecName: Full=5'-AMP-activated protein kinase catalytic subunit alpha-2; Short=AMPK subunit alpha-2; AltName: Full=Acetyl-CoA carboxylase kinase; Short=ACACA kinase; AltName: Full=Hydroxymethylglutaryl-CoA reductase kinase; Short=HMGCR kinase && PF00069:Protein kinase domain|PF16579:Adenylate sensor of SNF1-like protein kinase	Pkinase
Scaffold-703.4	69.4004	48.6076	51.0539	71.4914	552.868	10.3133	23.4083	16.0273	3.14165	protein_coding_gene	Scaffold-703	34697	49052	-	1701	-	- && - && PF00078:Reverse transcriptase (RNA-dependent DNA polymerase)	RVT_1
Scaffold-70.67	83.3291	79.3861	84.784	111.056	93.7147	97.2649	99.0079	93.4153	103.385	protein_coding_gene	Scaffold-70	1436904	1459838	-	2986	-	- && O44081.1 RecName: Full=H/ACA ribonucleoprotein complex subunit 4; AltName: Full=Nucleolar protein AT band 60B; AltName: Full=Protein minifly && PF16198:tRNA pseudouridylate synthase B C-terminal domain|PF01472:PUA domain|PF08068:DKCLD (NUC011) domain|PF01509:TruB family pseudouridylate synthase (N terminal domain)	-
Scaffold-31.154	107.169	80.1343	84.4719	136.008	92.4545	94.5151	82.727	79.95	86.2528	protein_coding_gene	Scaffold-31	2964326	2982583	-	2101	-	- && Q27245.1 RecName: Full=Putative aminopeptidase W07G4.4 && PF00883:Cytosol aminopeptidase family, catalytic domain	-
Scaffold-7.127	100.932	88.9073	88.5384	118.159	97.5243	94.6367	97.2709	77.17	80.2229	protein_coding_gene	Scaffold-7	3247120	3266722	-	3477	-	- && O62742.1 RecName: Full=Non-specific lipid-transfer protein; Short=NSL-TP; AltName: Full=Propanoyl-CoA C-acyltransferase; AltName: Full=SCP-chi; AltName: Full=SCPX; AltName: Full=Sterol carrier protein 2; Short=SCP-2; AltName: Full=Sterol carrier protein X; Short=SCP-X && PF02036:SCP-2 sterol transfer family|PF02803:Thiolase, C-terminal domain|PF00108:Thiolase, N-terminal domain	Thiolase_N
Scaffold-78.23	87.1266	92.0013	119.964	98.018	112.999	96.3275	73.9735	65.7802	94.4721	protein_coding_gene	Scaffold-78	486934	492565	+	3096	-	- && - && -	-
Scaffold-15.84	87.2918	93.0547	79.7753	117.115	99.2255	102.599	92.0236	76.0555	92.7107	protein_coding_gene	Scaffold-15	1633735	1646431	-	2845	-	- && P68036.1 RecName: Full=Ubiquitin-conjugating enzyme E2 L3; AltName: Full=E2 ubiquitin-conjugating enzyme L3; AltName: Full=L-UBC; AltName: Full=UbcH7; AltName: Full=Ubiquitin carrier protein L3; AltName: Full=Ubiquitin-conjugating enzyme E2-F1; AltName: Full=Ubiquitin-protein ligase L3 >P68037.1 RecName: Full=Ubiquitin-conjugating enzyme E2 L3; AltName: Full=E2 ubiquitin-conjugating enzyme L…	UQ_con
Scaffold-153.34	76.3375	72.7853	65.4347	182.067	88.7704	94.9196	86.3819	81.2798	88.012	protein_coding_gene	Scaffold-153	870104	881660	-	978	-	- && Q9VF89.1 RecName: Full=39S ribosomal protein L9, mitochondrial; Short=L9mt; Short=MRP-L9; Flags: Precursor && PF01281:Ribosomal protein L9, N-terminal domain	-
Scaffold-222.18	91.7219	89.6803	104.565	70.8751	105.939	110.343	89.1572	100.554	72.8514	protein_coding_gene	Scaffold-222	482253	492347	+	1602	-	- && P25708.2 RecName: Full=NADH dehydrogenase [ubiquinone] flavoprotein 1, mitochondrial; AltName: Full=Complex I-51kD; Short=CI-51kD; AltName: Full=NADH dehydrogenase flavoprotein 1; AltName: Full=NADH-ubiquinone oxidoreductase 51 kDa subunit; Flags: Precursor && PF10531:SLBB domain|PF01512:Respiratory-chain NADH dehydrogenase 51 Kd subunit|PF10589:NADH-ubiquinone oxidoreductase-F iron-sulfur b…	-
Scaffold-114.29	75.6524	71.0416	59.666	181.021	80.4317	100.354	103.14	78.6204	84.4508	protein_coding_gene	Scaffold-114	417248	424615	+	539	-	- && Q9D0B6.1 RecName: Full=Protein PBDC1; AltName: Full=Polysaccharide biosynthesis domain-containing protein 1 && PF04669:Polysaccharide biosynthesis	-
Scaffold-24.348	97.7315	99.3642	94.7474	95.1972	92.5216	87.6325	105.743	90.8162	70.6194	protein_coding_gene	Scaffold-24	8662072	8679263	-	1304	-	- && Q6GM44.1 RecName: Full=E3 ubiquitin-protein ligase MARCH5; AltName: Full=Membrane-associated RING finger protein 5; AltName: Full=Membrane-associated RING-CH protein V; Short=MARCH-V && PF12906:RING-variant domain	-
Scaffold-290.126	118.882	94.7981	88.2113	84.9307	84.4428	80.1365	96.5203	102.614	83.0003	protein_coding_gene	Scaffold-290	1151402	1168539	+	2104	-	- && P30419.2 RecName: Full=Glycylpeptide N-tetradecanoyltransferase 1; AltName: Full=Myristoyl-CoA:protein N-myristoyltransferase 1; Short=NMT 1; Short=Type I N-myristoyltransferase; AltName: Full=Peptide N-myristoyltransferase 1 && PF02799:Myristoyl-CoA:protein N-myristoyltransferase, C-terminal domain|PF01233:Myristoyl-CoA:protein N-myristoyltransferase, N-terminal domain	-
Scaffold-182.22	79.5948	87.0138	101.945	118.403	99.4751	91.4002	76.8581	92.1345	84.5945	protein_coding_gene	Scaffold-182	590608	605703	+	1982	-	- && Q96KP4.2 RecName: Full=Cytosolic non-specific dipeptidase; AltName: Full=CNDP dipeptidase 2; AltName: Full=Carnosine dipeptidase II; AltName: Full=Epididymis secretory protein Li 13; AltName: Full=Glutamate carboxypeptidase-like protein 1; AltName: Full=Peptidase A && PF01546:Peptidase family M20/M25/M40|PF07687:Peptidase dimerisation domain	Peptidase_M20
Scaffold-210.2	76.3021	84.7397	80.4098	157.869	94.2848	89.1259	84.3279	77.4334	85.1657	protein_coding_gene	Scaffold-210	28269	31406	+	1181	-	- && - && PF04935:Surfeit locus protein 6	-
Scaffold-102.62	120.999	89.432	79.3579	82.3176	97.1373	101.466	82.2724	114.527	61.5704	protein_coding_gene	Scaffold-102	1284607	1296180	-	730	-	- && - && -	-
Scaffold-50.11	65.8413	98.0682	105.573	119.501	88.2311	102.652	64.5214	99.8784	82.859	protein_coding_gene	Scaffold-50	164363	171250	-	3037	-	- && - && PF03193:Protein of unknown function, DUF258	-
Scaffold-19.126	75.0652	93.0041	99.0604	78.1394	87.1834	105.994	93.146	88.0023	107.058	protein_coding_gene	Scaffold-19	2717831	2730041	-	1362	-	- && - && PF00650:CRAL/TRIO domain	-
Scaffold-230.31	99.4571	77.3519	112.087	99.0937	104.426	82.3121	88.0423	91.2031	71.9606	protein_coding_gene	Scaffold-230	418858	427181	-	1224	-	- && A5A6H9.1 RecName: Full=2-oxoisovalerate dehydrogenase subunit alpha, mitochondrial; AltName: Full=Branched-chain alpha-keto acid dehydrogenase E1 component alpha chain; Short=BCKDE1A; Short=BCKDH E1-alpha; Flags: Precursor && PF00676:Dehydrogenase E1 component	-
Scaffold-405.31	92.1872	84.4122	0.9726	0.710194	291.711	209.548	17.0001	7.30321	121.856	protein_coding_gene	Scaffold-405	380433	387560	-	1336	-	- && - && -	-
Scaffold-147.39	224.017	46.6489	110.906	9.5207	263.236	94.7237	25.5366	43.9309	7.0765	protein_coding_gene	Scaffold-147	773596	785396	+	2724	-	- && - && -	-
Scaffold-46.31	103.161	87.9584	84.0227	117.349	85.8227	88.5402	100.015	75.2717	82.8083	protein_coding_gene	Scaffold-46	778935	784369	-	915	-	- && Q99828.4 RecName: Full=Calcium and integrin-binding protein 1; Short=CIB; AltName: Full=Calcium- and integrin-binding protein; Short=CIBP; AltName: Full=Calmyrin; AltName: Full=DNA-PKcs-interacting protein; AltName: Full=Kinase-interacting protein; Short=KIP; AltName: Full=SNK-interacting protein 2-28; Short=SIP2-28 && PF13499:EF-hand domain pair	-
Scaffold-207.15	94.0817	87.79	92.461	86.9483	93.5728	82.5549	105.705	85.9358	94.9709	protein_coding_gene	Scaffold-207	346434	353919	+	3552	-	- && Q62622.3 RecName: Full=Eukaryotic translation initiation factor 4E-binding protein 1; Short=4E-BP1; Short=eIF4E-binding protein 1; AltName: Full=Phosphorylated heat- and acid-stable protein regulated by insulin 1; Short=PHAS-I && PF05456:Eukaryotic translation initiation factor 4E binding protein (EIF4EBP)	-
Scaffold-47.36	21.706	46.4783	156.189	67.741	91.7263	149.431	98.9894	133.052	56.8277	protein_coding_gene	Scaffold-47	436288	468341	-	2136	-	- && - && -	-
Scaffold-102.61	107.534	82.7087	59.5555	91.2879	100.311	109.643	82.0712	124.355	64.1968	protein_coding_gene	Scaffold-102	1283984	1284293	-	220	-	- && - && -	-
Scaffold-327.10	70.9422	70.9611	76.8559	150.108	97.6441	103.739	92.9362	79.0734	78.0605	protein_coding_gene	Scaffold-327	61416	100294	+	1044	-	- && Q4QQW5.1 RecName: Full=Cyclin-related protein FAM58A; AltName: Full=CDK10-activating cyclin; AltName: Full=Cyclin-M && PF00134:Cyclin, N-terminal domain	-
Scaffold-155.31	98.2966	89.3739	72.0713	76.5011	59.2846	152.019	87.4192	112.118	73.1199	protein_coding_gene	Scaffold-155	801404	805232	+	924	-	- && - && -	-
Scaffold-370.5	84.1638	87.2336	88.5832	166.18	67.3744	86.4665	84.9638	77.2246	76.8104	protein_coding_gene	Scaffold-370	73356	88712	-	1671	-	- && P34528.2 RecName: Full=Putative serine protease K12H4.7; Flags: Precursor && PF05577:Serine carboxypeptidase S28	Peptidase_S28
Scaffold-15.147	88.4142	86.319	80.9039	122.967	92.6847	92.829	88.2869	80.0314	86.1805	protein_coding_gene	Scaffold-15	3362413	3379923	-	3777	-	- && Q8MMC4.1 RecName: Full=Protein CDV3 homolog; AltName: Full=Protein anon-2C9 && PF15359:Carnitine deficiency-associated protein 3	-
Scaffold-37.50	78.4143	89.9798	81.5949	136.572	73.8896	113.335	89.2704	71.5018	81.8364	protein_coding_gene	Scaffold-37	1150423	1165860	-	990	-	- && P35039.2 RecName: Full=Trypsin-5; Flags: Precursor && PF00089:Trypsin	Trypsin
Scaffold-143.36	86.5049	63.525	62.4524	208.582	72.9883	76.3913	95.2527	75.3645	74.9096	protein_coding_gene	Scaffold-143	661952	699661	+	3837	-	- && O77460.3 RecName: Full=Inorganic pyrophosphatase; AltName: Full=Nucleosome-remodeling factor 38 kDa subunit; AltName: Full=Pyrophosphate phospho-hydrolase; Short=PPase && PF04882:Peroxin-3|PF00719:Inorganic pyrophosphatase	Pyrophosphatase
Scaffold-18.166	90.5412	69.6046	74.4729	162.474	82.1262	93.9396	92.3233	77.7976	69.4568	protein_coding_gene	Scaffold-18	3414616	3422123	+	948	-	- && Q5F285.1 RecName: Full=Transmembrane protein 256; Flags: Precursor && PF04241:Protein of unknown function (DUF423)	-
Scaffold-28.69	92.3666	80.0128	100.864	134.525	81.1862	86.9811	73.9218	86.5475	74.5244	protein_coding_gene	Scaffold-28	1235834	1258583	+	3255	-	- && Q865F1.1 RecName: Full=Microsomal triglyceride transfer protein large subunit; Flags: Precursor && PF01347:Lipoprotein amino terminal region	Vitellogenin_N
Scaffold-61.22	67.0946	98.4974	93.8548	54.202	95.7393	105.812	88.6774	90.6367	116.149	protein_coding_gene	Scaffold-61	457314	468440	+	2229	-	- && Q9FRL3.1 RecName: Full=Sugar transporter ERD6-like 6 && PF00083:Sugar (and other) transporter	Sugar_tr
Scaffold-72.354	81.7489	59.1942	94.6528	169.195	55.8807	101.948	76.6441	94.5429	76.5201	protein_coding_gene	Scaffold-72	6559171	6562973	+	429	-	- && - && -	-
Scaffold-73.81	93.3029	89.3638	76.6703	110.021	95.7766	98.1536	87.9138	78.7023	80.1411	protein_coding_gene	Scaffold-73	1594798	1601268	+	1055	-	- && P62311.2 RecName: Full=U6 snRNA-associated Sm-like protein LSm3 >P62310.2 RecName: Full=U6 snRNA-associated Sm-like protein LSm3 >Q32PE9.3 RecName: Full=U6 snRNA-associated Sm-like protein LSm3 && PF01423:LSM domain	LSM
Scaffold-208.31	81.6066	83.3641	76.794	161.265	76.3437	96.0389	79.7085	71.152	82.3075	protein_coding_gene	Scaffold-208	740636	746127	-	1011	-	- && Q9VFJ2.1 RecName: Full=39S ribosomal protein L11, mitochondrial; Short=L11mt; Short=MRP-L11; Flags: Precursor && PF00298:Ribosomal protein L11, RNA binding domain|PF03946:Ribosomal protein L11, N-terminal domain	-
Scaffold-1047.1	112.8	77.2357	92.345	112.955	84.601	88.7445	89.1208	88.7686	61.6656	protein_coding_gene	Scaffold-1047	815	38542	+	2541	-	- && Q26609.2 RecName: Full=Hexokinase && PF03727:Hexokinase|PF00058:Low-density lipoprotein receptor repeat class B	-
Scaffold-19.155	77.7307	79.6079	97.9272	123.287	74.2935	107.009	99.8702	77.4609	70.2316	protein_coding_gene	Scaffold-19	3662548	3685183	+	962	-	- && - && -	-
Scaffold-20.187	89.692	76.6183	78.8431	135.296	64.244	90.2568	101.65	87.7743	82.131	protein_coding_gene	Scaffold-20	5219705	5244442	-	1177	-	- && Q90Z08.2 RecName: Full=Protein unc-119 homolog B; AltName: Full=Protein unc-119 homolog 1 && PF05351:GMP-PDE, delta subunit	-
Scaffold-204.11	56.0001	78.8879	84.0673	63.3298	110.69	117.382	94.653	87.5409	113.514	protein_coding_gene	Scaffold-204	223598	232549	+	1261	-	- && A5A761.1 RecName: Full=Sideroflexin-1 && PF03820:Tricarboxylate carrier	-
Scaffold-118.173	85.3203	84.6749	68.1371	150.068	73.5386	101.107	81.1309	71.5806	89.9097	protein_coding_gene	Scaffold-118	2541860	2542153	+	294	-	- && Q3E731.1 RecName: Full=Cytochrome c oxidase assembly protein COX19 && -	-
Scaffold-565.12	73.5107	103.096	99.0771	60.4497	94.6881	100.441	80.2668	95.5408	98.2876	protein_coding_gene	Scaffold-565	210415	224205	+	1635	-	- && P47738.1 RecName: Full=Aldehyde dehydrogenase, mitochondrial; AltName: Full=AHD-M1; AltName: Full=ALDH class 2; AltName: Full=ALDH-E2; AltName: Full=ALDHI; Flags: Precursor && PF00171:Aldehyde dehydrogenase family	Aldedh
Scaffold-24.205	101.166	89.3352	104.067	96.1901	93.5565	69.8054	90.7523	84.777	75.1115	protein_coding_gene	Scaffold-24	5414778	5426180	-	1644	-	- && - && PF00019:Transforming growth factor beta like domain	-
Scaffold-24.144	81.6523	83.6823	114.525	13.7314	99.7439	84.888	74.6711	113.768	137.538	protein_coding_gene	Scaffold-24	3696190	3709918	+	1405	-	- && P49432.2 RecName: Full=Pyruvate dehydrogenase E1 component subunit beta, mitochondrial; Short=PDHE1-B; Flags: Precursor && PF02780:Transketolase, C-terminal domain|PF02779:Transketolase, pyrimidine binding domain	-
Scaffold-148.56	75.8127	77.525	79.6826	102.297	95.8837	121.482	75.6346	91.4694	84.0383	protein_coding_gene	Scaffold-148	960310	968357	-	1416	-	- && Q3ZBX6.1 RecName: Full=39S ribosomal protein L3, mitochondrial; Short=L3mt; Short=MRP-L3 && PF00297:Ribosomal protein L3	-
Scaffold-56.24	82.424	85.0296	70.6323	120.197	93.2482	106.322	76.5261	82.6861	85.4071	protein_coding_gene	Scaffold-56	720039	728956	-	1438	-	- && Q0Z7W6.1 RecName: Full=Thioredoxin-related transmembrane protein 1; AltName: Full=Thioredoxin domain-containing protein 1; Flags: Precursor && PF00085:Thioredoxin	-
Scaffold-73.2	67.6857	83.1045	86.9623	139.347	84.7503	88.2677	91.9881	76.3592	82.886	protein_coding_gene	Scaffold-73	23702	41019	-	2062	-	- && - && PF08790:LYAR-type C2HC zinc finger	-
Scaffold-4.69	85.9242	85.1116	103.27	56.8464	50.886	180.483	48.2395	84.9249	105.563	protein_coding_gene	Scaffold-4	1028348	1042242	-	1836	-	- && O16099.2 RecName: Full=Maltase 2; Flags: Precursor && PF00128:Alpha amylase, catalytic domain	-
Scaffold-509.5	134.821	99.3178	94.7991	24.0308	71.05	65.483	120.974	98.0334	89.2293	protein_coding_gene	Scaffold-509	45852	116378	+	5758	-	- && P12785.3 RecName: Full=Fatty acid synthase; Includes: RecName: Full=[Acyl-carrier-protein] S-acetyltransferase; Includes: RecName: Full=[Acyl-carrier-protein] S-malonyltransferase; Includes: RecName: Full=3-oxoacyl-[acyl-carrier-protein] synthase; Includes: RecName: Full=3-oxoacyl-[acyl-carrier-protein] reductase; Includes: RecName: Full=3-hydroxyacyl-[acyl-carrier-protein] dehydratase; Incl…	Acyl_transf_1
Scaffold-93.29	87.3681	83.672	79.0653	105.49	95.2331	94.9999	81.8299	82.5615	87.5031	protein_coding_gene	Scaffold-93	771448	775457	+	4010	-	- && A3KMV5.1 RecName: Full=Ubiquitin-like modifier-activating enzyme 1; AltName: Full=Ubiquitin-activating enzyme E1 && PF16191:Ubiquitin-activating enzyme E1 four-helix bundle|PF00899:ThiF family|PF10585:Ubiquitin-activating enzyme active site|PF16190:Ubiquitin-activating enzyme E1 FCCH domain|PF09358:Ubiquitin fold domain	-
Scaffold-18.170	83.6927	72.0608	72.2241	171.711	79.5818	86.6665	86.1691	74.4215	69.6288	protein_coding_gene	Scaffold-18	3508490	3525299	-	2027	-	- && Q498J9.2 RecName: Full=Metallo-beta-lactamase domain-containing protein 1 && PF00753:Metallo-beta-lactamase superfamily|PF15797:Domain of unknown function (DUF4706)|PF06645:Microsomal signal peptidase 12 kDa subunit (SPC12)	Lactamase_B
Scaffold-26.51	79.0803	82.9476	72.9835	149.777	80.7681	83.0062	106.054	63.9123	77.4912	protein_coding_gene	Scaffold-26	979013	994741	-	681	-	- && - && PF02037:SAP domain	SAP
Scaffold-1334.3	65.9021	85.307	73.954	158.709	79.5522	96.0042	90.2095	75.0359	71.225	protein_coding_gene	Scaffold-1334	13023	15770	+	552	-	- && Q4R6U7.1 RecName: Full=39S ribosomal protein L30, mitochondrial; Short=L30mt; Short=MRP-L30; Flags: Precursor && -	-
Scaffold-151.8	88.3997	88.7621	70.6267	148.76	75.5793	87.2696	71.8815	84.0071	79.523	protein_coding_gene	Scaffold-151	109322	113270	-	624	-	- && P11064.3 RecName: Full=Low molecular weight phosphotyrosine protein phosphatase; Short=LMW-PTP; Short=LMW-PTPase; AltName: Full=Low molecular weight cytosolic acid phosphatase && PF01451:Low molecular weight phosphotyrosine protein phosphatase	LMWPc
Scaffold-394.12	82.5785	57.6215	105.023	96.9223	79.2589	85.1472	114.649	73.8519	99.7373	protein_coding_gene	Scaffold-394	221677	222141	+	465	-	- && - && -	-
Scaffold-169.38	92.7675	73.9724	87.4821	108.573	91.4301	95.6244	76.3383	87.7449	80.6925	protein_coding_gene	Scaffold-169	728253	736082	-	1088	-	- && Q75UQ2.1 RecName: Full=Craniofacial development protein 1; AltName: Full=Bucentaur && PF07572:Bucentaur or craniofacial development	-
Scaffold-193.16	124.39	78.8524	82.7109	65.0414	98.8161	87.9166	95.2804	81.2821	78.2471	protein_coding_gene	Scaffold-193	253755	311724	-	2655	-	- && Q5SPP0.1 RecName: Full=Clavesin-2; AltName: Full=Retinaldehyde-binding protein 1-like 2 && PF00650:CRAL/TRIO domain	-
Scaffold-304.36	692.157	13.5269	3.47482	0	37.017	17.9622	4.86276	1.32743	21.9326	protein_coding_gene	Scaffold-304	386097	389461	+	1153	-	- && - && -	-
Scaffold-694.6	66.1427	89.6559	68.9455	86.0699	100.312	103.407	84.2338	90.534	101.982	protein_coding_gene	Scaffold-694	166364	188011	+	2315	-	- && Q07152.1 RecName: Full=Inosine-5'-monophosphate dehydrogenase; Short=IMP dehydrogenase; Short=IMPD; Short=IMPDH; AltName: Full=Protein raspberry && PF00478:IMP dehydrogenase / GMP reductase domain	-
Scaffold-1366.1	51.8824	62.5894	58.9078	226.674	75.6089	94.2341	88.5229	61.6845	70.009	protein_coding_gene	Scaffold-1366	4389	14787	-	1329	-	- && Q9V411.1 RecName: Full=Nucleolar GTP-binding protein 1; AltName: Full=Novel nucleolar protein 1 && PF08155:NOGCT (NUC087) domain|PF02421:Ferrous iron transport protein B|PF06858:Nucleolar GTP-binding protein 1 (NOG1)	-
Scaffold-218.37	89.5114	62.6657	84.8569	129.92	81.4909	81.3766	95.4646	98.9714	63.6808	protein_coding_gene	Scaffold-218	718378	727796	+	1530	-	- && Q6VEU1.1 RecName: Full=RNA-binding protein NOB1 && PF08772:Nin one binding (NOB1) Zn-ribbon like	-
Scaffold-10.226	82.9021	77.4844	82.8929	115.743	84.0646	92.5782	90.1707	85.5027	76.4908	protein_coding_gene	Scaffold-10	4116736	4146282	+	4107	-	- && B0WR18.1 RecName: Full=Eukaryotic translation initiation factor 3 subunit L; Short=eIF3l && PF10255:RNA polymerase I-associated factor PAF67	-
Scaffold-173.41	92.0894	83.0411	103.434	48.9751	136.433	118.189	50.1389	67.3888	88.0925	protein_coding_gene	Scaffold-173	549501	569351	+	1340	-	- && A6QPN6.1 RecName: Full=Gamma-interferon-inducible lysosomal thiol reductase; AltName: Full=IFI30 protein; Flags: Precursor && PF03227:Gamma interferon inducible lysosomal thiol reductase (GILT)	-
Scaffold-73.23	84.2284	63.9533	94.0663	103.351	92.7798	99.9833	83.7625	88.5761	75.8343	protein_coding_gene	Scaffold-73	415989	435054	+	1729	-	- && Q2KJC9.4 RecName: Full=Alpha-aminoadipic semialdehyde dehydrogenase; Short=Alpha-AASA dehydrogenase; AltName: Full=Aldehyde dehydrogenase family 7 member A1; AltName: Full=Antiquitin-1; AltName: Full=Betaine aldehyde dehydrogenase; AltName: Full=Delta1-piperideine-6-carboxylate dehydrogenase; Short=P6c dehydrogenase; Flags: Precursor && PF00171:Aldehyde dehydrogenase family	Aldedh
Scaffold-15.161	79.5365	84.3973	91.9029	113.666	79.8374	88.6794	83.2114	81.6247	83.4144	protein_coding_gene	Scaffold-15	3706383	3722522	-	1970	-	- && Q9Z2I8.3 RecName: Full=Succinate--CoA ligase [GDP-forming] subunit beta, mitochondrial; AltName: Full=GTP-specific succinyl-CoA synthetase subunit beta; AltName: Full=Succinyl-CoA synthetase beta-G chain; Short=SCS-betaG; Flags: Precursor && PF08442:ATP-grasp domain|PF00549:CoA-ligase	-
Scaffold-4.85	79.6212	88.6916	96.2412	87.573	82.7774	83.4696	90.478	84.8594	91.3914	protein_coding_gene	Scaffold-4	1351138	1439561	+	3570	-	- && Q1HRV8.2 RecName: Full=Elongation of very long chain fatty acids protein AAEL008004; AltName: Full=3-keto acyl-CoA synthase AAEL008004; AltName: Full=Very-long-chain 3-oxoacyl-CoA synthase AAEL008004 && PF01151:GNS1/SUR4 family	ELO
Scaffold-142.7	94.4029	71.9237	64.8124	122.211	94.0687	105.271	69.8923	87.2728	73.2536	protein_coding_gene	Scaffold-142	124294	186652	+	1928	-	- && C9JJ37.1 RecName: Full=BTB/POZ domain-containing protein 19 && PF00651:BTB/POZ domain|PF07707:BTB And C-terminal Kelch|PF07534:TLD	BTB
Scaffold-97.172	81.4919	72.8331	73.4499	119.594	94.0547	101.74	75.1042	88.6291	75.2476	protein_coding_gene	Scaffold-97	3479962	3483606	+	1116	-	- && O08583.3 RecName: Full=THO complex subunit 4; Short=Tho4; AltName: Full=Ally of AML-1 and LEF-1; AltName: Full=Aly/REF export factor; AltName: Full=REF1-I; AltName: Full=RNA and export factor-binding protein 1; AltName: Full=Transcriptional coactivator Aly/REF && PF00076:RNA recognition motif. (a.k.a. RRM, RBD, or RNP domain)|PF13865:C-terminal duplication domain of Friend of PRMT1	RRM_1
Scaffold-169.44	85.7737	23.4435	189.768	7.53031	89.1492	127.979	56.2911	162.328	38.9009	protein_coding_gene	Scaffold-169	867319	881632	+	1386	-	- && - && -	-
Scaffold-181.5	101.69	80.1333	78.7046	109.56	86.1874	83.8273	90.0897	75.3147	75.4943	protein_coding_gene	Scaffold-181	64029	74678	+	1058	-	- && Q9JHG1.1 RecName: Full=Phosphatidylinositol N-acetylglucosaminyltransferase subunit P; AltName: Full=Down syndrome critical region protein 5 homolog; AltName: Full=Phosphatidylinositol-glycan biosynthesis class P protein; Short=PIG-P && PF08510:PIG-P|PF09341:Transcription factor Pcc1	-
Scaffold-96.149	90.6262	50.2303	14.2285	20.3209	223.504	176.324	62.5269	39.557	103.541	protein_coding_gene	Scaffold-96	3203534	3223412	-	1035	-	- && - && -	-
Scaffold-19.76	76.736	65.1981	64.9121	171.637	70.0141	88.8098	98.6692	75.2796	65.6573	protein_coding_gene	Scaffold-19	1336224	1398112	+	3760	-	- && Q9VGN9.1 RecName: Full=Probable ribosome biogenesis protein RLP24 && PF01246:Ribosomal protein L24e	-
Scaffold-525.3	72.2697	80.6599	79.8968	133.299	76.8335	93.0558	92.7749	73.3917	74.509	protein_coding_gene	Scaffold-525	17595	18479	+	885	-	- && - && PF04430:Protein of unknown function (DUF498/DUF598)	DUF498
Scaffold-103.101	13.3853	13.1822	5.9355	127.446	9.7916	12.9948	10.4181	8.64463	573.697	protein_coding_gene	Scaffold-103	1643056	1644675	-	675	-	- && - && -	-
Scaffold-105.55	80.9072	91.4283	88.0037	15.8695	96.4264	89.0234	103.962	101.945	107.027	protein_coding_gene	Scaffold-105	969350	998156	-	1415	-	- && - && PF01607:Chitin binding Peritrophin-A domain	CBM_14
Scaffold-923.5	197.977	40.6117	2.63035	6.18888	310.216	107.851	5.00157	2.84004	100.837	EVM%20prediction%20Scaffold-923.5	Scaffold-923	52912	53891	-	741	-	- && P80681.1 RecName: Full=Larval cuticle protein A1A; AltName: Full=TM-LCP A1A; Short=TM-A1A && PF00379:Insect cuticle protein	Chitin_bind_4
Scaffold-10.128	92.8971	64.1933	97.4841	108.017	72.2331	65.7394	136.573	68.7377	66.7472	protein_coding_gene	Scaffold-10	2563443	2573331	+	732	-	- && - && PF01812:5-formyltetrahydrofolate cyclo-ligase family	-
Scaffold-150.17	92.6968	73.5518	68.0941	122.782	84.2636	88.0152	88.227	93.9722	60.956	protein_coding_gene	Scaffold-150	355597	362148	-	908	-	- && Q7YRA3.3 RecName: Full=Exosome complex component RRP41; AltName: Full=Exosome component 4; AltName: Full=Ribosomal RNA-processing protein 41 && PF01138:3' exoribonuclease family, domain 1	RNase_PH
Scaffold-45.42	115.177	94.2646	139.446	14.6225	82.693	55.2489	57.4128	100.229	112.183	protein_coding_gene	Scaffold-45	873826	892883	+	1925	-	- && Q9GLY5.1 RecName: Full=Inter-alpha-trypsin inhibitor heavy chain H3; Short=ITI heavy chain H3; Short=ITI-HC3; Short=Inter-alpha-inhibitor heavy chain 3; Flags: Precursor && PF13519:von Willebrand factor type A domain|PF08487:Vault protein inter-alpha-trypsin domain	-
Scaffold-319.10	56.0949	59.7614	76.1415	172.704	91.3838	92.5229	82.2878	74.6072	65.344	protein_coding_gene	Scaffold-319	287784	297253	-	977	-	- && O14006.2 RecName: Full=37S ribosomal protein S9, mitochondrial; Flags: Precursor && PF00380:Ribosomal protein S9/S16	-
Scaffold-161.7	73.3727	68.1618	70.3274	161.76	86.8174	84.3264	78.3996	73.9355	72.7139	protein_coding_gene	Scaffold-161	270860	289518	-	1920	-	- && Q9VCA5.1 RecName: Full=Phenylalanine--tRNA ligase beta subunit; AltName: Full=Phenylalanyl-tRNA synthetase beta subunit; Short=PheRS && PF03484:tRNA synthetase B5 domain|PF03483:B3/4 domain	-
Scaffold-353.16	92.3658	82.3855	76.7506	96.8022	86.4808	86.199	95.2653	80.8409	72.4872	protein_coding_gene	Scaffold-353	306740	317264	+	807	-	- && Q3B8E5.1 RecName: Full=Anaphase-promoting complex subunit 15B && PF15243:Anaphase-promoting complex subunit 15	-
Scaffold-71.64	91.7191	68.4252	89.7626	107.936	81.6516	88.6359	105.245	72.9653	62.7089	protein_coding_gene	Scaffold-71	1083269	1138287	+	3777	-	- && Q8BFR2.1 RecName: Full=Follistatin-related protein 5; AltName: Full=Follistatin-like protein 5; AltName: Full=m-D/Bsp120I 1-2; Flags: Precursor && PF00722:Glycosyl hydrolases family 16|PF07679:Immunoglobulin I-set domain	I-set
Scaffold-105.56	90.9775	89.1118	81.4036	118.272	67.6457	70.8236	104.258	97.2572	49.0946	protein_coding_gene	Scaffold-105	1018642	1020196	-	1555	-	- && P53395.2 RecName: Full=Lipoamide acyltransferase component of branched-chain alpha-keto acid dehydrogenase complex, mitochondrial; AltName: Full=Branched-chain alpha-keto acid dehydrogenase complex component E2; Short=BCKAD-E2; Short=BCKADE2; AltName: Full=Dihydrolipoamide acetyltransferase component of branched-chain alpha-keto acid dehydrogenase complex; AltName: Full=Dihydrolipoamide bran…	Biotin_lipoyl
Scaffold-128.19	87.8695	70.302	74.4218	118.602	77.273	97.9904	97.6519	71.9833	72.209	protein_coding_gene	Scaffold-128	569294	576632	+	1196	-	- && Q5ZJF4.3 RecName: Full=Peroxiredoxin-6 && PF10417:C-terminal domain of 1-Cys peroxiredoxin|PF00578:AhpC/TSA family	-
Scaffold-48.91	85.5982	72.0481	69.4669	122.952	81.2821	87.2659	86.631	86.2575	72.8978	protein_coding_gene	Scaffold-48	1745996	1758233	+	1618	-	- && Q9VDE5.1 RecName: Full=Protein Peter pan && PF04427:Brix domain	-
Scaffold-6.113	75.7785	78.7248	101.835	126.126	80.5883	63.5895	86.7075	100.991	49.5212	protein_coding_gene	Scaffold-6	1904148	1957234	-	6600	-	- && Q5JVL4.1 RecName: Full=EF-hand domain-containing protein 1; AltName: Full=Myoclonin-1 && PF06565:Repeat of unknown function (DUF1126)	-
Scaffold-19.122	86.8285	76.0447	73.0943	119.671	88.0898	97.7587	74.0548	81.3768	66.566	protein_coding_gene	Scaffold-19	2654612	2667724	-	1554	-	- && - && PF16021:Programmed cell death protein 7	-
Scaffold-47.13	66.4027	97.8159	102.82	32.4821	99.7101	98.1193	59.2438	105.137	100.586	protein_coding_gene	Scaffold-47	143862	160274	+	555	-	- && Q26250.1 RecName: Full=V-type proton ATPase 16 kDa proteolipid subunit; Short=V-ATPase 16 kDa proteolipid subunit; AltName: Full=Vacuolar proton pump 16 kDa proteolipid subunit && PF00137:ATP synthase subunit C	-
Scaffold-579.9	100.049	78.8354	85.1126	83.3192	81.9089	87.1121	85.2203	83.8977	75.7265	protein_coding_gene	Scaffold-579	198598	227572	-	2790	-	- && Q9M047.1 RecName: Full=LIM domain-containing protein WLIM2b; AltName: Full=Widely-expressed LIM protein 2B && PF00412:LIM domain	LIM
Scaffold-59.60	79.3186	81.0108	88.7849	90.509	94.0124	94.7971	75.6266	72.743	83.154	protein_coding_gene	Scaffold-59	1266964	1268667	+	622	-	- && Q9Y421.2 RecName: Full=Protein FAM32A; AltName: Full=Ovarian tumor-associated gene 12; Short=OTAG-12 >Q5R9E5.1 RecName: Full=Protein FAM32A; AltName: Full=Ovarian tumor associated gene 12; Short=OTAG-12 >A6QR31.1 RecName: Full=Protein FAM32A; AltName: Full=Ovarian tumor associated gene 12; Short=OTAG-12 && -	-
Scaffold-35.103	87.2364	58.9974	69.3826	174.714	62.2787	79.3519	93.3508	70.4194	64.1804	protein_coding_gene	Scaffold-35	1973040	1986445	-	849	-	- && - && PF08695:Cytochrome oxidase complex assembly protein 1	-
Scaffold-98.55	69.8463	77.7827	72.7695	123.561	80.2415	90.2868	87.6365	86.5475	68.9306	protein_coding_gene	Scaffold-98	1413500	1438718	+	1491	-	- && - && PF10501:Ribosomal subunit 39S	-
Scaffold-420.12	75.6815	103.207	110.76	39.8002	86.9946	91.1645	75.4611	82.2683	92.0883	protein_coding_gene	Scaffold-420	208781	213195	+	743	-	- && Q91VS7.3 RecName: Full=Microsomal glutathione S-transferase 1; Short=Microsomal GST-1; AltName: Full=Microsomal GST-I && PF01124:MAPEG family	-
Scaffold-48.77	78.8875	79.6357	95.9989	79.1647	74.9914	87.4389	84.8522	84.6194	91.4466	protein_coding_gene	Scaffold-48	1443636	1481400	+	4099	-	- && Q8MT06.2 RecName: Full=Guanine nucleotide-binding protein-like 3 homolog; AltName: Full=Nucleostemin 1; AltName: Full=Nucleostemin homolog && PF01926:50S ribosome-binding GTPase|PF00083:Sugar (and other) transporter|PF08701:GNL3L/Grn1 putative GTPase	Sugar_tr
Scaffold-70.73	88.793	81.9226	74.6366	99.1459	87.9625	86.8938	80.0168	76.4313	80.1413	protein_coding_gene	Scaffold-70	1617607	1630913	+	3627	-	- && Q99615.2 RecName: Full=DnaJ homolog subfamily C member 7; AltName: Full=Tetratricopeptide repeat protein 2; Short=TPR repeat protein 2 && PF00515:Tetratricopeptide repeat|PF00226:DnaJ domain|PF13414:TPR repeat	DnaJ
Scaffold-87.4	64.9007	101.654	71.9929	19.0939	87.4273	96.7441	108.784	98.8414	106.457	protein_coding_gene	Scaffold-87	90637	118716	+	3876	-	- && Q4KMC4.3 RecName: Full=Glutamine--fructose-6-phosphate aminotransferase [isomerizing] 2; AltName: Full=D-fructose-6-phosphate amidotransferase 2; AltName: Full=Glutamine:fructose-6-phosphate amidotransferase 2; Short=GFAT 2; Short=GFAT2; AltName: Full=Hexosephosphate aminotransferase 2 && PF01380:SIS domain|PF13522:Glutamine amidotransferase domain|PF00078:Reverse transcriptase (RNA-dependen…	RVT_1
Scaffold-59.34	75.3753	105.804	86.5757	69.177	89.0435	74.3072	73.8382	88.7454	92.8325	protein_coding_gene	Scaffold-59	876081	890192	+	1287	-	- && P30352.1 RecName: Full=Serine/arginine-rich splicing factor 2; AltName: Full=Protein PR264; AltName: Full=Splicing component, 35 kDa; AltName: Full=Splicing factor SC35; Short=SC-35; AltName: Full=Splicing factor, arginine/serine-rich 2 && PF00076:RNA recognition motif. (a.k.a. RRM, RBD, or RNP domain)|PF08315:cwf18 pre-mRNA splicing factor	RRM_1
Scaffold-257.11	80.6025	75.7428	82.8183	99.8937	88.9209	91.2372	79.352	75.5156	80.9961	protein_coding_gene	Scaffold-257	206496	220374	+	1382	-	- && Q9VXK6.1 RecName: Full=Eukaryotic translation initiation factor 5; Short=eIF-5 && PF01873:Domain found in IF2B/IF5|PF02020:eIF4-gamma/eIF5/eIF2-epsilon	-
Scaffold-11.139	65.4656	77.6853	96.5765	93.4928	139.839	93.8389	71.2724	58.8166	58.0303	protein_coding_gene	Scaffold-11	2779444	2782951	-	592	-	- && P08905.2 RecName: Full=Lysozyme C-2; AltName: Full=1,4-beta-N-acetylmuramidase C; AltName: Full=Lysozyme C type M; Flags: Precursor && PF00062:C-type lysozyme/alpha-lactalbumin family	-
Scaffold-148.33	69.2341	93.0826	81.3158	99.9713	123.611	79.817	64.8096	58.2743	84.459	protein_coding_gene	Scaffold-148	466983	467311	-	261	-	- && - && -	-
Scaffold-3.21	99.8655	65.2347	103.778	119.502	64.2372	68.2069	80.6585	90.0515	62.1563	protein_coding_gene	Scaffold-3	357535	373697	-	4351	-	- && Q05319.2 RecName: Full=Serine proteinase stubble; AltName: Full=Protein stubble-stubbloid; Contains: RecName: Full=Serine proteinase stubble non-catalytic chain; Contains: RecName: Full=Serine proteinase stubble catalytic chain && PF00089:Trypsin	Trypsin
Scaffold-36.23	78.9066	73.1103	73.499	156.125	77.3587	77.8176	70.9647	66.3454	77.5294	protein_coding_gene	Scaffold-36	413698	426980	+	4324	-	- && Q7Q9C0.5 RecName: Full=Enolase-phosphatase E1; AltName: Full=2,3-diketo-5-methylthio-1-phosphopentane phosphatase && PF13419:Haloacid dehalogenase-like hydrolase	-
Scaffold-4.165	66.3986	87.0034	56.2078	105.625	80.0975	120.586	89.5892	69.8569	75.2737	protein_coding_gene	Scaffold-4	2888255	2901197	+	786	-	- && Q9VBV3.1 RecName: Full=Protein takeout; Flags: Precursor && PF06585:Haemolymph juvenile hormone binding protein (JHBP)	-
Scaffold-11.16	75.0985	80.3952	92.8384	84.8798	80.868	95.4957	89.4043	77.1875	73.7413	protein_coding_gene	Scaffold-11	331479	374796	+	2517	-	- && Q71R50.1 RecName: Full=Dehydrogenase/reductase SDR family member 11; AltName: Full=Short-chain dehydrogenase/reductase family 24C member 1; Flags: Precursor && PF00106:short chain dehydrogenase	adh_short
Scaffold-18.229	69.8395	73.6127	64.932	187.314	69.9044	83.1258	75.6765	66.1029	59.2997	protein_coding_gene	Scaffold-18	4501757	4509916	+	1149	-	- && Q9V9Z1.1 RecName: Full=39S ribosomal protein L32, mitochondrial; Short=L32mt; Short=MRP-L32; Flags: Precursor && -	-
Scaffold-49.70	85.6527	91.0285	92.406	36.3861	109.008	88.844	78.8001	79.4784	88.1435	protein_coding_gene	Scaffold-49	1638039	1645627	-	1821	-	- && P54357.1 RecName: Full=Myosin-2 essential light chain; AltName: Full=Myosin II essential light chain; AltName: Full=Non-muscle myosin essential light chain && -	-
Scaffold-260.14	70.7274	61.1677	62.5938	158.804	69.4823	124.91	69.3677	70.2298	62.0078	protein_coding_gene	Scaffold-260	338381	342857	+	237	-	- && - && -	-
Scaffold-14.82	82.6611	75.8847	75.2079	140.175	76.4298	79.7525	69.6496	75.983	73.3833	protein_coding_gene	Scaffold-14	1734772	1768693	-	1303	-	- && Q6K9U2.1 RecName: Full=Replication protein A 32 kDa subunit A; Short=OsRPA32A; AltName: Full=OsRPA32-1; AltName: Full=Replication factor A protein 2A; AltName: Full=Replication protein A 2A && PF08784:Replication protein A C terminal	-
Scaffold-117.17	55.2827	68.6403	80.5065	119.416	74.1438	108.206	78.6701	95.2641	68.6582	protein_coding_gene	Scaffold-117	174836	192937	-	1458	-	- && Q9VW26.1 RecName: Full=Ornithine aminotransferase, mitochondrial; AltName: Full=Ornithine--oxo-acid aminotransferase; Flags: Precursor && PF00202:Aminotransferase class-III	Aminotran_3
Scaffold-99.46	72.3441	81.2252	78.9015	63.4046	86.5843	100.131	85.6169	94.7506	84.9698	protein_coding_gene	Scaffold-99	841586	859316	-	1898	-	- && Q17Q06.1 RecName: Full=Eukaryotic translation initiation factor 3 subunit C; Short=eIF3c; AltName: Full=Eukaryotic translation initiation factor 3 subunit 8 && PF05470:Eukaryotic translation initiation factor 3 subunit 8 N-terminus	-
Scaffold-15.58	82.271	80.6498	77.1608	111.189	81.2644	82.0188	79.2022	74.3588	79.5854	protein_coding_gene	Scaffold-15	1061176	1096805	-	7397	-	- && P29742.1 RecName: Full=Clathrin heavy chain && PF09268:Clathrin, heavy-chain linker|PF00637:Region in Clathrin and VPS|PF13838:Clathrin-H-link|PF01394:Clathrin propeller repeat	-
Scaffold-357.15	121.755	82.2187	69.2816	85.047	21.0011	27.4722	232.961	87.055	19.299	protein_coding_gene	Scaffold-357	268345	287678	+	2235	-	- && P22673.2 RecName: Full=Uricase; AltName: Full=Urate oxidase && PF02535:ZIP Zinc transporter|PF01014:Uricase	-
Scaffold-108.66	132.324	83.2412	13.1445	7.7404	116.628	150.031	75.261	37.3641	128.358	protein_coding_gene	Scaffold-108	1034221	1037879	-	2043	-	- && Q9V7U0.1 RecName: Full=Pro-resilin; Flags: Precursor && -	-
Scaffold-122.94	75.3354	93.4236	96.6388	37.7381	93.8567	78.3917	79.237	88.2868	101.08	protein_coding_gene	Scaffold-122	2030027	2059052	-	1739	-	- && H9BW96.1 RecName: Full=Ras-related protein rab7 && PF06966:Protein of unknown function (DUF1295)|PF00071:Ras family	Ras
Scaffold-102.43	86.5267	62.5976	81.3423	125.748	78.8392	81.636	92.1561	75.9345	59.093	protein_coding_gene	Scaffold-102	975473	988882	+	1455	-	- && Q9VX98.3 RecName: Full=Density-regulated protein homolog && PF00089:Trypsin|PF01253:Translation initiation factor SUI1	Trypsin
Scaffold-570.3	148.47	70.9482	87.221	41.2183	57.2671	40.5631	165.556	81.7166	50.6558	protein_coding_gene	Scaffold-570	67309	85695	-	1784	-	- && Q27601.2 RecName: Full=Amidophosphoribosyltransferase; Short=ATase; AltName: Full=Glutamine phosphoribosylpyrophosphate amidotransferase; Short=GPAT; Flags: Precursor && PF00156:Phosphoribosyl transferase domain|PF13522:Glutamine amidotransferase domain	Pribosyltran
Scaffold-36.57	86.5815	69.7593	79.2101	140.34	73.481	75.2109	83.2657	63.5155	71.6474	protein_coding_gene	Scaffold-36	1053154	1055342	-	622	-	- && Q2KIU0.1 RecName: Full=Vesicle transport through interaction with t-SNAREs homolog 1B && PF12352:Snare region anchored in the vesicle membrane C-terminus	-
Scaffold-44.49	69.0459	73.0531	74.2028	117.397	84.8347	81.0328	89.233	84.7946	69.295	protein_coding_gene	Scaffold-44	814419	818993	-	1541	-	- && Q6P635.1 RecName: Full=COP9 signalosome complex subunit 5; Short=Signalosome subunit 5 && PF01398:JAB1/Mov34/MPN/PAD-1 ubiquitin protease	Mov34
Scaffold-87.49	76.5732	79.5829	74.6487	125.185	70.5185	85.9425	86.0543	77.262	66.2511	protein_coding_gene	Scaffold-87	1130163	1142805	-	2054	-	- && Q9D554.2 RecName: Full=Splicing factor 3A subunit 3; AltName: Full=SF3a60; AltName: Full=Spliceosome-associated protein 61; Short=SAP 61 && PF11931:Domain of unknown function (DUF3449)|PF13297:Telomere stability C-terminal|PF16837:Pre-mRNA-splicing factor SF3A3, of SF3a complex, Prp9|PF12108:Splicing factor SF3a60 binding domain	-
Scaffold-350.19	131.202	82.9162	80.6606	72.3683	53.8118	74.9228	105.299	84.5302	56.0958	protein_coding_gene	Scaffold-350	407417	450501	-	3387	-	- && Q26636.1 RecName: Full=Cathepsin L; Contains: RecName: Full=Cathepsin L heavy chain; Contains: RecName: Full=Cathepsin L light chain; Flags: Precursor && PF08565:Cdc37 Hsp90 binding domain|PF03234:Cdc37 N terminal kinase binding|PF08246:Cathepsin propeptide inhibitor domain (I29)|PF00112:Papain family cysteine protease	Peptidase_C1
Scaffold-403.4	70.2032	72.2527	76.5176	136.391	77.6199	92.1373	76.2271	75.8539	63.4969	protein_coding_gene	Scaffold-403	94870	110308	+	1309	-	- && Q9VCX3.1 RecName: Full=Probable 39S ribosomal protein L45, mitochondrial; Short=L45mt; Short=MRP-L45; Flags: Precursor && PF04280:Tim44-like domain	-
Scaffold-61.17	83.3767	83.8435	77.682	96.0913	82.4211	79.7576	80.3847	71.8805	83.9325	protein_coding_gene	Scaffold-61	354884	397711	-	2615	-	- && Q8WQA4.2 RecName: Full=Chloride intracellular channel exc-4; AltName: Full=Excretory canal abnormal protein 4 && -	-
Scaffold-290.115	148.586	85.553	75.8398	45.8062	45.6388	39.5311	172.356	103.748	21.5754	protein_coding_gene	Scaffold-290	983798	1005032	-	1809	-	- && Q9VA27.1 RecName: Full=Cytochrome P450 4c3; AltName: Full=CYPIVC3 && PF00067:Cytochrome P450	p450
Scaffold-50.51	76.489	68.0051	67.1042	125.961	75.1555	90.0811	81.3622	76.4372	78.0295	protein_coding_gene	Scaffold-50	602319	618575	+	2364	-	- && Q29381.2 RecName: Full=Dolichyl-diphosphooligosaccharide--protein glycosyltransferase 48 kDa subunit; Short=DDOST 48 kDa subunit; Short=Oligosaccharyl transferase 48 kDa subunit; Flags: Precursor && PF03345:Oligosaccharyltransferase 48 kDa subunit beta|PF09420:Ribosome biogenesis protein Nop16	-
Scaffold-95.7	84.0165	72.3024	69.9236	124.919	83.9546	75.0366	87.7133	81.3538	58.7345	protein_coding_gene	Scaffold-95	89615	101622	-	2247	-	- && O16098.2 RecName: Full=Maltase 1; Flags: Precursor && PF00128:Alpha amylase, catalytic domain|PF16028:Solute carrier family 3 member 2 N-terminus	-
Scaffold-334.7	85.6976	84.2424	80.6293	89.2232	76.4281	64.3046	109.633	81.5967	63.7601	protein_coding_gene	Scaffold-334	166312	172656	+	1347	-	- && Q6DHC1.1 RecName: Full=Ras-related protein Rab-18-B; Flags: Precursor && PF00071:Ras family	Ras
Scaffold-523.25	91.5834	91.6091	79.1667	65.7145	100.073	69.8469	62.7197	92.3983	81.9264	protein_coding_gene	Scaffold-523	263068	281138	+	1350	-	- && Q3T0R7.1 RecName: Full=3-ketoacyl-CoA thiolase, mitochondrial; AltName: Full=Acetyl-CoA acyltransferase; AltName: Full=Beta-ketothiolase; AltName: Full=Mitochondrial 3-oxoacyl-CoA thiolase && PF00108:Thiolase, N-terminal domain|PF02803:Thiolase, C-terminal domain	Thiolase_N
Scaffold-1.20	93.8545	56.8294	57.7508	164.24	57.78	87.6292	101.032	68.4708	47.2116	protein_coding_gene	Scaffold-1	473445	474697	-	285	-	- && - && -	-
Scaffold-18.89	101.338	83.4077	91.5967	54.9208	67.0675	62.3309	109.187	82.2087	81.6111	protein_coding_gene	Scaffold-18	1945100	1952647	+	2148	-	- && Q78EG7.1 RecName: Full=Protein tyrosine phosphatase type IVA 1; AltName: Full=Protein-tyrosine phosphatase 4a1; AltName: Full=Protein-tyrosine phosphatase of regenerating liver 1; Short=PRL-1; Flags: Precursor >Q63739.1 RecName: Full=Protein tyrosine phosphatase type IVA 1; AltName: Full=Protein-tyrosine phosphatase 4a1; AltName: Full=Protein-tyrosine phosphatase of regenerating liver 1; Sho…	DSPc
Scaffold-3.60	85.0836	74.8896	75.691	95.1403	78.0381	80.6781	94.2533	77.8746	71.6114	protein_coding_gene	Scaffold-3	1093440	1112356	-	2937	-	- && Q24572.1 RecName: Full=Probable histone-binding protein Caf1; AltName: Full=Chromatin assembly factor 1 p55 subunit; Short=CAF-1 p55 subunit; AltName: Full=Nucleosome-remodeling factor 55 kDa subunit; Short=NURF-55; AltName: Full=dCAF-1 && PF00400:WD domain, G-beta repeat|PF12265:Histone-binding protein RBBP4 or subunit C of CAF1 complex	WD40
Scaffold-288.27	61.9824	115.059	99.852	48.0401	78.186	91.4224	67.8124	83.2226	86.4388	protein_coding_gene	Scaffold-288	488505	509187	+	2877	-	- && Q962X9.1 RecName: Full=Protein BUD31 homolog; AltName: Full=Protein G10 homolog [Branchiostoma belcheri] && PF01125:G10 protein|PF00089:Trypsin|PF00078:Reverse transcriptase (RNA-dependent DNA polymerase)|PF00075:RNase H	RVT_1
Scaffold-97.175	89.0974	75.1725	71.8662	105.767	80.5616	90.3147	73.8692	71.0704	73.9461	protein_coding_gene	Scaffold-97	3550733	3570645	-	3696	-	- && Q5ZML7.1 RecName: Full=Lysosomal-associated transmembrane protein 4A && PF03821:Golgi 4-transmembrane spanning transporter	-
Scaffold-792.1	68.7653	82.8246	81.4775	148.834	56.2858	90.7723	67.3128	56.2693	77.8858	protein_coding_gene	Scaffold-792	2281	8146	+	408	-	- && Q9VLR5.1 RecName: Full=RNA polymerase II transcriptional coactivator; AltName: Full=p11 && PF02229:Transcriptional Coactivator p15 (PC4)	-
Scaffold-27.60	73.6172	75.9118	76.2346	69.6524	86.9073	91.3018	86.9723	92.4985	76.9118	protein_coding_gene	Scaffold-27	1034881	1074447	+	3149	-	- && P12613.2 RecName: Full=T-complex protein 1 subunit alpha; Short=TCP-1-alpha; AltName: Full=CCT-alpha && PF00118:TCP-1/cpn60 chaperonin family|PF02949:7tm Odorant receptor	-
Scaffold-15.268	77.0775	80.8296	72.8118	95.1632	84.2367	84.0223	77.1278	76.4361	80.8963	protein_coding_gene	Scaffold-15	6340056	6347201	-	1911	-	- && Q5R9W3.1 RecName: Full=Derlin-1; AltName: Full=Degradation in endoplasmic reticulum protein 1; AltName: Full=Der1-like protein 1 && PF04511:Der1-like family	-
Scaffold-51.35	72.1595	62.7433	74.5474	148.793	66.9929	80.4902	73.7608	69.11	78.5121	protein_coding_gene	Scaffold-51	780039	781155	+	1117	-	- && Q2KIS2.1 RecName: Full=39S ribosomal protein L44, mitochondrial; Short=L44mt; Short=MRP-L44; Flags: Precursor && -	-
Scaffold-229.9	85.9171	85.5703	71.8733	74.3495	94.7381	78.2914	72.2061	77.9743	85.2181	protein_coding_gene	Scaffold-229	159048	183097	-	1374	-	- && P15374.1 RecName: Full=Ubiquitin carboxyl-terminal hydrolase isozyme L3; Short=UCH-L3; AltName: Full=Ubiquitin thioesterase L3 && PF01443:Viral (Superfamily 1) RNA helicase|PF01088:Ubiquitin carboxyl-terminal hydrolase, family 1	-
Scaffold-151.12	80.3693	76.4171	54.6895	98.0126	77.3069	103.463	88.5626	72.5772	74.6032	protein_coding_gene	Scaffold-151	185582	199082	-	1778	-	- && P11833.1 RecName: Full=Tubulin beta chain; AltName: Full=Beta-tubulin && PF03953:Tubulin C-terminal domain|PF00091:Tubulin/FtsZ family, GTPase domain	Tubulin
Scaffold-48.57	82.3642	79.3144	70.3567	76.4018	85.6533	102.586	73.9297	73.1087	81.1533	protein_coding_gene	Scaffold-48	999894	1035929	+	2995	-	- && - && PF03045:DAN domain	-
Scaffold-239.24	163.207	25.822	0.645394	0	248.453	144.013	2.64321	1.52039	136.506	protein_coding_gene	Scaffold-239	382027	390750	-	1510	-	- && P80683.1 RecName: Full=Larval cuticle protein A3A; AltName: Full=TM-LCP A3A; Short=TM-A3A && PF00379:Insect cuticle protein	Chitin_bind_4
Scaffold-55.42	76.7023	79.1269	69.2346	113.634	80.0837	86.0629	69.2905	71.8696	76.3824	protein_coding_gene	Scaffold-55	945025	952370	+	1894	-	- && Q5I0D1.1 RecName: Full=Glyoxalase domain-containing protein 4 && PF12681:Glyoxalase-like domain	-
Scaffold-20.216	85.108	66.2042	68.2602	124.162	74.4178	84.5464	84.956	73.4841	60.0891	protein_coding_gene	Scaffold-20	5678494	5690431	-	1415	-	- && - && PF03909:BSD domain	-
Scaffold-47.12	59.1081	98.9974	97.9701	21.0406	94.7641	87.701	60.8244	87.3513	113.471	protein_coding_gene	Scaffold-47	140061	142608	-	714	-	- && O16110.2 RecName: Full=V-type proton ATPase 16 kDa proteolipid subunit; Short=V-ATPase 16 kDa proteolipid subunit; AltName: Full=V-ATPase subunit C; AltName: Full=Vacuolar proton pump 16 kDa proteolipid subunit && PF00137:ATP synthase subunit C	-
Scaffold-189.21	79.4793	71.4384	68.4188	88.3472	91.2879	90.5553	73.4791	79.9026	77.1161	protein_coding_gene	Scaffold-189	572476	590843	-	4414	-	- && Q99L45.1 RecName: Full=Eukaryotic translation initiation factor 2 subunit 2; AltName: Full=Eukaryotic translation initiation factor 2 subunit beta; Short=eIF-2-beta && PF03372:Endonuclease/Exonuclease/phosphatase family|PF00078:Reverse transcriptase (RNA-dependent DNA polymerase)|PF01873:Domain found in IF2B/IF5	RVT_1
Scaffold-217.37	66.9782	60.7814	65.1626	156.077	71.0218	79.2412	83.3709	72.9726	63.5094	protein_coding_gene	Scaffold-217	760650	777317	-	1459	-	- && Q5ZIZ2.1 RecName: Full=SET and MYND domain-containing protein 5 && PF00856:SET domain	SET
Scaffold-201.8	142.898	73.3095	94.6266	25.7678	92.1435	50.1716	81.242	63.6295	93.8301	protein_coding_gene	Scaffold-201	244978	256101	+	896	-	- && Q93Y23.1 RecName: Full=Flavin-containing monooxygenase FMO GS-OX4; AltName: Full=Flavin-monooxygenase glucosinolate S-oxygenase 4 && PF00743:Flavin-binding monooxygenase-like	FMO-like
Scaffold-54.79	66.2494	72.8911	83.9549	108.675	68.4308	84.9741	81.2847	78.5911	72.1663	protein_coding_gene	Scaffold-54	1524929	1531795	-	1362	-	- && P03951.1 RecName: Full=Coagulation factor XI; Short=FXI; AltName: Full=Plasma thromboplastin antecedent; Short=PTA; Contains: RecName: Full=Coagulation factor XIa heavy chain; Contains: RecName: Full=Coagulation factor XIa light chain; Flags: Precursor && PF00089:Trypsin	Trypsin
Scaffold-1597.1	70.4309	77.2206	69.753	87.9959	85.2137	88.9993	72.5441	83.3939	80.4031	protein_coding_gene	Scaffold-1597	1837	7424	+	2223	-	- && P56701.2 RecName: Full=26S proteasome non-ATPase regulatory subunit 2; AltName: Full=26S proteasome regulatory subunit RPN1; AltName: Full=26S proteasome regulatory subunit S2; AltName: Full=26S proteasome subunit p97; AltName: Full=Tumor necrosis factor type 1 receptor-associated protein 2 && PF01851:Proteasome/cyclosome repeat	-
Scaffold-443.17	116.909	49.6431	11.3824	33.902	198.635	152.493	28.2592	28.1813	96.4836	protein_coding_gene	Scaffold-443	319045	323065	-	723	-	- && P80682.1 RecName: Full=Larval cuticle protein A2B; AltName: Full=TM-LCP A2B; Short=TM-A2B && PF00379:Insect cuticle protein	Chitin_bind_4
Scaffold-22.68	74.6688	94.0239	76.4063	90.4398	83.8281	65.567	63.5312	87.1668	80.2021	protein_coding_gene	Scaffold-22	1849864	1857820	-	890	-	- && Q13162.1 RecName: Full=Peroxiredoxin-4; AltName: Full=Antioxidant enzyme AOE372; Short=AOE37-2; AltName: Full=Peroxiredoxin IV; Short=Prx-IV; AltName: Full=Thioredoxin peroxidase AO372; AltName: Full=Thioredoxin-dependent peroxide reductase A0372; Flags: Precursor && PF10417:C-terminal domain of 1-Cys peroxiredoxin|PF00578:AhpC/TSA family	-
Scaffold-33.161	63.5813	65.1595	66.2626	156.563	62.8385	87.1268	75.5274	65.1996	71.096	protein_coding_gene	Scaffold-33	2771186	2775903	-	804	-	- && Q9UJK0.1 RecName: Full=Ribosome biogenesis protein TSR3 homolog && PF04034:Domain of unknown function (DUF367)|PF04068:Possible Fer4-like domain in RNase L inhibitor, RLI	-
Scaffold-169.12	75.3629	89.6004	74.0818	78.0093	86.6424	86.3387	65.1209	78.0422	79.5585	protein_coding_gene	Scaffold-169	413640	417815	-	896	-	- && O14737.3 RecName: Full=Programmed cell death protein 5; AltName: Full=TF-1 cell apoptosis-related protein 19; Short=Protein TFAR19 >Q5RBT0.3 RecName: Full=Programmed cell death protein 5 && PF01984:Double-stranded DNA-binding domain	-
Scaffold-594.6	76.8581	70.8464	68.5894	104.563	80.2515	82.6943	81.9035	76.9719	69.1821	protein_coding_gene	Scaffold-594	65042	80754	-	2447	-	- && Q7Z429.1 RecName: Full=Protein lifeguard 1; AltName: Full=Glutamate [NMDA] receptor-associated protein 1; AltName: Full=NMDA receptor glutamate-binding subunit; AltName: Full=Putative MAPK-activating protein PM02; AltName: Full=Transmembrane BAX inhibitor motif-containing protein 3 && PF01027:Inhibitor of apoptosis-promoting Bax1	-
Scaffold-90.55	74.2852	65.3071	72.6215	136.58	73.7858	89.5427	73.3709	58.2083	67.8504	protein_coding_gene	Scaffold-90	1412894	1413810	-	917	-	- && Q8GAV9.1 RecName: Full=Cyclopentanol dehydrogenase >Q937L4.1 RecName: Full=Cyclopentanol dehydrogenase && PF00106:short chain dehydrogenase	adh_short
Scaffold-70.75	89.0549	85.574	94.3233	71.7178	62.5416	61.8828	83.6575	77.2583	84.7184	protein_coding_gene	Scaffold-70	1694483	1733407	+	3894	-	- && O88942.1 RecName: Full=Nuclear factor of activated T-cells, cytoplasmic 1; Short=NF-ATc1; Short=NFATc1; AltName: Full=NFAT transcription complex cytosolic component; Short=NF-ATc; Short=NFATc && PF00554:Rel homology DNA-binding domain|PF16179:Rel homology dimerisation domain	RHD
Scaffold-46.69	154.869	75.805	99.5908	16.0583	56.4446	44.4182	139.788	57.9127	65.1566	protein_coding_gene	Scaffold-46	1544286	1568518	+	1034	-	- && - && -	-
Scaffold-72.350	80.5332	86.7701	75.0162	47.3681	93.7823	83.2758	76.491	77.8781	87.0722	protein_coding_gene	Scaffold-72	6494804	6498908	+	651	-	- && - && -	-
Scaffold-122.114	59.7126	81.869	66.5848	167.524	68.3729	76.767	62.9193	67.9942	54.6131	protein_coding_gene	Scaffold-122	2485701	2487191	-	657	-	- && Q642A5.1 RecName: Full=DNA polymerase epsilon subunit 3; AltName: Full=DNA polymerase II subunit 3; AltName: Full=DNA polymerase epsilon subunit p17 && PF00808:Histone-like transcription factor (CBF/NF-Y) and archaeal histone	-
Scaffold-41.41	72.9505	69.5731	88.2434	99.4343	73.1056	78.3167	77.2374	77.2302	70.2281	protein_coding_gene	Scaffold-41	1463060	1469827	+	924	-	- && Q96KR6.2 RecName: Full=Protein FAM210B && PF06916:Protein of unknown function (DUF1279)	-
Scaffold-60.45	84.4812	60.4205	60.9806	126.28	68.9465	84.1325	79.3237	69.2547	70.3626	protein_coding_gene	Scaffold-60	1008859	1014593	+	1797	-	- && - && PF00118:TCP-1/cpn60 chaperonin family	-
Scaffold-56.79	81.4901	59.4513	86.7504	109.002	65.4357	78.3832	91.3958	70.2344	59.7563	protein_coding_gene	Scaffold-56	1931876	1944685	+	1046	-	- && - && PF09805:Nucleolar protein 12 (25kDa)	-
Scaffold-594.15	80.1829	59.1593	75.6542	59.1314	69.6971	90.7275	110.46	90.3559	65.7788	protein_coding_gene	Scaffold-594	157590	166273	-	1281	-	- && Q2F5R8.1 RecName: Full=Eukaryotic translation initiation factor 3 subunit E; Short=eIF3e; AltName: Full=Eukaryotic translation initiation factor 3 subunit 6 && PF01399:PCI domain|PF09440:eIF3 subunit 6 N terminal domain	-
Scaffold-72.506	88.9641	78.7547	56.9384	87.3593	73.5739	66.9264	91.3842	79.2174	76.7326	protein_coding_gene	Scaffold-72	9964750	9995540	+	1955	-	- && Q8BN82.2 RecName: Full=Sialin; AltName: Full=H(+)/nitrate cotransporter; AltName: Full=H(+)/sialic acid cotransporter; Short=AST; AltName: Full=Solute carrier family 17 member 5; AltName: Full=Vesicular H(+)/Aspartate-glutamate cotransporter && PF07690:Major Facilitator Superfamily	MFS_1
Scaffold-92.90	67.1004	42.4411	75.7551	75.6305	55.7899	148.695	45.449	120.688	67.7423	protein_coding_gene	Scaffold-92	1415634	1431792	+	1265	-	- && - && -	-
Scaffold-85.9	59.8348	82.6305	89.7815	104.307	66.0265	81.1635	75.2686	68.6709	71.0336	protein_coding_gene	Scaffold-85	223212	227637	+	755	-	- && - && PF05497:Destabilase	-
Scaffold-80.94	70.517	63.3152	57.0453	159.33	63.5551	80.4913	72.8298	69.8146	61.6469	EVM%20prediction%20Scaffold-80.94	Scaffold-80	1450113	1475928	+	2517	-	- && Q6P6E6.2 RecName: Full=Myeloma-overexpressed gene 2 protein homolog && PF15004:Myeloma-overexpressed-like	-
Scaffold-74.10	66.1075	85.6506	4.38528	0	239.924	140.992	19.8349	19.817	121.44	protein_coding_gene	Scaffold-74	115793	121684	-	642	-	- && - && -	-
Scaffold-103.73	179.506	106.692	3.23232	1.18012	148.806	170.011	15.8383	3.80727	67.8913	protein_coding_gene	Scaffold-103	1090741	1094428	-	402	-	- && - && -	-
Scaffold-274.8	72.1039	87.6742	92.9978	75.9611	79.0645	79.0546	60.6835	77.1593	71.8421	protein_coding_gene	Scaffold-274	75113	95131	+	1934	-	- && Q8QZT1.1 RecName: Full=Acetyl-CoA acetyltransferase, mitochondrial; AltName: Full=Acetoacetyl-CoA thiolase; Flags: Precursor && PF02803:Thiolase, C-terminal domain|PF05768:Glutaredoxin-like domain (DUF836)|PF00108:Thiolase, N-terminal domain	Thiolase_N
Scaffold-72.195	60.4003	71.688	64.9867	84.1403	107.173	88.6007	68.963	75.6302	74.0212	protein_coding_gene	Scaffold-72	3165383	3193388	+	2541	-	- && Q9W3K5.1 RecName: Full=Glutamate--cysteine ligase; AltName: Full=Gamma-ECS; Short=GCS; AltName: Full=Gamma-glutamylcysteine synthetase && PF03074:Glutamate-cysteine ligase	GCS
Scaffold-12.99	79.6833	84.5133	67.2659	68.0546	88.6398	81.2511	78.3156	72.1908	72.0965	protein_coding_gene	Scaffold-12	2279884	2289720	-	2405	-	- && O95433.1 RecName: Full=Activator of 90 kDa heat shock protein ATPase homolog 1; Short=AHA1; AltName: Full=p38 && PF09229:Activator of Hsp90 ATPase, N-terminal|PF08327:Activator of Hsp90 ATPase homolog 1-like protein	-
Scaffold-449.6	72.6914	74.0953	71.9801	88.4075	67.1041	87.2581	78.446	77.5626	73.859	protein_coding_gene	Scaffold-449	177721	196549	-	2252	-	- && P44573.1 RecName: Full=Oligopeptidase A && PF01432:Peptidase family M3	Peptidase_M3
Scaffold-85.81	82.0773	74.6271	64.4761	115.336	85.9584	70.3421	68.1363	66.588	63.2559	protein_coding_gene	Scaffold-85	1556793	1564250	-	1053	-	- && Q6P5I8.1 RecName: Full=Protein YIPF5; AltName: Full=YIP1 family member 5 && -	-
Scaffold-28.130	67.7231	62.7725	60.1571	143.076	69.5448	81.8619	70.2248	65.7963	69.3407	protein_coding_gene	Scaffold-28	2354823	2357093	-	567	-	- && P83871.1 RecName: Full=PHD finger-like domain-containing protein 5A; Short=PHD finger-like domain protein 5A; AltName: Full=Splicing factor 3B-associated 14 kDa protein; Short=SF3b14b >P83870.1 RecName: Full=PHD finger-like domain-containing protein 5A; Short=PHD finger-like domain protein 5A; AltName: Full=Splicing factor 3B-associated 14 kDa protein; Short=SF3b14b >Q7RTV0.1 RecName: Full=P…	-
Scaffold-8.204	68.3008	79.2753	84.8498	64.2775	84.4558	80.4726	75.7006	70.7466	80.9496	protein_coding_gene	Scaffold-8	3808042	3842206	+	2999	-	- && Q9VAS7.1 RecName: Full=Innexin inx3; Short=Innexin-3 && PF00876:Innexin	-
Scaffold-103.12	64.4208	75.5122	73.3821	110.793	68.2606	82.023	72.4037	76.425	65.6801	protein_coding_gene	Scaffold-103	123353	147411	+	2268	-	- && Q9HD33.2 RecName: Full=39S ribosomal protein L47, mitochondrial; Short=L47mt; Short=MRP-L47; AltName: Full=Nasopharyngeal carcinoma metastasis-related protein 1; Flags: Precursor && PF06984:Mitochondrial 39-S ribosomal protein L47 (MRP-L47)	-
Scaffold-270.3	71.8755	73.2783	77.334	63.7759	83.128	83.8875	76.4004	81.9708	76.6868	protein_coding_gene	Scaffold-270	98671	145981	-	5703	-	- && P45953.1 RecName: Full=Very long-chain specific acyl-CoA dehydrogenase, mitochondrial; Short=VLCAD; Flags: Precursor && PF02771:Acyl-CoA dehydrogenase, N-terminal domain|PF02770:Acyl-CoA dehydrogenase, middle domain|PF05118:Aspartyl/Asparaginyl beta-hydroxylase|PF00441:Acyl-CoA dehydrogenase, C-terminal domain	-
Scaffold-99.51	107.544	43.841	82.0371	111.869	83.7859	83.911	67.7713	58.7529	48.0389	protein_coding_gene	Scaffold-99	953290	1000294	+	2789	-	- && P59926.1 RecName: Full=Synaptotagmin-15; AltName: Full=Synaptotagmin XV; Short=SytXV && PF00168:C2 domain|PF03723:Hemocyanin, ig-like domain|PF00372:Hemocyanin, copper containing domain	C2
Scaffold-160.21	73.637	79.5896	62.7024	100.883	71.2204	73.7333	84.0449	72.4996	68.3707	protein_coding_gene	Scaffold-160	395979	405198	-	917	-	- && Q6PHE8.1 RecName: Full=Coiled-coil domain-containing protein 124 && PF06244:Protein of unknown function (DUF1014)	-
Scaffold-20.385	72.0236	83.3755	94.6486	64.0626	95.8733	75.5855	62.2549	65.1101	73.138	EVM%20prediction%20Scaffold-20.385	Scaffold-20	9192108	9195540	-	548	-	- && Q62867.1 RecName: Full=Gamma-glutamyl hydrolase; AltName: Full=Conjugase; AltName: Full=GH; AltName: Full=Gamma-Glu-X carboxypeptidase; Flags: Precursor && PF07722:Peptidase C26	-
Scaffold-27.14	78.3839	57.8991	68.3014	112.607	57.9809	68.8116	82.0807	66.8553	92.3865	protein_coding_gene	Scaffold-27	346410	356902	-	910	-	- && - && -	-
Scaffold-60.59	68.5944	59.9124	60.4696	143.467	70.4557	86.5665	76.3412	62.8253	56.6546	protein_coding_gene	Scaffold-60	1318688	1322687	+	539	-	- && Q2TBG7.1 RecName: Full=Iron-sulfur cluster assembly 2 homolog, mitochondrial; AltName: Full=HESB-like domain-containing protein 1; Flags: Precursor && PF01521:Iron-sulphur cluster biosynthesis	-
Scaffold-185.46	71.679	60.733	57.0812	144.362	58.419	76.7614	87.6123	62.329	65.2017	protein_coding_gene	Scaffold-185	689511	693552	-	884	-	- && - && -	-
Scaffold-251.201	91.6248	107.02	75.5287	82.6722	46.3408	62.3433	88.992	68.176	59.9059	protein_coding_gene	Scaffold-251	2491276	2494821	+	1448	-	- && Q6P828.1 RecName: Full=Lipopolysaccharide-induced tumor necrosis factor-alpha factor homolog; Short=LPS-induced TNF-alpha factor homolog && PF10601:LITAF-like zinc ribbon domain	-
Scaffold-471.8	61.704	59.6895	78.5226	186.915	46.078	68.6614	59.912	74.2525	46.7835	protein_coding_gene	Scaffold-471	150649	159477	+	1077	-	- && - && -	-
Scaffold-57.6	70.0606	81.7682	81.1493	102.183	74.3351	76.3179	65.1538	63.032	68.3049	protein_coding_gene	Scaffold-57	142994	162256	-	862	-	- && Q17QI2.1 RecName: Full=RNA polymerase II subunit A C-terminal domain phosphatase SSU72; Short=CTD phosphatase SSU72 && PF04722:Ssu72-like protein	-
Scaffold-73.7	76.2066	120.486	73.7751	11.5851	80.0161	59.7974	79.7136	85.4963	94.0294	protein_coding_gene	Scaffold-73	92942	93214	-	273	-	- && P0DKM0.1 RecName: Full=Cytochrome c oxidase assembly factor 3, mitochondrial; AltName: Full=Coiled-coil domain-containing protein 56 homolog && PF09813:Coiled-coil domain-containing protein 56	-
Scaffold-290.10	82.1125	55.5921	71.4714	91.0729	86.0845	75.9582	68.2247	86.8827	63.2673	protein_coding_gene	Scaffold-290	158948	200903	+	4077	-	- && B0W6N3.2 RecName: Full=Eukaryotic translation initiation factor 3 subunit A; Short=eIF3a; AltName: Full=Eukaryotic translation initiation factor 3 subunit 10 && PF01399:PCI domain	-
Scaffold-289.3	71.6035	58.2962	60.7465	140.211	70.5925	93.5052	70.4736	54.8585	60.2267	protein_coding_gene	Scaffold-289	56922	69488	-	1041	-	- && Q9Y4Y9.3 RecName: Full=U6 snRNA-associated Sm-like protein LSm5 >P62322.2 RecName: Full=U6 snRNA-associated Sm-like protein LSm5 >Q5R628.3 RecName: Full=U6 snRNA-associated Sm-like protein LSm5 >Q2HJH0.3 RecName: Full=U6 snRNA-associated Sm-like protein LSm5 && PF01423:LSM domain	LSM
Scaffold-38.28	92.5841	70.0752	85.9699	68.1424	78.7213	56.446	72.4242	80.6714	74.4625	protein_coding_gene	Scaffold-38	299131	338185	+	3300	-	- && Q2HJ95.1 RecName: Full=Palmitoyltransferase ZDHHC6; AltName: Full=Zinc finger DHHC domain-containing protein 6; Short=DHHC-6 && PF12248:Farnesoic acid 0-methyl transferase|PF01529:DHHC palmitoyltransferase|PF11901:Protein of unknown function (DUF3421)|PF00314:Thaumatin family	Thaumatin
Scaffold-81.30	74.6565	53.9128	35.4783	138.707	48.5558	138.873	78.1644	63.663	47.2253	protein_coding_gene	Scaffold-81	698846	699548	+	293	-	- && - && -	-
Scaffold-229.6	80.5545	57.9083	73.6454	122.951	61.6632	72.5301	85.5364	65.5415	58.7395	protein_coding_gene	Scaffold-229	109068	127038	-	1982	-	- && P85971.1 RecName: Full=6-phosphogluconolactonase; Short=6PGL && PF01182:Glucosamine-6-phosphate isomerases/6-phosphogluconolactonase	-
Scaffold-93.17	61.9099	79.8634	77.8538	60.2607	80.8447	77.899	79.5247	79.6632	81.0929	protein_coding_gene	Scaffold-93	576173	596905	-	3708	-	- && P08962.2 RecName: Full=CD63 antigen; AltName: Full=Granulophysin; AltName: Full=Lysosomal-associated membrane protein 3; Short=LAMP-3; AltName: Full=Melanoma-associated antigen ME491; AltName: Full=OMA81H; AltName: Full=Ocular melanoma-associated antigen; AltName: Full=Tetraspanin-30; Short=Tspan-30; AltName: CD_antigen=CD63 && PF00335:Tetraspanin family|PF01443:Viral (Superfamily 1) RNA hel…	Tetraspannin
Scaffold-26.139	77.1421	75.4057	74.2537	117.077	60.5028	59.7776	79.8712	70.1573	64.3216	protein_coding_gene	Scaffold-26	2700443	2779261	-	2307	-	- && - && PF00057:Low-density lipoprotein receptor domain class A|PF01390:SEA domain	Ldl_recept_a
Scaffold-51.31	60.858	46.9815	69.8123	138.751	59.7623	78.5439	90.1758	77.4166	55.7835	protein_coding_gene	Scaffold-51	712328	733509	-	881	-	- && - && -	-
Scaffold-28.129	72.8341	64.8743	71.0716	100.744	66.454	78.4073	77.8296	80.6643	64.4296	protein_coding_gene	Scaffold-28	2278167	2345422	+	6431	-	- && Q99MN1.1 RecName: Full=Lysine--tRNA ligase; AltName: Full=Lysyl-tRNA synthetase; Short=LysRS && PF00152:tRNA synthetases class II (D, K and N)|PF00233:3'5'-cyclic nucleotide phosphodiesterase|PF01336:OB-fold nucleic acid binding domain	tRNA-synt_2
Scaffold-132.13	69.4992	63.224	72.931	116.268	70.9154	76.4747	73.1484	68.4267	65.8558	protein_coding_gene	Scaffold-132	325402	338939	+	1507	-	- && Q95SK3.1 RecName: Full=CDK5RAP3-like protein && PF05600:Protein of unknown function (DUF773)	-
Scaffold-72.214	72.6187	60.1141	53.3642	151.579	66.6418	69.9479	70.9313	58.4321	73.0547	protein_coding_gene	Scaffold-72	3406790	3414401	-	627	-	- && Q9VD92.1 RecName: Full=Protein archease-like && PF01951:Archease protein family (MTH1598/TM1083)	-
Scaffold-11.104	93.1728	73.4795	64.7936	92.0534	72.1316	56.2578	101.056	66.5716	56.4808	protein_coding_gene	Scaffold-11	2254619	2259208	-	615	-	- && - && -	-
Scaffold-158.11	74.2931	69.302	66.4476	107.119	74.9344	78.5375	76.9672	62.477	64.6949	protein_coding_gene	Scaffold-158	78248	92534	-	1773	-	- && Q6P0H6.1 RecName: Full=COP9 signalosome complex subunit 4; Short=Signalosome subunit 4 && PF01399:PCI domain	-
Scaffold-108.60	60.3544	46.9867	30.3222	25.8407	118.046	189.119	62.0481	48.7641	93.0286	protein_coding_gene	Scaffold-108	943328	949580	+	1432	-	- && Q9V7U0.1 RecName: Full=Pro-resilin; Flags: Precursor && PF00379:Insect cuticle protein	Chitin_bind_4
Scaffold-155.34	79.6506	52.6093	77.7928	124.425	66.8891	67.7554	72.3043	79.1815	52.5972	protein_coding_gene	Scaffold-155	826077	831063	+	2003	-	- && - && -	-
Scaffold-39.1	77.3959	80.6455	76.4422	65.1363	74.468	75.4094	72.1966	83.0712	67.6947	protein_coding_gene	Scaffold-39	15	1506	-	874	-	- && Q5SRE7.2 RecName: Full=Phytanoyl-CoA dioxygenase domain-containing protein 1 && PF05721:Phytanoyl-CoA dioxygenase (PhyH)	PhyH
Scaffold-24.185	66.3112	73.3504	60.9431	73.4489	71.8134	89.5548	82.7503	74.0266	79.8085	protein_coding_gene	Scaffold-24	5073418	5097183	-	1393	-	- && Q92947.1 RecName: Full=Glutaryl-CoA dehydrogenase, mitochondrial; Short=GCD; Flags: Precursor && PF02770:Acyl-CoA dehydrogenase, middle domain|PF02771:Acyl-CoA dehydrogenase, N-terminal domain|PF00441:Acyl-CoA dehydrogenase, C-terminal domain	-
Scaffold-165.49	72.9577	61.249	59.4425	130.807	62.2147	72.2221	77.1323	68.327	64.4354	protein_coding_gene	Scaffold-165	874839	888623	+	1869	-	- && O15213.3 RecName: Full=WD repeat-containing protein 46; AltName: Full=WD repeat-containing protein BING4 && PF08149:BING4CT (NUC141) domain	-
Scaffold-9.295	79.7125	64.0349	64.1861	120.033	68.7313	73.6208	72.4246	60.0162	64.7938	protein_coding_gene	Scaffold-9	5280869	5284606	+	1299	-	- && Q5F349.1 RecName: Full=Protein O-mannose kinase; Short=POMK; AltName: Full=Protein kinase-like protein SgK196; AltName: Full=Sugen kinase 196 && PF07714:Protein tyrosine kinase|PF07985:SRR1	SRR1
Scaffold-13.17	285.83	1.21267	0.437801	182.859	9.05842	0.82093	6.01941	0	181.081	protein_coding_gene	Scaffold-13	213354	215232	+	742	-	- && - && -	-
Scaffold-325.12	77.0848	79.2288	89.2851	33.7012	78.4587	72.3222	72.3579	87.6168	76.8547	protein_coding_gene	Scaffold-325	248223	286314	-	2867	-	- && Q60HE2.1 RecName: Full=2-oxoglutarate dehydrogenase, mitochondrial; AltName: Full=2-oxoglutarate dehydrogenase complex component E1; Short=OGDC-E1; AltName: Full=Alpha-ketoglutarate dehydrogenase; Flags: Precursor && PF16870:2-oxoglutarate dehydrogenase C-terminal|PF02779:Transketolase, pyrimidine binding domain|PF00676:Dehydrogenase E1 component	-
Scaffold-45.38	75.8532	54.7665	66.5029	117.413	68.5023	74.0659	82.6675	63.0664	62.9147	protein_coding_gene	Scaffold-45	789858	803720	-	1130	-	- && - && -	-
Scaffold-456.5	55.4403	63.928	68.2552	113.618	90.4797	74.5794	72.8968	62.9032	62.7518	protein_coding_gene	Scaffold-456	104124	108817	-	1872	-	- && C3ZDX5.1 RecName: Full=Ubiquitin-fold modifier-conjugating enzyme 1; AltName: Full=Ufm1-conjugating enzyme 1 && PF00078:Reverse transcriptase (RNA-dependent DNA polymerase)|PF08694:Ubiquitin-fold modifier-conjugating enzyme 1	RVT_1
Scaffold-33.41	77.4868	55.7586	57.7648	118.564	63.3454	87.0861	76.411	62.0708	66.2718	protein_coding_gene	Scaffold-33	512289	520940	-	1031	-	- && Q6DEY1.1 RecName: Full=Survival of motor neuron-related-splicing factor 30; AltName: Full=Survival motor neuron domain-containing protein 1 && PF06003:Survival motor neuron protein (SMN)	-
Scaffold-207.9	106.885	41.2751	26.1601	135.166	35.2854	99.2863	60.1565	82.9326	77.0425	protein_coding_gene	Scaffold-207	211342	217123	-	654	-	- && - && -	-
Scaffold-925.2	149.129	69.8716	33.8275	8.14874	103.544	100.835	55.0897	45.2873	97.7327	protein_coding_gene	Scaffold-925	54977	59363	+	621	-	- && - && PF00059:Lectin C-type domain	Lectin_C
Scaffold-20.87	55.805	62.4277	70.3641	98.989	71.0231	93.501	68.4027	63.7966	79.0283	protein_coding_gene	Scaffold-20	2534359	2572893	-	3858	-	- && P16930.2 RecName: Full=Fumarylacetoacetase; Short=FAA; AltName: Full=Beta-diketonase; AltName: Full=Fumarylacetoacetate hydrolase && PF01557:Fumarylacetoacetate (FAA) hydrolase family|PF00069:Protein kinase domain|PF09298:Fumarylacetoacetase N-terminal	Pkinase
Scaffold-53.46	86.8339	67.4712	68.6382	81.9487	71.825	72.8959	86.375	67.518	59.5336	protein_coding_gene	Scaffold-53	696716	713553	+	1098	-	- && - && -	-
Scaffold-72.535	57.8886	66.8693	51.5151	132.764	80.2549	85.0054	60.0142	63.9801	62.0458	protein_coding_gene	Scaffold-72	10720868	10725476	-	1072	-	- && O44437.1 RecName: Full=Small nuclear ribonucleoprotein Sm D3; Short=Sm-D3; AltName: Full=snRNP core protein D3 && PF01423:LSM domain	LSM
Scaffold-251.202	69.2062	78.7826	69.9741	84.2963	64.6019	79.3903	68.9889	70.3577	74.4167	protein_coding_gene	Scaffold-251	2496072	2499174	-	1467	-	- && Q92552.3 RecName: Full=28S ribosomal protein S27, mitochondrial; Short=MRP-S27; Short=S27mt && PF10037:Mitochondrial 28S ribosomal protein S27	-
Scaffold-243.18	62.6067	70.6259	67.227	105.88	66.2855	81.2912	73.8784	69.2289	62.7642	protein_coding_gene	Scaffold-243	419091	435253	+	2197	-	- && A1A4P5.1 RecName: Full=Prefoldin subunit 2 && PF01920:Prefoldin subunit	-
Scaffold-283.8	75.8331	63.6574	61.7856	90.6624	69.0609	92.4949	70.2651	69.0924	66.8105	protein_coding_gene	Scaffold-283	107088	127157	-	2571	-	- && P28075.3 RecName: Full=Proteasome subunit beta type-5; AltName: Full=Macropain epsilon chain; AltName: Full=Multicatalytic endopeptidase complex epsilon chain; AltName: Full=Proteasome chain 6; AltName: Full=Proteasome epsilon chain; AltName: Full=Proteasome subunit X; Flags: Precursor && PF00227:Proteasome subunit	Proteasome
Scaffold-14.110	70.2956	87.3717	82.8598	19.2514	83.2863	70.9769	71.4789	83.7352	90.3105	protein_coding_gene	Scaffold-14	2277389	2282508	-	690	-	- && Q5RJL2.1 RecName: Full=Methyltransferase-like protein 23 && PF10294:Lysine methyltransferase	-
Scaffold-64.48	69.7574	56.351	57.0945	125.725	64.4361	89.8089	68.6414	49.9634	77.2885	protein_coding_gene	Scaffold-64	1287637	1290478	-	605	-	- && - && PF09803:Uncharacterized conserved protein (DUF2346)	-
Scaffold-248.22	186.618	28.482	0	0.367759	207.893	115.451	0.883998	1.89091	117.287	protein_coding_gene	Scaffold-248	290499	293485	+	860	-	- && P80233.1 RecName: Full=Cuticle protein 67, isoform B; AltName: Full=LM-ACP 67B; Short=LM-67B [Locusta migratoria] && PF11018:Pupal cuticle protein C1	-
Scaffold-93.68	72.6244	64.3429	66.0548	90.8854	78.9771	70.6537	71.5104	73.1917	68.6497	protein_coding_gene	Scaffold-93	1439441	1454266	+	2295	-	- && P43686.2 RecName: Full=26S protease regulatory subunit 6B; AltName: Full=26S proteasome AAA-ATPase subunit RPT3; AltName: Full=MB67-interacting protein; AltName: Full=MIP224; AltName: Full=Proteasome 26S subunit ATPase 4; AltName: Full=Tat-binding protein 7; Short=TBP-7 >Q4R7L3.1 RecName: Full=26S protease regulatory subunit 6B; AltName: Full=26S proteasome AAA-ATPase subunit RPT3; AltName: …	AAA
Scaffold-500.15	70.4628	64.4502	61.9604	74.6375	76.5019	80.4773	72.0841	73.6935	81.9069	protein_coding_gene	Scaffold-500	263013	275068	+	2195	-	- && P48605.2 RecName: Full=T-complex protein 1 subunit gamma; Short=TCP-1-gamma; AltName: Full=CCT-gamma && PF00118:TCP-1/cpn60 chaperonin family	-
Scaffold-1.99	69.9683	77.8001	70.316	31.3067	82.8312	73.8075	75.3098	81.7398	92.7532	protein_coding_gene	Scaffold-1	1798405	1807801	+	1677	-	- && Q3ZBH0.3 RecName: Full=T-complex protein 1 subunit beta; Short=TCP-1-beta; AltName: Full=CCT-beta && PF00118:TCP-1/cpn60 chaperonin family	-
Scaffold-29.28	78.3839	62.6233	74.6405	83.2547	60.7674	74.7264	83.7326	68.8048	67.8766	protein_coding_gene	Scaffold-29	496004	504009	-	1001	-	- && - && PF16094:Proteasome assembly chaperone 4	-
Scaffold-517.2	50.593	42.128	96.9999	86.8543	174.96	63.9819	26.0425	48.0845	61.9187	protein_coding_gene	Scaffold-517	19005	26821	-	2620	-	- && - && -	-
Scaffold-655.10	87.1453	50.5786	55.2593	129.681	63.2811	71.694	69.0998	55.5887	69.1076	protein_coding_gene	Scaffold-655	131522	148765	-	678	-	- && Q9BV81.1 RecName: Full=ER membrane protein complex subunit 6; AltName: Full=Transmembrane protein 93 >Q9CQW0.1 RecName: Full=ER membrane protein complex subunit 6; AltName: Full=Transmembrane protein 93 && PF07019:Rab5-interacting protein (Rab5ip)	Rab5ip
Scaffold-55.107	60.7644	64.1664	62.5302	131.839	61.2732	71.1646	76.6247	62.8845	59.6741	protein_coding_gene	Scaffold-55	1958988	2000014	-	4492	-	- && Q9DBE9.1 RecName: Full=pre-rRNA processing protein FTSJ3; AltName: Full=2'-O-ribose RNA methyltransferase SPB1 homolog; AltName: Full=Protein ftsJ homolog 3; AltName: Full=Putative rRNA methyltransferase 3 && PF11861:Domain of unknown function (DUF3381)|PF07780:Spb1 C-terminal domain|PF01728:FtsJ-like methyltransferase	-
Scaffold-65.27	65.7257	77.901	92.7201	65.1355	71.5562	74.7995	73.7318	60.7343	68.5755	protein_coding_gene	Scaffold-65	603480	620144	+	1816	-	- && P17276.3 RecName: Full=Protein henna; AltName: Full=Phe-4-monooxygenase; AltName: Full=Phenylalanine-4-hydroxylase; Short=PAH; AltName: Full=Tryptophan 5-hydroxylase; Short=TRH; AltName: Full=Tryptophan 5-monooxygenase && PF00351:Biopterin-dependent aromatic amino acid hydroxylase	-
Scaffold-149.62	85.331	70.2554	53.4345	66.4417	81.3823	79.9394	74.2868	62.4161	77.2494	protein_coding_gene	Scaffold-149	935513	938499	-	2987	-	- && Q6NYT3.2 RecName: Full=Immediate early response gene 5-like protein && PF05760:Immediate early response protein (IER)	-
Scaffold-71.24	56.0814	66.5612	77.74	27.0723	66.97	80.9083	69.5164	93.7862	110.935	protein_coding_gene	Scaffold-71	374081	405495	-	1840	-	- && - && PF07690:Major Facilitator Superfamily	MFS_1
Scaffold-72.344	71.0246	63.1482	75.5203	108.668	72.7667	73.7203	67.658	57.0676	59.8666	protein_coding_gene	Scaffold-72	6403449	6419272	-	1170	-	- && Q8IUH2.1 RecName: Full=Protein CREG2; Flags: Precursor && PF13883:Pyridoxamine 5'-phosphate oxidase	-
Scaffold-374.22	71.5974	76.3114	63.3829	68.2457	84.8737	80.7269	73.759	66.0054	63.6953	protein_coding_gene	Scaffold-374	324423	331031	+	1242	-	- && Q9CW42.2 RecName: Full=Mitochondrial amidoxime-reducing component 1; Short=mARC1; AltName: Full=Molybdenum cofactor sulfurase C-terminal domain-containing protein 1; Short=MOSC domain-containing protein 1; Short=Moco sulfurase C-terminal domain-containing protein 1 && PF03476:MOSC N-terminal beta barrel domain|PF03473:MOSC domain	MOSC
Scaffold-96.127	77.2055	68.6836	72.326	69.0394	84.52	84.4227	54.3175	70.1942	66.1292	protein_coding_gene	Scaffold-96	2841998	2851120	+	1837	-	- && P42125.2 RecName: Full=Enoyl-CoA delta isomerase 1, mitochondrial; AltName: Full=3,2-trans-enoyl-CoA isomerase; AltName: Full=Delta(3),Delta(2)-enoyl-CoA isomerase; Short=D3,D2-enoyl-CoA isomerase; AltName: Full=Dodecenoyl-CoA isomerase; Flags: Precursor && PF00378:Enoyl-CoA hydratase/isomerase	ECH
Scaffold-465.62	30.261	61.1984	47.5788	150.948	45.8274	119.611	63.3532	65.8009	61.8834	protein_coding_gene	Scaffold-465	551303	551632	+	330	-	- && - && -	-
Scaffold-72.364	54.4038	82.6086	86.8709	48.0217	71.5172	66.4192	70.3328	85.3894	80.3317	protein_coding_gene	Scaffold-72	6759205	6764328	+	708	-	- && Q9Z0V7.1 RecName: Full=Mitochondrial import inner membrane translocase subunit Tim17-B && PF02466:Tim17/Tim22/Tim23/Pmp24 family	-
Scaffold-92.51	63.0436	42.7177	78.0948	86.7354	32.5884	111.858	79.1915	42.6112	108.441	protein_coding_gene	Scaffold-92	804197	809548	+	330	-	- && - && -	-
Scaffold-58.56	83.3083	66.4723	65.1445	79.6713	72.7719	70.7236	74.4379	65.1022	67.4715	protein_coding_gene	Scaffold-58	1154256	1167092	+	2229	-	- && Q05975.1 RecName: Full=Ras-related protein Rab-2 && PF00071:Ras family	Ras
Scaffold-240.40	64.8065	58.4091	61.4141	115.202	73.7262	84.0746	70.5125	55.8853	60.5664	protein_coding_gene	Scaffold-240	605793	619207	-	1407	-	- && Q6PUR6.1 RecName: Full=GPN-loop GTPase 2; AltName: Full=ATP-binding domain 1 family member B && PF10178:Proteasome assembly chaperone 3|PF03029:Conserved hypothetical ATP binding protein	-
Scaffold-368.3	77.4211	60.9344	64.1019	62.4693	77.1893	80.2319	79.9602	75.5221	66.4547	protein_coding_gene	Scaffold-368	23559	37458	+	1772	-	- && Q7TNK0.1 RecName: Full=Serine incorporator 1; AltName: Full=Tumor differentially expressed protein 1-like; AltName: Full=Tumor differentially expressed protein 2 && PF03348:Serine incorporator (Serinc)	TMS_TDE
Scaffold-324.8	71.0913	78.2371	79.366	74.0534	80.3976	77.7316	59.7732	62.3121	61.2976	protein_coding_gene	Scaffold-324	181936	222244	-	2097	-	- && Q13454.1 RecName: Full=Tumor suppressor candidate 3; AltName: Full=Magnesium uptake/transporter TUSC3; AltName: Full=Protein N33; Flags: Precursor && PF04756:OST3 / OST6 family	-
Scaffold-67.6	620.332	0	0	0	1.80925	18.692	0.639501	0.772472	1.54123	protein_coding_gene	Scaffold-67	79982	81510	+	743	-	- && - && -	-
Scaffold-248.6	89.4465	60.3402	62.5598	95.3247	60.5929	71.0128	93.6292	57.733	52.3199	protein_coding_gene	Scaffold-248	47480	62538	-	1357	-	- && - && -	-
Scaffold-54.76	88.9373	50.9594	66.8737	100.989	66.8872	71.8865	53.1531	71.3048	71.7509	protein_coding_gene	Scaffold-54	1507306	1523795	-	1854	-	- && P29786.2 RecName: Full=Trypsin 3A1; Flags: Precursor && PF00089:Trypsin	Trypsin
Scaffold-289.30	60.686	72.1479	70.2043	118.257	64.5156	68.567	73.9674	56.8438	54.7085	protein_coding_gene	Scaffold-289	525273	532646	-	1146	-	- && B5Y8J2.1 RecName: Full=Ribosome-recycling factor; Short=RRF; AltName: Full=Ribosome-releasing factor && PF01765:Ribosome recycling factor	-
Scaffold-63.49	68.3232	70.2634	75.7446	67.0803	75.5401	73.0156	69.959	63.8766	74.9528	protein_coding_gene	Scaffold-63	961939	970567	-	1827	-	- && Q9XZC0.2 RecName: Full=Alpha-latrocrustotoxin-Lt1a; Short=Alpha-LCT-Lt1a; AltName: Full=Alpha-latrocrustotoxin; Short=Alpha-LCT; AltName: Full=Crusta1; Flags: Precursor && PF12796:Ankyrin repeats (3 copies)	-
Scaffold-314.13	73.6273	61.9191	62.2572	110.415	62.9712	75.931	70.4758	59.055	61.548	protein_coding_gene	Scaffold-314	212807	224829	+	1014	-	- && A8YXY3.2 RecName: Full=15 kDa selenoprotein; Flags: Precursor && PF08806:Sep15/SelM redox domain	-
Scaffold-23.167	67.633	73.849	56.2342	108.171	70.2259	65.2127	76.1836	65.9958	54.3697	protein_coding_gene	Scaffold-23	3556247	3564044	+	1190	-	- && - && PF01847:von Hippel-Lindau disease tumour suppressor protein	-
Scaffold-53.62	81.6281	60.5714	63.0393	101.974	75.3578	63.9671	69.0885	65.9479	56.2199	protein_coding_gene	Scaffold-53	1077738	1098814	-	718	-	- && - && -	-
Scaffold-224.36	35.9481	52.184	45.2424	5.55561	121.58	114.947	104.926	58.2108	97.9421	protein_coding_gene	Scaffold-224	607840	619394	-	797	-	- && Q7M4F2.1 RecName: Full=Endocuticle structural glycoprotein SgAbd-8 && PF00379:Insect cuticle protein	Chitin_bind_4
Scaffold-76.28	55.408	84.6122	73.791	75.7557	64.9129	80.4684	59.0042	62.8789	79.5013	protein_coding_gene	Scaffold-76	576827	617783	-	4392	-	- && Q95M12.1 RecName: Full=Legumain; AltName: Full=Asparaginyl endopeptidase; AltName: Full=Protease, cysteine 1; Flags: Precursor && PF01650:Peptidase C13 family|PF00078:Reverse transcriptase (RNA-dependent DNA polymerase)	RVT_1
Scaffold-472.4	78.8366	53.9384	53.2924	128.903	65.2338	75.535	60.6116	67.8489	50.9082	protein_coding_gene	Scaffold-472	61748	101336	+	3316	-	- && Q9VU68.1 RecName: Full=Actin-interacting protein 1; Short=AIP1; AltName: Full=Protein flare && -	-
Scaffold-9.66	73.3841	46.5945	55.8124	107.946	75.7765	88.6748	56.0695	74.9418	55.8134	protein_coding_gene	Scaffold-9	949189	964051	+	1944	-	- && Q27294.2 RecName: Full=RNA-binding protein cabeza; AltName: Full=P19; AltName: Full=Sarcoma-associated RNA-binding fly homolog && PF00641:Zn-finger in Ran binding protein and others|PF00076:RNA recognition motif. (a.k.a. RRM, RBD, or RNP domain)	RRM_1
Scaffold-5.87	68.39	63.0078	67.4685	102.441	62.351	72.9617	80.3054	60.1803	57.4139	protein_coding_gene	Scaffold-5	1739477	1746500	-	1820	-	- && Q9NP81.1 RecName: Full=Serine--tRNA ligase, mitochondrial; AltName: Full=SerRSmt; AltName: Full=Seryl-tRNA synthetase; Short=SerRS; AltName: Full=Seryl-tRNA(Ser/Sec) synthetase; Flags: Precursor && -	-
Scaffold-119.29	62.0549	65.9427	60.9762	123.369	60.8576	71.886	75.4847	51.1532	62.2648	protein_coding_gene	Scaffold-119	602787	617554	-	705	-	- && O88738.2 RecName: Full=Baculoviral IAP repeat-containing protein 6; AltName: Full=BIR repeat-containing ubiquitin-conjugating enzyme; Short=BRUCE; AltName: Full=RING-type E3 ubiquitin transferase BIRC6; AltName: Full=Ubiquitin-conjugating BIR domain enzyme apollon; Short=APOLLON && PF00653:Inhibitor of Apoptosis domain	BIR
Scaffold-251.203	66.8639	62.1239	59.2797	107.109	78.5612	67.1808	71.7708	61.9243	58.4387	protein_coding_gene	Scaffold-251	2500446	2508679	-	1001	-	- && B5X8M4.1 RecName: Full=Lys-63-specific deubiquitinase BRCC36; AltName: Full=BRCA1-A complex subunit BRCC36; AltName: Full=BRCA1/BRCA2-containing complex subunit 3; AltName: Full=BRCA1/BRCA2-containing complex subunit 36; AltName: Full=BRISC complex subunit BRCC36 && PF01398:JAB1/Mov34/MPN/PAD-1 ubiquitin protease	Mov34
Scaffold-12.168	63.8568	55.4161	43.9319	195.186	50.8902	51.8631	76.8384	45.6424	49.0771	protein_coding_gene	Scaffold-12	3902352	3904205	-	350	-	- && Q9Y2Y1.2 RecName: Full=DNA-directed RNA polymerase III subunit RPC10; Short=RNA polymerase III subunit C10; AltName: Full=DNA-directed RNA polymerase III subunit K; AltName: Full=RNA polymerase III 12.5 kDa subunit; Short=RPC12.5; AltName: Full=RNA polymerase III subunit C11; Short=HsC11p; Short=RPC11; Short=hRPC11 && PF02150:RNA polymerases M/15 Kd subunit|PF01096:Transcription factor S-II …	-
Scaffold-329.11	71.7369	56.3112	63.2929	98.6016	60.3147	70.9211	92.5586	64.1111	54.7637	protein_coding_gene	Scaffold-329	257662	278065	-	1692	-	- && A6H630.1 RecName: Full=Protein-glutamate O-methyltransferase; AltName: Full=Acidic residue methyltransferase 1 && PF01937:Protein of unknown function DUF89	DUF89
Scaffold-3.40	71.2284	55.8893	69.121	113.189	63.0986	65.9747	71.0704	59.5264	63.2129	protein_coding_gene	Scaffold-3	716701	718818	+	2118	-	- && - && PF15454:Late endosomal/lysosomal adaptor and MAPK and MTOR activator	-
Scaffold-87.37	65.7147	58.529	59.1979	109.387	67.4517	74.7421	74.321	61.0844	61.5896	protein_coding_gene	Scaffold-87	825512	835967	+	1317	-	- && Q9H8E8.3 RecName: Full=Cysteine-rich protein 2-binding protein; Short=CSRP2-binding protein; AltName: Full=ADA2A-containing complex subunit 2; Short=ATAC2; AltName: Full=CRP2-binding partner; Short=CRP2BP; AltName: Full=Lysine acetyltransferase 14 && PF13508:Acetyltransferase (GNAT) domain	-
Scaffold-233.27	68.2093	56.5007	58.8087	117.088	65.3465	64.1803	72.3647	69.7275	57.4028	protein_coding_gene	Scaffold-233	559654	571456	-	1044	-	- && P52432.3 RecName: Full=DNA-directed RNA polymerases I and III subunit RPAC1; Short=DNA-directed RNA polymerase I subunit C; Short=RNA polymerases I and III subunit AC1; AltName: Full=AC40; AltName: Full=DNA-directed RNA polymerases I and III 40 kDa polypeptide; Short=RPA40; AltName: Full=RPC40 && PF01000:RNA polymerase Rpb3/RpoA insert domain|PF01193:RNA polymerase Rpb3/Rpb11 dimerisation do…	RNA_pol_A_bac
Scaffold-34.74	83.6708	75.0565	58.4812	88.1112	70.1373	81.3364	62.5636	55.5432	54.6167	protein_coding_gene	Scaffold-34	1089484	1103037	+	2046	-	- && Q969T9.1 RecName: Full=WW domain-binding protein 2; Short=WBP-2 && PF10349:WW-domain ligand protein|PF02893:GRAM domain	GRAM
Scaffold-76.19	62.2586	69.6376	62.3408	106.674	73.7535	66.5466	69.542	60.6017	57.9185	protein_coding_gene	Scaffold-76	478921	500383	+	1730	-	- && A2TLM1.1 RecName: Full=Ribose-5-phosphate isomerase; AltName: Full=Phosphoriboisomerase && PF06026:Ribose 5-phosphate isomerase A (phosphoriboisomerase A)	Rib_5-P_isom_A
Scaffold-77.6	61.5178	63.6109	68.094	98.9247	65.5191	73.6063	67.4934	60.7445	69.4233	protein_coding_gene	Scaffold-77	67434	98746	+	2433	-	- && Q6IR75.1 RecName: Full=COP9 signalosome complex subunit 2; Short=Signalosome subunit 2 && PF01399:PCI domain	-
Scaffold-437.5	70.9282	55.969	56.4665	116.177	68.8973	62.0341	85.556	53.6975	58.9837	protein_coding_gene	Scaffold-437	58359	64151	-	652	-	- && Q9D1Q1.1 RecName: Full=M-phase phosphoprotein 6 && PF10175:M-phase phosphoprotein 6	-
Scaffold-62.244	59.5658	79.5419	67.6483	44.7556	76.3256	89.2624	61.5602	68.8856	80.6234	protein_coding_gene	Scaffold-62	3788673	3816352	+	954	-	- && - && -	-
Scaffold-122.112	55.0513	60.4655	65.2722	120.259	53.8871	66.6274	80.2347	59.3804	66.666	protein_coding_gene	Scaffold-122	2448433	2453594	-	501	-	- && - && PF14542:GCN5-related N-acetyl-transferase	-
Scaffold-661.4	78.8	51.0646	56.0833	127.281	66.8599	82.3243	65.1711	55.3086	43.9487	protein_coding_gene	Scaffold-661	26873	30601	-	697	-	- && - && -	-
Scaffold-392.6	66.3094	65.2165	72.6814	94.6825	78.1333	64.2402	64.784	66.1164	54.3296	protein_coding_gene	Scaffold-392	17101	26194	-	952	-	- && Q99KB8.2 RecName: Full=Hydroxyacylglutathione hydrolase, mitochondrial; AltName: Full=Glyoxalase II; Short=Glx II; Flags: Precursor && PF16123:Hydroxyacylglutathione hydrolase C-terminus	-
Scaffold-9.177	72.4977	62.6907	63.3961	93.1152	79.0885	69.9438	60.4663	61.7497	62.0019	protein_coding_gene	Scaffold-9	3128954	3145506	-	2381	-	- && Q6AZI2.1 RecName: Full=Coiled-coil domain-containing protein 47; Flags: Precursor [Xenopus laevis] && PF07946:Protein of unknown function (DUF1682)	-
Scaffold-20.387	59.7528	56.2128	62.0178	106.53	74.8774	77.5982	61.7756	60.8674	64.9108	protein_coding_gene	Scaffold-20	9208013	9217438	-	1526	-	- && Q9CQT9.1 RecName: Full=Uncharacterized protein C20orf24 homolog && PF07019:Rab5-interacting protein (Rab5ip)	Rab5ip
Scaffold-14.14	63.91	70.908	67.4315	82.7208	69.5574	70.403	68.647	62.7321	67.8107	protein_coding_gene	Scaffold-14	317688	347151	+	2208	-	- && Q9UNH7.1 RecName: Full=Sorting nexin-6; AltName: Full=TRAF4-associated factor 2; Contains: RecName: Full=Sorting nexin-6, N-terminally processed && PF00787:PX domain|PF09325:Vps5 C terminal like	PX
Scaffold-58.158	64.9135	75.5386	52.5945	92.8738	51.9215	91.6595	63.0515	71.3637	59.9831	protein_coding_gene	Scaffold-58	2637696	2638010	-	315	-	- && Q32P66.1 RecName: Full=UPF0587 protein C1orf123 homolog && PF05907:Eukaryotic protein of unknown function (DUF866)	-
Scaffold-74.193	68.2194	62.0114	54.3698	113.264	68.537	76.334	60.8471	64.68	55.4648	protein_coding_gene	Scaffold-74	2456520	2457980	+	948	-	- && Q9P0J6.1 RecName: Full=39S ribosomal protein L36, mitochondrial; Short=L36mt; Short=MRP-L36; AltName: Full=BRCA1-interacting protein 1; Flags: Precursor && PF14529:Endonuclease-reverse transcriptase|PF00444:Ribosomal protein L36	-
Scaffold-35.128	59.9113	82.5804	81.1203	53.2482	71.0109	62.0831	78.2788	73.824	61.4619	protein_coding_gene	Scaffold-35	2349485	2360167	+	885	-	- && Q6P828.1 RecName: Full=Lipopolysaccharide-induced tumor necrosis factor-alpha factor homolog; Short=LPS-induced TNF-alpha factor homolog && PF10601:LITAF-like zinc ribbon domain	-
Scaffold-374.8	68.8127	62.3102	63.8796	122.085	57.1306	66.3685	67.6674	55.228	59.3333	protein_coding_gene	Scaffold-374	99750	105290	-	1351	-	- && P59110.1 RecName: Full=Sentrin-specific protease 1; AltName: Full=SUMO-1 protease 2; Short=SuPr-2; AltName: Full=Sentrin/SUMO-specific protease SENP1 && PF02902:Ulp1 protease family, C-terminal catalytic domain	Peptidase_C48
Scaffold-18.183	54.5164	75.3203	73.0231	68.5563	66.9113	79.1047	49.0713	69.1169	86.602	protein_coding_gene	Scaffold-18	3632218	3635549	-	519	-	- && Q9D6K8.1 RecName: Full=FUN14 domain-containing protein 2; AltName: Full=Hepatitis C virus core-binding protein 6 && PF04930:FUN14 family	-
Scaffold-181.11	63.242	55.9377	55.8724	133.419	66.3579	71.9487	64.3097	54.4553	55.087	protein_coding_gene	Scaffold-181	180538	188923	+	1126	-	- && O75880.1 RecName: Full=Protein SCO1 homolog, mitochondrial; Flags: Precursor && PF02630:SCO1/SenC	-
Scaffold-19.273	65.9915	60.8351	70.0392	97.0899	65.3273	72.9622	64.0687	62.3314	60.222	protein_coding_gene	Scaffold-19	5564477	5565937	+	1461	-	- && Q28DS0.1 RecName: Full=SUMO-activating enzyme subunit 1; AltName: Full=Ubiquitin-like 1-activating enzyme E1A && PF00899:ThiF family	-
Scaffold-42.76	68.9776	56.8027	57.9946	113.69	64.7271	69.6568	63.6207	63.6949	59.6279	protein_coding_gene	Scaffold-42	1346155	1346983	-	829	-	- && Q9VV74.1 RecName: Full=Survival motor neuron protein && PF06003:Survival motor neuron protein (SMN)	-
Scaffold-1.14	61.3704	64.2232	83.1516	107.2	71.3432	65.3518	49.9299	54.0089	61.9432	protein_coding_gene	Scaffold-1	408361	418124	-	1633	-	- && P24140.1 RecName: Full=UDP-N-acetylglucosamine--dolichyl-phosphate N-acetylglucosaminephosphotransferase; AltName: Full=GlcNAc-1-P transferase; Short=G1PT; Short=GPT; AltName: Full=N-acetylglucosamine-1-phosphate transferase && PF00953:Glycosyl transferase family 4	Glycos_transf_4
Scaffold-63.48	80.3274	64.0682	64.8206	113.379	54.1099	62.7013	68.962	58.4917	51.5222	protein_coding_gene	Scaffold-63	932587	960512	+	2180	-	- && A1ZAI5.1 RecName: Full=Putative fatty acyl-CoA reductase CG5065 && PF03015:Male sterility protein|PF07993:Male sterility protein	NAD_binding_4
Scaffold-28.19	61.9371	74.4779	76.567	18.6911	84.6702	66.818	65.6686	81.7728	87.6609	protein_coding_gene	Scaffold-28	316882	337012	+	1929	-	- && P30153.4 RecName: Full=Serine/threonine-protein phosphatase 2A 65 kDa regulatory subunit A alpha isoform; AltName: Full=Medium tumor antigen-associated 61 kDa protein; AltName: Full=PP2A subunit A isoform PR65-alpha; AltName: Full=PP2A subunit A isoform R1-alpha && PF13646:HEAT repeats	-
Scaffold-9.292	67.8967	76.982	81.4611	39.9538	70.4798	68.5433	68.1282	69.5262	75.2345	protein_coding_gene	Scaffold-9	5257046	5268588	-	1413	-	- && P22464.2 RecName: Full=Annexin B9; AltName: Full=Annexin IX; AltName: Full=Annexin-9 && PF00191:Annexin	-
Scaffold-28.18	61.0989	67.3156	67.2992	64.8926	93.2777	65.5239	51.4903	65.9314	81.3606	protein_coding_gene	Scaffold-28	311902	312152	+	251	-	- && P55786.2 RecName: Full=Puromycin-sensitive aminopeptidase; Short=PSA; AltName: Full=Cytosol alanyl aminopeptidase; Short=AAP-S && -	-
Scaffold-357.5	71.4201	65.7195	66.016	74.1924	67.8687	70.4004	76.7246	66.2246	59.574	protein_coding_gene	Scaffold-357	152687	161175	-	1573	-	- && - && -	-
Scaffold-122.252	97.2922	70.2962	61.9114	23.4738	31.3442	26.7657	188.499	95.2494	22.9089	protein_coding_gene	Scaffold-122	4572918	4602781	-	3045	-	- && O96553.4 RecName: Full=C-1-tetrahydrofolate synthase, cytoplasmic; Short=C1-THF synthase; Includes: RecName: Full=Methylenetetrahydrofolate dehydrogenase; Includes: RecName: Full=Methenyltetrahydrofolate cyclohydrolase; Includes: RecName: Full=Formyltetrahydrofolate synthetase && PF02882:Tetrahydrofolate dehydrogenase/cyclohydrolase, NAD(P)-binding domain|PF00763:Tetrahydrofolate dehydrogena…	-
Scaffold-131.47	58.535	55.323	58.4331	130.655	64.208	70.1985	67.0713	50.162	63.1335	protein_coding_gene	Scaffold-131	944538	946656	+	656	-	- && - && -	-
Scaffold-59.133	68.4803	68.7194	70.1467	64.3031	71.4109	66.2484	79.7117	74.449	53.5184	protein_coding_gene	Scaffold-59	2320243	2341621	-	3288	-	- && Q9VBY8.5 RecName: Full=Protein unc-13 homolog 4B; AltName: Full=Protein Staccato && PF00168:C2 domain	C2
Scaffold-53.40	65.7111	64.8252	61.9798	88.8802	75.2416	74.1412	64.4178	55.0997	66.4145	protein_coding_gene	Scaffold-53	640581	647478	-	1934	-	- && Q54IA4.1 RecName: Full=GPI mannosyltransferase 1; AltName: Full=GPI mannosyltransferase I; Short=GPI-MT-I; AltName: Full=Phosphatidylinositol-glycan biosynthesis class M protein; Short=PIG-M && PF08991:Mature-T-Cell Proliferation I type|PF05007:Mannosyltransferase (PIG-M)	-
Scaffold-175.19	65.8366	62.2678	60.714	86.1629	75.9552	67.1205	63.8934	76.2	56.2182	protein_coding_gene	Scaffold-175	181686	200688	-	2463	-	- && Q9VSS2.1 RecName: Full=Signal recognition particle subunit SRP68; Short=SRP68; AltName: Full=Signal recognition particle 68 kDa protein && PF16969:RNA-binding signal recognition particle 68	-
Scaffold-556.4	65.1367	78.0313	77.4391	89.1239	60.4024	61.7619	69.8651	55.4948	56.7745	protein_coding_gene	Scaffold-556	42224	44362	+	1148	-	- && O55013.1 RecName: Full=Trafficking protein particle complex subunit 3; AltName: Full=BET3 homolog >Q5U1Z2.1 RecName: Full=Trafficking protein particle complex subunit 3 && PF04051:Transport protein particle (TRAPP) component	TRAPP_Bet3
Scaffold-96.86	77.6906	58.9342	47.3975	109.586	58.3696	74.0574	76.4406	56.2199	55.1639	protein_coding_gene	Scaffold-96	1892316	1906436	+	1140	-	- && Q2KI14.1 RecName: Full=N-alpha-acetyltransferase 10; AltName: Full=N-terminal acetyltransferase complex ARD1 subunit homolog A; AltName: Full=NatA catalytic subunit Naa10 && PF00583:Acetyltransferase (GNAT) family	Acetyltransf_1
Scaffold-29.29	59.0535	62.9207	62.0272	96.7726	70.5011	74.817	69.8262	53.9635	63.6876	protein_coding_gene	Scaffold-29	510091	518631	-	920	-	- && Q7SZ78.1 RecName: Full=THO complex subunit 7 homolog && PF05615:Tho complex subunit 7	-
Scaffold-475.3	76.6592	54.4274	77.5475	79.4135	75.9861	66.8535	68.1946	60.5693	53.7562	protein_coding_gene	Scaffold-475	28109	28795	-	687	-	- && - && -	-
Scaffold-283.27	43.9183	67.7131	63.2224	88.3012	75.633	58.1971	78.6871	78.5978	58.9585	protein_coding_gene	Scaffold-283	537366	540362	-	471	-	- && Q9D1X9.1 RecName: Full=Transmembrane protein 50B && PF05255:Uncharacterised protein family (UPF0220)	-
Scaffold-33.51	17.6962	15.7725	41.0538	2.81668	453.506	1.39495	0	5.9634	74.9095	protein_coding_gene	Scaffold-33	660700	668230	+	786	-	- && - && PF01097:Arthropod defensin	-
Scaffold-31.70	65.3278	63.7538	71.7962	113.255	61.423	61.5015	67.0259	50.255	58.4321	protein_coding_gene	Scaffold-31	1305891	1311888	-	828	-	- && - && PF15002:ERK and JNK pathways, inhibitor	-
Scaffold-11.102	62.4069	80.6613	72.246	34.4979	73.0762	66.474	67.4893	73.0634	81.853	protein_coding_gene	Scaffold-11	2216421	2240908	-	1884	-	- && - && PF08597:Translation initiation factor eIF3 subunit	-
Scaffold-106.24	75.4322	57.5066	90.6357	56.9443	62.4883	74.0883	69.7493	57.8302	66.725	protein_coding_gene	Scaffold-106	411311	441188	+	1669	-	- && - && -	-
Scaffold-1.13	62.9122	67.6247	70.8712	51.1731	78.3612	70.3982	63.7	71.9179	74.415	protein_coding_gene	Scaffold-1	397829	407072	+	822	-	- && P80386.4 RecName: Full=5'-AMP-activated protein kinase subunit beta-1; Short=AMPK subunit beta-1; Short=AMPKb; AltName: Full=5'-AMP-activated protein kinase 40 kDa subunit && PF04739:5'-AMP-activated protein kinase beta subunit, interaction domain|PF16561:Glycogen recognition site of AMP-activated protein kinase	-
Scaffold-1807.1	68.8266	56.3227	59.1721	98.2316	65.2191	61.665	87.1261	59.3588	54.3795	protein_coding_gene	Scaffold-1807	248	9391	+	1539	-	- && B2RS91.1 RecName: Full=RNA polymerase I-specific transcription initiation factor RRN3 && PF05327:RNA polymerase I specific transcription initiation factor RRN3	RRN3
Scaffold-135.24	63.4986	61.3344	58.6686	113.34	58.0185	69.2287	66.9749	66.6829	52.1921	protein_coding_gene	Scaffold-135	362475	363646	+	1172	-	- && A2T806.1 RecName: Full=Polyglutamine-binding protein 1; Short=PQBP-1; AltName: Full=Polyglutamine tract-binding protein 1 && -	-
Scaffold-4644.1	122.924	88.3802	3.03192	5.69291	86.2573	121.582	5.32167	10.5224	166.044	protein_coding_gene	Scaffold-4644	1479	1978	-	500	-	- && P11733.2 RecName: Full=Cuticle protein 7; AltName: Full=LM-ACP 7; Short=LM-7 && PF00379:Insect cuticle protein	Chitin_bind_4
Scaffold-18.178	39.534	89.131	88.1074	138.742	45.4431	38.2143	57.3765	53.2435	59.6423	protein_coding_gene	Scaffold-18	3602586	3603009	+	424	-	- && - && -	-
Scaffold-215.7	66.8567	59.4866	56.8719	121.375	52.1506	70.7027	65.127	74.8537	41.8104	protein_coding_gene	Scaffold-215	190021	217081	-	11679	-	- && P82147.1 RecName: Full=Protein lethal(2)essential for life; AltName: Full=Protein Efl21 && PF00011:Hsp20/alpha crystallin family	-
Scaffold-70.68	50.7127	63.6445	57.8278	111.694	74.8961	71.8563	61.976	51.2424	65.1319	protein_coding_gene	Scaffold-70	1501605	1502823	-	1219	-	- && Q9QZ88.1 RecName: Full=Vacuolar protein sorting-associated protein 29; AltName: Full=Vesicle protein sorting 29 && PF12850:Calcineurin-like phosphoesterase superfamily domain	-
Scaffold-59.63	76.1623	70.5831	67.21	63.1398	73.5974	69.6464	58.8115	58.5057	70.8347	protein_coding_gene	Scaffold-59	1325923	1333331	-	551	-	- && B5X7X4.1 RecName: Full=Ragulator complex protein LAMTOR2; AltName: Full=Late endosomal/lysosomal adaptor and MAPK and MTOR activator 2 && PF03259:Roadblock/LC7 domain	-
Scaffold-41.17	47.6391	62.8844	55.3184	50.7641	84.6663	85.4547	81.464	67.0991	72.8154	protein_coding_gene	Scaffold-41	507712	530283	+	1380	-	- && P49891.2 RecName: Full=Estrogen sulfotransferase, testis isoform; AltName: Full=Sulfotransferase 1E1; Short=ST1E1; AltName: Full=Sulfotransferase, estrogen-preferring && PF00685:Sulfotransferase domain	Sulfotransfer_1
Scaffold-159.41	58.978	61.4581	63.2821	112.133	60.5212	66.2396	74.6251	59.8793	49.9033	protein_coding_gene	Scaffold-159	681403	685881	-	1155	-	- && - && PF00096:Zinc finger, C2H2 type	zf-C2H2
Scaffold-72.326	66.0826	56.505	67.6515	86.7247	62.0609	64.5428	79.9878	62.614	60.7752	protein_coding_gene	Scaffold-72	6032842	6040837	-	1074	-	- && Q16I17.1 RecName: Full=Methylthioribose-1-phosphate isomerase; Short=M1Pi; Short=MTR-1-P isomerase; AltName: Full=S-methyl-5-thioribose-1-phosphate isomerase; AltName: Full=Translation initiation factor eIF-2B subunit alpha/beta/delta-like protein && PF01008:Initiation factor 2 subunit family	-
Scaffold-341.9	59.5213	52.7971	62.4877	99.857	72.6006	73.4241	60.8618	66.337	58.8435	protein_coding_gene	Scaffold-341	128597	161858	+	2225	-	- && P29074.1 RecName: Full=Tyrosine-protein phosphatase non-receptor type 4; AltName: Full=Protein-tyrosine phosphatase MEG1; Short=MEG; Short=PTPase-MEG1 && PF01849:NAC domain|PF00595:PDZ domain (Also known as DHR or GLGF)|PF09379:FERM N-terminal domain|PF09380:FERM C-terminal PH-like domain|PF00373:FERM central domain|PF08736:FERM adjacent (FA)	Band_41
Scaffold-20.146	62.5514	75.4676	65.0536	65.124	72.185	73.7803	65.379	64.8841	61.6766	protein_coding_gene	Scaffold-20	4320846	4341605	+	1032	-	- && Q7JXF7.1 RecName: Full=Protein seele; Flags: Precursor && PF11938:TLR4 regulator and MIR-interacting MSAP	-
Scaffold-42.93	75.1281	65.0096	58.7208	77.5218	64.9884	72.9347	65.8716	69.0038	56.8882	protein_coding_gene	Scaffold-42	1675640	1726900	-	3937	-	- && O45040.1 RecName: Full=Guanine nucleotide-binding protein G(I)/G(S)/G(T) subunit beta-1; AltName: Full=Transducin beta chain 1 && PF00400:WD domain, G-beta repeat	WD40
Scaffold-525.2	80.3158	48.3356	64.117	108.828	58.9221	64.0785	64.9495	60.8594	55.303	protein_coding_gene	Scaffold-525	4940	10945	+	635	-	- && - && PF12796:Ankyrin repeats (3 copies)	-
Scaffold-159.32	71.246	56.5487	46.7326	142.489	58.7234	59.8443	66.9543	54.7767	48.35	protein_coding_gene	Scaffold-159	532713	555329	+	1425	-	- && Q8K354.1 RecName: Full=Carbonyl reductase [NADPH] 3; AltName: Full=NADPH-dependent carbonyl reductase 3 && -	-
Scaffold-34.107	68.5993	64.6125	61.6383	76.4082	63.3574	75.9705	64.1718	59.3255	71.5358	protein_coding_gene	Scaffold-34	1804599	1821396	-	4102	-	- && O75608.1 RecName: Full=Acyl-protein thioesterase 1; Short=APT-1; Short=hAPT1; AltName: Full=Lysophospholipase 1; AltName: Full=Lysophospholipase I; Short=LPL-I; Short=LysoPLA I && PF02230:Phospholipase/Carboxylesterase	Abhydrolase_2
Scaffold-14.60	65.2112	56.2278	44.2141	140.593	53.3358	65.1365	64.5734	60.4309	54.4041	protein_coding_gene	Scaffold-14	1270981	1293471	+	649	-	- && Q14691.1 RecName: Full=DNA replication complex GINS protein PSF1; AltName: Full=GINS complex subunit 1 && -	-
Scaffold-59.97	40.6322	96.3273	52.6039	14.4344	67.5998	94.5201	79.8019	56.2693	101.235	protein_coding_gene	Scaffold-59	1778959	1801629	+	986	-	- && Q1QWA6.1 RecName: Full=Pyridoxine/pyridoxamine 5'-phosphate oxidase; AltName: Full=PNP/PMP oxidase; Short=PNPOx; AltName: Full=Pyridoxal 5'-phosphate synthase && PF01243:Pyridoxamine 5'-phosphate oxidase	Pyridox_oxidase
Scaffold-18.167	68.1592	65.5686	60.0518	79.7271	68.8938	65.6845	72.975	61.6993	60.2785	protein_coding_gene	Scaffold-18	3423183	3453246	-	2400	-	- && P49283.2 RecName: Full=Protein Malvolio && PF01566:Natural resistance-associated macrophage protein|PF01016:Ribosomal L27 protein	-
Scaffold-137.78	68.5193	72.2785	55.6788	70.7548	68.2624	65.5411	84.9653	61.08	55.5136	protein_coding_gene	Scaffold-137	1149893	1171798	+	1303	-	- && Q96KC2.1 RecName: Full=ADP-ribosylation factor-like protein 5B; AltName: Full=ADP-ribosylation factor-like protein 8 >Q9D4P0.3 RecName: Full=ADP-ribosylation factor-like protein 5B; AltName: Full=ADP-ribosylation factor-like protein 8 && PF00025:ADP-ribosylation factor family	Arf
Scaffold-16.19	68.1937	66.0543	58.9247	108.731	57.9476	57.3253	67.6525	59.5258	57.6109	protein_coding_gene	Scaffold-16	349132	369417	-	1562	-	- && Q8BY71.1 RecName: Full=Histone acetyltransferase type B catalytic subunit; AltName: Full=Histone acetyltransferase 1 && PF10394:Histone acetyl transferase HAT1 N-terminus	-
Scaffold-128.8	57.1585	64.4249	64.2877	104.817	73.4771	65.8721	61.1636	54.0004	56.1425	protein_coding_gene	Scaffold-128	182039	191065	-	1302	-	- && Q78PG9.1 RecName: Full=Coiled-coil domain-containing protein 25 && PF05670:Domain of unknown function (DUF814)	-
Scaffold-1412.1	92.6276	44.1593	32.6301	100.528	39.3061	106.488	109.348	37.0193	38.2105	protein_coding_gene	Scaffold-1412	513	19647	+	969	-	- && Q5RC24.3 RecName: Full=Cytochrome b-c1 complex subunit 7; AltName: Full=Complex III subunit 7; AltName: Full=Complex III subunit VII; AltName: Full=Ubiquinol-cytochrome c reductase complex 14 kDa protein && PF13855:Leucine rich repeat|PF02271:Ubiquinol-cytochrome C reductase complex 14kD subunit	-
Scaffold-17.345	63.401	66.2028	68.3518	70.9225	72.0989	63.2413	65.1406	64.5612	65.5522	protein_coding_gene	Scaffold-17	7496533	7509992	-	2747	-	- && Q9U5N1.1 RecName: Full=V-type proton ATPase subunit C; Short=V-ATPase subunit C; AltName: Full=Vacuolar proton pump subunit C && PF03223:V-ATPase subunit C	-
Scaffold-225.26	49.1566	56.6588	54.8559	129.5	68.5768	62.7886	62.4243	60.7329	51.7016	protein_coding_gene	Scaffold-225	582234	584074	+	1364	-	- && Q9JK81.1 RecName: Full=UPF0160 protein MYG1, mitochondrial; AltName: Full=Protein Gamm1; Flags: Precursor && PF03690:Uncharacterised protein family (UPF0160)	-
Scaffold-234.25	57.083	74.1284	63.6957	32.6657	62.0644	81.4951	73.7098	68.4391	82.2427	protein_coding_gene	Scaffold-234	613046	629845	-	731	-	- && Q8BUZ1.1 RecName: Full=Actin-binding Rho-activating protein; AltName: Full=Striated muscle activator of Rho-dependent signaling; Short=STARS && PF14705:Costars	-
Scaffold-58.99	59.0735	48.2366	61.6207	126.618	63.5179	63.8854	63.4838	54.7649	54.0429	protein_coding_gene	Scaffold-58	1889043	1904451	-	1455	-	- && - && -	-
Scaffold-285.19	69.7949	61.2978	77.9621	44.006	81.1211	59.4758	62.8806	74.4816	63.8723	protein_coding_gene	Scaffold-285	423789	446786	-	2882	-	- && P12234.1 RecName: Full=Phosphate carrier protein, mitochondrial; AltName: Full=Phosphate transport protein; Short=PTP; AltName: Full=Solute carrier family 25 member 3; Flags: Precursor && PF09668:Aspartyl protease|PF00240:Ubiquitin family|PF00153:Mitochondrial carrier protein	Mito_carr
Scaffold-610.10	70.6402	54.9696	61.4975	98.692	69.4052	64.0028	73.9408	54.3274	46.0715	protein_coding_gene	Scaffold-610	121331	127884	-	1104	-	- && O76485.1 RecName: Full=Casein kinase II subunit beta; Short=CK II beta && PF01214:Casein kinase II regulatory subunit	-
Scaffold-381.6	58.6887	54.4182	51.0193	137.674	53.254	62.1981	64.2888	57.7176	54.0891	protein_coding_gene	Scaffold-381	72835	76895	+	711	-	- && Q9VTC4.1 RecName: Full=MIP18 family protein CG7949 && PF01883:Domain of unknown function DUF59	-
Scaffold-1083.7	70.7269	54.5869	57.3925	82.2793	54.3976	59.6655	92.391	76.7321	44.2193	protein_coding_gene	Scaffold-1083	95201	98081	-	2881	-	- && - && -	-
Scaffold-20.5	90.4402	64.3444	58.777	91.4743	60.1186	55.0488	69.0241	48.8282	53.8711	protein_coding_gene	Scaffold-20	48425	57563	-	2441	-	- && Q12907.1 RecName: Full=Vesicular integral-membrane protein VIP36; AltName: Full=Glycoprotein GP36b; AltName: Full=Lectin mannose-binding 2; AltName: Full=Vesicular integral-membrane protein 36; Short=VIP36; Flags: Precursor && PF03388:Legume-like lectin family	-
Scaffold-58.35	60.2912	67.0917	70.0443	55.1477	67.1642	73.5781	66.385	65.5608	65.7181	protein_coding_gene	Scaffold-58	783004	794513	+	909	-	- && - && PF02466:Tim17/Tim22/Tim23/Pmp24 family	-
Scaffold-383.2	155.416	28.9898	1.34179	3.91912	234.734	92.6904	4.12149	5.45261	64.2097	protein_coding_gene	Scaffold-383	16800	23380	-	807	-	- && P80681.1 RecName: Full=Larval cuticle protein A1A; AltName: Full=TM-LCP A1A; Short=TM-A1A && PF00379:Insect cuticle protein	Chitin_bind_4
Scaffold-848.1	89.1617	42.6095	78.6339	74.9266	46.4093	55.9819	81.6804	46.9179	74.5244	protein_coding_gene	Scaffold-848	5823	7305	+	420	-	- && Q6DHC1.1 RecName: Full=Ras-related protein Rab-18-B; Flags: Precursor && PF00071:Ras family	Ras
Scaffold-65.52	50.7258	82.9138	63.8161	74.7208	70.3188	78.845	49.2021	49.3081	70.7782	protein_coding_gene	Scaffold-65	1183695	1194894	+	1746	-	- && P36537.1 RecName: Full=UDP-glucuronosyltransferase 2B10; Short=UDPGT 2B10; Flags: Precursor && PF00201:UDP-glucoronosyl and UDP-glucosyl transferase	UDPGT
Scaffold-532.4	59.8889	65.4279	64.5414	89.566	64.0279	71.1799	64.606	56.3858	54.9473	protein_coding_gene	Scaffold-532	102756	121874	-	2124	-	- && Q9VVS4.1 RecName: Full=Mediator of RNA polymerase II transcription subunit 11; AltName: Full=Mediator complex subunit 11; AltName: Full=dMED21 && PF10280:Mediator complex protein|PF03647:Transmembrane proteins 14C	-
Scaffold-61.46	58.2943	61.1972	60.013	92.0621	66.4085	64.0336	66.8307	67.145	53.5233	protein_coding_gene	Scaffold-61	879949	891814	+	1503	-	- && Q9CY21.1 RecName: Full=Probable 18S rRNA (guanine-N(7))-methyltransferase; AltName: Full=Bud site selection protein 23 homolog; AltName: Full=Williams-Beuren syndrome chromosomal region 22 protein homolog && PF08241:Methyltransferase domain|PF13639:Ring finger domain|PF12589:Methyltransferase involved in Williams-Beuren syndrome	Methyltransf_11
Scaffold-20.228	63.2152	62.3598	60.3915	84.8871	66.1547	71.2409	65.4787	60.8731	54.8399	protein_coding_gene	Scaffold-20	5857784	5880473	-	2772	-	- && Q9EQH3.1 RecName: Full=Vacuolar protein sorting-associated protein 35; AltName: Full=Maternal-embryonic 3; AltName: Full=Vesicle protein sorting 35 && PF03635:Vacuolar protein sorting-associated protein 35	-
Scaffold-534.18	63.9078	53.4241	60.0875	80.0331	77.7754	73.9406	58.2874	62.9117	59.0217	protein_coding_gene	Scaffold-534	259176	275077	+	1557	-	- && Q5ZML3.3 RecName: Full=Serine/arginine-rich splicing factor 1; AltName: Full=Splicing factor, arginine/serine-rich 1 && PF00076:RNA recognition motif. (a.k.a. RRM, RBD, or RNP domain)	RRM_1
Scaffold-9.296	62.7569	58.8984	58.5611	73.4743	75.2913	79.0626	60.1855	51.8634	68.8767	protein_coding_gene	Scaffold-9	5285540	5301022	-	1470	-	- && Q5EAD4.1 RecName: Full=Short/branched chain specific acyl-CoA dehydrogenase, mitochondrial; Short=SBCAD; AltName: Full=2-methyl branched chain acyl-CoA dehydrogenase; Short=2-MEBCAD; AltName: Full=2-methylbutyryl-coenzyme A dehydrogenase; Short=2-methylbutyryl-CoA dehydrogenase; Flags: Precursor && PF02771:Acyl-CoA dehydrogenase, N-terminal domain|PF02770:Acyl-CoA dehydrogenase, middle domai…	-
Scaffold-77.84	71.8411	54.1269	33.5246	136.406	66.9538	91.9746	40.5922	42.1274	50.5577	protein_coding_gene	Scaffold-77	1282403	1296589	-	604	-	- && - && -	-
Scaffold-144.11	73.3961	53.3593	62.7178	87.354	55.6017	68.8797	75.1129	54.3174	55.4271	protein_coding_gene	Scaffold-144	169408	179756	-	1231	-	- && - && -	-
Scaffold-48.1	66.0101	45.4076	51.2227	108.053	71.0331	75.2793	53.0861	63.1058	52.408	protein_coding_gene	Scaffold-48	12124	33214	+	1484	-	- && Q6NZ09.1 RecName: Full=Proteasomal ubiquitin receptor ADRM1 && PF16550:UCH-binding domain|PF04683:Proteasome complex subunit Rpn13 ubiquitin receptor	-
Scaffold-27.78	54.9208	62.9212	65.3391	88.3968	68.0336	68.6191	53.4923	57.789	62.8385	protein_coding_gene	Scaffold-27	1447276	1488037	-	2814	-	- && Q0R4F1.1 RecName: Full=ATP-dependent DNA helicase PIF1; AltName: Full=DNA repair and recombination helicase PIF1 && PF04750:FAR-17a/AIG1-like protein|PF05970:PIF1-like helicase	-
Scaffold-46.70	58.6584	63.5799	46.2152	75.2097	72.3677	80.7769	61.7583	61.796	60.6124	protein_coding_gene	Scaffold-46	1570706	1622178	-	1291	-	- && - && -	-
Scaffold-6.232	52.2712	60.9461	48.8747	110.142	58.5539	77.2671	65.8183	56.948	48.8897	protein_coding_gene	Scaffold-6	4079506	4082143	+	771	-	- && - && PF09495:Protein of unknown function (DUF2462)	-
Scaffold-46.22	66.6656	70.261	56.6823	81.0663	63.8973	46.9125	62.8958	46.7353	83.4848	protein_coding_gene	Scaffold-46	640064	656831	-	831	-	- && - && PF00836:Stathmin family	-
Scaffold-17.174	51.9514	82.1694	83.4757	16.2122	75.3233	55.8892	48.93	71.9351	91.8751	protein_coding_gene	Scaffold-17	3690482	3715982	-	1746	-	- && B0WYY2.1 RecName: Full=Moesin/ezrin/radixin homolog 1 && PF09379:FERM N-terminal domain|PF00769:Ezrin/radixin/moesin family|PF09380:FERM C-terminal PH-like domain|PF00373:FERM central domain	Band_41
Scaffold-161.9	70.3774	61.1874	51.6124	109.143	51.6863	68.9844	56.5287	53.7106	54.3092	protein_coding_gene	Scaffold-161	314676	322259	-	1049	-	- && Q9D8B1.1 RecName: Full=Androgen-induced gene 1 protein; Short=AIG-1 && PF04750:FAR-17a/AIG1-like protein	-
Scaffold-54.110	58.0588	54.6389	60.4369	108.979	58.8769	56.4744	70.0569	56.3565	53.3359	protein_coding_gene	Scaffold-54	1949033	1966742	-	1290	-	- && P07903.2 RecName: Full=DNA excision repair protein ERCC-1 && PF03834:Binding domain of DNA repair protein Ercc1 (rad10/Swi10)	-
Scaffold-15.126	63.4622	59.0309	66.3232	82.5565	59.8002	58.8527	61.7694	63.725	61.3965	protein_coding_gene	Scaffold-15	2560831	2570050	+	1360	-	- && P43236.1 RecName: Full=Cathepsin K; AltName: Full=Protein OC-2; Flags: Precursor && PF00112:Papain family cysteine protease|PF08246:Cathepsin propeptide inhibitor domain (I29)	Peptidase_C1
Scaffold-266.5	63.8236	65.0944	67.4659	26.1098	70.9592	65.657	77.7606	59.6992	80.1672	protein_coding_gene	Scaffold-266	96819	102382	+	963	-	- && P34276.1 RecName: Full=GILT-like protein C02D5.2 && PF03227:Gamma interferon inducible lysosomal thiol reductase (GILT)	-
Scaffold-392.5	101.746	48.6377	28.7778	61.9724	46.4237	130.057	70.6303	33.1786	55.0213	protein_coding_gene	Scaffold-392	11434	16024	+	222	-	- && P60896.1 RecName: Full=26S proteasome complex subunit DSS1; AltName: Full=Deleted in split hand/split foot protein 1; AltName: Full=Split hand/foot deleted protein 1; AltName: Full=Split hand/foot malformation type 1 protein >P60897.1 RecName: Full=26S proteasome complex subunit DSS1; AltName: Full=Deleted in split hand/split foot protein 1 homolog; AltName: Full=Split hand/foot deleted prot…	-
Scaffold-465.61	55.2803	55.2376	46.2909	90.1378	54.0509	74.6184	103.582	55.4815	41.7496	protein_coding_gene	Scaffold-465	543955	548632	+	400	-	- && - && -	-
Scaffold-3.17	59.2648	56.5897	52.1332	101.944	65.9005	64.6184	62.2488	55.4219	57.9787	protein_coding_gene	Scaffold-3	290103	293710	+	1348	-	- && Q7PR68.2 RecName: Full=Mediator of RNA polymerase II transcription subunit 7; AltName: Full=Mediator complex subunit 7 && PF05983:MED7 protein	MED7
Scaffold-48.7	52.8366	67.0348	66.2419	68.2632	55.9397	65.5028	72.8198	59.3738	65.934	protein_coding_gene	Scaffold-48	84791	93225	-	783	-	- && - && PF08583:Cytochrome c oxidase biogenesis protein Cmc1 like	-
Scaffold-375.9	59.9606	52.6723	52.4516	137.604	53.8435	67.0727	56.4721	42.9923	50.7518	protein_coding_gene	Scaffold-375	77789	84795	+	801	-	- && Q9VAI0.1 RecName: Full=Probable glucosamine 6-phosphate N-acetyltransferase; AltName: Full=Phosphoglucosamine acetylase; AltName: Full=Phosphoglucosamine transacetylase && PF00583:Acetyltransferase (GNAT) family	Acetyltransf_1
Scaffold-159.42	63.3101	48.5098	55.9354	123.983	56.5415	62.2105	62.9783	54.6212	45.6246	protein_coding_gene	Scaffold-159	686267	708077	+	1690	-	- && Q0VCJ2.1 RecName: Full=Methylthioribulose-1-phosphate dehydratase; Short=MTRu-1-P dehydratase; AltName: Full=APAF1-interacting protein && PF00596:Class II Aldolase and Adducin N-terminal domain	Aldolase_II
Scaffold-128.7	62.0544	65.627	66.4831	48.0638	65.6193	60.4021	77.014	64.1527	64.0954	protein_coding_gene	Scaffold-128	141790	174743	+	3935	-	- && O35343.1 RecName: Full=Importin subunit alpha-3; AltName: Full=Importin alpha Q1; Short=Qip1; AltName: Full=Karyopherin subunit alpha-4 && PF00153:Mitochondrial carrier protein|PF16186:Atypical Arm repeat|PF01749:Importin beta binding domain|PF00514:Armadillo/beta-catenin-like repeat	Mito_carr
Scaffold-103.15	48.6132	55.9173	70.5276	35.1831	103.679	64.6117	43.638	75.1921	75.645	protein_coding_gene	Scaffold-103	174883	191219	+	2108	-	- && Q5ZJU3.3 RecName: Full=Asparagine synthetase [glutamine-hydrolyzing]; AltName: Full=Glutamine-dependent asparagine synthetase && PF13537:Glutamine amidotransferase domain|PF00733:Asparagine synthase	-
Scaffold-84.79	63.6712	61.6895	48.8959	93.508	81.6077	63.6461	57.849	36.9891	64.9366	protein_coding_gene	Scaffold-84	1505392	1527436	+	3499	-	- && Q8C3S2.1 RecName: Full=Transport and Golgi organization protein 6 homolog; AltName: Full=Transmembrane and coiled-coil domain-containing protein 7 && PF10363:Required for nuclear transport of RNA pol II C-terminus 1|PF10304:Required for nuclear transport of RNA pol II C-terminus 2	-
Scaffold-20.67	66.5455	67.7626	69.0343	41.3149	70.813	66.3641	55.7337	67.9946	66.4841	protein_coding_gene	Scaffold-20	2013367	2049159	-	3330	-	- && Q8HXX4.1 RecName: Full=Trifunctional enzyme subunit beta, mitochondrial; AltName: Full=TP-beta; Includes: RecName: Full=3-ketoacyl-CoA thiolase; AltName: Full=Acetyl-CoA acyltransferase; AltName: Full=Beta-ketothiolase; Flags: Precursor && PF00108:Thiolase, N-terminal domain|PF00884:Sulfatase|PF02803:Thiolase, C-terminal domain	Thiolase_N
Scaffold-240.35	72.048	56.3626	67.6014	70.6295	62.3183	55.1662	69.8587	62.6107	54.8591	protein_coding_gene	Scaffold-240	432174	560848	+	9529	-	- && P08183.3 RecName: Full=Multidrug resistance protein 1; AltName: Full=ATP-binding cassette sub-family B member 1; AltName: Full=P-glycoprotein 1; AltName: CD_antigen=CD243 && PF02743:Cache domain|PF13768:von Willebrand factor type A domain|PF00240:Ubiquitin family|PF00664:ABC transporter transmembrane region|PF08399:VWA N-terminal|PF00005:ABC transporter|PF07673:Protein of unknown function (D…	ABC_membrane
Scaffold-43.54	69.0439	58.3125	59.8661	77.1314	63.2189	59.7986	62.8817	65.4032	55.5996	protein_coding_gene	Scaffold-43	1006559	1034753	+	3225	-	- && B5DF89.2 RecName: Full=Cullin-3 && PF00888:Cullin family|PF10557:Cullin protein neddylation domain	Cullin
Scaffold-29.25	59.011	55.945	59.8089	78.4961	62.9012	72.931	60.236	59.5727	61.9612	protein_coding_gene	Scaffold-29	458441	460513	+	2073	-	- && Q9H845.1 RecName: Full=Acyl-CoA dehydrogenase family member 9, mitochondrial; Short=ACAD-9; Flags: Precursor && PF02771:Acyl-CoA dehydrogenase, N-terminal domain|PF00441:Acyl-CoA dehydrogenase, C-terminal domain|PF02770:Acyl-CoA dehydrogenase, middle domain	-
Scaffold-546.10	81.1983	64.5788	70.0729	53.3427	60.7012	59.6743	49.3337	67.1664	64.4936	protein_coding_gene	Scaffold-546	249449	258330	-	1672	-	- && P21902.1 RecName: Full=Proclotting enzyme; Contains: RecName: Full=Proclotting enzyme light chain; Contains: RecName: Full=Proclotting enzyme heavy chain; Flags: Precursor && PF00089:Trypsin	Trypsin
Scaffold-15.162	68.3158	61.3181	61.7596	88.3254	59.3202	56.0059	67.266	50.7572	56.7851	protein_coding_gene	Scaffold-15	3722610	3737595	+	931	-	- && Q2TBU3.1 RecName: Full=Golgi SNAP receptor complex member 1; AltName: Full=28 kDa Golgi SNARE protein; AltName: Full=28 kDa cis-Golgi SNARE p28 && PF12352:Snare region anchored in the vesicle membrane C-terminus	-
Scaffold-366.4	54.956	76.2188	62.4528	60.6213	76.6572	54.8375	53.5727	66.3714	64.1426	protein_coding_gene	Scaffold-366	52599	73782	-	1153	-	- && B4JT39.1 RecName: Full=Mesencephalic astrocyte-derived neurotrophic factor homolog; AltName: Full=MANF/CDNF-like protein; Flags: Precursor && PF14774:FAM177 family|PF10208:Degradation arginine-rich protein for mis-folding	-
Scaffold-1.198	75.9672	58.7582	51.6383	108.93	53.0197	45.5979	76.2124	59.1677	38.1147	protein_coding_gene	Scaffold-1	3824424	3851981	+	4737	-	- && - && -	-
Scaffold-66.88	73.5371	72.462	60.1089	95.4946	63.008	58.5123	54.7199	43.7713	45.7696	protein_coding_gene	Scaffold-66	1686842	1706080	+	1497	-	- && Q9HBH5.1 RecName: Full=Retinol dehydrogenase 14; AltName: Full=Alcohol dehydrogenase PAN2; AltName: Full=Short chain dehydrogenase/reductase family 7C member 4 && PF00106:short chain dehydrogenase	adh_short
Scaffold-43.89	55.2477	54.2059	60.7388	66.8589	65.9866	77.2306	58.6494	65.455	62.7553	protein_coding_gene	Scaffold-43	1799621	1821286	-	2027	-	- && P82924.4 RecName: Full=28S ribosomal protein S30, mitochondrial; Short=MRP-S30; Short=S30mt && PF07147:Mitochondrial 28S ribosomal protein S30 (PDCD9)	-
Scaffold-64.6	57.451	60.8721	77.2462	68.5491	65.3084	61.2259	50.2168	57.6319	67.6361	protein_coding_gene	Scaffold-64	181167	240052	-	5645	-	- && Q8BWQ1.1 RecName: Full=UDP-glucuronosyltransferase 2A3; Short=UDPGT 2A3; Flags: Precursor && PF00201:UDP-glucoronosyl and UDP-glucosyl transferase|PF03088:Strictosidine synthase|PF00078:Reverse transcriptase (RNA-dependent DNA polymerase)|PF00005:ABC transporter|PF00664:ABC transporter transmembrane region	UDPGT
Scaffold-78.63	60.7465	56.2809	66.118	42.0963	70.9816	63.9472	87.2421	57.948	60.722	protein_coding_gene	Scaffold-78	1262805	1294285	+	1867	-	- && Q5ZHN3.1 RecName: Full=WD repeat domain phosphoinositide-interacting protein 2; Short=WIPI-2 && -	-
Scaffold-121.6	71.4602	51.1577	48.2581	97.4486	60.2487	52.7857	85.3569	44.0789	54.7364	protein_coding_gene	Scaffold-121	184448	189358	-	727	-	- && P92029.1 RecName: Full=DnaJ-like protein 60 && PF00226:DnaJ domain	DnaJ
Scaffold-72.542	66.7489	54.8673	47.7597	99.0107	60.7676	65.4679	55.4039	63.2869	51.2818	protein_coding_gene	Scaffold-72	10821734	10827704	-	789	-	- && - && -	-
Scaffold-190.9	64.7989	59.7926	55.2045	57.4634	67.1817	64.6165	65.5339	73.0728	56.7554	protein_coding_gene	Scaffold-190	211164	244400	-	4227	-	- && Q5ZHS1.1 RecName: Full=Elongator complex protein 3 && PF00583:Acetyltransferase (GNAT) family|PF02854:MIF4G domain|PF16199:Radical_SAM C-terminal domain|PF04055:Radical SAM superfamily|PF02020:eIF4-gamma/eIF5/eIF2-epsilon	Radical_SAM
Scaffold-146.28	66.9935	90.8615	62.3152	22.4558	76.5236	72.2943	47.1598	53.9058	71.749	protein_coding_gene	Scaffold-146	595567	602071	-	669	-	- && P34276.1 RecName: Full=GILT-like protein C02D5.2 && PF03227:Gamma interferon inducible lysosomal thiol reductase (GILT)	-
Scaffold-160.20	94.198	72.2383	70.0491	51.6387	63.8325	46.5154	72.9483	56.4555	36.1584	protein_coding_gene	Scaffold-160	339360	371822	-	2750	-	- && P81900.2 RecName: Full=cAMP-dependent protein kinase type II regulatory subunit && PF00348:Polyprenyl synthetase|PF00027:Cyclic nucleotide-binding domain	cNMP_binding
Scaffold-203.9	69.2123	53.3149	52.1283	84.3291	68.9454	66.2771	58.2081	56.0656	55.2771	protein_coding_gene	Scaffold-203	142809	144042	-	1022	-	- && - && -	-
Scaffold-234.21	60.2499	57.8587	54.9306	112.647	51.2756	61.6233	64.0458	50.1064	50.8669	protein_coding_gene	Scaffold-234	457296	484161	+	2058	-	- && Q9BW72.1 RecName: Full=HIG1 domain family member 2A, mitochondrial; AltName: Full=RCF1 homolog B; Short=RCF1b && PF05071:NADH ubiquinone oxidoreductase subunit NDUFA12|PF04588:Hypoxia induced protein conserved region	Complex1_17_2kD
Scaffold-303.19	49.802	60.6621	54.873	86.1203	81.2163	71.8609	51.1106	53.1288	54.8064	protein_coding_gene	Scaffold-303	212363	214633	+	1480	-	- && P79896.1 RecName: Full=Alcohol dehydrogenase class-3; AltName: Full=Alcohol dehydrogenase class-III; AltName: Full=Glutathione-dependent formaldehyde dehydrogenase; Short=FALDH; Short=FDH; Short=GSH-FDH; AltName: Full=S-(hydroxymethyl)glutathione dehydrogenase && PF00107:Zinc-binding dehydrogenase|PF08240:Alcohol dehydrogenase GroES-like domain	ADH_zinc_N
Scaffold-272.12	71.3417	56.5656	71.5691	63.4026	51.0305	43.8396	93.6461	65.6621	46.3492	protein_coding_gene	Scaffold-272	222565	236054	+	1923	-	- && P15651.2 RecName: Full=Short-chain specific acyl-CoA dehydrogenase, mitochondrial; Short=SCAD; AltName: Full=Butyryl-CoA dehydrogenase; Flags: Precursor && PF00441:Acyl-CoA dehydrogenase, C-terminal domain|PF02771:Acyl-CoA dehydrogenase, N-terminal domain|PF02770:Acyl-CoA dehydrogenase, middle domain	-
Scaffold-407.10	64.7745	53.3166	56.3352	57.4418	80.2477	73.3424	51.6407	66.8635	58.6928	protein_coding_gene	Scaffold-407	303958	314467	-	1382	-	- && Q9VXK6.1 RecName: Full=Eukaryotic translation initiation factor 5; Short=eIF-5 && PF02020:eIF4-gamma/eIF5/eIF2-epsilon|PF01873:Domain found in IF2B/IF5	-
Scaffold-49.21	50.6166	68.8921	60.9659	84.6052	56.1681	56.3061	65.7489	65.3795	53.4609	protein_coding_gene	Scaffold-49	710229	713444	-	357	-	- && - && -	-
Scaffold-18.160	49.6734	62.1661	64.0218	89.8414	54.4849	73.5382	60.7375	52.4498	54.8453	protein_coding_gene	Scaffold-18	3265669	3271112	+	1211	-	- && Q9VPL3.1 RecName: Full=39S ribosomal protein L10, mitochondrial; Short=L10mt; Short=MRP-L10; Flags: Precursor && -	-
Scaffold-332.1	58.8295	54.8423	67.0529	33.9622	70.6218	67.5902	60.9296	85.2146	62.5083	protein_coding_gene	Scaffold-332	11493	33481	+	2235	-	- && Q8BGD9.1 RecName: Full=Eukaryotic translation initiation factor 4B; Short=eIF-4B && PF00076:RNA recognition motif. (a.k.a. RRM, RBD, or RNP domain)|PF00078:Reverse transcriptase (RNA-dependent DNA polymerase)	RVT_1
Scaffold-54.64	61.3411	59.5757	72.5593	68.8688	59.3361	62.6514	70.1875	49.5761	56.5921	protein_coding_gene	Scaffold-54	1321380	1323131	+	1752	-	- && C9WMM5.1 RecName: Full=Venom serine carboxypeptidase; AltName: Allergen=Api m 9; Flags: Precursor && PF00450:Serine carboxypeptidase	Peptidase_S10
Scaffold-24.356	77.7607	54.2501	60.1768	67.9209	55.7358	60.4137	74.0765	54.3367	54.3625	protein_coding_gene	Scaffold-24	8816084	8833591	+	1220	-	- && Q96AJ9.2 RecName: Full=Vesicle transport through interaction with t-SNAREs homolog 1A; AltName: Full=Vesicle transport v-SNARE protein Vti1-like 2; AltName: Full=Vti1-rp2 && PF05008:Vesicle transport v-SNARE protein N-terminus|PF12352:Snare region anchored in the vesicle membrane C-terminus	-
Scaffold-2072.3	68.133	33.8368	76.9982	91.9355	47.5567	53.0115	69.3673	57.9812	59.5297	protein_coding_gene	Scaffold-2072	5388	6235	+	848	-	- && - && -	-
Scaffold-128.24	65.4076	53.3428	68.1199	76.4369	62.5654	61.8612	59.604	55.0944	55.6021	protein_coding_gene	Scaffold-128	661047	739489	-	3726	-	- && Q9VFL5.2 RecName: Full=Methionine--tRNA ligase, mitochondrial; AltName: Full=Mitochondrial methionyl-tRNA synthetase; Short=MtMetRS; Flags: Precursor && PF00335:Tetraspanin family|PF00535:Glycosyl transferase family 2|PF09334:tRNA synthetases class I (M)	Tetraspannin
Scaffold-365.24	56.8511	59.3549	60.275	78.0347	66.2617	71.6623	64.1814	51.3718	49.6889	protein_coding_gene	Scaffold-365	334117	337311	+	918	-	- && Q178L7.1 RecName: Full=Succinate dehydrogenase assembly factor 2, mitochondrial; Short=SDH assembly factor 2; Short=SDHAF2; Flags: Precursor && PF03937:Flavinator of succinate dehydrogenase	-
Scaffold-24.178	56.6715	58.8279	59.3162	27.8675	79.7675	70.4466	51.2616	76.3434	76.4447	protein_coding_gene	Scaffold-24	4811492	4825649	-	1674	-	- && - && PF16174:Intracellular hyaluronan-binding protein 4 N-terminal|PF04774:Hyaluronan / mRNA binding family	-
Scaffold-51.83	58.976	44.7474	52.6163	79.0682	53.294	65.012	76.589	72.155	54.2847	protein_coding_gene	Scaffold-51	1930554	1941056	+	1278	-	- && - && PF00405:Transferrin	-
Scaffold-224.63	56.6106	57.3642	52.7466	109.745	61.6517	67.1422	49.184	50.1811	51.9973	protein_coding_gene	Scaffold-224	1130737	1145166	+	1281	-	- && Q8WTC1.2 RecName: Full=28S ribosomal protein S15, mitochondrial; Short=MRP-S15; Short=S15mt; AltName: Full=DmMRPS15; AltName: Full=Protein bonsai; Flags: Precursor && PF00312:Ribosomal protein S15	-
Scaffold-159.49	73.424	61.4202	70.2772	25.3433	74.3842	56.3459	58.8259	73.6932	62.8731	protein_coding_gene	Scaffold-159	761734	782383	+	2134	-	- && Q5RC80.1 RecName: Full=RNA-binding protein 39; AltName: Full=RNA-binding motif protein 39 && PF15519:linker between RRM2 and RRM3 domains in RBM39 protein|PF00076:RNA recognition motif. (a.k.a. RRM, RBD, or RNP domain)	RRM_1
Scaffold-64.38	100.13	40.3183	2.25589	5.17709	146.029	125.452	16.8282	8.11383	110.622	protein_coding_gene	Scaffold-64	1028032	1032108	+	672	-	- && P11734.1 RecName: Full=Cuticle protein 8; AltName: Full=LM-ACP 8; Short=LM-8 && PF00379:Insect cuticle protein	Chitin_bind_4
Scaffold-327.19	55.7423	52.3069	49.1414	103.983	64.958	65.5243	57.8917	51.6014	53.028	protein_coding_gene	Scaffold-327	296391	305304	-	2523	-	- && Q9V535.1 RecName: Full=RNA-binding protein 8A; AltName: Full=Protein tsunagi && PF00076:RNA recognition motif. (a.k.a. RRM, RBD, or RNP domain)|PF00078:Reverse transcriptase (RNA-dependent DNA polymerase)	RVT_1
Scaffold-29.19	61.0477	59.0997	62.3207	73.808	58.1461	53.6102	59.1714	59.9601	66.1314	protein_coding_gene	Scaffold-29	384745	414362	-	2886	-	- && Q80W54.2 RecName: Full=CAAX prenyl protease 1 homolog; AltName: Full=Farnesylated proteins-converting enzyme 1; Short=FACE-1; AltName: Full=Prenyl protein-specific endoprotease 1; AltName: Full=Zinc metalloproteinase Ste24 homolog && PF01435:Peptidase family M48|PF16491:CAAX prenyl protease N-terminal, five membrane helices	Peptidase_M48
Scaffold-464.12	60.327	56.3212	53.98	99.8074	52.4219	60.3683	64.439	55.741	49.4915	protein_coding_gene	Scaffold-464	213937	229356	+	1342	-	- && Q9W6I0.1 RecName: Full=Ubiquinol-cytochrome-c reductase complex assembly factor 1; AltName: Full=Basic FGF-repressed Zic-binding protein homolog; AltName: Full=Ubiquinol-cytochrome c reductase complex chaperone CBP3 homolog; AltName: Full=Zic3-binding protein && PF03981:Ubiquinol-cytochrome C chaperone	-
Scaffold-143.40	57.8753	52.1485	44.9562	91.4825	69.7632	62.1325	60.4826	52.012	61.2386	protein_coding_gene	Scaffold-143	839263	851931	+	949	-	- && Q9W3C0.1 RecName: Full=Probable U3 small nucleolar RNA-associated protein 11; Short=U3 snoRNA-associated protein 11 && PF03998:Utp11 protein	-
Scaffold-185.36	87.432	65.6996	81.8136	35.3088	55.7149	41.7689	71.9009	61.8486	50.5918	protein_coding_gene	Scaffold-185	538257	548509	+	945	-	- && Q171H3.1 RecName: Full=Molybdopterin synthase catalytic subunit 1; AltName: Full=Molybdenum cofactor synthesis protein 2 large subunit 1; AltName: Full=Molybdenum cofactor synthesis protein 2B 1; Short=MOCS2B 1 && PF02391:MoaE protein|PF02597:ThiS family	ThiS
Scaffold-1.159	73.3068	47.5043	64.6539	59.7335	73.1598	52.436	58.7245	54.7386	67.2863	protein_coding_gene	Scaffold-1	2963519	2969033	+	3018	-	- && - && PF13855:Leucine rich repeat	-
Scaffold-15.223	53.5599	50.0821	48.1781	78.035	60.2984	81.7985	67.4729	58.5137	52.791	protein_coding_gene	Scaffold-15	5246272	5257435	-	1607	-	- && P29147.2 RecName: Full=D-beta-hydroxybutyrate dehydrogenase, mitochondrial; AltName: Full=3-hydroxybutyrate dehydrogenase; Short=BDH; Flags: Precursor && PF00106:short chain dehydrogenase	adh_short
[truncated: 19,981 more rows]
